# Supplementary material for: Identification of mitochondria-related hub genes in sarcopenia and functional regulation of MFG-E8 on ROS-mediated mitochondrial dysfunction and cell cycle arrest
Source: Royal Society of Chemistry journal article supplement (doi:10.1039/d1fo02610k), 2021-12-01
Supplement: d1fo02610k2.xlsx [file d1fo02610k2.xlsx]

## Sheet: Sheet1
NAME	GS<br> follow link to MSigDB	GS DETAILS	SIZE	ES	NES	NOM p-val	FDR q-val	FWER p-val	RANK AT MAX	LEADING EDGE
GOBP_MRNA_PROCESSING	GOBP_MRNA_PROCESSING	Details ...	100	0.53825	2.13259	0	0.0303312	0.024	755	tags=57%, list=28%, signal=76%
GOCC_CATALYTIC_STEP_2_SPLICEOSOME	GOCC_CATALYTIC_STEP_2_SPLICEOSOME	Details ...	15	0.714155	2.10011	0	0.0251481	0.035	741	tags=80%, list=27%, signal=109%
GOBP_MRNA_METABOLIC_PROCESS	GOBP_MRNA_METABOLIC_PROCESS	Details ...	169	0.43978	2.08903	0	0.0219802	0.043	768	tags=45%, list=28%, signal=59%
GOBP_RNA_SPLICING_VIA_TRANSESTERIFICATION_REACTIONS	GOBP_RNA_SPLICING_VIA_TRANSESTERIFICATION_REACTIONS	Details ...	71	0.517637	2.01151	0.00194932	0.0477642	0.117	755	tags=54%, list=28%, signal=72%
GOBP_REGULATION_OF_MYELOID_CELL_DIFFERENTIATION	GOBP_REGULATION_OF_MYELOID_CELL_DIFFERENTIATION	Details ...	42	0.588038	1.96761	0	0.0712705	0.205	419	tags=33%, list=15%, signal=39%
GOMF_MRNA_BINDING	GOMF_MRNA_BINDING	Details ...	67	0.487878	1.96268	0	0.0628781	0.214	697	tags=45%, list=26%, signal=59%
GOBP_RNA_SPLICING	GOBP_RNA_SPLICING	Details ...	87	0.488609	1.94958	0.00191205	0.0635299	0.245	755	tags=55%, list=28%, signal=74%
GOCC_U2_TYPE_SPLICEOSOMAL_COMPLEX	GOCC_U2_TYPE_SPLICEOSOMAL_COMPLEX	Details ...	16	0.635438	1.91307	0.00206612	0.085969	0.345	918	tags=81%, list=34%, signal=122%
GOBP_REGULATION_OF_HEMOPOIESIS	GOBP_REGULATION_OF_HEMOPOIESIS	Details ...	73	0.53231	1.90397	0	0.0843598	0.372	420	tags=30%, list=15%, signal=35%
GOBP_REGULATION_OF_MRNA_PROCESSING	GOBP_REGULATION_OF_MRNA_PROCESSING	Details ...	34	0.601803	1.90321	0.00402414	0.0763307	0.374	660	tags=59%, list=24%, signal=77%
GOBP_NEGATIVE_REGULATION_OF_MRNA_METABOLIC_PROCESS	GOBP_NEGATIVE_REGULATION_OF_MRNA_METABOLIC_PROCESS	Details ...	20	0.648464	1.89965	0.00199601	0.0729559	0.384	438	tags=50%, list=16%, signal=59%
GOBP_REGULATION_OF_MRNA_METABOLIC_PROCESS	GOBP_REGULATION_OF_MRNA_METABOLIC_PROCESS	Details ...	69	0.48962	1.88272	0.00204499	0.0828922	0.436	768	tags=51%, list=28%, signal=69%
GOBP_NEGATIVE_REGULATION_OF_MYELOID_CELL_DIFFERENTIATION	GOBP_NEGATIVE_REGULATION_OF_MYELOID_CELL_DIFFERENTIATION	Details ...	22	0.686275	1.87599	0.00187617	0.0818488	0.45	389	tags=36%, list=14%, signal=42%
GOBP_RNA_PROCESSING	GOBP_RNA_PROCESSING	Details ...	164	0.402007	1.84748	0	0.108226	0.554	755	tags=47%, list=28%, signal=61%
GOBP_REGULATION_OF_RNA_SPLICING	GOBP_REGULATION_OF_RNA_SPLICING	Details ...	32	0.56487	1.84696	0.00785855	0.101625	0.556	755	tags=63%, list=28%, signal=85%
GOBP_RESPONSE_TO_AXON_INJURY	GOBP_RESPONSE_TO_AXON_INJURY	Details ...	17	0.638509	1.82661	0.00200401	0.120466	0.626	364	tags=41%, list=13%, signal=47%
GOBP_CHROMATIN_ASSEMBLY_OR_DISASSEMBLY	GOBP_CHROMATIN_ASSEMBLY_OR_DISASSEMBLY	Details ...	22	0.576839	1.82386	0.00568182	0.11739	0.639	691	tags=45%, list=25%, signal=60%
GOBP_NUCLEAR_EXPORT	GOBP_NUCLEAR_EXPORT	Details ...	39	0.52856	1.81873	0.00776699	0.117595	0.665	636	tags=54%, list=23%, signal=69%
GOBP_REGULATION_OF_HISTONE_MODIFICATION	GOBP_REGULATION_OF_HISTONE_MODIFICATION	Details ...	31	0.547852	1.81424	0.00625	0.117807	0.682	578	tags=35%, list=21%, signal=45%
GOBP_REGULATION_OF_MRNA_SPLICING_VIA_SPLICEOSOME	GOBP_REGULATION_OF_MRNA_SPLICING_VIA_SPLICEOSOME	Details ...	25	0.592616	1.81072	0.00614754	0.1165	0.695	755	tags=64%, list=28%, signal=88%
GOBP_REGULATION_OF_GENE_SILENCING	GOBP_REGULATION_OF_GENE_SILENCING	Details ...	24	0.560325	1.79794	0.00984252	0.128142	0.731	631	tags=50%, list=23%, signal=65%
GOBP_PROTEIN_SUMOYLATION	GOBP_PROTEIN_SUMOYLATION	Details ...	23	0.591535	1.79504	0.0121457	0.126759	0.74	821	tags=70%, list=30%, signal=99%
GOBP_RNA_EXPORT_FROM_NUCLEUS	GOBP_RNA_EXPORT_FROM_NUCLEUS	Details ...	26	0.57072	1.78948	0.00952381	0.128821	0.759	636	tags=62%, list=23%, signal=80%
GOCC_SITE_OF_POLARIZED_GROWTH	GOCC_SITE_OF_POLARIZED_GROWTH	Details ...	42	0.551251	1.78498	0.002	0.129295	0.769	337	tags=33%, list=12%, signal=37%
GOBP_MRNA_3_END_PROCESSING	GOBP_MRNA_3_END_PROCESSING	Details ...	21	0.617532	1.78028	0.00194932	0.131619	0.785	578	tags=57%, list=21%, signal=72%
GOCC_NUCLEAR_SPECK	GOCC_NUCLEAR_SPECK	Details ...	99	0.432835	1.77952	0.00203252	0.127339	0.787	697	tags=42%, list=26%, signal=55%
GOBP_POSITIVE_REGULATION_OF_CHROMATIN_ORGANIZATION	GOBP_POSITIVE_REGULATION_OF_CHROMATIN_ORGANIZATION	Details ...	22	0.590704	1.77362	0.0123711	0.130843	0.804	729	tags=55%, list=27%, signal=74%
GOCC_SPLICEOSOMAL_COMPLEX	GOCC_SPLICEOSOMAL_COMPLEX	Details ...	32	0.484595	1.76789	0.0198413	0.133478	0.82	746	tags=63%, list=27%, signal=85%
GOBP_REGULATION_OF_GENE_SILENCING_BY_RNA	GOBP_REGULATION_OF_GENE_SILENCING_BY_RNA	Details ...	23	0.554961	1.75865	0.015748	0.141648	0.846	622	tags=48%, list=23%, signal=61%
GOMF_RNA_HELICASE_ACTIVITY	GOMF_RNA_HELICASE_ACTIVITY	Details ...	17	0.630116	1.73734	0.0094162	0.169245	0.895	148	tags=24%, list=5%, signal=25%
GOBP_RIBONUCLEOPROTEIN_COMPLEX_SUBUNIT_ORGANIZATION	GOBP_RIBONUCLEOPROTEIN_COMPLEX_SUBUNIT_ORGANIZATION	Details ...	32	0.480113	1.72776	0.0217822	0.179485	0.916	785	tags=50%, list=29%, signal=69%
GOCC_PROTEIN_ACETYLTRANSFERASE_COMPLEX	GOCC_PROTEIN_ACETYLTRANSFERASE_COMPLEX	Details ...	16	0.570852	1.72612	0.0141988	0.176749	0.919	423	tags=38%, list=16%, signal=44%
GOBP_NEGATIVE_REGULATION_OF_LYMPHOCYTE_DIFFERENTIATION	GOBP_NEGATIVE_REGULATION_OF_LYMPHOCYTE_DIFFERENTIATION	Details ...	19	0.63058	1.71806	0.00198413	0.18511	0.932	93	tags=21%, list=3%, signal=22%
GOBP_RNA_LOCALIZATION	GOBP_RNA_LOCALIZATION	Details ...	42	0.474783	1.7082	0.00604839	0.199824	0.946	649	tags=50%, list=24%, signal=65%
GOMF_HELICASE_ACTIVITY	GOMF_HELICASE_ACTIVITY	Details ...	34	0.513887	1.70764	0.00198807	0.194944	0.946	706	tags=41%, list=26%, signal=55%
GOBP_ESTABLISHMENT_OF_CELL_POLARITY	GOBP_ESTABLISHMENT_OF_CELL_POLARITY	Details ...	30	0.515077	1.70692	0.00795229	0.190861	0.947	433	tags=33%, list=16%, signal=39%
GOBP_RESPONSE_TO_RETINOIC_ACID	GOBP_RESPONSE_TO_RETINOIC_ACID	Details ...	17	0.621036	1.70642	0.00623701	0.18669	0.949	253	tags=41%, list=9%, signal=45%
GOMF_MOTOR_ACTIVITY	GOMF_MOTOR_ACTIVITY	Details ...	23	0.607369	1.70092	0	0.192615	0.957	522	tags=43%, list=19%, signal=53%
GOBP_NUCLEAR_TRANSPORT	GOBP_NUCLEAR_TRANSPORT	Details ...	68	0.434714	1.6993	0.00790514	0.190493	0.959	645	tags=46%, list=24%, signal=58%
GOBP_REGULATION_OF_CHROMATIN_ORGANIZATION	GOBP_REGULATION_OF_CHROMATIN_ORGANIZATION	Details ...	38	0.487768	1.69743	0.0164609	0.18891	0.96	761	tags=45%, list=28%, signal=61%
GOBP_NEGATIVE_REGULATION_OF_LYMPHOCYTE_ACTIVATION	GOBP_NEGATIVE_REGULATION_OF_LYMPHOCYTE_ACTIVATION	Details ...	32	0.562549	1.69473	0.00400802	0.189545	0.963	93	tags=16%, list=3%, signal=16%
GOBP_VIRAL_GENE_EXPRESSION	GOBP_VIRAL_GENE_EXPRESSION	Details ...	55	0.366167	1.693	0.0445344	0.188179	0.965	997	tags=60%, list=37%, signal=93%
GOCC_NUCLEAR_PROTEIN_CONTAINING_COMPLEX	GOCC_NUCLEAR_PROTEIN_CONTAINING_COMPLEX	Details ...	224	0.373059	1.6855	0.00613497	0.197394	0.974	573	tags=30%, list=21%, signal=35%
GOBP_REGULATION_OF_LEUKOCYTE_DIFFERENTIATION	GOBP_REGULATION_OF_LEUKOCYTE_DIFFERENTIATION	Details ...	58	0.477719	1.6814	0.00380952	0.200601	0.977	465	tags=28%, list=17%, signal=33%
GOBP_MRNA_EXPORT_FROM_NUCLEUS	GOBP_MRNA_EXPORT_FROM_NUCLEUS	Details ...	19	0.594705	1.67412	0.0154739	0.209877	0.981	622	tags=68%, list=23%, signal=88%
GOCC_ACTIN_CYTOSKELETON	GOCC_ACTIN_CYTOSKELETON	Details ...	111	0.415767	1.67294	0.00397614	0.207947	0.981	572	tags=32%, list=21%, signal=39%
GOBP_ESTABLISHMENT_OF_RNA_LOCALIZATION	GOBP_ESTABLISHMENT_OF_RNA_LOCALIZATION	Details ...	37	0.477656	1.67287	0.0198413	0.203575	0.982	649	tags=51%, list=24%, signal=66%
GOBP_CELLULAR_RESPONSE_TO_MECHANICAL_STIMULUS	GOBP_CELLULAR_RESPONSE_TO_MECHANICAL_STIMULUS	Details ...	21	0.576074	1.65435	0.0141129	0.236787	0.988	171	tags=19%, list=6%, signal=20%
GOBP_POSITIVE_REGULATION_OF_CHROMOSOME_ORGANIZATION	GOBP_POSITIVE_REGULATION_OF_CHROMOSOME_ORGANIZATION	Details ...	40	0.489689	1.65053	0.00821355	0.240323	0.988	729	tags=45%, list=27%, signal=61%
GOBP_REGULATION_OF_OSTEOCLAST_DIFFERENTIATION	GOBP_REGULATION_OF_OSTEOCLAST_DIFFERENTIATION	Details ...	15	0.655471	1.64567	0.0137525	0.245381	0.988	419	tags=40%, list=15%, signal=47%
GOBP_DNA_TEMPLATED_TRANSCRIPTION_ELONGATION	GOBP_DNA_TEMPLATED_TRANSCRIPTION_ELONGATION	Details ...	18	0.598725	1.64488	0.0179283	0.242418	0.988	562	tags=44%, list=21%, signal=56%
GOBP_ALTERNATIVE_MRNA_SPLICING_VIA_SPLICEOSOME	GOBP_ALTERNATIVE_MRNA_SPLICING_VIA_SPLICEOSOME	Details ...	19	0.570784	1.64258	0.0322581	0.242644	0.989	143	tags=21%, list=5%, signal=22%
GOMF_PROTEIN_HETERODIMERIZATION_ACTIVITY	GOMF_PROTEIN_HETERODIMERIZATION_ACTIVITY	Details ...	63	0.392435	1.63839	0.00578035	0.247336	0.989	518	tags=32%, list=19%, signal=38%
GOBP_NEGATIVE_REGULATION_OF_CELL_DIFFERENTIATION	GOBP_NEGATIVE_REGULATION_OF_CELL_DIFFERENTIATION	Details ...	143	0.405944	1.63008	0	0.261003	0.992	433	tags=26%, list=16%, signal=29%
GOBP_MYELOID_CELL_DIFFERENTIATION	GOBP_MYELOID_CELL_DIFFERENTIATION	Details ...	78	0.424092	1.6281	0.0039604	0.260685	0.992	419	tags=26%, list=15%, signal=29%
GOBP_DNA_CONFORMATION_CHANGE	GOBP_DNA_CONFORMATION_CHANGE	Details ...	43	0.439396	1.62544	0.00412371	0.261742	0.992	768	tags=35%, list=28%, signal=48%
GOBP_REGULATION_OF_ALTERNATIVE_MRNA_SPLICING_VIA_SPLICEOSOME	GOBP_REGULATION_OF_ALTERNATIVE_MRNA_SPLICING_VIA_SPLICEOSOME	Details ...	17	0.597256	1.62412	0.0323232	0.260165	0.992	143	tags=24%, list=5%, signal=25%
GOMF_CHROMATIN_BINDING	GOMF_CHROMATIN_BINDING	Details ...	111	0.379613	1.62188	0.00835073	0.260672	0.993	583	tags=28%, list=21%, signal=34%
GOCC_CONDENSED_CHROMOSOME_CENTROMERIC_REGION	GOCC_CONDENSED_CHROMOSOME_CENTROMERIC_REGION	Details ...	15	0.585511	1.61625	0.0219124	0.268535	0.994	750	tags=73%, list=28%, signal=101%
GOBP_POSITIVE_REGULATION_OF_MRNA_METABOLIC_PROCESS	GOBP_POSITIVE_REGULATION_OF_MRNA_METABOLIC_PROCESS	Details ...	17	0.561884	1.61394	0.0339321	0.268881	0.994	697	tags=65%, list=26%, signal=86%
GOBP_MUSCLE_STRUCTURE_DEVELOPMENT	GOBP_MUSCLE_STRUCTURE_DEVELOPMENT	Details ...	140	0.393355	1.60979	0.00199601	0.274897	0.995	584	tags=36%, list=21%, signal=43%
GOBP_RESPONSE_TO_NUTRIENT	GOBP_RESPONSE_TO_NUTRIENT	Details ...	36	0.498584	1.60858	0.011236	0.272805	0.996	466	tags=39%, list=17%, signal=46%
GOBP_RNA_DEPENDENT_DNA_BIOSYNTHETIC_PROCESS	GOBP_RNA_DEPENDENT_DNA_BIOSYNTHETIC_PROCESS	Details ...	16	0.569313	1.6078	0.0216963	0.270359	0.996	623	tags=50%, list=23%, signal=64%
GOBP_NEGATIVE_REGULATION_OF_HEMOPOIESIS	GOBP_NEGATIVE_REGULATION_OF_HEMOPOIESIS	Details ...	31	0.546182	1.60202	0.0077821	0.279734	0.998	256	tags=23%, list=9%, signal=25%
GOBP_REGULATION_OF_ALPHA_BETA_T_CELL_ACTIVATION	GOBP_REGULATION_OF_ALPHA_BETA_T_CELL_ACTIVATION	Details ...	19	0.611287	1.60067	0.0160966	0.278303	0.999	116	tags=26%, list=4%, signal=27%
GOCC_NUCLEAR_BODY	GOCC_NUCLEAR_BODY	Details ...	177	0.349029	1.59869	0.00191939	0.278708	0.999	697	tags=36%, list=26%, signal=45%
GOBP_PLATELET_DERIVED_GROWTH_FACTOR_RECEPTOR_SIGNALING_PATHWAY	GOBP_PLATELET_DERIVED_GROWTH_FACTOR_RECEPTOR_SIGNALING_PATHWAY	Details ...	19	0.629142	1.59087	0.0313808	0.293994	0.999	221	tags=32%, list=8%, signal=34%
GOBP_MYELOID_CELL_HOMEOSTASIS	GOBP_MYELOID_CELL_HOMEOSTASIS	Details ...	38	0.481425	1.59014	0.0122951	0.291648	0.999	395	tags=29%, list=15%, signal=33%
GOMF_MONOOXYGENASE_ACTIVITY	GOMF_MONOOXYGENASE_ACTIVITY	Details ...	16	0.613093	1.58536	0.00992064	0.299875	0.999	383	tags=44%, list=14%, signal=51%
GOCC_KINETOCHORE	GOCC_KINETOCHORE	Details ...	20	0.525241	1.58317	0.0339321	0.301143	0.999	750	tags=65%, list=28%, signal=89%
GOCC_PROTEIN_DNA_COMPLEX	GOCC_PROTEIN_DNA_COMPLEX	Details ...	22	0.502138	1.58316	0.0530452	0.296933	0.999	594	tags=50%, list=22%, signal=63%
GOBP_GENE_SILENCING	GOBP_GENE_SILENCING	Details ...	46	0.45476	1.58301	0.0386965	0.293136	0.999	631	tags=41%, list=23%, signal=53%
GOCC_CHROMOSOME_CENTROMERIC_REGION	GOCC_CHROMOSOME_CENTROMERIC_REGION	Details ...	27	0.496144	1.58188	0.0222672	0.292037	0.999	750	tags=56%, list=28%, signal=76%
GOBP_DNA_PACKAGING	GOBP_DNA_PACKAGING	Details ...	19	0.528513	1.58161	0.032197	0.288692	0.999	729	tags=42%, list=27%, signal=57%
GOCC_SUPRAMOLECULAR_COMPLEX	GOCC_SUPRAMOLECULAR_COMPLEX	Details ...	213	0.356136	1.57946	0	0.289981	0.999	553	tags=30%, list=20%, signal=34%
GOBP_REGULATION_OF_LYMPHOCYTE_DIFFERENTIATION	GOBP_REGULATION_OF_LYMPHOCYTE_DIFFERENTIATION	Details ...	39	0.497623	1.57815	0.01222	0.289052	0.999	465	tags=28%, list=17%, signal=34%
GOBP_REGULATION_OF_SYNAPSE_ASSEMBLY	GOBP_REGULATION_OF_SYNAPSE_ASSEMBLY	Details ...	25	0.523558	1.57793	0.0226804	0.285639	0.999	267	tags=20%, list=10%, signal=22%
GOBP_POSITIVE_REGULATION_OF_CELL_JUNCTION_ASSEMBLY	GOBP_POSITIVE_REGULATION_OF_CELL_JUNCTION_ASSEMBLY	Details ...	22	0.610093	1.5774	0.0138614	0.282967	0.999	267	tags=32%, list=10%, signal=35%
GOBP_MRNA_TRANSPORT	GOBP_MRNA_TRANSPORT	Details ...	27	0.491286	1.57567	0.0320641	0.283332	0.999	649	tags=59%, list=24%, signal=77%
GOBP_RIBOSOMAL_SMALL_SUBUNIT_BIOGENESIS	GOBP_RIBOSOMAL_SMALL_SUBUNIT_BIOGENESIS	Details ...	17	0.473979	1.57318	0.0681363	0.285233	0.999	543	tags=35%, list=20%, signal=44%
GOBP_REACTIVE_OXYGEN_SPECIES_BIOSYNTHETIC_PROCESS	GOBP_REACTIVE_OXYGEN_SPECIES_BIOSYNTHETIC_PROCESS	Details ...	24	0.557236	1.57123	0.0178218	0.286074	0.999	411	tags=38%, list=15%, signal=44%
GOBP_REGULATION_OF_REACTIVE_OXYGEN_SPECIES_BIOSYNTHETIC_PROCESS	GOBP_REGULATION_OF_REACTIVE_OXYGEN_SPECIES_BIOSYNTHETIC_PROCESS	Details ...	19	0.582373	1.57004	0.0287356	0.285336	0.999	411	tags=37%, list=15%, signal=43%
GOMF_MYOSIN_BINDING	GOMF_MYOSIN_BINDING	Details ...	19	0.590807	1.56939	0.0163265	0.283307	0.999	360	tags=37%, list=13%, signal=42%
GOBP_RIBONUCLEOPROTEIN_COMPLEX_BIOGENESIS	GOBP_RIBONUCLEOPROTEIN_COMPLEX_BIOGENESIS	Details ...	71	0.355827	1.56517	0.0487329	0.290301	0.999	882	tags=44%, list=32%, signal=63%
GOBP_REGULATION_OF_GENE_EXPRESSION_EPIGENETIC	GOBP_REGULATION_OF_GENE_EXPRESSION_EPIGENETIC	Details ...	29	0.449538	1.56256	0.041502	0.292916	0.999	631	tags=28%, list=23%, signal=36%
GOCC_MICROTUBULE_ASSOCIATED_COMPLEX	GOCC_MICROTUBULE_ASSOCIATED_COMPLEX	Details ...	30	0.503174	1.55524	0.0163599	0.306889	1	541	tags=33%, list=20%, signal=41%
GOCC_TRANS_GOLGI_NETWORK	GOCC_TRANS_GOLGI_NETWORK	Details ...	43	0.431555	1.55487	0.016	0.304246	1	545	tags=37%, list=20%, signal=46%
GOBP_NEGATIVE_REGULATION_OF_MYELOID_LEUKOCYTE_DIFFERENTIATION	GOBP_NEGATIVE_REGULATION_OF_MYELOID_LEUKOCYTE_DIFFERENTIATION	Details ...	15	0.61969	1.55107	0.0311284	0.309739	1	389	tags=33%, list=14%, signal=39%
GOMF_RNA_BINDING	GOMF_RNA_BINDING	Details ...	309	0.273961	1.54941	0.0179283	0.310045	1	749	tags=35%, list=27%, signal=43%
GOMF_TRANSCRIPTION_COACTIVATOR_ACTIVITY	GOMF_TRANSCRIPTION_COACTIVATOR_ACTIVITY	Details ...	53	0.401091	1.54907	0.0287908	0.307334	1	609	tags=38%, list=22%, signal=48%
GOBP_CHROMATIN_ORGANIZATION	GOBP_CHROMATIN_ORGANIZATION	Details ...	131	0.368365	1.54819	0.0121951	0.305988	1	591	tags=29%, list=22%, signal=35%
GOBP_POSITIVE_REGULATION_OF_HEMOPOIESIS	GOBP_POSITIVE_REGULATION_OF_HEMOPOIESIS	Details ...	25	0.49072	1.54765	0.0283976	0.303918	1	295	tags=24%, list=11%, signal=27%
GOBP_POSITIVE_REGULATION_OF_LYMPHOCYTE_DIFFERENTIATION	GOBP_POSITIVE_REGULATION_OF_LYMPHOCYTE_DIFFERENTIATION	Details ...	17	0.582732	1.5447	0.0358566	0.307014	1	295	tags=29%, list=11%, signal=33%
GOBP_RNA_CATABOLIC_PROCESS	GOBP_RNA_CATABOLIC_PROCESS	Details ...	89	0.31489	1.54345	0.08577	0.306508	1	978	tags=48%, list=36%, signal=73%
GOBP_PEPTIDYL_PROLINE_MODIFICATION	GOBP_PEPTIDYL_PROLINE_MODIFICATION	Details ...	15	0.625807	1.54217	0.0299401	0.306034	1	422	tags=40%, list=15%, signal=47%
GOBP_RESPONSE_TO_INTERLEUKIN_1	GOBP_RESPONSE_TO_INTERLEUKIN_1	Details ...	42	0.503859	1.53869	0.0243408	0.310954	1	768	tags=52%, list=28%, signal=72%
GOCC_ACTIN_FILAMENT	GOCC_ACTIN_FILAMENT	Details ...	23	0.512996	1.53565	0.0386179	0.314372	1	522	tags=35%, list=19%, signal=43%
GOBP_NEGATIVE_REGULATION_OF_GENE_EXPRESSION	GOBP_NEGATIVE_REGULATION_OF_GENE_EXPRESSION	Details ...	212	0.310179	1.53556	0.0119048	0.311417	1	584	tags=27%, list=21%, signal=32%
GOBP_REGULATION_OF_MYELOID_LEUKOCYTE_DIFFERENTIATION	GOBP_REGULATION_OF_MYELOID_LEUKOCYTE_DIFFERENTIATION	Details ...	24	0.500244	1.53369	0.0340265	0.312638	1	419	tags=29%, list=15%, signal=34%
GOBP_REGULATION_OF_FAT_CELL_DIFFERENTIATION	GOBP_REGULATION_OF_FAT_CELL_DIFFERENTIATION	Details ...	27	0.515349	1.53363	0.0374016	0.309673	1	437	tags=33%, list=16%, signal=39%
GOBP_SKELETAL_SYSTEM_DEVELOPMENT	GOBP_SKELETAL_SYSTEM_DEVELOPMENT		119	0.407515	1.52888	0.01	0.317289	1	521	tags=32%, list=19%, signal=38%
GOBP_CHROMOSOME_LOCALIZATION	GOBP_CHROMOSOME_LOCALIZATION		17	0.516113	1.5196	0.0477178	0.335753	1	820	tags=53%, list=30%, signal=75%
GOBP_POSITIVE_REGULATION_OF_BIOSYNTHETIC_PROCESS	GOBP_POSITIVE_REGULATION_OF_BIOSYNTHETIC_PROCESS		439	0.329946	1.51921	0	0.333417	1	438	tags=22%, list=16%, signal=22%
GOBP_PHOSPHOLIPID_TRANSPORT	GOBP_PHOSPHOLIPID_TRANSPORT		19	0.575533	1.5166	0.0336842	0.336711	1	421	tags=42%, list=15%, signal=49%
GOBP_COVALENT_CHROMATIN_MODIFICATION	GOBP_COVALENT_CHROMATIN_MODIFICATION		90	0.384403	1.5162	0.0226804	0.334382	1	591	tags=31%, list=22%, signal=38%
GOBP_POSITIVE_REGULATION_OF_NUCLEOBASE_CONTAINING_COMPOUND_METABOLIC_PROCESS	GOBP_POSITIVE_REGULATION_OF_NUCLEOBASE_CONTAINING_COMPOUND_METABOLIC_PROCESS		420	0.328332	1.51567	0.00199203	0.332553	1	601	tags=29%, list=22%, signal=31%
GOBP_NUCLEOBASE_CONTAINING_COMPOUND_TRANSPORT	GOBP_NUCLEOBASE_CONTAINING_COMPOUND_TRANSPORT		49	0.407407	1.51424	0.0219561	0.332815	1	649	tags=43%, list=24%, signal=55%
GOBP_NEGATIVE_REGULATION_OF_TRANSMEMBRANE_RECEPTOR_PROTEIN_SERINE_THREONINE_KINASE_SIGNALING_PATHWAY	GOBP_NEGATIVE_REGULATION_OF_TRANSMEMBRANE_RECEPTOR_PROTEIN_SERINE_THREONINE_KINASE_SIGNALING_PATHWAY		28	0.505555	1.51129	0.0564516	0.336755	1	110	tags=18%, list=4%, signal=18%
GOBP_RESPONSE_TO_TUMOR_NECROSIS_FACTOR	GOBP_RESPONSE_TO_TUMOR_NECROSIS_FACTOR		53	0.448643	1.51082	0.019685	0.334859	1	420	tags=26%, list=15%, signal=31%
GOBP_ORGANOPHOSPHATE_ESTER_TRANSPORT	GOBP_ORGANOPHOSPHATE_ESTER_TRANSPORT		26	0.511349	1.508	0.0337302	0.339166	1	421	tags=35%, list=15%, signal=41%
GOCC_CORTICAL_ACTIN_CYTOSKELETON	GOCC_CORTICAL_ACTIN_CYTOSKELETON		24	0.463924	1.50731	0.041841	0.337922	1	511	tags=25%, list=19%, signal=31%
GOBP_FIBROBLAST_PROLIFERATION	GOBP_FIBROBLAST_PROLIFERATION		19	0.576658	1.50436	0.0223124	0.342047	1	187	tags=37%, list=7%, signal=39%
GOBP_CHROMOSOME_ORGANIZATION	GOBP_CHROMOSOME_ORGANIZATION		209	0.33833	1.50391	0.0121457	0.340222	1	591	tags=27%, list=22%, signal=32%
GOBP_MUSCLE_ORGAN_DEVELOPMENT	GOBP_MUSCLE_ORGAN_DEVELOPMENT		71	0.43189	1.50201	0.0160966	0.341877	1	384	tags=27%, list=14%, signal=30%
GOMF_MRNA_3_UTR_BINDING	GOMF_MRNA_3_UTR_BINDING		21	0.461695	1.50056	0.0518962	0.342395	1	697	tags=43%, list=26%, signal=57%
GOMF_ATPASE_ACTIVITY	GOMF_ATPASE_ACTIVITY		94	0.363234	1.50027	0.00811359	0.340312	1	452	tags=22%, list=17%, signal=26%
GOBP_NEGATIVE_REGULATION_OF_SMALL_GTPASE_MEDIATED_SIGNAL_TRANSDUCTION	GOBP_NEGATIVE_REGULATION_OF_SMALL_GTPASE_MEDIATED_SIGNAL_TRANSDUCTION		16	0.590786	1.49758	0.0453564	0.34395	1	241	tags=44%, list=9%, signal=48%
GOBP_REGULATION_OF_T_CELL_DIFFERENTIATION	GOBP_REGULATION_OF_T_CELL_DIFFERENTIATION		32	0.479913	1.49634	0.0377734	0.343901	1	295	tags=22%, list=11%, signal=24%
GOBP_RIBOSOME_BIOGENESIS	GOBP_RIBOSOME_BIOGENESIS		55	0.342026	1.49204	0.0813492	0.351524	1	882	tags=44%, list=32%, signal=63%
GOBP_IMMUNE_SYSTEM_DEVELOPMENT	GOBP_IMMUNE_SYSTEM_DEVELOPMENT		195	0.344689	1.49108	0.00393701	0.350947	1	420	tags=22%, list=15%, signal=24%
GOBP_REGULATION_OF_NUCLEOCYTOPLASMIC_TRANSPORT	GOBP_REGULATION_OF_NUCLEOCYTOPLASMIC_TRANSPORT		29	0.449329	1.49046	0.0674847	0.349587	1	729	tags=52%, list=27%, signal=70%
GOBP_SKELETAL_MUSCLE_ORGAN_DEVELOPMENT	GOBP_SKELETAL_MUSCLE_ORGAN_DEVELOPMENT		33	0.501619	1.48927	0.0359168	0.349472	1	384	tags=30%, list=14%, signal=35%
GOBP_ALPHA_BETA_T_CELL_DIFFERENTIATION	GOBP_ALPHA_BETA_T_CELL_DIFFERENTIATION		23	0.531463	1.48637	0.0382409	0.353992	1	406	tags=35%, list=15%, signal=41%
GOBP_T_CELL_ACTIVATION_INVOLVED_IN_IMMUNE_RESPONSE	GOBP_T_CELL_ACTIVATION_INVOLVED_IN_IMMUNE_RESPONSE		18	0.533713	1.48197	0.055102	0.362377	1	406	tags=33%, list=15%, signal=39%
GOBP_OVULATION_CYCLE	GOBP_OVULATION_CYCLE		17	0.564543	1.48089	0.0527426	0.362349	1	836	tags=59%, list=31%, signal=84%
GOBP_MONONUCLEAR_CELL_MIGRATION	GOBP_MONONUCLEAR_CELL_MIGRATION		25	0.51537	1.48045	0.044586	0.360454	1	93	tags=20%, list=3%, signal=21%
GOMF_GLYCOSAMINOGLYCAN_BINDING	GOMF_GLYCOSAMINOGLYCAN_BINDING		38	0.499351	1.47866	0.034413	0.361963	1	463	tags=42%, list=17%, signal=50%
GOBP_REGULATION_OF_MULTICELLULAR_ORGANISMAL_DEVELOPMENT	GOBP_REGULATION_OF_MULTICELLULAR_ORGANISMAL_DEVELOPMENT		287	0.333489	1.47764	0	0.361528	1	465	tags=24%, list=17%, signal=26%
GOBP_REGULATION_OF_CELLULAR_RESPONSE_TO_GROWTH_FACTOR_STIMULUS	GOBP_REGULATION_OF_CELLULAR_RESPONSE_TO_GROWTH_FACTOR_STIMULUS		62	0.451171	1.47563	0.0417537	0.36405	1	294	tags=23%, list=11%, signal=25%
GOMF_HEPARIN_BINDING	GOMF_HEPARIN_BINDING		26	0.54782	1.47548	0.0447154	0.361676	1	104	tags=27%, list=4%, signal=28%
GOBP_RESPONSE_TO_VITAMIN	GOBP_RESPONSE_TO_VITAMIN		20	0.560497	1.47526	0.0292969	0.359438	1	466	tags=45%, list=17%, signal=54%
GOBP_RNA_3_END_PROCESSING	GOBP_RNA_3_END_PROCESSING		23	0.493928	1.47412	0.0626223	0.359479	1	578	tags=52%, list=21%, signal=66%
GOCC_SUPRAMOLECULAR_POLYMER	GOCC_SUPRAMOLECULAR_POLYMER		157	0.339468	1.47395	0.0162272	0.357123	1	551	tags=28%, list=20%, signal=33%
GOCC_DISTAL_AXON	GOCC_DISTAL_AXON		64	0.447482	1.46898	0.026	0.367316	1	501	tags=31%, list=18%, signal=37%
GOBP_POSITIVE_REGULATION_OF_TRANSCRIPTION_BY_RNA_POLYMERASE_II	GOBP_POSITIVE_REGULATION_OF_TRANSCRIPTION_BY_RNA_POLYMERASE_II		290	0.330951	1.4687	0.0102249	0.365213	1	438	tags=21%, list=16%, signal=22%
GOMF_TRANSCRIPTION_COREGULATOR_ACTIVITY	GOMF_TRANSCRIPTION_COREGULATOR_ACTIVITY		96	0.352721	1.46791	0.0501931	0.364374	1	609	tags=32%, list=22%, signal=40%
GOBP_MICROTUBULE_ORGANIZING_CENTER_ORGANIZATION	GOBP_MICROTUBULE_ORGANIZING_CENTER_ORGANIZATION		23	0.474691	1.46592	0.0594262	0.366642	1	790	tags=57%, list=29%, signal=79%
GOBP_VACUOLE_ORGANIZATION	GOBP_VACUOLE_ORGANIZATION		22	0.417493	1.46566	0.0857143	0.364673	1	488	tags=23%, list=18%, signal=27%
GOMF_ACTIVATING_TRANSCRIPTION_FACTOR_BINDING	GOMF_ACTIVATING_TRANSCRIPTION_FACTOR_BINDING		21	0.466094	1.46378	0.0728745	0.366876	1	521	tags=33%, list=19%, signal=41%
GOCC_NUCLEAR_ENVELOPE	GOCC_NUCLEAR_ENVELOPE		96	0.346504	1.46058	0.0197239	0.372494	1	637	tags=35%, list=23%, signal=45%
GOBP_CD4_POSITIVE_ALPHA_BETA_T_CELL_ACTIVATION	GOBP_CD4_POSITIVE_ALPHA_BETA_T_CELL_ACTIVATION		15	0.577466	1.46054	0.0452675	0.37	1	406	tags=40%, list=15%, signal=47%
GOBP_MONONUCLEAR_CELL_DIFFERENTIATION	GOBP_MONONUCLEAR_CELL_DIFFERENTIATION		79	0.390439	1.45957	0.0191939	0.369681	1	420	tags=23%, list=15%, signal=26%
GOBP_REGULATION_OF_CHROMOSOME_ORGANIZATION	GOBP_REGULATION_OF_CHROMOSOME_ORGANIZATION		58	0.396916	1.45934	0.0310078	0.367605	1	729	tags=41%, list=27%, signal=55%
GOBP_ALPHA_BETA_T_CELL_ACTIVATION	GOBP_ALPHA_BETA_T_CELL_ACTIVATION		28	0.503183	1.45884	0.036	0.366317	1	406	tags=32%, list=15%, signal=37%
GOBP_VESICLE_CYTOSKELETAL_TRAFFICKING	GOBP_VESICLE_CYTOSKELETAL_TRAFFICKING		19	0.475109	1.45517	0.0676856	0.373012	1	452	tags=26%, list=17%, signal=31%
GOBP_RETROGRADE_VESICLE_MEDIATED_TRANSPORT_GOLGI_TO_ENDOPLASMIC_RETICULUM	GOBP_RETROGRADE_VESICLE_MEDIATED_TRANSPORT_GOLGI_TO_ENDOPLASMIC_RETICULUM		15	0.53588	1.45361	0.0400844	0.374351	1	444	tags=27%, list=16%, signal=32%
GOBP_REGULATION_OF_ORGANELLE_ASSEMBLY	GOBP_REGULATION_OF_ORGANELLE_ASSEMBLY		29	0.421032	1.45185	0.0594262	0.376082	1	313	tags=24%, list=11%, signal=27%
GOBP_RESPONSE_TO_BACTERIUM	GOBP_RESPONSE_TO_BACTERIUM		96	0.368407	1.4507	0.0348162	0.376455	1	411	tags=21%, list=15%, signal=24%
GOBP_FEMALE_SEX_DIFFERENTIATION	GOBP_FEMALE_SEX_DIFFERENTIATION		24	0.481214	1.44925	0.0487805	0.377539	1	329	tags=25%, list=12%, signal=28%
GOBP_DEVELOPMENT_OF_PRIMARY_FEMALE_SEXUAL_CHARACTERISTICS	GOBP_DEVELOPMENT_OF_PRIMARY_FEMALE_SEXUAL_CHARACTERISTICS		22	0.494628	1.44885	0.0470348	0.37591	1	329	tags=27%, list=12%, signal=31%
GOBP_NUCLEAR_TRANSCRIBED_MRNA_CATABOLIC_PROCESS	GOBP_NUCLEAR_TRANSCRIBED_MRNA_CATABOLIC_PROCESS		50	0.351789	1.44834	0.140039	0.374872	1	1113	tags=66%, list=41%, signal=110%
GOBP_POSTTRANSCRIPTIONAL_REGULATION_OF_GENE_EXPRESSION	GOBP_POSTTRANSCRIPTIONAL_REGULATION_OF_GENE_EXPRESSION		112	0.311374	1.44332	0.0341365	0.384868	1	771	tags=40%, list=28%, signal=54%
GOBP_PROTEIN_DNA_COMPLEX_SUBUNIT_ORGANIZATION	GOBP_PROTEIN_DNA_COMPLEX_SUBUNIT_ORGANIZATION		36	0.3996	1.43733	0.0699029	0.397976	1	526	tags=31%, list=19%, signal=37%
GOCC_EXTERNAL_ENCAPSULATING_STRUCTURE	GOCC_EXTERNAL_ENCAPSULATING_STRUCTURE		109	0.468017	1.43727	0.0406504	0.395551	1	261	tags=24%, list=10%, signal=25%
GOBP_ADHERENS_JUNCTION_ORGANIZATION	GOBP_ADHERENS_JUNCTION_ORGANIZATION		15	0.456664	1.43567	0.0509165	0.397218	1	521	tags=40%, list=19%, signal=49%
GOBP_LYSOSOMAL_TRANSPORT	GOBP_LYSOSOMAL_TRANSPORT		22	0.513517	1.43394	0.043299	0.399177	1	488	tags=41%, list=18%, signal=49%
GOCC_LYSOSOMAL_LUMEN	GOCC_LYSOSOMAL_LUMEN		21	0.512279	1.43348	0.0531697	0.397851	1	509	tags=38%, list=19%, signal=46%
GOBP_NEGATIVE_REGULATION_OF_CELL_POPULATION_PROLIFERATION	GOBP_NEGATIVE_REGULATION_OF_CELL_POPULATION_PROLIFERATION		142	0.366544	1.43152	0.0191571	0.40074	1	338	tags=19%, list=12%, signal=21%
GOBP_POSITIVE_REGULATION_OF_CELLULAR_AMIDE_METABOLIC_PROCESS	GOBP_POSITIVE_REGULATION_OF_CELLULAR_AMIDE_METABOLIC_PROCESS		34	0.402364	1.4312	0.0479042	0.399068	1	401	tags=24%, list=15%, signal=27%
GOBP_TRANSMEMBRANE_RECEPTOR_PROTEIN_SERINE_THREONINE_KINASE_SIGNALING_PATHWAY	GOBP_TRANSMEMBRANE_RECEPTOR_PROTEIN_SERINE_THREONINE_KINASE_SIGNALING_PATHWAY		86	0.412549	1.42942	0.0325203	0.401298	1	350	tags=24%, list=13%, signal=27%
GOBP_CELLULAR_RESPONSE_TO_EXTERNAL_STIMULUS	GOBP_CELLULAR_RESPONSE_TO_EXTERNAL_STIMULUS		61	0.418822	1.42521	0.0216963	0.40981	1	382	tags=26%, list=14%, signal=30%
GOMF_GROWTH_FACTOR_RECEPTOR_BINDING	GOMF_GROWTH_FACTOR_RECEPTOR_BINDING		33	0.489783	1.42397	0.0497018	0.410555	1	406	tags=27%, list=15%, signal=32%
GOBP_CELLULAR_RESPONSE_TO_CALCIUM_ION	GOBP_CELLULAR_RESPONSE_TO_CALCIUM_ION		18	0.534422	1.42298	0.0948617	0.410604	1	493	tags=39%, list=18%, signal=47%
GOBP_IMPORT_INTO_NUCLEUS	GOBP_IMPORT_INTO_NUCLEUS		39	0.399013	1.42172	0.0766129	0.411319	1	771	tags=51%, list=28%, signal=71%
GOBP_NEGATIVE_REGULATION_OF_CELLULAR_CATABOLIC_PROCESS	GOBP_NEGATIVE_REGULATION_OF_CELLULAR_CATABOLIC_PROCESS		61	0.338674	1.42167	0.0465587	0.408946	1	363	tags=20%, list=13%, signal=22%
GOBP_NEGATIVE_REGULATION_OF_LEUKOCYTE_CELL_CELL_ADHESION	GOBP_NEGATIVE_REGULATION_OF_LEUKOCYTE_CELL_CELL_ADHESION		28	0.486731	1.42143	0.0511727	0.407162	1	93	tags=14%, list=3%, signal=15%
GOBP_NEGATIVE_REGULATION_OF_INTRACELLULAR_TRANSPORT	GOBP_NEGATIVE_REGULATION_OF_INTRACELLULAR_TRANSPORT		17	0.462298	1.41784	0.0964567	0.414058	1	340	tags=35%, list=12%, signal=40%
GOCC_CHROMOSOMAL_REGION	GOCC_CHROMOSOMAL_REGION		52	0.377274	1.41504	0.0815109	0.419508	1	750	tags=46%, list=28%, signal=62%
GOBP_T_CELL_DIFFERENTIATION	GOBP_T_CELL_DIFFERENTIATION		53	0.415967	1.41432	0.0460922	0.418833	1	420	tags=25%, list=15%, signal=28%
GOBP_REGULATION_OF_CYCLIN_DEPENDENT_PROTEIN_KINASE_ACTIVITY	GOBP_REGULATION_OF_CYCLIN_DEPENDENT_PROTEIN_KINASE_ACTIVITY		22	0.485016	1.41065	0.0745342	0.426065	1	537	tags=50%, list=20%, signal=62%
GOCC_NUCLEAR_PERIPHERY	GOCC_NUCLEAR_PERIPHERY		33	0.377847	1.41028	0.0738636	0.424605	1	560	tags=30%, list=21%, signal=38%
GOMF_HYDROLASE_ACTIVITY_ACTING_ON_ACID_ANHYDRIDES	GOMF_HYDROLASE_ACTIVITY_ACTING_ON_ACID_ANHYDRIDES		173	0.318429	1.40872	0.00400802	0.426048	1	452	tags=22%, list=17%, signal=25%
GOBP_REGULATION_OF_NOTCH_SIGNALING_PATHWAY	GOBP_REGULATION_OF_NOTCH_SIGNALING_PATHWAY		28	0.427002	1.40703	0.0936255	0.428304	1	450	tags=29%, list=17%, signal=34%
GOBP_POSITIVE_REGULATION_OF_LIPID_BIOSYNTHETIC_PROCESS	GOBP_POSITIVE_REGULATION_OF_LIPID_BIOSYNTHETIC_PROCESS		16	0.555562	1.40455	0.0474138	0.43255	1	584	tags=44%, list=21%, signal=55%
GOCC_GOLGI_APPARATUS_SUBCOMPARTMENT	GOCC_GOLGI_APPARATUS_SUBCOMPARTMENT		162	0.325186	1.3937	0.0297619	0.459736	1	545	tags=27%, list=20%, signal=31%
GOMF_EXTRACELLULAR_MATRIX_STRUCTURAL_CONSTITUENT	GOMF_EXTRACELLULAR_MATRIX_STRUCTURAL_CONSTITUENT		34	0.565516	1.38659	0.101031	0.477753	1	250	tags=35%, list=9%, signal=38%
GOBP_DEFENSE_RESPONSE_TO_BACTERIUM	GOBP_DEFENSE_RESPONSE_TO_BACTERIUM		26	0.473306	1.386	0.112167	0.476857	1	485	tags=27%, list=18%, signal=32%
GOBP_REGULATION_OF_CELL_DIFFERENTIATION	GOBP_REGULATION_OF_CELL_DIFFERENTIATION		339	0.303766	1.38565	0.00606061	0.475244	1	438	tags=22%, list=16%, signal=23%
GOBP_LEUKOCYTE_DIFFERENTIATION	GOBP_LEUKOCYTE_DIFFERENTIATION		101	0.349786	1.38165	0.0465116	0.484708	1	420	tags=22%, list=15%, signal=25%
GOCC_NUCLEAR_PORE	GOCC_NUCLEAR_PORE		17	0.477873	1.37974	0.1341	0.487809	1	340	tags=35%, list=12%, signal=40%
GOBP_POSITIVE_REGULATION_OF_TRANSLATION	GOBP_POSITIVE_REGULATION_OF_TRANSLATION		28	0.39864	1.3785	0.0923379	0.488895	1	401	tags=25%, list=15%, signal=29%
GOBP_POSITIVE_REGULATION_OF_FAT_CELL_DIFFERENTIATION	GOBP_POSITIVE_REGULATION_OF_FAT_CELL_DIFFERENTIATION		16	0.539091	1.37745	0.0914397	0.489133	1	437	tags=31%, list=16%, signal=37%
GOMF_ACTIN_BINDING	GOMF_ACTIN_BINDING		106	0.342813	1.37464	0.0331263	0.494564	1	555	tags=28%, list=20%, signal=34%
GOBP_INTRACELLULAR_STEROID_HORMONE_RECEPTOR_SIGNALING_PATHWAY	GOBP_INTRACELLULAR_STEROID_HORMONE_RECEPTOR_SIGNALING_PATHWAY		22	0.435179	1.37422	0.0769231	0.493183	1	238	tags=18%, list=9%, signal=20%
GOBP_TRANSFORMING_GROWTH_FACTOR_BETA_RECEPTOR_SIGNALING_PATHWAY	GOBP_TRANSFORMING_GROWTH_FACTOR_BETA_RECEPTOR_SIGNALING_PATHWAY		53	0.425152	1.37283	0.0793651	0.494393	1	350	tags=26%, list=13%, signal=30%
GOBP_REGULATION_OF_TRANSMEMBRANE_RECEPTOR_PROTEIN_SERINE_THREONINE_KINASE_SIGNALING_PATHWAY	GOBP_REGULATION_OF_TRANSMEMBRANE_RECEPTOR_PROTEIN_SERINE_THREONINE_KINASE_SIGNALING_PATHWAY		56	0.416505	1.37169	0.0829876	0.495346	1	331	tags=23%, list=12%, signal=26%
GOBP_NUCLEAR_TRANSCRIBED_MRNA_CATABOLIC_PROCESS_NONSENSE_MEDIATED_DECAY	GOBP_NUCLEAR_TRANSCRIBED_MRNA_CATABOLIC_PROCESS_NONSENSE_MEDIATED_DECAY		39	0.36137	1.37152	0.156823	0.493164	1	1104	tags=69%, list=41%, signal=115%
GOBP_MONOAMINE_TRANSPORT	GOBP_MONOAMINE_TRANSPORT		19	0.483577	1.37065	0.100205	0.492888	1	485	tags=32%, list=18%, signal=38%
GOBP_REGULATION_OF_CELL_CYCLE_G1_S_PHASE_TRANSITION	GOBP_REGULATION_OF_CELL_CYCLE_G1_S_PHASE_TRANSITION		35	0.406268	1.36907	0.0745968	0.495024	1	512	tags=37%, list=19%, signal=45%
GOBP_NEGATIVE_REGULATION_OF_CATABOLIC_PROCESS	GOBP_NEGATIVE_REGULATION_OF_CATABOLIC_PROCESS		73	0.320148	1.36644	0.0494845	0.500489	1	363	tags=19%, list=13%, signal=22%
GOBP_REGULATION_OF_PLASMA_LIPOPROTEIN_PARTICLE_LEVELS	GOBP_REGULATION_OF_PLASMA_LIPOPROTEIN_PARTICLE_LEVELS		16	0.504903	1.36444	0.0934394	0.504103	1	300	tags=31%, list=11%, signal=35%
GOBP_CHROMATIN_ORGANIZATION_INVOLVED_IN_REGULATION_OF_TRANSCRIPTION	GOBP_CHROMATIN_ORGANIZATION_INVOLVED_IN_REGULATION_OF_TRANSCRIPTION		17	0.460496	1.362	0.132692	0.50885	1	916	tags=65%, list=34%, signal=97%
GOBP_REGULATION_OF_PEPTIDYL_TYROSINE_PHOSPHORYLATION	GOBP_REGULATION_OF_PEPTIDYL_TYROSINE_PHOSPHORYLATION		54	0.369467	1.36186	0.0561555	0.506718	1	437	tags=28%, list=16%, signal=32%
GOBP_OLEFINIC_COMPOUND_METABOLIC_PROCESS	GOBP_OLEFINIC_COMPOUND_METABOLIC_PROCESS		17	0.497096	1.3614	0.0767591	0.505626	1	667	tags=53%, list=24%, signal=70%
GOBP_CELLULAR_BIOGENIC_AMINE_METABOLIC_PROCESS	GOBP_CELLULAR_BIOGENIC_AMINE_METABOLIC_PROCESS		18	0.500186	1.36129	0.103922	0.503409	1	447	tags=28%, list=16%, signal=33%
GOCC_RIBONUCLEOPROTEIN_GRANULE	GOCC_RIBONUCLEOPROTEIN_GRANULE		53	0.361728	1.35987	0.0890269	0.505009	1	760	tags=42%, list=28%, signal=56%
GOBP_REGULATION_OF_CELLULAR_RESPONSE_TO_TRANSFORMING_GROWTH_FACTOR_BETA_STIMULUS	GOBP_REGULATION_OF_CELLULAR_RESPONSE_TO_TRANSFORMING_GROWTH_FACTOR_BETA_STIMULUS		30	0.453399	1.35744	0.113821	0.509746	1	294	tags=23%, list=11%, signal=26%
GOCC_PHAGOCYTIC_VESICLE	GOCC_PHAGOCYTIC_VESICLE		33	0.417894	1.35726	0.106061	0.507738	1	739	tags=48%, list=27%, signal=66%
GOBP_NEGATIVE_REGULATION_OF_CELLULAR_RESPONSE_TO_GROWTH_FACTOR_STIMULUS	GOBP_NEGATIVE_REGULATION_OF_CELLULAR_RESPONSE_TO_GROWTH_FACTOR_STIMULUS		25	0.496341	1.35679	0.106776	0.506477	1	203	tags=20%, list=7%, signal=21%
GOBP_DEVELOPMENT_OF_PRIMARY_SEXUAL_CHARACTERISTICS	GOBP_DEVELOPMENT_OF_PRIMARY_SEXUAL_CHARACTERISTICS		48	0.391327	1.35619	0.0481928	0.505959	1	329	tags=25%, list=12%, signal=28%
GOBP_ORGANIC_HYDROXY_COMPOUND_TRANSPORT	GOBP_ORGANIC_HYDROXY_COMPOUND_TRANSPORT		52	0.395115	1.35535	0.0669371	0.505919	1	328	tags=21%, list=12%, signal=24%
GOBP_REGULATION_OF_GTPASE_ACTIVITY	GOBP_REGULATION_OF_GTPASE_ACTIVITY		96	0.343581	1.3551	0.0390144	0.504163	1	327	tags=22%, list=12%, signal=24%
GOMF_TRANSMEMBRANE_RECEPTOR_PROTEIN_KINASE_ACTIVITY	GOMF_TRANSMEMBRANE_RECEPTOR_PROTEIN_KINASE_ACTIVITY		30	0.472695	1.3545	0.0949612	0.503361	1	311	tags=27%, list=11%, signal=30%
GOBP_RRNA_METABOLIC_PROCESS	GOBP_RRNA_METABOLIC_PROCESS		41	0.326476	1.35303	0.106719	0.505664	1	453	tags=20%, list=17%, signal=23%
GOBP_SKELETAL_SYSTEM_MORPHOGENESIS	GOBP_SKELETAL_SYSTEM_MORPHOGENESIS		50	0.38195	1.35187	0.08413	0.506536	1	332	tags=22%, list=12%, signal=25%
GOBP_EPITHELIAL_TO_MESENCHYMAL_TRANSITION	GOBP_EPITHELIAL_TO_MESENCHYMAL_TRANSITION		33	0.45648	1.35181	0.0756646	0.504239	1	125	tags=15%, list=5%, signal=16%
GOBP_POSITIVE_REGULATION_OF_NUCLEOCYTOPLASMIC_TRANSPORT	GOBP_POSITIVE_REGULATION_OF_NUCLEOCYTOPLASMIC_TRANSPORT		17	0.472651	1.35146	0.124236	0.502983	1	697	tags=53%, list=26%, signal=71%
GOBP_NCRNA_TRANSCRIPTION	GOBP_NCRNA_TRANSCRIPTION		22	0.46292	1.34895	0.116183	0.508002	1	691	tags=50%, list=25%, signal=66%
GOBP_NOTCH_SIGNALING_PATHWAY	GOBP_NOTCH_SIGNALING_PATHWAY		44	0.374018	1.3489	0.0939335	0.505807	1	511	tags=30%, list=19%, signal=36%
GOBP_REACTIVE_NITROGEN_SPECIES_METABOLIC_PROCESS	GOBP_REACTIVE_NITROGEN_SPECIES_METABOLIC_PROCESS		15	0.53036	1.34825	0.120724	0.505335	1	411	tags=40%, list=15%, signal=47%
GOBP_REGULATION_OF_MRNA_CATABOLIC_PROCESS	GOBP_REGULATION_OF_MRNA_CATABOLIC_PROCESS		38	0.352483	1.34725	0.153191	0.505892	1	807	tags=39%, list=30%, signal=55%
GOBP_NEGATIVE_REGULATION_OF_CELL_SUBSTRATE_ADHESION	GOBP_NEGATIVE_REGULATION_OF_CELL_SUBSTRATE_ADHESION		22	0.460571	1.34613	0.0882353	0.506734	1	297	tags=32%, list=11%, signal=35%
GOBP_B_CELL_DIFFERENTIATION	GOBP_B_CELL_DIFFERENTIATION		26	0.427435	1.34596	0.0787879	0.504897	1	420	tags=27%, list=15%, signal=32%
GOCC_VACUOLAR_LUMEN	GOCC_VACUOLAR_LUMEN		31	0.437574	1.34467	0.0912698	0.506521	1	509	tags=32%, list=19%, signal=39%
GOMF_CALMODULIN_BINDING	GOMF_CALMODULIN_BINDING		57	0.373289	1.34383	0.0649895	0.506746	1	603	tags=37%, list=22%, signal=46%
GOMF_DRUG_BINDING	GOMF_DRUG_BINDING		16	0.508333	1.34313	0.104	0.506324	1	422	tags=38%, list=15%, signal=44%
GOBP_CELL_SUBSTRATE_JUNCTION_ORGANIZATION	GOBP_CELL_SUBSTRATE_JUNCTION_ORGANIZATION		31	0.446852	1.34196	0.0809129	0.507497	1	365	tags=26%, list=13%, signal=29%
GOMF_SINGLE_STRANDED_RNA_BINDING	GOMF_SINGLE_STRANDED_RNA_BINDING		22	0.446544	1.3415	0.143434	0.50664	1	660	tags=50%, list=24%, signal=65%
GOCC_FICOLIN_1_RICH_GRANULE	GOCC_FICOLIN_1_RICH_GRANULE		36	0.39927	1.34139	0.12749	0.504626	1	445	tags=31%, list=16%, signal=36%
GOMF_CARBOHYDRATE_BINDING	GOMF_CARBOHYDRATE_BINDING		29	0.427395	1.34103	0.096	0.503422	1	352	tags=21%, list=13%, signal=24%
GOBP_RESPONSE_TO_DRUG	GOBP_RESPONSE_TO_DRUG		90	0.32915	1.33952	0.0429448	0.505708	1	543	tags=30%, list=20%, signal=36%
GOBP_TELOMERE_ORGANIZATION	GOBP_TELOMERE_ORGANIZATION		28	0.42338	1.33914	0.11546	0.504578	1	686	tags=43%, list=25%, signal=57%
GOBP_BONE_DEVELOPMENT	GOBP_BONE_DEVELOPMENT		42	0.400181	1.33477	0.0693878	0.515187	1	398	tags=33%, list=15%, signal=38%
GOBP_HOMEOSTASIS_OF_NUMBER_OF_CELLS	GOBP_HOMEOSTASIS_OF_NUMBER_OF_CELLS		54	0.372778	1.33367	0.0755102	0.515984	1	395	tags=24%, list=15%, signal=28%
GOBP_ERYTHROCYTE_HOMEOSTASIS	GOBP_ERYTHROCYTE_HOMEOSTASIS		29	0.434383	1.33361	0.0838207	0.51389	1	395	tags=24%, list=15%, signal=28%
GOCC_GOLGI_APPARATUS	GOCC_GOLGI_APPARATUS		292	0.288374	1.333	0.0209205	0.513377	1	536	tags=24%, list=20%, signal=26%
GOCC_COLLAGEN_CONTAINING_EXTRACELLULAR_MATRIX	GOCC_COLLAGEN_CONTAINING_EXTRACELLULAR_MATRIX		88	0.447849	1.33283	0.0914634	0.511575	1	261	tags=24%, list=10%, signal=26%
GOBP_PEPTIDYL_LYSINE_MODIFICATION	GOBP_PEPTIDYL_LYSINE_MODIFICATION		71	0.341117	1.33275	0.109312	0.509624	1	648	tags=32%, list=24%, signal=41%
GOBP_REGULATION_OF_CELL_SHAPE	GOBP_REGULATION_OF_CELL_SHAPE		27	0.409359	1.33187	0.111789	0.509937	1	413	tags=26%, list=15%, signal=30%
GOBP_CELL_CELL_ADHESION_VIA_PLASMA_MEMBRANE_ADHESION_MOLECULES	GOBP_CELL_CELL_ADHESION_VIA_PLASMA_MEMBRANE_ADHESION_MOLECULES		39	0.403555	1.33077	0.0855397	0.511167	1	330	tags=18%, list=12%, signal=20%
GOBP_REGULATION_OF_CHONDROCYTE_DIFFERENTIATION	GOBP_REGULATION_OF_CHONDROCYTE_DIFFERENTIATION		16	0.520931	1.33075	0.132554	0.509055	1	311	tags=31%, list=11%, signal=35%
GOBP_NEGATIVE_REGULATION_OF_CELL_ACTIVATION	GOBP_NEGATIVE_REGULATION_OF_CELL_ACTIVATION		41	0.419721	1.32974	0.112224	0.5097	1	93	tags=12%, list=3%, signal=12%
GOBP_SEX_DIFFERENTIATION	GOBP_SEX_DIFFERENTIATION		58	0.370153	1.32821	0.052	0.511868	1	329	tags=22%, list=12%, signal=25%
GOBP_NEGATIVE_REGULATION_OF_DEVELOPMENTAL_PROCESS	GOBP_NEGATIVE_REGULATION_OF_DEVELOPMENTAL_PROCESS		194	0.312501	1.32705	0.0195312	0.513202	1	449	tags=23%, list=16%, signal=26%
GOBP_CHROMATIN_REMODELING	GOBP_CHROMATIN_REMODELING		32	0.378529	1.32687	0.118896	0.511604	1	691	tags=34%, list=25%, signal=46%
GOBP_REGULATION_OF_LEUKOCYTE_MIGRATION	GOBP_REGULATION_OF_LEUKOCYTE_MIGRATION		26	0.468822	1.32641	0.122881	0.510801	1	411	tags=31%, list=15%, signal=36%
GOBP_MAINTENANCE_OF_PROTEIN_LOCATION	GOBP_MAINTENANCE_OF_PROTEIN_LOCATION		16	0.498426	1.32639	0.158635	0.508752	1	328	tags=31%, list=12%, signal=35%
GOBP_REGULATION_OF_CELL_SUBSTRATE_ADHESION	GOBP_REGULATION_OF_CELL_SUBSTRATE_ADHESION		56	0.386848	1.32546	0.0677291	0.509146	1	297	tags=21%, list=11%, signal=24%
GOBP_RESPONSE_TO_STEROID_HORMONE	GOBP_RESPONSE_TO_STEROID_HORMONE		66	0.346027	1.3241	0.0800866	0.510772	1	420	tags=23%, list=15%, signal=26%
GOBP_BIOLOGICAL_PROCESS_INVOLVED_IN_SYMBIOTIC_INTERACTION	GOBP_BIOLOGICAL_PROCESS_INVOLVED_IN_SYMBIOTIC_INTERACTION		211	0.248785	1.32193	0.0692884	0.514999	1	788	tags=36%, list=29%, signal=46%
GOBP_RESPONSE_TO_TRANSFORMING_GROWTH_FACTOR_BETA	GOBP_RESPONSE_TO_TRANSFORMING_GROWTH_FACTOR_BETA		73	0.400963	1.32088	0.0802469	0.516043	1	433	tags=27%, list=16%, signal=32%
GOCC_CENTRIOLAR_SATELLITE	GOCC_CENTRIOLAR_SATELLITE		15	0.487365	1.32049	0.130879	0.515222	1	399	tags=33%, list=15%, signal=39%
GOMF_TRANSCRIPTION_REGULATOR_ACTIVITY	GOMF_TRANSCRIPTION_REGULATOR_ACTIVITY		355	0.301903	1.31968	0.0501931	0.515513	1	598	tags=26%, list=22%, signal=30%
GOBP_NEGATIVE_REGULATION_OF_PHOSPHORYLATION	GOBP_NEGATIVE_REGULATION_OF_PHOSPHORYLATION		75	0.312513	1.31769	0.0563674	0.519394	1	465	tags=24%, list=17%, signal=28%
GOCC_FICOLIN_1_RICH_GRANULE_LUMEN	GOCC_FICOLIN_1_RICH_GRANULE_LUMEN		29	0.416588	1.31711	0.15493	0.51917	1	445	tags=31%, list=16%, signal=37%
GOBP_REGULATION_OF_MITOTIC_CELL_CYCLE	GOBP_REGULATION_OF_MITOTIC_CELL_CYCLE		105	0.315461	1.3171	0.0722656	0.517089	1	521	tags=31%, list=19%, signal=37%
GOMF_CIS_REGULATORY_REGION_SEQUENCE_SPECIFIC_DNA_BINDING	GOMF_CIS_REGULATORY_REGION_SEQUENCE_SPECIFIC_DNA_BINDING		240	0.317901	1.31393	0.0516899	0.52446	1	482	tags=22%, list=18%, signal=24%
GOBP_NUCLEOTIDE_EXCISION_REPAIR	GOBP_NUCLEOTIDE_EXCISION_REPAIR		27	0.406199	1.31218	0.132653	0.527715	1	422	tags=26%, list=15%, signal=30%
GOBP_REGULATION_OF_CELL_JUNCTION_ASSEMBLY	GOBP_REGULATION_OF_CELL_JUNCTION_ASSEMBLY		54	0.388658	1.31131	0.0681363	0.528241	1	271	tags=17%, list=10%, signal=18%
GOBP_REGULATION_OF_CELL_CYCLE_PROCESS	GOBP_REGULATION_OF_CELL_CYCLE_PROCESS		139	0.298992	1.31017	0.0567515	0.529571	1	521	tags=27%, list=19%, signal=32%
GOBP_POSITIVE_REGULATION_OF_DEVELOPMENTAL_PROCESS	GOBP_POSITIVE_REGULATION_OF_DEVELOPMENTAL_PROCESS		271	0.296034	1.30845	0.0198413	0.532868	1	464	tags=23%, list=17%, signal=24%
GOBP_MUSCLE_TISSUE_DEVELOPMENT	GOBP_MUSCLE_TISSUE_DEVELOPMENT		84	0.359537	1.3078	0.0621242	0.532704	1	463	tags=26%, list=17%, signal=31%
GOCC_ENDOPLASMIC_RETICULUM_LUMEN	GOCC_ENDOPLASMIC_RETICULUM_LUMEN		53	0.436209	1.30715	0.105469	0.532466	1	411	tags=28%, list=15%, signal=33%
GOBP_POSITIVE_REGULATION_OF_TRANSMEMBRANE_RECEPTOR_PROTEIN_SERINE_THREONINE_KINASE_SIGNALING_PATHWAY	GOBP_POSITIVE_REGULATION_OF_TRANSMEMBRANE_RECEPTOR_PROTEIN_SERINE_THREONINE_KINASE_SIGNALING_PATHWAY		27	0.445334	1.30697	0.116959	0.530913	1	481	tags=33%, list=18%, signal=40%
GOCC_ENDOSOME_MEMBRANE	GOCC_ENDOSOME_MEMBRANE		109	0.330286	1.30633	0.0901804	0.530823	1	517	tags=29%, list=19%, signal=35%
GOBP_REGULATION_OF_ADAPTIVE_IMMUNE_RESPONSE	GOBP_REGULATION_OF_ADAPTIVE_IMMUNE_RESPONSE		23	0.419379	1.30528	0.150495	0.53178	1	116	tags=17%, list=4%, signal=18%
GOBP_POSITIVE_REGULATION_OF_GTPASE_ACTIVITY	GOBP_POSITIVE_REGULATION_OF_GTPASE_ACTIVITY		76	0.338084	1.3045	0.0714286	0.532118	1	327	tags=22%, list=12%, signal=25%
GOBP_REGULATION_OF_INTRACELLULAR_TRANSPORT	GOBP_REGULATION_OF_INTRACELLULAR_TRANSPORT		86	0.296025	1.30341	0.104743	0.533258	1	454	tags=24%, list=17%, signal=28%
GOMF_RECEPTOR_REGULATOR_ACTIVITY	GOMF_RECEPTOR_REGULATOR_ACTIVITY		66	0.398356	1.30297	0.0848861	0.532437	1	147	tags=18%, list=5%, signal=19%
GOMF_ACTIN_FILAMENT_BINDING	GOMF_ACTIN_FILAMENT_BINDING		49	0.382321	1.30053	0.109312	0.53759	1	530	tags=29%, list=19%, signal=35%
GOBP_CALCIUM_MEDIATED_SIGNALING	GOBP_CALCIUM_MEDIATED_SIGNALING		37	0.423066	1.29975	0.0896686	0.537831	1	612	tags=43%, list=22%, signal=55%
GOBP_REGULATION_OF_PROTEIN_BINDING	GOBP_REGULATION_OF_PROTEIN_BINDING		53	0.343317	1.29877	0.104418	0.538688	1	713	tags=38%, list=26%, signal=50%
GOBP_VACUOLAR_TRANSPORT	GOBP_VACUOLAR_TRANSPORT		27	0.426428	1.29772	0.162933	0.5396	1	488	tags=37%, list=18%, signal=45%
GOBP_ANIMAL_ORGAN_MORPHOGENESIS	GOBP_ANIMAL_ORGAN_MORPHOGENESIS		224	0.307685	1.29649	0.0509165	0.541232	1	463	tags=22%, list=17%, signal=25%
GOMF_GTPASE_BINDING	GOMF_GTPASE_BINDING		44	0.37177	1.29543	0.112245	0.54255	1	454	tags=30%, list=17%, signal=35%
GOCC_NUCLEAR_MEMBRANE	GOCC_NUCLEAR_MEMBRANE		58	0.356906	1.29432	0.104743	0.543908	1	637	tags=41%, list=23%, signal=53%
GOBP_PEPTIDYL_TYROSINE_MODIFICATION	GOBP_PEPTIDYL_TYROSINE_MODIFICATION		86	0.333952	1.29414	0.0887097	0.54242	1	437	tags=22%, list=16%, signal=25%
GOBP_STEROID_HORMONE_MEDIATED_SIGNALING_PATHWAY	GOBP_STEROID_HORMONE_MEDIATED_SIGNALING_PATHWAY		28	0.378202	1.29209	0.102713	0.546133	1	238	tags=14%, list=9%, signal=15%
GOBP_DNA_GEOMETRIC_CHANGE	GOBP_DNA_GEOMETRIC_CHANGE		27	0.395754	1.29209	0.148	0.544103	1	623	tags=26%, list=23%, signal=33%
GOBP_CELLULAR_RESPONSE_TO_STEROID_HORMONE_STIMULUS	GOBP_CELLULAR_RESPONSE_TO_STEROID_HORMONE_STIMULUS		44	0.349018	1.29141	0.117647	0.544086	1	420	tags=20%, list=15%, signal=24%
GOMF_DNA_BINDING_TRANSCRIPTION_ACTIVATOR_ACTIVITY	GOMF_DNA_BINDING_TRANSCRIPTION_ACTIVATOR_ACTIVITY		117	0.316446	1.29002	0.0722892	0.54629	1	498	tags=22%, list=18%, signal=26%
GOBP_CARTILAGE_DEVELOPMENT	GOBP_CARTILAGE_DEVELOPMENT		50	0.412759	1.28984	0.0890688	0.544834	1	493	tags=30%, list=18%, signal=36%
GOCC_CORTICAL_CYTOSKELETON	GOCC_CORTICAL_CYTOSKELETON		30	0.38295	1.28942	0.108511	0.544001	1	690	tags=27%, list=25%, signal=35%
GOBP_INTRACELLULAR_RECEPTOR_SIGNALING_PATHWAY	GOBP_INTRACELLULAR_RECEPTOR_SIGNALING_PATHWAY		63	0.348747	1.28919	0.10297	0.542776	1	363	tags=21%, list=13%, signal=23%
GOBP_NEGATIVE_REGULATION_OF_CELL_CYCLE_PROCESS	GOBP_NEGATIVE_REGULATION_OF_CELL_CYCLE_PROCESS		67	0.329835	1.28869	0.0945946	0.542172	1	512	tags=31%, list=19%, signal=38%
GOBP_SPINDLE_LOCALIZATION	GOBP_SPINDLE_LOCALIZATION		17	0.427483	1.28869	0.176829	0.540217	1	742	tags=35%, list=27%, signal=48%
GOBP_POST_EMBRYONIC_DEVELOPMENT	GOBP_POST_EMBRYONIC_DEVELOPMENT		22	0.42262	1.28855	0.147436	0.538654	1	140	tags=14%, list=5%, signal=14%
GOBP_REGULATION_OF_CELLULAR_AMIDE_METABOLIC_PROCESS	GOBP_REGULATION_OF_CELLULAR_AMIDE_METABOLIC_PROCESS		84	0.310262	1.28603	0.105578	0.544058	1	550	tags=30%, list=20%, signal=36%
GOBP_REGULATION_OF_SMALL_GTPASE_MEDIATED_SIGNAL_TRANSDUCTION	GOBP_REGULATION_OF_SMALL_GTPASE_MEDIATED_SIGNAL_TRANSDUCTION		72	0.333649	1.28568	0.0879828	0.543258	1	732	tags=39%, list=27%, signal=52%
GOBP_REGULATION_OF_CARBOHYDRATE_CATABOLIC_PROCESS	GOBP_REGULATION_OF_CARBOHYDRATE_CATABOLIC_PROCESS		30	0.407699	1.28397	0.127168	0.546571	1	437	tags=43%, list=16%, signal=51%
GOBP_MITOTIC_SISTER_CHROMATID_SEGREGATION	GOBP_MITOTIC_SISTER_CHROMATID_SEGREGATION		24	0.425451	1.28317	0.152305	0.546957	1	510	tags=38%, list=19%, signal=46%
GOBP_CELL_JUNCTION_ASSEMBLY	GOBP_CELL_JUNCTION_ASSEMBLY		108	0.315513	1.28156	0.0595483	0.54969	1	365	tags=18%, list=13%, signal=20%
GOBP_CELL_POPULATION_PROLIFERATION	GOBP_CELL_POPULATION_PROLIFERATION		374	0.300587	1.27971	0.038	0.553323	1	521	tags=25%, list=19%, signal=26%
GOBP_GLOMERULUS_DEVELOPMENT	GOBP_GLOMERULUS_DEVELOPMENT		15	0.52076	1.2778	0.165657	0.556988	1	551	tags=47%, list=20%, signal=58%
GOBP_STRIATED_MUSCLE_CELL_PROLIFERATION	GOBP_STRIATED_MUSCLE_CELL_PROLIFERATION		25	0.425329	1.27772	0.158491	0.555319	1	388	tags=20%, list=14%, signal=23%
GOBP_REGULATION_OF_CARDIAC_MUSCLE_CELL_PROLIFERATION	GOBP_REGULATION_OF_CARDIAC_MUSCLE_CELL_PROLIFERATION		16	0.466002	1.27746	0.174168	0.554217	1	248	tags=19%, list=9%, signal=21%
GOMF_SULFUR_COMPOUND_BINDING	GOMF_SULFUR_COMPOUND_BINDING		46	0.406748	1.27688	0.128049	0.554037	1	463	tags=35%, list=17%, signal=41%
GOBP_PROTEIN_CONTAINING_COMPLEX_LOCALIZATION	GOBP_PROTEIN_CONTAINING_COMPLEX_LOCALIZATION		54	0.334856	1.27638	0.144531	0.553644	1	659	tags=37%, list=24%, signal=48%
GOBP_VESICLE_TRANSPORT_ALONG_MICROTUBULE	GOBP_VESICLE_TRANSPORT_ALONG_MICROTUBULE		15	0.457544	1.27615	0.2	0.552359	1	441	tags=27%, list=16%, signal=32%
GOBP_POSITIVE_REGULATION_OF_PROTEIN_MODIFICATION_BY_SMALL_PROTEIN_CONJUGATION_OR_REMOVAL	GOBP_POSITIVE_REGULATION_OF_PROTEIN_MODIFICATION_BY_SMALL_PROTEIN_CONJUGATION_OR_REMOVAL		31	0.363215	1.27492	0.158317	0.554066	1	103	tags=13%, list=4%, signal=13%
GOBP_RESPONSE_TO_GROWTH_FACTOR	GOBP_RESPONSE_TO_GROWTH_FACTOR		180	0.326227	1.2734	0.0627615	0.556705	1	455	tags=23%, list=17%, signal=26%
GOCC_LATE_ENDOSOME_MEMBRANE	GOCC_LATE_ENDOSOME_MEMBRANE		24	0.446604	1.27316	0.163265	0.555585	1	488	tags=38%, list=18%, signal=45%
GOMF_EPIDERMAL_GROWTH_FACTOR_RECEPTOR_BINDING	GOMF_EPIDERMAL_GROWTH_FACTOR_RECEPTOR_BINDING		15	0.482938	1.27278	0.176817	0.554666	1	221	tags=13%, list=8%, signal=14%
GOBP_MYOBLAST_DIFFERENTIATION	GOBP_MYOBLAST_DIFFERENTIATION		15	0.472428	1.27238	0.177966	0.553939	1	46	tags=13%, list=2%, signal=13%
GOBP_HISTONE_METHYLATION	GOBP_HISTONE_METHYLATION		19	0.442011	1.272	0.176238	0.553226	1	521	tags=32%, list=19%, signal=39%
GOBP_MICROTUBULE_CYTOSKELETON_ORGANIZATION_INVOLVED_IN_MITOSIS	GOBP_MICROTUBULE_CYTOSKELETON_ORGANIZATION_INVOLVED_IN_MITOSIS		27	0.390893	1.27098	0.173077	0.554276	1	742	tags=52%, list=27%, signal=71%
GOBP_HUMORAL_IMMUNE_RESPONSE	GOBP_HUMORAL_IMMUNE_RESPONSE		19	0.428187	1.26965	0.160896	0.55635	1	248	tags=16%, list=9%, signal=17%
GOBP_REGENERATION	GOBP_REGENERATION		41	0.348625	1.26861	0.124224	0.557631	1	455	tags=29%, list=17%, signal=35%
GOBP_VENTRICULAR_SEPTUM_MORPHOGENESIS	GOBP_VENTRICULAR_SEPTUM_MORPHOGENESIS		15	0.517706	1.26822	0.180747	0.556961	1	219	tags=27%, list=8%, signal=29%
GOBP_REGULATION_OF_NUCLEOTIDE_METABOLIC_PROCESS	GOBP_REGULATION_OF_NUCLEOTIDE_METABOLIC_PROCESS		36	0.420702	1.26621	0.104628	0.561113	1	437	tags=39%, list=16%, signal=46%
GOBP_RESPONSE_TO_OXYGEN_LEVELS	GOBP_RESPONSE_TO_OXYGEN_LEVELS		86	0.3268	1.26517	0.0784708	0.56234	1	466	tags=26%, list=17%, signal=30%
GOBP_EPIDERMAL_CELL_DIFFERENTIATION	GOBP_EPIDERMAL_CELL_DIFFERENTIATION		41	0.359919	1.26382	0.124498	0.564367	1	248	tags=20%, list=9%, signal=21%
GOCC_PHAGOCYTIC_VESICLE_MEMBRANE	GOCC_PHAGOCYTIC_VESICLE_MEMBRANE		17	0.483081	1.26257	0.189091	0.566103	1	715	tags=53%, list=26%, signal=71%
GOBP_CELLULAR_RESPONSE_TO_INORGANIC_SUBSTANCE	GOBP_CELLULAR_RESPONSE_TO_INORGANIC_SUBSTANCE		51	0.32485	1.26239	0.147475	0.564842	1	679	tags=33%, list=25%, signal=44%
GOMF_SEQUENCE_SPECIFIC_DNA_BINDING	GOMF_SEQUENCE_SPECIFIC_DNA_BINDING		313	0.290778	1.26217	0.0917969	0.563675	1	598	tags=25%, list=22%, signal=28%
GOMF_STRUCTURAL_MOLECULE_ACTIVITY	GOMF_STRUCTURAL_MOLECULE_ACTIVITY		153	0.299029	1.26112	0.116564	0.564992	1	597	tags=30%, list=22%, signal=36%
GOBP_REGULATION_OF_OXIDATIVE_STRESS_INDUCED_CELL_DEATH	GOBP_REGULATION_OF_OXIDATIVE_STRESS_INDUCED_CELL_DEATH		15	0.443728	1.26017	0.215238	0.566148	1	773	tags=47%, list=28%, signal=65%
GOMF_LIPID_TRANSPORTER_ACTIVITY	GOMF_LIPID_TRANSPORTER_ACTIVITY		32	0.418913	1.25835	0.144989	0.569802	1	379	tags=25%, list=14%, signal=29%
GOBP_CARDIAC_CHAMBER_MORPHOGENESIS	GOBP_CARDIAC_CHAMBER_MORPHOGENESIS		31	0.411295	1.25713	0.139165	0.571444	1	463	tags=29%, list=17%, signal=35%
GOBP_REPRODUCTIVE_SYSTEM_DEVELOPMENT	GOBP_REPRODUCTIVE_SYSTEM_DEVELOPMENT		92	0.305916	1.25699	0.0823045	0.570091	1	329	tags=20%, list=12%, signal=22%
GOCC_ENDOSOME	GOCC_ENDOSOME		190	0.27155	1.2555	0.0657371	0.572814	1	518	tags=24%, list=19%, signal=27%
GOBP_EXTERNAL_ENCAPSULATING_STRUCTURE_ORGANIZATION	GOBP_EXTERNAL_ENCAPSULATING_STRUCTURE_ORGANIZATION		80	0.37501	1.25459	0.117284	0.573638	1	463	tags=24%, list=17%, signal=28%
GOBP_NEGATIVE_REGULATION_OF_IMMUNE_SYSTEM_PROCESS	GOBP_NEGATIVE_REGULATION_OF_IMMUNE_SYSTEM_PROCESS		77	0.35024	1.2541	0.13834	0.573212	1	485	tags=19%, list=18%, signal=23%
GOBP_HISTONE_DEACETYLATION	GOBP_HISTONE_DEACETYLATION		19	0.441481	1.25401	0.177143	0.571595	1	131	tags=21%, list=5%, signal=22%
GOCC_AXON	GOCC_AXON		148	0.302345	1.25385	0.0767635	0.570274	1	501	tags=24%, list=18%, signal=27%
GOBP_MUSCLE_CELL_DIFFERENTIATION	GOBP_MUSCLE_CELL_DIFFERENTIATION		84	0.310444	1.25374	0.0828402	0.568811	1	584	tags=36%, list=21%, signal=44%
GOBP_CELL_CYCLE_PHASE_TRANSITION	GOBP_CELL_CYCLE_PHASE_TRANSITION		117	0.278803	1.25295	0.125	0.569382	1	512	tags=26%, list=19%, signal=31%
GOMF_CALCIUM_ION_BINDING	GOMF_CALCIUM_ION_BINDING		115	0.339912	1.25283	0.121704	0.567914	1	313	tags=18%, list=11%, signal=20%
GOBP_SMALL_GTPASE_MEDIATED_SIGNAL_TRANSDUCTION	GOBP_SMALL_GTPASE_MEDIATED_SIGNAL_TRANSDUCTION		115	0.305295	1.25214	0.0995671	0.568206	1	624	tags=30%, list=23%, signal=37%
GOCC_VACUOLE	GOCC_VACUOLE		144	0.300102	1.25117	0.0966387	0.569288	1	517	tags=26%, list=19%, signal=30%
GOBP_CARDIAC_SEPTUM_MORPHOGENESIS	GOBP_CARDIAC_SEPTUM_MORPHOGENESIS		24	0.432024	1.25072	0.167653	0.568789	1	248	tags=21%, list=9%, signal=23%
GOBP_RESPONSE_TO_BMP	GOBP_RESPONSE_TO_BMP		45	0.417634	1.25041	0.134122	0.567991	1	311	tags=22%, list=11%, signal=25%
GOBP_POSITIVE_REGULATION_OF_GENE_EXPRESSION	GOBP_POSITIVE_REGULATION_OF_GENE_EXPRESSION		211	0.2802	1.24949	0.0858283	0.569074	1	556	tags=25%, list=20%, signal=29%
GOBP_REGULATION_OF_LEUKOCYTE_CHEMOTAXIS	GOBP_REGULATION_OF_LEUKOCYTE_CHEMOTAXIS		15	0.467174	1.2491	0.2	0.568493	1	411	tags=33%, list=15%, signal=39%
GOBP_INTERLEUKIN_8_PRODUCTION	GOBP_INTERLEUKIN_8_PRODUCTION		16	0.522433	1.24879	0.228175	0.567612	1	1059	tags=63%, list=39%, signal=102%
GOCC_GOLGI_CISTERNA	GOCC_GOLGI_CISTERNA		20	0.435338	1.24861	0.198381	0.566415	1	91	tags=15%, list=3%, signal=15%
GOBP_NEGATIVE_REGULATION_OF_EPITHELIAL_CELL_PROLIFERATION	GOBP_NEGATIVE_REGULATION_OF_EPITHELIAL_CELL_PROLIFERATION		29	0.419617	1.24769	0.169261	0.567404	1	156	tags=14%, list=6%, signal=14%
GOBP_PROTEIN_IMPORT	GOBP_PROTEIN_IMPORT		42	0.341915	1.24653	0.168317	0.569195	1	645	tags=40%, list=24%, signal=52%
GOBP_SYNAPSE_ASSEMBLY	GOBP_SYNAPSE_ASSEMBLY		43	0.354546	1.24595	0.14257	0.569214	1	337	tags=14%, list=12%, signal=16%
GOBP_TRANSCRIPTION_COUPLED_NUCLEOTIDE_EXCISION_REPAIR	GOBP_TRANSCRIPTION_COUPLED_NUCLEOTIDE_EXCISION_REPAIR		19	0.422891	1.24525	0.192067	0.569398	1	422	tags=26%, list=15%, signal=31%
GOBP_KERATINOCYTE_DIFFERENTIATION	GOBP_KERATINOCYTE_DIFFERENTIATION		31	0.386552	1.24293	0.141988	0.574589	1	209	tags=19%, list=8%, signal=21%
GOCC_NUCLEOLUS	GOCC_NUCLEOLUS		159	0.259426	1.24287	0.0948617	0.573068	1	666	tags=30%, list=24%, signal=38%
GOBP_MESENCHYME_DEVELOPMENT	GOBP_MESENCHYME_DEVELOPMENT		71	0.352752	1.2428	0.129921	0.571524	1	333	tags=21%, list=12%, signal=23%
GOBP_MYELOID_LEUKOCYTE_MIGRATION	GOBP_MYELOID_LEUKOCYTE_MIGRATION		31	0.400175	1.24115	0.155242	0.574661	1	411	tags=32%, list=15%, signal=38%
GOCC_ACTOMYOSIN	GOCC_ACTOMYOSIN		22	0.395732	1.24087	0.190275	0.573863	1	627	tags=32%, list=23%, signal=41%
GOBP_RESPONSE_TO_CALCIUM_ION	GOBP_RESPONSE_TO_CALCIUM_ION		37	0.383022	1.2406	0.177291	0.572951	1	493	tags=27%, list=18%, signal=33%
GOBP_ENTRY_INTO_HOST	GOBP_ENTRY_INTO_HOST		32	0.386484	1.24032	0.176238	0.57204	1	593	tags=41%, list=22%, signal=51%
GOBP_PEPTIDYL_LYSINE_ACETYLATION	GOBP_PEPTIDYL_LYSINE_ACETYLATION		34	0.335986	1.2399	0.166667	0.571517	1	566	tags=26%, list=21%, signal=33%
GOBP_REGULATION_OF_IMMUNE_SYSTEM_PROCESS	GOBP_REGULATION_OF_IMMUNE_SYSTEM_PROCESS		246	0.28794	1.23934	0.0708502	0.571623	1	420	tags=18%, list=15%, signal=20%
GOBP_REGULATION_OF_CELL_CYCLE_PHASE_TRANSITION	GOBP_REGULATION_OF_CELL_CYCLE_PHASE_TRANSITION		82	0.287313	1.23847	0.128155	0.572464	1	512	tags=28%, list=19%, signal=34%
GOBP_ENZYME_LINKED_RECEPTOR_PROTEIN_SIGNALING_PATHWAY	GOBP_ENZYME_LINKED_RECEPTOR_PROTEIN_SIGNALING_PATHWAY		253	0.296148	1.23736	0.0764588	0.574147	1	331	tags=17%, list=12%, signal=18%
GOMF_TRANSMEMBRANE_RECEPTOR_PROTEIN_TYROSINE_KINASE_ACTIVITY	GOMF_TRANSMEMBRANE_RECEPTOR_PROTEIN_TYROSINE_KINASE_ACTIVITY		22	0.445397	1.23731	0.186538	0.572644	1	211	tags=18%, list=8%, signal=20%
GOBP_CYTOSKELETON_ORGANIZATION	GOBP_CYTOSKELETON_ORGANIZATION		263	0.27093	1.23655	0.0641822	0.573238	1	511	tags=24%, list=19%, signal=27%
GOBP_WATER_HOMEOSTASIS	GOBP_WATER_HOMEOSTASIS		16	0.459622	1.23607	0.184676	0.572884	1	251	tags=25%, list=9%, signal=27%
GOBP_POSITIVE_REGULATION_OF_AUTOPHAGY	GOBP_POSITIVE_REGULATION_OF_AUTOPHAGY		23	0.370353	1.23573	0.236686	0.572154	1	592	tags=35%, list=22%, signal=44%
GOBP_NEGATIVE_REGULATION_OF_TRANSFORMING_GROWTH_FACTOR_BETA_RECEPTOR_SIGNALING_PATHWAY	GOBP_NEGATIVE_REGULATION_OF_TRANSFORMING_GROWTH_FACTOR_BETA_RECEPTOR_SIGNALING_PATHWAY		19	0.449432	1.23503	0.218107	0.572562	1	110	tags=16%, list=4%, signal=16%
GOBP_POSITIVE_REGULATION_OF_CELLULAR_COMPONENT_BIOGENESIS	GOBP_POSITIVE_REGULATION_OF_CELLULAR_COMPONENT_BIOGENESIS		112	0.31017	1.23244	0.104743	0.578639	1	337	tags=18%, list=12%, signal=20%
GOBP_NON_RECOMBINATIONAL_REPAIR	GOBP_NON_RECOMBINATIONAL_REPAIR		16	0.486067	1.23226	0.215534	0.577547	1	757	tags=56%, list=28%, signal=77%
GOBP_RESPONSE_TO_ACID_CHEMICAL	GOBP_RESPONSE_TO_ACID_CHEMICAL		29	0.391642	1.23061	0.156379	0.58104	1	466	tags=38%, list=17%, signal=45%
GOBP_NEGATIVE_REGULATION_OF_MITOTIC_CELL_CYCLE	GOBP_NEGATIVE_REGULATION_OF_MITOTIC_CELL_CYCLE		59	0.326194	1.23024	0.147114	0.580477	1	521	tags=34%, list=19%, signal=41%
GOBP_REGULATION_OF_INTRACELLULAR_PROTEIN_TRANSPORT	GOBP_REGULATION_OF_INTRACELLULAR_PROTEIN_TRANSPORT		65	0.296954	1.22875	0.166667	0.583356	1	454	tags=26%, list=17%, signal=31%
GOBP_MITOTIC_CELL_CYCLE	GOBP_MITOTIC_CELL_CYCLE		180	0.267109	1.22691	0.111332	0.587236	1	521	tags=26%, list=19%, signal=30%
GOBP_NEGATIVE_REGULATION_OF_DNA_METABOLIC_PROCESS	GOBP_NEGATIVE_REGULATION_OF_DNA_METABOLIC_PROCESS		18	0.45992	1.22621	0.243354	0.587683	1	623	tags=44%, list=23%, signal=57%
GOCC_VACUOLAR_MEMBRANE	GOCC_VACUOLAR_MEMBRANE		79	0.313261	1.22555	0.133874	0.587988	1	517	tags=27%, list=19%, signal=32%
GOBP_POSITIVE_REGULATION_OF_MULTICELLULAR_ORGANISMAL_PROCESS	GOBP_POSITIVE_REGULATION_OF_MULTICELLULAR_ORGANISMAL_PROCESS		283	0.286822	1.22473	0.0784708	0.588867	1	464	tags=22%, list=17%, signal=24%
GOBP_NEGATIVE_REGULATION_OF_CHROMOSOME_ORGANIZATION	GOBP_NEGATIVE_REGULATION_OF_CHROMOSOME_ORGANIZATION		20	0.435992	1.22317	0.179537	0.591802	1	727	tags=55%, list=27%, signal=74%
GOBP_NEGATIVE_REGULATION_OF_NUCLEOBASE_CONTAINING_COMPOUND_METABOLIC_PROCESS	GOBP_NEGATIVE_REGULATION_OF_NUCLEOBASE_CONTAINING_COMPOUND_METABOLIC_PROCESS		305	0.272309	1.22304	0.114919	0.590555	1	586	tags=26%, list=22%, signal=29%
GOMF_GROWTH_FACTOR_BINDING	GOMF_GROWTH_FACTOR_BINDING		41	0.380665	1.22261	0.186373	0.590132	1	406	tags=27%, list=15%, signal=31%
GOBP_CELL_CYCLE_PROCESS	GOBP_CELL_CYCLE_PROCESS		252	0.265413	1.22239	0.10303	0.589125	1	521	tags=23%, list=19%, signal=26%
GOBP_ENDOMEMBRANE_SYSTEM_ORGANIZATION	GOBP_ENDOMEMBRANE_SYSTEM_ORGANIZATION		77	0.293397	1.22176	0.154334	0.589215	1	760	tags=42%, list=28%, signal=56%
GOMF_IDENTICAL_PROTEIN_BINDING	GOMF_IDENTICAL_PROTEIN_BINDING		366	0.254989	1.22162	0.06917	0.588046	1	485	tags=22%, list=18%, signal=23%
GOMF_OXIDOREDUCTASE_ACTIVITY_ACTING_ON_PAIRED_DONORS_WITH_INCORPORATION_OR_REDUCTION_OF_MOLECULAR_OXYGEN	GOMF_OXIDOREDUCTASE_ACTIVITY_ACTING_ON_PAIRED_DONORS_WITH_INCORPORATION_OR_REDUCTION_OF_MOLECULAR_OXYGEN		24	0.40324	1.22146	0.202312	0.586942	1	489	tags=33%, list=18%, signal=40%
GOBP_ESTABLISHMENT_OR_MAINTENANCE_OF_CELL_POLARITY	GOBP_ESTABLISHMENT_OR_MAINTENANCE_OF_CELL_POLARITY		50	0.315038	1.22125	0.13442	0.585903	1	365	tags=24%, list=13%, signal=27%
GOBP_NEGATIVE_REGULATION_OF_CELL_ADHESION	GOBP_NEGATIVE_REGULATION_OF_CELL_ADHESION		75	0.330217	1.22006	0.140873	0.587977	1	364	tags=20%, list=13%, signal=22%
GOBP_EPIDERMIS_DEVELOPMENT	GOBP_EPIDERMIS_DEVELOPMENT		62	0.324847	1.21876	0.140206	0.590238	1	248	tags=16%, list=9%, signal=17%
GOBP_MITOTIC_CELL_CYCLE_CHECKPOINT	GOBP_MITOTIC_CELL_CYCLE_CHECKPOINT		28	0.391489	1.21777	0.172962	0.591768	1	512	tags=46%, list=19%, signal=57%
GOBP_EXTRACELLULAR_MATRIX_DISASSEMBLY	GOBP_EXTRACELLULAR_MATRIX_DISASSEMBLY		18	0.426979	1.21726	0.199597	0.591773	1	261	tags=17%, list=10%, signal=18%
GOMF_INTEGRIN_BINDING	GOMF_INTEGRIN_BINDING		42	0.406282	1.21565	0.188797	0.594772	1	375	tags=29%, list=14%, signal=33%
GOBP_CARDIAC_MUSCLE_CELL_PROLIFERATION	GOBP_CARDIAC_MUSCLE_CELL_PROLIFERATION		19	0.43165	1.21409	0.232604	0.597647	1	248	tags=16%, list=9%, signal=17%
GOCC_POLYMERIC_CYTOSKELETAL_FIBER	GOCC_POLYMERIC_CYTOSKELETAL_FIBER		101	0.286365	1.21363	0.122363	0.597379	1	545	tags=27%, list=20%, signal=32%
GOBP_REGULATION_OF_BMP_SIGNALING_PATHWAY	GOBP_REGULATION_OF_BMP_SIGNALING_PATHWAY		21	0.474503	1.21112	0.208925	0.603488	1	104	tags=19%, list=4%, signal=20%
GOBP_AGING	GOBP_AGING		62	0.337	1.2108	0.186898	0.602876	1	480	tags=31%, list=18%, signal=36%
GOMF_HISTONE_BINDING	GOMF_HISTONE_BINDING		37	0.356026	1.20993	0.215385	0.603957	1	168	tags=11%, list=6%, signal=11%
GOBP_POSITIVE_REGULATION_OF_CELL_CYCLE_PHASE_TRANSITION	GOBP_POSITIVE_REGULATION_OF_CELL_CYCLE_PHASE_TRANSITION		18	0.430904	1.20925	0.222008	0.604407	1	496	tags=39%, list=18%, signal=47%
GOBP_RAS_PROTEIN_SIGNAL_TRANSDUCTION	GOBP_RAS_PROTEIN_SIGNAL_TRANSDUCTION		80	0.308759	1.20829	0.158333	0.605701	1	241	tags=18%, list=9%, signal=19%
GOBP_CELL_DIFFERENTIATION_INVOLVED_IN_KIDNEY_DEVELOPMENT	GOBP_CELL_DIFFERENTIATION_INVOLVED_IN_KIDNEY_DEVELOPMENT		16	0.437722	1.20686	0.22428	0.60853	1	645	tags=44%, list=24%, signal=57%
GOBP_ACTIN_FILAMENT_BASED_PROCESS	GOBP_ACTIN_FILAMENT_BASED_PROCESS		171	0.279113	1.20678	0.111776	0.607146	1	461	tags=22%, list=17%, signal=24%
GOCC_RIBONUCLEOPROTEIN_COMPLEX	GOCC_RIBONUCLEOPROTEIN_COMPLEX		135	0.217992	1.20589	0.181087	0.608252	1	556	tags=24%, list=20%, signal=28%
GOBP_SISTER_CHROMATID_SEGREGATION	GOBP_SISTER_CHROMATID_SEGREGATION		32	0.383927	1.20562	0.233607	0.607384	1	521	tags=34%, list=19%, signal=42%
GOBP_RESPONSE_TO_CORTICOSTEROID	GOBP_RESPONSE_TO_CORTICOSTEROID		34	0.354399	1.20485	0.199125	0.60813	1	420	tags=26%, list=15%, signal=31%
GOBP_FOCAL_ADHESION_ASSEMBLY	GOBP_FOCAL_ADHESION_ASSEMBLY		26	0.410476	1.20462	0.216495	0.607247	1	365	tags=23%, list=13%, signal=26%
GOBP_ORGANIC_CYCLIC_COMPOUND_CATABOLIC_PROCESS	GOBP_ORGANIC_CYCLIC_COMPOUND_CATABOLIC_PROCESS		136	0.249195	1.20403	0.195876	0.607429	1	978	tags=46%, list=36%, signal=68%
GOBP_HORMONE_METABOLIC_PROCESS	GOBP_HORMONE_METABOLIC_PROCESS		36	0.382411	1.20385	0.150424	0.606321	1	584	tags=33%, list=21%, signal=42%
GOBP_CELLULAR_PROTEIN_CONTAINING_COMPLEX_ASSEMBLY	GOBP_CELLULAR_PROTEIN_CONTAINING_COMPLEX_ASSEMBLY		170	0.245162	1.20216	0.142857	0.609916	1	543	tags=23%, list=20%, signal=27%
GOBP_CELLULAR_RESPONSE_TO_OXYGEN_LEVELS	GOBP_CELLULAR_RESPONSE_TO_OXYGEN_LEVELS		56	0.311409	1.20212	0.166324	0.608441	1	414	tags=25%, list=15%, signal=29%
GOBP_MULTICELLULAR_ORGANISM_REPRODUCTION	GOBP_MULTICELLULAR_ORGANISM_REPRODUCTION		151	0.292972	1.19972	0.0945674	0.614157	1	449	tags=23%, list=16%, signal=25%
GOBP_PEPTIDYL_LYSINE_METHYLATION	GOBP_PEPTIDYL_LYSINE_METHYLATION		16	0.445019	1.198	0.25498	0.617874	1	63	tags=13%, list=2%, signal=13%
GOBP_MAINTENANCE_OF_LOCATION_IN_CELL	GOBP_MAINTENANCE_OF_LOCATION_IN_CELL		35	0.331522	1.19792	0.223361	0.616525	1	834	tags=46%, list=31%, signal=65%
GOBP_PROSTATE_GLAND_DEVELOPMENT	GOBP_PROSTATE_GLAND_DEVELOPMENT		16	0.436178	1.19753	0.230126	0.616154	1	93	tags=13%, list=3%, signal=13%
GOBP_NEGATIVE_REGULATION_OF_CELL_CELL_ADHESION	GOBP_NEGATIVE_REGULATION_OF_CELL_CELL_ADHESION		44	0.345752	1.19688	0.212185	0.616345	1	115	tags=11%, list=4%, signal=12%
GOBP_POSITIVE_REGULATION_OF_GROWTH	GOBP_POSITIVE_REGULATION_OF_GROWTH		63	0.320253	1.19652	0.150579	0.615888	1	411	tags=22%, list=15%, signal=26%
GOBP_RESPONSE_TO_ABIOTIC_STIMULUS	GOBP_RESPONSE_TO_ABIOTIC_STIMULUS		258	0.266619	1.19641	0.0935673	0.61464	1	477	tags=24%, list=18%, signal=27%
GOBP_REGULATION_OF_CELL_CYCLE	GOBP_REGULATION_OF_CELL_CYCLE		234	0.26486	1.19609	0.130693	0.614131	1	521	tags=25%, list=19%, signal=28%
GOBP_REGULATION_OF_CELL_MATRIX_ADHESION	GOBP_REGULATION_OF_CELL_MATRIX_ADHESION		34	0.373974	1.19566	0.186879	0.613933	1	365	tags=21%, list=13%, signal=23%
GOCC_LATE_ENDOSOME	GOCC_LATE_ENDOSOME		42	0.353624	1.19507	0.190196	0.614117	1	488	tags=31%, list=18%, signal=37%
GOBP_MIDBRAIN_DEVELOPMENT	GOBP_MIDBRAIN_DEVELOPMENT		22	0.417877	1.19495	0.19685	0.612994	1	268	tags=23%, list=10%, signal=25%
GOBP_CELL_MIGRATION	GOBP_CELL_MIGRATION		299	0.290891	1.19441	0.112705	0.613156	1	502	tags=25%, list=18%, signal=27%
GOBP_EMBRYO_DEVELOPMENT	GOBP_EMBRYO_DEVELOPMENT		206	0.288794	1.19433	0.130178	0.611844	1	615	tags=29%, list=23%, signal=34%
GOBP_REGULATION_OF_MITOTIC_NUCLEAR_DIVISION	GOBP_REGULATION_OF_MITOTIC_NUCLEAR_DIVISION		25	0.407714	1.19202	0.213052	0.61729	1	510	tags=44%, list=19%, signal=54%
GOBP_NEGATIVE_REGULATION_OF_ANION_TRANSPORT	GOBP_NEGATIVE_REGULATION_OF_ANION_TRANSPORT		34	0.344718	1.1919	0.207661	0.616067	1	340	tags=21%, list=12%, signal=23%
GOBP_LEUKOCYTE_CHEMOTAXIS	GOBP_LEUKOCYTE_CHEMOTAXIS		31	0.374967	1.19152	0.19604	0.61559	1	411	tags=32%, list=15%, signal=38%
GOBP_PRIMARY_ALCOHOL_METABOLIC_PROCESS	GOBP_PRIMARY_ALCOHOL_METABOLIC_PROCESS		17	0.431916	1.19006	0.217119	0.618678	1	584	tags=47%, list=21%, signal=60%
GOBP_CELLULAR_AMINO_ACID_CATABOLIC_PROCESS	GOBP_CELLULAR_AMINO_ACID_CATABOLIC_PROCESS		24	0.426078	1.18878	0.213307	0.620981	1	278	tags=29%, list=10%, signal=32%
GOBP_CELL_CYCLE_G1_S_PHASE_TRANSITION	GOBP_CELL_CYCLE_G1_S_PHASE_TRANSITION		60	0.315008	1.1886	0.199609	0.620002	1	512	tags=30%, list=19%, signal=36%
GOBP_PROTEIN_METHYLATION	GOBP_PROTEIN_METHYLATION		21	0.406176	1.18842	0.245935	0.619014	1	521	tags=29%, list=19%, signal=35%
GOBP_PROTEIN_LOCALIZATION_TO_NUCLEUS	GOBP_PROTEIN_LOCALIZATION_TO_NUCLEUS		63	0.325042	1.18788	0.218	0.619141	1	697	tags=38%, list=26%, signal=50%
GOBP_RESPONSE_TO_MECHANICAL_STIMULUS	GOBP_RESPONSE_TO_MECHANICAL_STIMULUS		54	0.347342	1.18771	0.17732	0.618139	1	463	tags=35%, list=17%, signal=42%
GOMF_PROTEIN_DIMERIZATION_ACTIVITY	GOMF_PROTEIN_DIMERIZATION_ACTIVITY		196	0.271467	1.18666	0.129225	0.619871	1	530	tags=26%, list=19%, signal=30%
GOBP_CELL_CHEMOTAXIS	GOBP_CELL_CHEMOTAXIS		44	0.380998	1.18643	0.194779	0.619159	1	411	tags=32%, list=15%, signal=37%
GOBP_STEROL_TRANSPORT	GOBP_STEROL_TRANSPORT		19	0.448642	1.18613	0.201207	0.618511	1	328	tags=26%, list=12%, signal=30%
GOCC_BASEMENT_MEMBRANE	GOCC_BASEMENT_MEMBRANE		20	0.484882	1.18526	0.198	0.619655	1	329	tags=30%, list=12%, signal=34%
GOMF_CYTOKINE_ACTIVITY	GOMF_CYTOKINE_ACTIVITY		23	0.412169	1.1845	0.219316	0.620467	1	703	tags=52%, list=26%, signal=70%
GOBP_NEGATIVE_REGULATION_OF_ESTABLISHMENT_OF_PROTEIN_LOCALIZATION	GOBP_NEGATIVE_REGULATION_OF_ESTABLISHMENT_OF_PROTEIN_LOCALIZATION		22	0.3843	1.18385	0.218876	0.620924	1	113	tags=18%, list=4%, signal=19%
GOBP_NEGATIVE_REGULATION_OF_CELL_CYCLE_G1_S_PHASE_TRANSITION	GOBP_NEGATIVE_REGULATION_OF_CELL_CYCLE_G1_S_PHASE_TRANSITION		22	0.402023	1.18332	0.217391	0.621003	1	512	tags=41%, list=19%, signal=50%
GOBP_RESPONSE_TO_HORMONE	GOBP_RESPONSE_TO_HORMONE		191	0.27577	1.18238	0.155556	0.62241	1	515	tags=26%, list=19%, signal=30%
GOMF_CYTOSKELETAL_PROTEIN_BINDING	GOMF_CYTOSKELETAL_PROTEIN_BINDING		223	0.258861	1.18226	0.129167	0.621291	1	555	tags=25%, list=20%, signal=29%
GOBP_NEGATIVE_REGULATION_OF_CELLULAR_AMIDE_METABOLIC_PROCESS	GOBP_NEGATIVE_REGULATION_OF_CELLULAR_AMIDE_METABOLIC_PROCESS		31	0.315583	1.18187	0.231373	0.621126	1	550	tags=35%, list=20%, signal=44%
GOBP_AMINOGLYCAN_CATABOLIC_PROCESS	GOBP_AMINOGLYCAN_CATABOLIC_PROCESS		16	0.46544	1.18085	0.245161	0.622829	1	425	tags=31%, list=16%, signal=37%
GOBP_IRE1_MEDIATED_UNFOLDED_PROTEIN_RESPONSE	GOBP_IRE1_MEDIATED_UNFOLDED_PROTEIN_RESPONSE		19	0.397975	1.17972	0.251462	0.624646	1	513	tags=32%, list=19%, signal=39%
GOBP_NUCLEOTIDE_PHOSPHORYLATION	GOBP_NUCLEOTIDE_PHOSPHORYLATION		38	0.361573	1.17849	0.205589	0.626775	1	437	tags=34%, list=16%, signal=40%
GOBP_EYE_MORPHOGENESIS	GOBP_EYE_MORPHOGENESIS		33	0.374065	1.17726	0.208081	0.628923	1	140	tags=15%, list=5%, signal=16%
GOBP_CELL_CYCLE	GOBP_CELL_CYCLE		354	0.246727	1.17691	0.134	0.628489	1	513	tags=22%, list=19%, signal=24%
GOBP_RESPONSE_TO_ENDOGENOUS_STIMULUS	GOBP_RESPONSE_TO_ENDOGENOUS_STIMULUS		354	0.265106	1.17613	0.112266	0.629303	1	456	tags=21%, list=17%, signal=22%
GOBP_POSITIVE_REGULATION_OF_CELLULAR_COMPONENT_ORGANIZATION	GOBP_POSITIVE_REGULATION_OF_CELLULAR_COMPONENT_ORGANIZATION		247	0.258406	1.17576	0.131737	0.628796	1	313	tags=14%, list=11%, signal=15%
GOBP_REGULATION_OF_CELL_SUBSTRATE_JUNCTION_ORGANIZATION	GOBP_REGULATION_OF_CELL_SUBSTRATE_JUNCTION_ORGANIZATION		21	0.421559	1.17559	0.236364	0.627774	1	365	tags=24%, list=13%, signal=27%
GOBP_REGULATION_OF_CARBOHYDRATE_METABOLIC_PROCESS	GOBP_REGULATION_OF_CARBOHYDRATE_METABOLIC_PROCESS		59	0.330785	1.17398	0.180934	0.630917	1	437	tags=32%, list=16%, signal=38%
GOBP_RHO_PROTEIN_SIGNAL_TRANSDUCTION	GOBP_RHO_PROTEIN_SIGNAL_TRANSDUCTION		26	0.395355	1.17341	0.239583	0.631161	1	694	tags=38%, list=25%, signal=51%
GOBP_MOVEMENT_IN_HOST_ENVIRONMENT	GOBP_MOVEMENT_IN_HOST_ENVIRONMENT		35	0.350146	1.17269	0.237255	0.631742	1	593	tags=37%, list=22%, signal=47%
GOBP_REGULATION_OF_RAS_PROTEIN_SIGNAL_TRANSDUCTION	GOBP_REGULATION_OF_RAS_PROTEIN_SIGNAL_TRANSDUCTION		44	0.341037	1.17231	0.195279	0.63142	1	241	tags=20%, list=9%, signal=22%
GOMF_DAMAGED_DNA_BINDING	GOMF_DAMAGED_DNA_BINDING		16	0.433576	1.1722	0.258947	0.630265	1	543	tags=38%, list=20%, signal=47%
GOBP_ANATOMICAL_STRUCTURE_HOMEOSTASIS	GOBP_ANATOMICAL_STRUCTURE_HOMEOSTASIS		87	0.303108	1.17089	0.166667	0.632818	1	631	tags=30%, list=23%, signal=38%
GOBP_REGULATION_OF_CELLULAR_COMPONENT_BIOGENESIS	GOBP_REGULATION_OF_CELLULAR_COMPONENT_BIOGENESIS		204	0.261179	1.17039	0.112	0.632951	1	501	tags=21%, list=18%, signal=23%
GOBP_CELL_MIGRATION_INVOLVED_IN_SPROUTING_ANGIOGENESIS	GOBP_CELL_MIGRATION_INVOLVED_IN_SPROUTING_ANGIOGENESIS		15	0.450138	1.17014	0.271949	0.632177	1	493	tags=53%, list=18%, signal=65%
GOBP_REGULATION_OF_OSTEOBLAST_DIFFERENTIATION	GOBP_REGULATION_OF_OSTEOBLAST_DIFFERENTIATION		31	0.391474	1.16986	0.239923	0.631543	1	413	tags=32%, list=15%, signal=38%
GOBP_MESENCHYMAL_CELL_DIFFERENTIATION	GOBP_MESENCHYMAL_CELL_DIFFERENTIATION		56	0.337273	1.16963	0.198381	0.630731	1	292	tags=16%, list=11%, signal=18%
GOBP_CELLULAR_RESPONSE_TO_LIPID	GOBP_CELLULAR_RESPONSE_TO_LIPID		110	0.281116	1.16897	0.151767	0.63134	1	420	tags=20%, list=15%, signal=23%
GOMF_SINGLE_STRANDED_DNA_BINDING	GOMF_SINGLE_STRANDED_DNA_BINDING		30	0.350351	1.16888	0.261538	0.630144	1	442	tags=27%, list=16%, signal=31%
GOBP_CELL_ACTIVATION_INVOLVED_IN_IMMUNE_RESPONSE	GOBP_CELL_ACTIVATION_INVOLVED_IN_IMMUNE_RESPONSE		123	0.298024	1.16843	0.213861	0.630032	1	445	tags=23%, list=16%, signal=26%
GOBP_HEART_DEVELOPMENT	GOBP_HEART_DEVELOPMENT		128	0.284289	1.16837	0.172	0.628803	1	463	tags=23%, list=17%, signal=27%
GOBP_BIOLOGICAL_PROCESS_INVOLVED_IN_INTERACTION_WITH_HOST	GOBP_BIOLOGICAL_PROCESS_INVOLVED_IN_INTERACTION_WITH_HOST		47	0.309708	1.16712	0.231911	0.631103	1	601	tags=36%, list=22%, signal=46%
GOBP_REGULATION_OF_EXTRINSIC_APOPTOTIC_SIGNALING_PATHWAY_VIA_DEATH_DOMAIN_RECEPTORS	GOBP_REGULATION_OF_EXTRINSIC_APOPTOTIC_SIGNALING_PATHWAY_VIA_DEATH_DOMAIN_RECEPTORS		18	0.415118	1.16673	0.258964	0.630803	1	311	tags=22%, list=11%, signal=25%
GOBP_RESPONSE_TO_LIPID	GOBP_RESPONSE_TO_LIPID		170	0.277095	1.16635	0.143737	0.630449	1	420	tags=21%, list=15%, signal=23%
GOBP_NUCLEOSIDE_DIPHOSPHATE_METABOLIC_PROCESS	GOBP_NUCLEOSIDE_DIPHOSPHATE_METABOLIC_PROCESS		48	0.334229	1.16581	0.220077	0.630595	1	437	tags=29%, list=16%, signal=34%
GOBP_NEGATIVE_REGULATION_OF_EPITHELIAL_CELL_MIGRATION	GOBP_NEGATIVE_REGULATION_OF_EPITHELIAL_CELL_MIGRATION		23	0.413893	1.16526	0.262525	0.630901	1	449	tags=35%, list=16%, signal=41%
GOBP_MAINTENANCE_OF_LOCATION	GOBP_MAINTENANCE_OF_LOCATION		60	0.295424	1.16517	0.241237	0.629739	1	437	tags=20%, list=16%, signal=23%
GOMF_TRANSFERASE_ACTIVITY_TRANSFERRING_HEXOSYL_GROUPS	GOMF_TRANSFERASE_ACTIVITY_TRANSFERRING_HEXOSYL_GROUPS		25	0.400635	1.16407	0.245968	0.631623	1	251	tags=20%, list=9%, signal=22%
GOMF_DNA_BINDING_TRANSCRIPTION_FACTOR_ACTIVITY	GOMF_DNA_BINDING_TRANSCRIPTION_FACTOR_ACTIVITY		261	0.278235	1.16305	0.150391	0.633101	1	598	tags=25%, list=22%, signal=29%
GOBP_REGULATION_OF_BINDING	GOBP_REGULATION_OF_BINDING		82	0.288227	1.16291	0.195312	0.632078	1	521	tags=26%, list=19%, signal=31%
GOCC_CONDENSED_CHROMOSOME	GOCC_CONDENSED_CHROMOSOME		34	0.348056	1.16281	0.242857	0.63097	1	770	tags=47%, list=28%, signal=65%
GOCC_GOLGI_LUMEN	GOCC_GOLGI_LUMEN		18	0.429618	1.16281	0.221757	0.62957	1	203	tags=22%, list=7%, signal=24%
GOBP_RESPONSE_TO_ALCOHOL	GOBP_RESPONSE_TO_ALCOHOL		53	0.318995	1.15941	0.207317	0.638368	1	414	tags=21%, list=15%, signal=24%
GOBP_NEGATIVE_REGULATION_OF_KINASE_ACTIVITY	GOBP_NEGATIVE_REGULATION_OF_KINASE_ACTIVITY		51	0.29389	1.15904	0.232742	0.638085	1	465	tags=24%, list=17%, signal=28%
GOBP_MUSCLE_CELL_PROLIFERATION	GOBP_MUSCLE_CELL_PROLIFERATION		52	0.34876	1.15894	0.214712	0.637018	1	543	tags=29%, list=20%, signal=35%
GOBP_NEGATIVE_REGULATION_OF_AUTOPHAGY	GOBP_NEGATIVE_REGULATION_OF_AUTOPHAGY		18	0.365143	1.15862	0.295019	0.636546	1	455	tags=28%, list=17%, signal=33%
GOBP_POSITIVE_REGULATION_OF_DEVELOPMENTAL_GROWTH	GOBP_POSITIVE_REGULATION_OF_DEVELOPMENTAL_GROWTH		49	0.320771	1.15797	0.224762	0.637074	1	464	tags=27%, list=17%, signal=31%
GOCC_ORGANELLE_SUBCOMPARTMENT	GOCC_ORGANELLE_SUBCOMPARTMENT		282	0.254719	1.15487	0.154309	0.644665	1	545	tags=22%, list=20%, signal=25%
GOCC_MICROVILLUS	GOCC_MICROVILLUS		15	0.445171	1.15417	0.271255	0.645371	1	859	tags=47%, list=32%, signal=68%
GOBP_PERIPHERAL_NERVOUS_SYSTEM_DEVELOPMENT	GOBP_PERIPHERAL_NERVOUS_SYSTEM_DEVELOPMENT		22	0.378266	1.15303	0.231537	0.647258	1	759	tags=41%, list=28%, signal=56%
GOBP_SENSORY_ORGAN_DEVELOPMENT	GOBP_SENSORY_ORGAN_DEVELOPMENT		111	0.297797	1.15285	0.227451	0.646291	1	463	tags=22%, list=17%, signal=25%
GOBP_CARBOHYDRATE_CATABOLIC_PROCESS	GOBP_CARBOHYDRATE_CATABOLIC_PROCESS		54	0.327673	1.15252	0.222222	0.645815	1	437	tags=31%, list=16%, signal=37%
GOBP_PROTEIN_MODIFICATION_BY_SMALL_PROTEIN_REMOVAL	GOBP_PROTEIN_MODIFICATION_BY_SMALL_PROTEIN_REMOVAL		70	0.287843	1.15246	0.241379	0.644575	1	328	tags=14%, list=12%, signal=16%
GOBP_POSITIVE_REGULATION_OF_MITOTIC_CELL_CYCLE	GOBP_POSITIVE_REGULATION_OF_MITOTIC_CELL_CYCLE		25	0.380568	1.15196	0.269461	0.644818	1	496	tags=36%, list=18%, signal=44%
GOCC_P_BODY	GOCC_P_BODY		20	0.376837	1.15043	0.276342	0.647971	1	530	tags=40%, list=19%, signal=49%
GOBP_VIRAL_LIFE_CYCLE	GOBP_VIRAL_LIFE_CYCLE		68	0.296567	1.15026	0.216867	0.647093	1	691	tags=38%, list=25%, signal=50%
GOBP_REGULATION_OF_PROTEIN_TYROSINE_KINASE_ACTIVITY	GOBP_REGULATION_OF_PROTEIN_TYROSINE_KINASE_ACTIVITY		20	0.386886	1.15002	0.270876	0.646317	1	389	tags=20%, list=14%, signal=23%
GOBP_NEGATIVE_REGULATION_OF_LOCOMOTION	GOBP_NEGATIVE_REGULATION_OF_LOCOMOTION		67	0.321775	1.14999	0.237219	0.645046	1	385	tags=22%, list=14%, signal=25%
GOBP_CONNECTIVE_TISSUE_DEVELOPMENT	GOBP_CONNECTIVE_TISSUE_DEVELOPMENT		68	0.350801	1.1491	0.240166	0.646366	1	493	tags=26%, list=18%, signal=32%
GOBP_PYRUVATE_METABOLIC_PROCESS	GOBP_PYRUVATE_METABOLIC_PROCESS		43	0.347902	1.14858	0.221344	0.646408	1	340	tags=28%, list=12%, signal=31%
GOBP_LEARNING	GOBP_LEARNING		17	0.434373	1.14823	0.273267	0.646016	1	243	tags=24%, list=9%, signal=26%
GOBP_RESPONSE_TO_BIOTIC_STIMULUS	GOBP_RESPONSE_TO_BIOTIC_STIMULUS		242	0.278227	1.14821	0.22379	0.644719	1	414	tags=17%, list=15%, signal=18%
GOBP_OSTEOBLAST_DIFFERENTIATION	GOBP_OSTEOBLAST_DIFFERENTIATION		49	0.334222	1.14701	0.21673	0.646798	1	413	tags=24%, list=15%, signal=28%
GOBP_PROCESS_UTILIZING_AUTOPHAGIC_MECHANISM	GOBP_PROCESS_UTILIZING_AUTOPHAGIC_MECHANISM		105	0.245879	1.14482	0.223819	0.65213	1	513	tags=27%, list=19%, signal=32%
GOBP_CELL_SUBSTRATE_ADHESION	GOBP_CELL_SUBSTRATE_ADHESION		92	0.309651	1.1412	0.201663	0.661555	1	365	tags=21%, list=13%, signal=23%
GOBP_CIRCULATORY_SYSTEM_DEVELOPMENT	GOBP_CIRCULATORY_SYSTEM_DEVELOPMENT		249	0.266633	1.13992	0.172962	0.664038	1	478	tags=23%, list=18%, signal=25%
GOBP_NUCLEUS_ORGANIZATION	GOBP_NUCLEUS_ORGANIZATION		27	0.344605	1.13898	0.319277	0.665447	1	848	tags=52%, list=31%, signal=75%
GOBP_REGULATION_OF_CELL_ADHESION	GOBP_REGULATION_OF_CELL_ADHESION		168	0.276336	1.13826	0.217131	0.666202	1	365	tags=18%, list=13%, signal=20%
GOBP_NEGATIVE_REGULATION_OF_NUCLEAR_DIVISION	GOBP_NEGATIVE_REGULATION_OF_NUCLEAR_DIVISION		16	0.416215	1.13776	0.287356	0.666326	1	510	tags=44%, list=19%, signal=54%
GOBP_PEPTIDYL_AMINO_ACID_MODIFICATION	GOBP_PEPTIDYL_AMINO_ACID_MODIFICATION		248	0.24747	1.13685	0.188492	0.667527	1	423	tags=18%, list=16%, signal=20%
GOBP_MACROMOLECULE_DEACYLATION	GOBP_MACROMOLECULE_DEACYLATION		25	0.370159	1.1359	0.261905	0.669083	1	131	tags=16%, list=5%, signal=17%
GOBP_REGULATION_OF_PROTEIN_IMPORT	GOBP_REGULATION_OF_PROTEIN_IMPORT		16	0.391161	1.13457	0.311609	0.671641	1	697	tags=50%, list=26%, signal=67%
GOMF_SIGNALING_RECEPTOR_BINDING	GOMF_SIGNALING_RECEPTOR_BINDING		310	0.268988	1.13398	0.182008	0.671935	1	299	tags=15%, list=11%, signal=15%
GOBP_SUPRAMOLECULAR_FIBER_ORGANIZATION	GOBP_SUPRAMOLECULAR_FIBER_ORGANIZATION		159	0.26445	1.13376	0.228216	0.671219	1	511	tags=23%, list=19%, signal=26%
GOBP_RESPONSE_TO_WOUNDING	GOBP_RESPONSE_TO_WOUNDING		157	0.27175	1.13346	0.208835	0.670733	1	455	tags=21%, list=17%, signal=24%
GOMF_ISOMERASE_ACTIVITY	GOMF_ISOMERASE_ACTIVITY		24	0.360125	1.13209	0.246154	0.673448	1	191	tags=21%, list=7%, signal=22%
GOBP_REGULATION_OF_CARTILAGE_DEVELOPMENT	GOBP_REGULATION_OF_CARTILAGE_DEVELOPMENT		19	0.452875	1.13077	0.297787	0.676142	1	311	tags=26%, list=11%, signal=30%
GOBP_MODULATION_OF_PROCESS_OF_OTHER_ORGANISM	GOBP_MODULATION_OF_PROCESS_OF_OTHER_ORGANISM		21	0.350663	1.13035	0.314991	0.675996	1	697	tags=48%, list=26%, signal=63%
GOBP_CELLULAR_RESPONSE_TO_EXTRACELLULAR_STIMULUS	GOBP_CELLULAR_RESPONSE_TO_EXTRACELLULAR_STIMULUS		42	0.347128	1.13022	0.251451	0.675073	1	382	tags=26%, list=14%, signal=30%
GOBP_NEURAL_RETINA_DEVELOPMENT	GOBP_NEURAL_RETINA_DEVELOPMENT		17	0.378681	1.12827	0.283203	0.67954	1	711	tags=35%, list=26%, signal=47%
GOBP_REACTIVE_OXYGEN_SPECIES_METABOLIC_PROCESS	GOBP_REACTIVE_OXYGEN_SPECIES_METABOLIC_PROCESS		42	0.357097	1.1269	0.288201	0.682439	1	414	tags=29%, list=15%, signal=33%
GOMF_PROTEIN_HOMODIMERIZATION_ACTIVITY	GOMF_PROTEIN_HOMODIMERIZATION_ACTIVITY		135	0.277774	1.12686	0.22561	0.681162	1	374	tags=21%, list=14%, signal=24%
GOCC_LATERAL_PLASMA_MEMBRANE	GOCC_LATERAL_PLASMA_MEMBRANE		19	0.411476	1.12668	0.274354	0.680292	1	262	tags=26%, list=10%, signal=29%
GOBP_POSITIVE_REGULATION_OF_PLASMA_MEMBRANE_BOUNDED_CELL_PROJECTION_ASSEMBLY	GOBP_POSITIVE_REGULATION_OF_PLASMA_MEMBRANE_BOUNDED_CELL_PROJECTION_ASSEMBLY		21	0.391606	1.12635	0.306163	0.679832	1	501	tags=29%, list=18%, signal=35%
GOBP_HORMONE_MEDIATED_SIGNALING_PATHWAY	GOBP_HORMONE_MEDIATED_SIGNALING_PATHWAY		37	0.314615	1.1253	0.253036	0.681585	1	238	tags=11%, list=9%, signal=12%
GOBP_MESONEPHROS_DEVELOPMENT	GOBP_MESONEPHROS_DEVELOPMENT		18	0.433439	1.12317	0.312896	0.686751	1	433	tags=28%, list=16%, signal=33%
GOMF_PROTEIN_CONTAINING_COMPLEX_BINDING	GOMF_PROTEIN_CONTAINING_COMPLEX_BINDING		255	0.255148	1.12311	0.217573	0.685547	1	375	tags=18%, list=14%, signal=19%
GOBP_FAT_CELL_DIFFERENTIATION	GOBP_FAT_CELL_DIFFERENTIATION		45	0.332695	1.12279	0.285714	0.685196	1	295	tags=18%, list=11%, signal=20%
GOBP_REGULATION_OF_LIPID_STORAGE	GOBP_REGULATION_OF_LIPID_STORAGE		15	0.412891	1.12216	0.301181	0.685775	1	389	tags=27%, list=14%, signal=31%
GOBP_ENDOSOMAL_TRANSPORT	GOBP_ENDOSOMAL_TRANSPORT		42	0.296797	1.12213	0.277992	0.684471	1	460	tags=26%, list=17%, signal=31%
GOBP_MUSCLE_HYPERTROPHY	GOBP_MUSCLE_HYPERTROPHY		26	0.350491	1.12077	0.287425	0.687433	1	571	tags=42%, list=21%, signal=53%
GOBP_CELL_JUNCTION_ORGANIZATION	GOBP_CELL_JUNCTION_ORGANIZATION		165	0.257226	1.12026	0.197938	0.68765	1	368	tags=16%, list=14%, signal=18%
GOMF_HYDROLASE_ACTIVITY_ACTING_ON_GLYCOSYL_BONDS	GOMF_HYDROLASE_ACTIVITY_ACTING_ON_GLYCOSYL_BONDS		17	0.406271	1.12021	0.297071	0.686451	1	352	tags=18%, list=13%, signal=20%
GOBP_MALE_SEX_DIFFERENTIATION	GOBP_MALE_SEX_DIFFERENTIATION		36	0.345837	1.1181	0.257545	0.691433	1	274	tags=19%, list=10%, signal=21%
GOCC_CONTRACTILE_FIBER	GOCC_CONTRACTILE_FIBER		53	0.285308	1.11765	0.280488	0.691441	1	283	tags=13%, list=10%, signal=14%
GOBP_MODULATION_OF_PROCESS_OF_OTHER_ORGANISM_INVOLVED_IN_SYMBIOTIC_INTERACTION	GOBP_MODULATION_OF_PROCESS_OF_OTHER_ORGANISM_INVOLVED_IN_SYMBIOTIC_INTERACTION		18	0.345517	1.11713	0.324324	0.691624	1	697	tags=50%, list=26%, signal=67%
GOBP_METAPHASE_ANAPHASE_TRANSITION_OF_CELL_CYCLE	GOBP_METAPHASE_ANAPHASE_TRANSITION_OF_CELL_CYCLE		15	0.423799	1.11678	0.32681	0.691357	1	510	tags=47%, list=19%, signal=57%
GOMF_PROTEIN_TYROSINE_KINASE_ACTIVITY	GOMF_PROTEIN_TYROSINE_KINASE_ACTIVITY		38	0.354502	1.11652	0.304519	0.69075	1	211	tags=13%, list=8%, signal=14%
GOBP_NEGATIVE_REGULATION_OF_MAPK_CASCADE	GOBP_NEGATIVE_REGULATION_OF_MAPK_CASCADE		34	0.325819	1.1157	0.281192	0.691852	1	502	tags=26%, list=18%, signal=32%
GOBP_HEART_MORPHOGENESIS	GOBP_HEART_MORPHOGENESIS		58	0.309446	1.11497	0.269841	0.69263	1	463	tags=26%, list=17%, signal=30%
GOBP_REGULATION_OF_SYNAPSE_STRUCTURE_OR_ACTIVITY	GOBP_REGULATION_OF_SYNAPSE_STRUCTURE_OR_ACTIVITY		48	0.309574	1.11391	0.297917	0.6945	1	267	tags=13%, list=10%, signal=14%
GOBP_DEVELOPMENTAL_PROCESS_INVOLVED_IN_REPRODUCTION	GOBP_DEVELOPMENTAL_PROCESS_INVOLVED_IN_REPRODUCTION		176	0.261062	1.11378	0.184739	0.693493	1	455	tags=22%, list=17%, signal=24%
GOMF_TRANSFERASE_ACTIVITY_TRANSFERRING_GLYCOSYL_GROUPS	GOMF_TRANSFERASE_ACTIVITY_TRANSFERRING_GLYCOSYL_GROUPS		29	0.365228	1.11164	0.269618	0.698619	1	251	tags=17%, list=9%, signal=19%
GOMF_PDZ_DOMAIN_BINDING	GOMF_PDZ_DOMAIN_BINDING		29	0.33042	1.11164	0.285714	0.697268	1	519	tags=21%, list=19%, signal=25%
GOBP_MUSCLE_CELL_MIGRATION	GOBP_MUSCLE_CELL_MIGRATION		25	0.394031	1.11154	0.287212	0.696218	1	376	tags=28%, list=14%, signal=32%
GOBP_LYMPHOCYTE_ACTIVATION	GOBP_LYMPHOCYTE_ACTIVATION		125	0.287505	1.11143	0.260274	0.6952	1	420	tags=19%, list=15%, signal=22%
GOBP_REGULATION_OF_ATP_METABOLIC_PROCESS	GOBP_REGULATION_OF_ATP_METABOLIC_PROCESS		30	0.358616	1.11079	0.274854	0.69578	1	437	tags=40%, list=16%, signal=47%
GOBP_BONE_MORPHOGENESIS	GOBP_BONE_MORPHOGENESIS		25	0.365381	1.11038	0.310345	0.695758	1	332	tags=28%, list=12%, signal=32%
GOBP_NEGATIVE_REGULATION_OF_PROTEIN_SERINE_THREONINE_KINASE_ACTIVITY	GOBP_NEGATIVE_REGULATION_OF_PROTEIN_SERINE_THREONINE_KINASE_ACTIVITY		25	0.357794	1.11013	0.292339	0.69518	1	167	tags=16%, list=6%, signal=17%
GOBP_ESTABLISHMENT_OF_ORGANELLE_LOCALIZATION	GOBP_ESTABLISHMENT_OF_ORGANELLE_LOCALIZATION		92	0.270308	1.10999	0.302083	0.694282	1	496	tags=23%, list=18%, signal=27%
GOBP_LOCOMOTION	GOBP_LOCOMOTION		370	0.253494	1.10954	0.206316	0.694262	1	502	tags=22%, list=18%, signal=23%
GOBP_ERBB_SIGNALING_PATHWAY	GOBP_ERBB_SIGNALING_PATHWAY		46	0.299153	1.10726	0.262042	0.699918	1	221	tags=15%, list=8%, signal=16%
GOBP_NEGATIVE_REGULATION_OF_MUSCLE_CELL_DIFFERENTIATION	GOBP_NEGATIVE_REGULATION_OF_MUSCLE_CELL_DIFFERENTIATION		16	0.407255	1.10696	0.315789	0.699501	1	385	tags=31%, list=14%, signal=36%
GOBP_CHONDROCYTE_DIFFERENTIATION	GOBP_CHONDROCYTE_DIFFERENTIATION		34	0.357777	1.10473	0.291985	0.705034	1	332	tags=21%, list=12%, signal=23%
GOBP_GRANULOCYTE_MIGRATION	GOBP_GRANULOCYTE_MIGRATION		22	0.393138	1.10456	0.305221	0.704166	1	411	tags=36%, list=15%, signal=42%
GOBP_NEGATIVE_REGULATION_OF_CELL_CYCLE	GOBP_NEGATIVE_REGULATION_OF_CELL_CYCLE		117	0.271924	1.10437	0.256757	0.703353	1	521	tags=26%, list=19%, signal=31%
GOBP_RESPONSE_TO_INTERFERON_GAMMA	GOBP_RESPONSE_TO_INTERFERON_GAMMA		41	0.37396	1.10405	0.309886	0.703015	1	604	tags=32%, list=22%, signal=40%
GOBP_PROTEIN_DEPOLYMERIZATION	GOBP_PROTEIN_DEPOLYMERIZATION		30	0.340683	1.10198	0.305155	0.70783	1	483	tags=33%, list=18%, signal=40%
GOCC_AUTOPHAGOSOME	GOCC_AUTOPHAGOSOME		15	0.370136	1.10163	0.314815	0.707569	1	488	tags=33%, list=18%, signal=40%
GOBP_NEGATIVE_REGULATION_OF_CYTOSKELETON_ORGANIZATION	GOBP_NEGATIVE_REGULATION_OF_CYTOSKELETON_ORGANIZATION		35	0.311972	1.10157	0.320717	0.706384	1	483	tags=26%, list=18%, signal=31%
GOBP_AMINOGLYCAN_METABOLIC_PROCESS	GOBP_AMINOGLYCAN_METABOLIC_PROCESS		39	0.334904	1.1013	0.302041	0.705881	1	425	tags=26%, list=16%, signal=30%
GOBP_RESPONSE_TO_RADIATION	GOBP_RESPONSE_TO_RADIATION		91	0.27895	1.10118	0.26294	0.704913	1	381	tags=19%, list=14%, signal=21%
GOBP_LYMPHOCYTE_ACTIVATION_INVOLVED_IN_IMMUNE_RESPONSE	GOBP_LYMPHOCYTE_ACTIVATION_INVOLVED_IN_IMMUNE_RESPONSE		29	0.360234	1.10069	0.31068	0.705116	1	406	tags=28%, list=15%, signal=32%
GOBP_MITOTIC_NUCLEAR_DIVISION	GOBP_MITOTIC_NUCLEAR_DIVISION		52	0.292152	1.10001	0.304	0.705886	1	742	tags=44%, list=27%, signal=60%
GOCC_CHROMOSOME	GOCC_CHROMOSOME		318	0.237813	1.09909	0.25	0.707425	1	598	tags=23%, list=22%, signal=26%
GOBP_NEGATIVE_REGULATION_OF_PHOSPHORUS_METABOLIC_PROCESS	GOBP_NEGATIVE_REGULATION_OF_PHOSPHORUS_METABOLIC_PROCESS		86	0.259985	1.09906	0.272349	0.70619	1	289	tags=15%, list=11%, signal=16%
GOCC_CELL_SUBSTRATE_JUNCTION	GOCC_CELL_SUBSTRATE_JUNCTION		120	0.254312	1.09904	0.286004	0.704941	1	479	tags=22%, list=18%, signal=25%
GOBP_POSITIVE_REGULATION_OF_CYTOKINE_PRODUCTION	GOBP_POSITIVE_REGULATION_OF_CYTOKINE_PRODUCTION		81	0.293869	1.09852	0.284872	0.705117	1	604	tags=28%, list=22%, signal=35%
GOBP_NEGATIVE_REGULATION_OF_SECRETION	GOBP_NEGATIVE_REGULATION_OF_SECRETION		22	0.367297	1.0984	0.295316	0.704138	1	155	tags=18%, list=6%, signal=19%
GOMF_ORGANIC_ACID_BINDING	GOMF_ORGANIC_ACID_BINDING		20	0.383194	1.09802	0.323353	0.70405	1	243	tags=20%, list=9%, signal=22%
GOBP_CELLULAR_RESPONSE_TO_ABIOTIC_STIMULUS	GOBP_CELLULAR_RESPONSE_TO_ABIOTIC_STIMULUS		75	0.269815	1.09771	0.287149	0.703759	1	294	tags=13%, list=11%, signal=15%
GOBP_MUCOPOLYSACCHARIDE_METABOLIC_PROCESS	GOBP_MUCOPOLYSACCHARIDE_METABOLIC_PROCESS		30	0.358171	1.0969	0.313131	0.705002	1	425	tags=27%, list=16%, signal=31%
GOBP_POSITIVE_REGULATION_OF_CELL_SUBSTRATE_ADHESION	GOBP_POSITIVE_REGULATION_OF_CELL_SUBSTRATE_ADHESION		29	0.373507	1.09632	0.312115	0.705469	1	251	tags=17%, list=9%, signal=19%
GOBP_RETINA_MORPHOGENESIS_IN_CAMERA_TYPE_EYE	GOBP_RETINA_MORPHOGENESIS_IN_CAMERA_TYPE_EYE		16	0.390344	1.09594	0.343096	0.705387	1	253	tags=19%, list=9%, signal=21%
GOBP_POSITIVE_REGULATION_OF_VIRAL_PROCESS	GOBP_POSITIVE_REGULATION_OF_VIRAL_PROCESS		16	0.358041	1.09522	0.368627	0.706305	1	438	tags=38%, list=16%, signal=44%
GOBP_GRANULOCYTE_CHEMOTAXIS	GOBP_GRANULOCYTE_CHEMOTAXIS		21	0.397257	1.09507	0.317269	0.705486	1	411	tags=38%, list=15%, signal=45%
GOBP_CRANIAL_NERVE_DEVELOPMENT	GOBP_CRANIAL_NERVE_DEVELOPMENT		16	0.367928	1.09294	0.332657	0.710734	1	316	tags=25%, list=12%, signal=28%
GOBP_LEUKOCYTE_MIGRATION	GOBP_LEUKOCYTE_MIGRATION		68	0.309489	1.09256	0.292434	0.710626	1	502	tags=26%, list=18%, signal=32%
GOBP_DIGESTIVE_SYSTEM_DEVELOPMENT	GOBP_DIGESTIVE_SYSTEM_DEVELOPMENT		30	0.357802	1.09215	0.30101	0.710437	1	455	tags=20%, list=17%, signal=24%
GOBP_REGULATION_OF_TRANSPORT	GOBP_REGULATION_OF_TRANSPORT		354	0.221788	1.09096	0.211268	0.712818	1	502	tags=21%, list=18%, signal=23%
GOBP_CELLULAR_RESPONSE_TO_HORMONE_STIMULUS	GOBP_CELLULAR_RESPONSE_TO_HORMONE_STIMULUS		140	0.258443	1.09096	0.304527	0.711528	1	515	tags=25%, list=19%, signal=29%
GOBP_ANATOMICAL_STRUCTURE_FORMATION_INVOLVED_IN_MORPHOGENESIS	GOBP_ANATOMICAL_STRUCTURE_FORMATION_INVOLVED_IN_MORPHOGENESIS		247	0.249022	1.09047	0.25	0.71165	1	598	tags=26%, list=22%, signal=31%
GOBP_PROTEIN_LOCALIZATION_TO_VACUOLE	GOBP_PROTEIN_LOCALIZATION_TO_VACUOLE		17	0.411745	1.09038	0.346979	0.71065	1	454	tags=41%, list=17%, signal=49%
GOMF_CARBOXYLIC_ACID_BINDING	GOMF_CARBOXYLIC_ACID_BINDING		30	0.350759	1.09029	0.306773	0.709668	1	321	tags=20%, list=12%, signal=22%
GOBP_REGULATION_OF_ALCOHOL_BIOSYNTHETIC_PROCESS	GOBP_REGULATION_OF_ALCOHOL_BIOSYNTHETIC_PROCESS		22	0.379407	1.08967	0.345083	0.710317	1	594	tags=32%, list=22%, signal=40%
GOBP_SECOND_MESSENGER_MEDIATED_SIGNALING	GOBP_SECOND_MESSENGER_MEDIATED_SIGNALING		67	0.294903	1.08877	0.30137	0.711564	1	421	tags=24%, list=15%, signal=28%
GOBP_BIOLOGICAL_ADHESION	GOBP_BIOLOGICAL_ADHESION		305	0.252466	1.08824	0.24477	0.711931	1	375	tags=16%, list=14%, signal=17%
GOBP_REGULATION_OF_PEPTIDE_TRANSPORT	GOBP_REGULATION_OF_PEPTIDE_TRANSPORT		125	0.244647	1.08802	0.266529	0.711297	1	515	tags=24%, list=19%, signal=28%
GOBP_REGULATION_OF_ANION_TRANSPORT	GOBP_REGULATION_OF_ANION_TRANSPORT		173	0.2422	1.08778	0.251572	0.710768	1	515	tags=25%, list=19%, signal=29%
GOBP_NEGATIVE_REGULATION_OF_TRANSPORT	GOBP_NEGATIVE_REGULATION_OF_TRANSPORT		71	0.271977	1.08634	0.31185	0.71383	1	485	tags=23%, list=18%, signal=27%
GOBP_POSITIVE_REGULATION_OF_TYPE_I_INTERFERON_PRODUCTION	GOBP_POSITIVE_REGULATION_OF_TYPE_I_INTERFERON_PRODUCTION		20	0.377543	1.08492	0.389558	0.716791	1	639	tags=40%, list=23%, signal=52%
GOBP_CELL_ADHESION_MEDIATED_BY_INTEGRIN	GOBP_CELL_ADHESION_MEDIATED_BY_INTEGRIN		15	0.436217	1.08427	0.359281	0.717455	1	364	tags=33%, list=13%, signal=38%
GOBP_REGULATION_OF_SMOOTHENED_SIGNALING_PATHWAY	GOBP_REGULATION_OF_SMOOTHENED_SIGNALING_PATHWAY		22	0.359043	1.08345	0.344196	0.718678	1	294	tags=23%, list=11%, signal=25%
GOBP_NEGATIVE_REGULATION_OF_CELL_CYCLE_PHASE_TRANSITION	GOBP_NEGATIVE_REGULATION_OF_CELL_CYCLE_PHASE_TRANSITION		49	0.28948	1.08326	0.297349	0.71804	1	512	tags=31%, list=19%, signal=37%
GOBP_REGULATION_OF_NUCLEAR_DIVISION	GOBP_REGULATION_OF_NUCLEAR_DIVISION		32	0.358552	1.08052	0.328482	0.72527	1	510	tags=34%, list=19%, signal=42%
GOBP_CARDIAC_MUSCLE_TISSUE_DEVELOPMENT	GOBP_CARDIAC_MUSCLE_TISSUE_DEVELOPMENT		50	0.307519	1.07839	0.309091	0.730522	1	463	tags=26%, list=17%, signal=31%
GOBP_NIK_NF_KAPPAB_SIGNALING	GOBP_NIK_NF_KAPPAB_SIGNALING		30	0.294595	1.07791	0.33264	0.730701	1	762	tags=33%, list=28%, signal=46%
GOCC_SECRETORY_GRANULE_MEMBRANE	GOCC_SECRETORY_GRANULE_MEMBRANE		57	0.294902	1.07776	0.347222	0.729874	1	479	tags=25%, list=18%, signal=29%
GOBP_RESPONSE_TO_FIBROBLAST_GROWTH_FACTOR	GOBP_RESPONSE_TO_FIBROBLAST_GROWTH_FACTOR		26	0.367001	1.07713	0.334601	0.730446	1	221	tags=15%, list=8%, signal=17%
GOBP_PEPTIDE_SECRETION	GOBP_PEPTIDE_SECRETION		71	0.272405	1.07661	0.295082	0.730749	1	130	tags=11%, list=5%, signal=12%
GOBP_REGULATION_OF_CHROMOSOME_SEGREGATION	GOBP_REGULATION_OF_CHROMOSOME_SEGREGATION		19	0.385635	1.07652	0.377432	0.729769	1	510	tags=37%, list=19%, signal=45%
GOBP_MITOTIC_SPINDLE_ORGANIZATION	GOBP_MITOTIC_SPINDLE_ORGANIZATION		21	0.357462	1.07591	0.351464	0.730347	1	690	tags=48%, list=25%, signal=63%
GOBP_BLOOD_VESSEL_ENDOTHELIAL_CELL_MIGRATION	GOBP_BLOOD_VESSEL_ENDOTHELIAL_CELL_MIGRATION		27	0.356358	1.07487	0.341463	0.732168	1	493	tags=37%, list=18%, signal=45%
GOBP_REGULATION_OF_PROTEIN_SERINE_THREONINE_KINASE_ACTIVITY	GOBP_REGULATION_OF_PROTEIN_SERINE_THREONINE_KINASE_ACTIVITY		96	0.269219	1.07466	0.304094	0.731555	1	539	tags=27%, list=20%, signal=33%
GOBP_NEGATIVE_REGULATION_OF_BIOSYNTHETIC_PROCESS	GOBP_NEGATIVE_REGULATION_OF_BIOSYNTHETIC_PROCESS		312	0.235579	1.07413	0.285996	0.731782	1	586	tags=24%, list=22%, signal=27%
GOBP_NEGATIVE_REGULATION_OF_PROTEIN_POLYMERIZATION	GOBP_NEGATIVE_REGULATION_OF_PROTEIN_POLYMERIZATION		19	0.337143	1.07384	0.34252	0.731428	1	483	tags=26%, list=18%, signal=32%
GOBP_AMINE_METABOLIC_PROCESS	GOBP_AMINE_METABOLIC_PROCESS		27	0.328856	1.07347	0.394059	0.731253	1	447	tags=19%, list=16%, signal=22%
GOBP_CELL_CYCLE_G2_M_PHASE_TRANSITION	GOBP_CELL_CYCLE_G2_M_PHASE_TRANSITION		51	0.298164	1.07208	0.36811	0.73427	1	477	tags=25%, list=18%, signal=30%
GOMF_DNA_HELICASE_ACTIVITY	GOMF_DNA_HELICASE_ACTIVITY		15	0.369721	1.07208	0.361446	0.733003	1	168	tags=13%, list=6%, signal=14%
GOBP_SMOOTH_MUSCLE_CELL_MIGRATION	GOBP_SMOOTH_MUSCLE_CELL_MIGRATION		21	0.396775	1.07173	0.333333	0.732711	1	376	tags=29%, list=14%, signal=33%
GOBP_RESPONSE_TO_NITROGEN_COMPOUND	GOBP_RESPONSE_TO_NITROGEN_COMPOUND		228	0.231601	1.07109	0.292829	0.733367	1	504	tags=23%, list=19%, signal=26%
GOBP_REGULATION_OF_CELLULAR_COMPONENT_MOVEMENT	GOBP_REGULATION_OF_CELLULAR_COMPONENT_MOVEMENT		226	0.26429	1.07106	0.321503	0.732205	1	478	tags=22%, list=18%, signal=24%
GOBP_REGULATION_OF_LAMELLIPODIUM_ORGANIZATION	GOBP_REGULATION_OF_LAMELLIPODIUM_ORGANIZATION		17	0.40983	1.07103	0.342324	0.731039	1	172	tags=18%, list=6%, signal=19%
GOBP_REGULATION_OF_CELL_MORPHOGENESIS	GOBP_REGULATION_OF_CELL_MORPHOGENESIS		67	0.279547	1.06997	0.333333	0.7329	1	461	tags=22%, list=17%, signal=26%
GOBP_SENSORY_SYSTEM_DEVELOPMENT	GOBP_SENSORY_SYSTEM_DEVELOPMENT		75	0.280174	1.06822	0.370518	0.736969	1	433	tags=21%, list=16%, signal=25%
GOBP_B_CELL_ACTIVATION	GOBP_B_CELL_ACTIVATION		41	0.316718	1.06742	0.343689	0.737991	1	117	tags=10%, list=4%, signal=10%
GOBP_REGULATION_OF_OSSIFICATION	GOBP_REGULATION_OF_OSSIFICATION		23	0.365784	1.06696	0.34879	0.738137	1	115	tags=13%, list=4%, signal=14%
GOBP_REGULATION_OF_CHROMOSOME_SEPARATION	GOBP_REGULATION_OF_CHROMOSOME_SEPARATION		18	0.390327	1.06528	0.39265	0.742026	1	510	tags=39%, list=19%, signal=48%
GOBP_POSITIVE_REGULATION_OF_CELL_DIFFERENTIATION	GOBP_POSITIVE_REGULATION_OF_CELL_DIFFERENTIATION		183	0.241239	1.06525	0.308448	0.740856	1	437	tags=20%, list=16%, signal=22%
GOBP_SENSORY_ORGAN_MORPHOGENESIS	GOBP_SENSORY_ORGAN_MORPHOGENESIS		55	0.326035	1.06522	0.336694	0.739697	1	522	tags=25%, list=19%, signal=31%
GOMF_ENZYME_BINDING	GOMF_ENZYME_BINDING		425	0.214164	1.0649	0.301426	0.739397	1	550	tags=23%, list=20%, signal=25%
GOBP_POSITIVE_REGULATION_OF_INTRACELLULAR_TRANSPORT	GOBP_POSITIVE_REGULATION_OF_INTRACELLULAR_TRANSPORT		58	0.272514	1.06456	0.349495	0.739147	1	427	tags=22%, list=16%, signal=26%
GOBP_CARDIOCYTE_DIFFERENTIATION	GOBP_CARDIOCYTE_DIFFERENTIATION		31	0.341407	1.06448	0.34375	0.738141	1	455	tags=32%, list=17%, signal=38%
GOBP_CELLULAR_RESPONSE_TO_STARVATION	GOBP_CELLULAR_RESPONSE_TO_STARVATION		28	0.347307	1.0643	0.338521	0.737433	1	382	tags=25%, list=14%, signal=29%
GOBP_BLOOD_VESSEL_MORPHOGENESIS	GOBP_BLOOD_VESSEL_MORPHOGENESIS		150	0.261312	1.06359	0.310345	0.73828	1	493	tags=23%, list=18%, signal=27%
GOCC_AZUROPHIL_GRANULE	GOCC_AZUROPHIL_GRANULE		33	0.30836	1.06251	0.356736	0.740366	1	509	tags=27%, list=19%, signal=33%
GOBP_REGULATION_OF_RECEPTOR_MEDIATED_ENDOCYTOSIS	GOBP_REGULATION_OF_RECEPTOR_MEDIATED_ENDOCYTOSIS		23	0.354227	1.06172	0.378431	0.741553	1	1024	tags=48%, list=38%, signal=76%
GOBP_VENTRICULAR_SEPTUM_DEVELOPMENT	GOBP_VENTRICULAR_SEPTUM_DEVELOPMENT		25	0.358531	1.06151	0.355769	0.740922	1	219	tags=16%, list=8%, signal=17%
GOBP_CHROMOSOME_SEGREGATION	GOBP_CHROMOSOME_SEGREGATION		58	0.284704	1.06079	0.328685	0.741896	1	533	tags=24%, list=20%, signal=29%
GOBP_NEGATIVE_REGULATION_OF_INTRACELLULAR_SIGNAL_TRANSDUCTION	GOBP_NEGATIVE_REGULATION_OF_INTRACELLULAR_SIGNAL_TRANSDUCTION		97	0.251962	1.05999	0.338645	0.743162	1	519	tags=22%, list=19%, signal=26%
GOBP_RESPONSE_TO_IONIZING_RADIATION	GOBP_RESPONSE_TO_IONIZING_RADIATION		29	0.347768	1.0585	0.354906	0.746408	1	345	tags=17%, list=13%, signal=20%
GOBP_CENTRAL_NERVOUS_SYSTEM_NEURON_DIFFERENTIATION	GOBP_CENTRAL_NERVOUS_SYSTEM_NEURON_DIFFERENTIATION		45	0.306956	1.05847	0.365805	0.745257	1	289	tags=16%, list=11%, signal=17%
GOBP_PROTEIN_ACETYLATION	GOBP_PROTEIN_ACETYLATION		36	0.281324	1.05744	0.354709	0.747025	1	566	tags=25%, list=21%, signal=31%
GOBP_SEGMENTATION	GOBP_SEGMENTATION		16	0.401894	1.05725	0.3762	0.746391	1	228	tags=19%, list=8%, signal=20%
GOBP_AMINOGLYCAN_BIOSYNTHETIC_PROCESS	GOBP_AMINOGLYCAN_BIOSYNTHETIC_PROCESS		28	0.343899	1.05696	0.363636	0.746034	1	425	tags=29%, list=16%, signal=34%
GOBP_REGULATION_OF_DNA_REPAIR	GOBP_REGULATION_OF_DNA_REPAIR		24	0.301237	1.05606	0.359438	0.747426	1	631	tags=33%, list=23%, signal=43%
GOCC_NEUROMUSCULAR_JUNCTION	GOCC_NEUROMUSCULAR_JUNCTION		17	0.371732	1.05593	0.340726	0.746602	1	60	tags=12%, list=2%, signal=12%
GOCC_NEURON_PROJECTION_TERMINUS	GOCC_NEURON_PROJECTION_TERMINUS		28	0.375513	1.05563	0.373967	0.746332	1	711	tags=36%, list=26%, signal=48%
GOBP_REGULATION_OF_B_CELL_ACTIVATION	GOBP_REGULATION_OF_B_CELL_ACTIVATION		20	0.376465	1.05516	0.394841	0.746522	1	50	tags=10%, list=2%, signal=10%
GOBP_OSTEOCLAST_DIFFERENTIATION	GOBP_OSTEOCLAST_DIFFERENTIATION		22	0.358944	1.05456	0.365462	0.74706	1	419	tags=27%, list=15%, signal=32%
GOBP_CARDIAC_SEPTUM_DEVELOPMENT	GOBP_CARDIAC_SEPTUM_DEVELOPMENT		33	0.330452	1.05422	0.380682	0.746882	1	248	tags=15%, list=9%, signal=16%
GOBP_REGULATION_OF_MUSCLE_CELL_DIFFERENTIATION	GOBP_REGULATION_OF_MUSCLE_CELL_DIFFERENTIATION		35	0.304067	1.05286	0.380228	0.749631	1	566	tags=37%, list=21%, signal=46%
GOMF_ENZYME_ACTIVATOR_ACTIVITY	GOMF_ENZYME_ACTIVATOR_ACTIVITY		103	0.245019	1.05145	0.342159	0.752755	1	327	tags=18%, list=12%, signal=20%
GOBP_DOUBLE_STRAND_BREAK_REPAIR	GOBP_DOUBLE_STRAND_BREAK_REPAIR		39	0.310812	1.0511	0.391389	0.752593	1	679	tags=33%, list=25%, signal=44%
GOBP_PRI_MIRNA_TRANSCRIPTION_BY_RNA_POLYMERASE_II	GOBP_PRI_MIRNA_TRANSCRIPTION_BY_RNA_POLYMERASE_II		15	0.382073	1.05063	0.374732	0.752782	1	363	tags=20%, list=13%, signal=23%
GOBP_REGULATION_OF_ERBB_SIGNALING_PATHWAY	GOBP_REGULATION_OF_ERBB_SIGNALING_PATHWAY		31	0.301216	1.04982	0.374257	0.753902	1	221	tags=16%, list=8%, signal=17%
GOBP_ADAPTIVE_IMMUNE_RESPONSE	GOBP_ADAPTIVE_IMMUNE_RESPONSE		64	0.320822	1.04942	0.362173	0.754021	1	419	tags=20%, list=15%, signal=23%
GOBP_EXTRINSIC_APOPTOTIC_SIGNALING_PATHWAY_VIA_DEATH_DOMAIN_RECEPTORS	GOBP_EXTRINSIC_APOPTOTIC_SIGNALING_PATHWAY_VIA_DEATH_DOMAIN_RECEPTORS		23	0.333045	1.04883	0.378758	0.754665	1	311	tags=17%, list=11%, signal=19%
GOBP_REGULATION_OF_VASCULATURE_DEVELOPMENT	GOBP_REGULATION_OF_VASCULATURE_DEVELOPMENT		55	0.29124	1.0481	0.353535	0.755668	1	455	tags=24%, list=17%, signal=28%
GOBP_MYELOID_LEUKOCYTE_MEDIATED_IMMUNITY	GOBP_MYELOID_LEUKOCYTE_MEDIATED_IMMUNITY		102	0.271813	1.04737	0.378218	0.756812	1	613	tags=26%, list=23%, signal=33%
GOBP_POSITIVE_REGULATION_OF_INTRACELLULAR_PROTEIN_TRANSPORT	GOBP_POSITIVE_REGULATION_OF_INTRACELLULAR_PROTEIN_TRANSPORT		47	0.285131	1.04715	0.368209	0.756214	1	427	tags=26%, list=16%, signal=30%
GOBP_POSITIVE_REGULATION_OF_RESPONSE_TO_WOUNDING	GOBP_POSITIVE_REGULATION_OF_RESPONSE_TO_WOUNDING		18	0.365893	1.047	0.39759	0.755462	1	725	tags=33%, list=27%, signal=45%
GOBP_NEGATIVE_REGULATION_OF_PROTEIN_CATABOLIC_PROCESS	GOBP_NEGATIVE_REGULATION_OF_PROTEIN_CATABOLIC_PROCESS		35	0.286417	1.04698	0.406814	0.754317	1	135	tags=11%, list=5%, signal=12%
GOBP_GLYCOSYLATION	GOBP_GLYCOSYLATION		40	0.308747	1.04663	0.348	0.754198	1	108	tags=10%, list=4%, signal=10%
GOBP_ANTEROGRADE_AXONAL_TRANSPORT	GOBP_ANTEROGRADE_AXONAL_TRANSPORT		15	0.376689	1.04612	0.435065	0.754625	1	442	tags=27%, list=16%, signal=32%
GOBP_SENSORY_PERCEPTION_OF_PAIN	GOBP_SENSORY_PERCEPTION_OF_PAIN		21	0.377209	1.04605	0.406504	0.753634	1	544	tags=38%, list=20%, signal=47%
GOBP_TRANSMEMBRANE_RECEPTOR_PROTEIN_TYROSINE_KINASE_SIGNALING_PATHWAY	GOBP_TRANSMEMBRANE_RECEPTOR_PROTEIN_TYROSINE_KINASE_SIGNALING_PATHWAY		171	0.243131	1.04591	0.35167	0.752884	1	504	tags=22%, list=19%, signal=25%
GOBP_DEFENSE_RESPONSE	GOBP_DEFENSE_RESPONSE		264	0.25056	1.045	0.387674	0.754378	1	419	tags=17%, list=15%, signal=18%
GOBP_DNA_DAMAGE_RESPONSE_SIGNAL_TRANSDUCTION_BY_P53_CLASS_MEDIATOR	GOBP_DNA_DAMAGE_RESPONSE_SIGNAL_TRANSDUCTION_BY_P53_CLASS_MEDIATOR		25	0.338357	1.04482	0.365613	0.75372	1	307	tags=24%, list=11%, signal=27%
GOBP_REGULATION_OF_CATABOLIC_PROCESS	GOBP_REGULATION_OF_CATABOLIC_PROCESS		222	0.213789	1.04461	0.343035	0.753154	1	471	tags=21%, list=17%, signal=24%
GOBP_RESPONSE_TO_OXYGEN_CONTAINING_COMPOUND	GOBP_RESPONSE_TO_OXYGEN_CONTAINING_COMPOUND		333	0.219825	1.0446	0.333333	0.751991	1	521	tags=23%, list=19%, signal=25%
GOBP_REGULATION_OF_CELL_PROJECTION_ASSEMBLY	GOBP_REGULATION_OF_CELL_PROJECTION_ASSEMBLY		39	0.328232	1.04451	0.379518	0.75103	1	316	tags=18%, list=12%, signal=20%
GOBP_REGULATION_OF_ION_TRANSPORT	GOBP_REGULATION_OF_ION_TRANSPORT		261	0.217604	1.04414	0.313765	0.750955	1	521	tags=24%, list=19%, signal=27%
GOBP_FIBROBLAST_GROWTH_FACTOR_RECEPTOR_SIGNALING_PATHWAY	GOBP_FIBROBLAST_GROWTH_FACTOR_RECEPTOR_SIGNALING_PATHWAY		18	0.380386	1.04337	0.390892	0.752047	1	221	tags=17%, list=8%, signal=18%
GOBP_INTRACELLULAR_TRANSPORT	GOBP_INTRACELLULAR_TRANSPORT		346	0.195796	1.04309	0.353057	0.751685	1	465	tags=18%, list=17%, signal=19%
GOBP_MACROMOLECULE_CATABOLIC_PROCESS	GOBP_MACROMOLECULE_CATABOLIC_PROCESS		291	0.198342	1.04005	0.384929	0.759542	1	533	tags=19%, list=20%, signal=21%
GOBP_ORGANELLE_ASSEMBLY	GOBP_ORGANELLE_ASSEMBLY		148	0.219254	1.0396	0.358717	0.75963	1	545	tags=22%, list=20%, signal=26%
GOCC_HISTONE_DEACETYLASE_COMPLEX	GOCC_HISTONE_DEACETYLASE_COMPLEX		20	0.344736	1.03943	0.410359	0.758913	1	131	tags=15%, list=5%, signal=16%
GOBP_CELLULAR_HORMONE_METABOLIC_PROCESS	GOBP_CELLULAR_HORMONE_METABOLIC_PROCESS		23	0.367254	1.03884	0.392857	0.759383	1	584	tags=39%, list=21%, signal=49%
GOBP_UROGENITAL_SYSTEM_DEVELOPMENT	GOBP_UROGENITAL_SYSTEM_DEVELOPMENT		73	0.30866	1.03858	0.37605	0.758957	1	597	tags=30%, list=22%, signal=38%
GOBP_LIPID_LOCALIZATION	GOBP_LIPID_LOCALIZATION		98	0.261315	1.0385	0.369835	0.757947	1	421	tags=20%, list=15%, signal=23%
GOBP_TYPE_I_INTERFERON_PRODUCTION	GOBP_TYPE_I_INTERFERON_PRODUCTION		28	0.317387	1.03812	0.407186	0.757916	1	639	tags=36%, list=23%, signal=46%
GOCC_BRUSH_BORDER_MEMBRANE	GOCC_BRUSH_BORDER_MEMBRANE		18	0.385472	1.03812	0.376471	0.756734	1	395	tags=28%, list=15%, signal=32%
GOMF_UDP_GLYCOSYLTRANSFERASE_ACTIVITY	GOMF_UDP_GLYCOSYLTRANSFERASE_ACTIVITY		21	0.380893	1.0381	0.413174	0.755602	1	251	tags=19%, list=9%, signal=21%
GOBP_VESICLE_ORGANIZATION	GOBP_VESICLE_ORGANIZATION		67	0.271274	1.03746	0.416503	0.756451	1	485	tags=24%, list=18%, signal=28%
GOBP_REGULATION_OF_NEURON_DIFFERENTIATION	GOBP_REGULATION_OF_NEURON_DIFFERENTIATION		53	0.28426	1.03744	0.389113	0.755316	1	337	tags=17%, list=12%, signal=19%
GOBP_CELLULAR_PROCESS_INVOLVED_IN_REPRODUCTION_IN_MULTICELLULAR_ORGANISM	GOBP_CELLULAR_PROCESS_INVOLVED_IN_REPRODUCTION_IN_MULTICELLULAR_ORGANISM		64	0.282238	1.03687	0.382046	0.755838	1	449	tags=25%, list=16%, signal=29%
GOMF_PHOSPHOLIPID_BINDING	GOMF_PHOSPHOLIPID_BINDING		87	0.260096	1.03657	0.396266	0.75555	1	485	tags=23%, list=18%, signal=27%
GOBP_RESPONSE_TO_STARVATION	GOBP_RESPONSE_TO_STARVATION		34	0.319771	1.0359	0.374517	0.756341	1	382	tags=24%, list=14%, signal=27%
GOBP_NEURON_DEVELOPMENT	GOBP_NEURON_DEVELOPMENT		252	0.209202	1.03573	0.334669	0.75572	1	364	tags=14%, list=13%, signal=15%
GOBP_CARDIAC_CHAMBER_DEVELOPMENT	GOBP_CARDIAC_CHAMBER_DEVELOPMENT		40	0.315413	1.03561	0.418972	0.754899	1	529	tags=25%, list=19%, signal=31%
GOBP_BONE_REMODELING	GOBP_BONE_REMODELING		20	0.372186	1.03552	0.395582	0.754032	1	17	tags=10%, list=1%, signal=10%
GOBP_NEGATIVE_REGULATION_OF_ION_TRANSPORT	GOBP_NEGATIVE_REGULATION_OF_ION_TRANSPORT		48	0.274909	1.03525	0.419552	0.75365	1	485	tags=23%, list=18%, signal=27%
GOBP_RESPONSE_TO_OSMOTIC_STRESS	GOBP_RESPONSE_TO_OSMOTIC_STRESS		19	0.34379	1.03497	0.382979	0.753349	1	593	tags=37%, list=22%, signal=47%
GOCC_CHROMATIN	GOCC_CHROMATIN		235	0.228416	1.03491	0.335878	0.752384	1	482	tags=18%, list=18%, signal=20%
GOBP_STRIATED_MUSCLE_CELL_DIFFERENTIATION	GOBP_STRIATED_MUSCLE_CELL_DIFFERENTIATION		65	0.269302	1.03476	0.402834	0.751711	1	580	tags=32%, list=21%, signal=40%
GOBP_REGULATION_OF_ANATOMICAL_STRUCTURE_MORPHOGENESIS	GOBP_REGULATION_OF_ANATOMICAL_STRUCTURE_MORPHOGENESIS		211	0.22689	1.03412	0.348089	0.75233	1	464	tags=20%, list=17%, signal=22%
GOBP_NEUROGENESIS	GOBP_NEUROGENESIS		370	0.212849	1.03399	0.33617	0.751555	1	399	tags=16%, list=15%, signal=16%
GOBP_POSITIVE_REGULATION_OF_NEURON_DIFFERENTIATION	GOBP_POSITIVE_REGULATION_OF_NEURON_DIFFERENTIATION		25	0.343273	1.03389	0.409543	0.750677	1	115	tags=16%, list=4%, signal=17%
GOCC_PML_BODY	GOCC_PML_BODY		28	0.290868	1.03276	0.391051	0.752911	1	812	tags=39%, list=30%, signal=55%
GOMF_COLLAGEN_BINDING	GOMF_COLLAGEN_BINDING		17	0.414338	1.03243	0.401261	0.752773	1	261	tags=24%, list=10%, signal=26%
GOBP_SKIN_DEVELOPMENT	GOBP_SKIN_DEVELOPMENT		58	0.288966	1.03225	0.377871	0.752141	1	299	tags=16%, list=11%, signal=17%
GOBP_INFLAMMATORY_RESPONSE	GOBP_INFLAMMATORY_RESPONSE		120	0.250923	1.0312	0.389433	0.754112	1	485	tags=21%, list=18%, signal=24%
GOMF_TRANSCRIPTION_COREPRESSOR_ACTIVITY	GOMF_TRANSCRIPTION_COREPRESSOR_ACTIVITY		38	0.299024	1.03084	0.406883	0.754025	1	836	tags=47%, list=31%, signal=67%
GOBP_REGULATION_OF_ORGANELLE_ORGANIZATION	GOBP_REGULATION_OF_ORGANELLE_ORGANIZATION		235	0.23187	1.03069	0.393509	0.753274	1	545	tags=24%, list=20%, signal=27%
GOMF_GTPASE_ACTIVATOR_ACTIVITY	GOMF_GTPASE_ACTIVATOR_ACTIVITY		50	0.28466	1.03053	0.393478	0.75265	1	327	tags=20%, list=12%, signal=22%
GOCC_GOLGI_STACK	GOCC_GOLGI_STACK		27	0.323259	1.03013	0.434343	0.752667	1	91	tags=11%, list=3%, signal=11%
GOBP_MACROMOLECULE_METHYLATION	GOBP_MACROMOLECULE_METHYLATION		38	0.309889	1.02993	0.418327	0.752096	1	521	tags=24%, list=19%, signal=29%
GOCC_ENDOPLASMIC_RETICULUM	GOCC_ENDOPLASMIC_RETICULUM		309	0.231848	1.02958	0.396078	0.752034	1	517	tags=20%, list=19%, signal=22%
GOBP_REGULATION_OF_LEUKOCYTE_PROLIFERATION	GOBP_REGULATION_OF_LEUKOCYTE_PROLIFERATION		40	0.320723	1.02909	0.411881	0.752285	1	116	tags=13%, list=4%, signal=13%
GOBP_NEURON_PROJECTION_EXTENSION	GOBP_NEURON_PROJECTION_EXTENSION		44	0.27676	1.02908	0.400391	0.751197	1	240	tags=11%, list=9%, signal=12%
GOBP_CYTOSOLIC_TRANSPORT	GOBP_CYTOSOLIC_TRANSPORT		43	0.279448	1.02859	0.412602	0.751525	1	454	tags=16%, list=17%, signal=19%
GOBP_MEMBRANE_ORGANIZATION	GOBP_MEMBRANE_ORGANIZATION		179	0.221434	1.02799	0.388	0.752126	1	497	tags=23%, list=18%, signal=26%
GOBP_RESPONSE_TO_MOLECULE_OF_BACTERIAL_ORIGIN	GOBP_RESPONSE_TO_MOLECULE_OF_BACTERIAL_ORIGIN		60	0.265168	1.02779	0.372816	0.751608	1	411	tags=20%, list=15%, signal=23%
GOBP_NEURON_DIFFERENTIATION	GOBP_NEURON_DIFFERENTIATION		309	0.210289	1.02754	0.374245	0.751204	1	364	tags=15%, list=13%, signal=15%
GOBP_POSITIVE_REGULATION_OF_RESPONSE_TO_EXTERNAL_STIMULUS	GOBP_POSITIVE_REGULATION_OF_RESPONSE_TO_EXTERNAL_STIMULUS		90	0.254145	1.02747	0.393939	0.750275	1	411	tags=16%, list=15%, signal=18%
GOBP_RESPONSE_TO_METAL_ION	GOBP_RESPONSE_TO_METAL_ION		89	0.24905	1.02721	0.380762	0.749948	1	493	tags=21%, list=18%, signal=25%
GOBP_SEQUESTERING_OF_CALCIUM_ION	GOBP_SEQUESTERING_OF_CALCIUM_ION		21	0.301215	1.02655	0.422449	0.750765	1	834	tags=48%, list=31%, signal=68%
GOBP_POSITIVE_REGULATION_OF_HYDROLASE_ACTIVITY	GOBP_POSITIVE_REGULATION_OF_HYDROLASE_ACTIVITY		150	0.222847	1.02595	0.389006	0.751468	1	363	tags=17%, list=13%, signal=18%
GOCC_VESICLE_LUMEN	GOCC_VESICLE_LUMEN		62	0.289176	1.02448	0.421687	0.75462	1	725	tags=34%, list=27%, signal=45%
GOBP_MULTICELLULAR_ORGANISMAL_HOMEOSTASIS	GOBP_MULTICELLULAR_ORGANISMAL_HOMEOSTASIS		108	0.278764	1.0237	0.394366	0.755852	1	437	tags=21%, list=16%, signal=24%
GOBP_DNA_BIOSYNTHETIC_PROCESS	GOBP_DNA_BIOSYNTHETIC_PROCESS		35	0.306571	1.0233	0.40159	0.756038	1	768	tags=43%, list=28%, signal=59%
GOBP_NEUTROPHIL_MIGRATION	GOBP_NEUTROPHIL_MIGRATION		16	0.399338	1.02286	0.414433	0.756239	1	732	tags=69%, list=27%, signal=93%
GOBP_POSITIVE_REGULATION_OF_TRANSPORT	GOBP_POSITIVE_REGULATION_OF_TRANSPORT		191	0.22691	1.02285	0.378723	0.755164	1	435	tags=19%, list=16%, signal=21%
GOCC_CENTROSOME	GOCC_CENTROSOME		95	0.267644	1.02125	0.412475	0.758691	1	322	tags=17%, list=12%, signal=18%
GOBP_TUBE_DEVELOPMENT	GOBP_TUBE_DEVELOPMENT		234	0.23675	1.02004	0.409274	0.761156	1	478	tags=21%, list=18%, signal=23%
GOMF_IRON_ION_BINDING	GOMF_IRON_ION_BINDING		20	0.363736	1.01854	0.435897	0.764406	1	474	tags=30%, list=17%, signal=36%
GOBP_POSITIVE_REGULATION_OF_CELL_ADHESION	GOBP_POSITIVE_REGULATION_OF_CELL_ADHESION		92	0.269314	1.01844	0.429423	0.763589	1	330	tags=16%, list=12%, signal=18%
GOBP_RESPONSE_TO_ORGANIC_CYCLIC_COMPOUND	GOBP_RESPONSE_TO_ORGANIC_CYCLIC_COMPOUND		182	0.234752	1.01751	0.375	0.765333	1	466	tags=21%, list=17%, signal=24%
GOBP_CARDIAC_CELL_DEVELOPMENT	GOBP_CARDIAC_CELL_DEVELOPMENT		23	0.350978	1.01703	0.404612	0.765645	1	455	tags=35%, list=17%, signal=41%
GOCC_ENDOCYTIC_VESICLE_MEMBRANE	GOCC_ENDOCYTIC_VESICLE_MEMBRANE		42	0.295421	1.01669	0.427757	0.76552	1	788	tags=40%, list=29%, signal=56%
GOBP_REGULATION_OF_EPITHELIAL_TO_MESENCHYMAL_TRANSITION	GOBP_REGULATION_OF_EPITHELIAL_TO_MESENCHYMAL_TRANSITION		17	0.397747	1.01624	0.443775	0.765739	1	713	tags=41%, list=26%, signal=55%
GOBP_MYELOID_LEUKOCYTE_DIFFERENTIATION	GOBP_MYELOID_LEUKOCYTE_DIFFERENTIATION		36	0.289655	1.01614	0.40856	0.764918	1	419	tags=19%, list=15%, signal=23%
GOBP_REGULATION_OF_HORMONE_LEVELS	GOBP_REGULATION_OF_HORMONE_LEVELS		95	0.252091	1.01563	0.426439	0.765211	1	519	tags=21%, list=19%, signal=25%
GOBP_TRANSCRIPTION_INITIATION_FROM_RNA_POLYMERASE_II_PROMOTER	GOBP_TRANSCRIPTION_INITIATION_FROM_RNA_POLYMERASE_II_PROMOTER		53	0.27931	1.01534	0.416826	0.764945	1	294	tags=17%, list=11%, signal=19%
GOBP_DEVELOPMENTAL_GROWTH	GOBP_DEVELOPMENTAL_GROWTH		148	0.233083	1.01398	0.425	0.767859	1	521	tags=23%, list=19%, signal=27%
GOBP_NEUTROPHIL_CHEMOTAXIS	GOBP_NEUTROPHIL_CHEMOTAXIS		15	0.405492	1.01296	0.439175	0.769817	1	732	tags=73%, list=27%, signal=100%
GOBP_REPRODUCTION	GOBP_REPRODUCTION		259	0.226189	1.01208	0.401656	0.771165	1	455	tags=19%, list=17%, signal=20%
GOMF_TRANSITION_METAL_ION_BINDING	GOMF_TRANSITION_METAL_ION_BINDING		207	0.229456	1.0116	0.385827	0.771387	1	395	tags=16%, list=15%, signal=18%
GOBP_CHROMOSOME_SEPARATION	GOBP_CHROMOSOME_SEPARATION		21	0.361681	1.01147	0.417293	0.770691	1	510	tags=33%, list=19%, signal=41%
GOCC_RNA_POLYMERASE_II_TRANSCRIPTION_REGULATOR_COMPLEX	GOCC_RNA_POLYMERASE_II_TRANSCRIPTION_REGULATOR_COMPLEX		49	0.251492	1.01141	0.420118	0.769741	1	144	tags=8%, list=5%, signal=8%
GOCC_RECYCLING_ENDOSOME	GOCC_RECYCLING_ENDOSOME		43	0.260377	1.01139	0.432377	0.768689	1	492	tags=26%, list=18%, signal=31%
GOBP_CELL_ACTIVATION	GOBP_CELL_ACTIVATION		266	0.238306	1.01129	0.42126	0.76789	1	491	tags=20%, list=18%, signal=22%
GOBP_GAMETE_GENERATION	GOBP_GAMETE_GENERATION		117	0.256463	1.01081	0.430894	0.768182	1	669	tags=32%, list=25%, signal=40%
GOMF_GTPASE_ACTIVITY	GOMF_GTPASE_ACTIVITY		64	0.278104	1.00955	0.423077	0.770909	1	349	tags=20%, list=13%, signal=23%
GOBP_ESTABLISHMENT_OF_PROTEIN_LOCALIZATION_TO_VACUOLE	GOBP_ESTABLISHMENT_OF_PROTEIN_LOCALIZATION_TO_VACUOLE		15	0.386071	1.00919	0.467327	0.770997	1	454	tags=40%, list=17%, signal=48%
GOBP_IMMUNE_EFFECTOR_PROCESS	GOBP_IMMUNE_EFFECTOR_PROCESS		206	0.245697	1.00908	0.434951	0.770267	1	509	tags=21%, list=19%, signal=24%
GOBP_POSITIVE_REGULATION_OF_RESPONSE_TO_BIOTIC_STIMULUS	GOBP_POSITIVE_REGULATION_OF_RESPONSE_TO_BIOTIC_STIMULUS		44	0.265367	1.00883	0.431138	0.769792	1	310	tags=14%, list=11%, signal=15%
GOCC_SYNAPTIC_VESICLE_MEMBRANE	GOCC_SYNAPTIC_VESICLE_MEMBRANE		16	0.368986	1.00806	0.430279	0.771003	1	84	tags=13%, list=3%, signal=13%
GOBP_DORSAL_VENTRAL_PATTERN_FORMATION	GOBP_DORSAL_VENTRAL_PATTERN_FORMATION		17	0.333665	1.00729	0.437137	0.772117	1	411	tags=24%, list=15%, signal=28%
GOBP_SOMATIC_STEM_CELL_POPULATION_MAINTENANCE	GOBP_SOMATIC_STEM_CELL_POPULATION_MAINTENANCE		18	0.37737	1.00697	0.421268	0.772046	1	420	tags=22%, list=15%, signal=26%
GOBP_CARDIAC_VENTRICLE_DEVELOPMENT	GOBP_CARDIAC_VENTRICLE_DEVELOPMENT		32	0.314926	1.00669	0.466667	0.77179	1	529	tags=25%, list=19%, signal=31%
GOCC_ACTIN_BASED_CELL_PROJECTION	GOCC_ACTIN_BASED_CELL_PROJECTION		45	0.299426	1.00612	0.451346	0.772416	1	541	tags=24%, list=20%, signal=30%
GOBP_REGULATION_OF_LYMPHOCYTE_ACTIVATION	GOBP_REGULATION_OF_LYMPHOCYTE_ACTIVATION		75	0.276098	1.00589	0.449898	0.772031	1	116	tags=9%, list=4%, signal=9%
GOBP_MALE_GAMETE_GENERATION	GOBP_MALE_GAMETE_GENERATION		90	0.260028	1.00543	0.445783	0.772288	1	669	tags=32%, list=25%, signal=41%
GOMF_KINASE_BINDING	GOMF_KINASE_BINDING		183	0.218603	1.00427	0.448276	0.774506	1	502	tags=23%, list=18%, signal=27%
GOBP_POSITIVE_REGULATION_OF_ORGAN_GROWTH	GOBP_POSITIVE_REGULATION_OF_ORGAN_GROWTH		15	0.389935	1.00331	0.460317	0.776182	1	248	tags=27%, list=9%, signal=29%
GOBP_POSITIVE_REGULATION_OF_HEART_GROWTH	GOBP_POSITIVE_REGULATION_OF_HEART_GROWTH		15	0.389935	1.00331	0.460317	0.775098	1	248	tags=27%, list=9%, signal=29%
GOCC_NEURON_PROJECTION_CYTOPLASM	GOCC_NEURON_PROJECTION_CYTOPLASM		23	0.317772	1.00218	0.431866	0.777306	1	442	tags=26%, list=16%, signal=31%
GOBP_NEURAL_NUCLEUS_DEVELOPMENT	GOBP_NEURAL_NUCLEUS_DEVELOPMENT		15	0.382706	1.00148	0.463654	0.778263	1	268	tags=27%, list=10%, signal=29%
GOBP_RECOMBINATIONAL_REPAIR	GOBP_RECOMBINATIONAL_REPAIR		20	0.345646	1.00113	0.452569	0.7782	1	878	tags=50%, list=32%, signal=73%
GOCC_TRANS_GOLGI_NETWORK_MEMBRANE	GOCC_TRANS_GOLGI_NETWORK_MEMBRANE		16	0.339478	1.00098	0.48062	0.777551	1	517	tags=31%, list=19%, signal=38%
GOBP_MITOTIC_DNA_INTEGRITY_CHECKPOINT	GOBP_MITOTIC_DNA_INTEGRITY_CHECKPOINT		15	0.377148	1.00057	0.471429	0.777647	1	512	tags=47%, list=19%, signal=57%
GOBP_MUSCLE_ADAPTATION	GOBP_MUSCLE_ADAPTATION		29	0.307861	1.00036	0.437624	0.777182	1	571	tags=38%, list=21%, signal=47%
GOBP_POSITIVE_REGULATION_OF_PHOSPHATIDYLINOSITOL_3_KINASE_SIGNALING	GOBP_POSITIVE_REGULATION_OF_PHOSPHATIDYLINOSITOL_3_KINASE_SIGNALING		26	0.330919	0.998483	0.459245	0.781623	1	221	tags=27%, list=8%, signal=29%
GOBP_POSITIVE_REGULATION_OF_CELL_DEATH	GOBP_POSITIVE_REGULATION_OF_CELL_DEATH		143	0.229846	0.997625	0.432866	0.783065	1	398	tags=14%, list=15%, signal=16%
GOBP_CELL_PROJECTION_ORGANIZATION	GOBP_CELL_PROJECTION_ORGANIZATION		323	0.204196	0.997134	0.455696	0.78329	1	465	tags=17%, list=17%, signal=18%
GOBP_MYELOID_LEUKOCYTE_ACTIVATION	GOBP_MYELOID_LEUKOCYTE_ACTIVATION		121	0.250232	0.996805	0.467327	0.783173	1	762	tags=31%, list=28%, signal=42%
GOCC_TERTIARY_GRANULE_MEMBRANE	GOCC_TERTIARY_GRANULE_MEMBRANE		15	0.371102	0.996158	0.487524	0.784021	1	738	tags=40%, list=27%, signal=55%
GOBP_SEXUAL_REPRODUCTION	GOBP_SEXUAL_REPRODUCTION		147	0.233581	0.996124	0.464143	0.783043	1	449	tags=20%, list=16%, signal=22%
GOBP_EMBRYONIC_MORPHOGENESIS	GOBP_EMBRYONIC_MORPHOGENESIS		130	0.260211	0.995544	0.446894	0.78374	1	529	tags=22%, list=19%, signal=25%
GOBP_CELL_CYCLE_ARREST	GOBP_CELL_CYCLE_ARREST		46	0.30205	0.995318	0.448276	0.783316	1	513	tags=30%, list=19%, signal=37%
GOBP_MULTI_ORGANISM_PROCESS	GOBP_MULTI_ORGANISM_PROCESS		191	0.225787	0.993461	0.450505	0.78758	1	669	tags=29%, list=25%, signal=35%
GOMF_CYTOKINE_RECEPTOR_BINDING	GOMF_CYTOKINE_RECEPTOR_BINDING		39	0.311929	0.993081	0.45809	0.787581	1	288	tags=18%, list=11%, signal=20%
GOBP_DEFENSE_RESPONSE_TO_OTHER_ORGANISM	GOBP_DEFENSE_RESPONSE_TO_OTHER_ORGANISM		167	0.257346	0.991758	0.464	0.790242	1	414	tags=16%, list=15%, signal=18%
GOBP_NEURAL_TUBE_FORMATION	GOBP_NEURAL_TUBE_FORMATION		19	0.346508	0.99166	0.478346	0.789448	1	529	tags=21%, list=19%, signal=26%
GOBP_POSITIVE_REGULATION_OF_LEUKOCYTE_MIGRATION	GOBP_POSITIVE_REGULATION_OF_LEUKOCYTE_MIGRATION		17	0.371271	0.99157	0.485714	0.788604	1	411	tags=29%, list=15%, signal=34%
GOBP_REGULATION_OF_SMALL_MOLECULE_METABOLIC_PROCESS	GOBP_REGULATION_OF_SMALL_MOLECULE_METABOLIC_PROCESS		101	0.254083	0.99102	0.466801	0.78912	1	437	tags=22%, list=16%, signal=25%
GOBP_VASCULATURE_DEVELOPMENT	GOBP_VASCULATURE_DEVELOPMENT		175	0.240434	0.989623	0.465753	0.792097	1	493	tags=22%, list=18%, signal=25%
GOMF_G_PROTEIN_COUPLED_RECEPTOR_BINDING	GOMF_G_PROTEIN_COUPLED_RECEPTOR_BINDING		47	0.304474	0.988993	0.486	0.792849	1	624	tags=28%, list=23%, signal=35%
GOBP_TISSUE_HOMEOSTASIS	GOBP_TISSUE_HOMEOSTASIS		54	0.279	0.988932	0.462777	0.791937	1	421	tags=20%, list=15%, signal=24%
GOBP_POSITIVE_REGULATION_OF_SMALL_MOLECULE_METABOLIC_PROCESS	GOBP_POSITIVE_REGULATION_OF_SMALL_MOLECULE_METABOLIC_PROCESS		41	0.307352	0.988663	0.465649	0.79164	1	493	tags=29%, list=18%, signal=35%
GOMF_LIGAND_GATED_CATION_CHANNEL_ACTIVITY	GOMF_LIGAND_GATED_CATION_CHANNEL_ACTIVITY		27	0.319629	0.988374	0.477444	0.791391	1	985	tags=59%, list=36%, signal=92%
GOBP_RESPONSE_TO_FATTY_ACID	GOBP_RESPONSE_TO_FATTY_ACID		15	0.395064	0.986558	0.468951	0.795746	1	665	tags=53%, list=24%, signal=70%
GOCC_PLASMA_MEMBRANE_BOUNDED_CELL_PROJECTION_CYTOPLASM	GOCC_PLASMA_MEMBRANE_BOUNDED_CELL_PROJECTION_CYTOPLASM		41	0.283055	0.986387	0.459402	0.795144	1	442	tags=20%, list=16%, signal=23%
GOBP_TELOMERE_MAINTENANCE_VIA_TELOMERE_LENGTHENING	GOBP_TELOMERE_MAINTENANCE_VIA_TELOMERE_LENGTHENING		16	0.353127	0.984523	0.46516	0.799624	1	623	tags=38%, list=23%, signal=48%
GOBP_REGULATION_OF_PROTEIN_MODIFICATION_BY_SMALL_PROTEIN_CONJUGATION_OR_REMOVAL	GOBP_REGULATION_OF_PROTEIN_MODIFICATION_BY_SMALL_PROTEIN_CONJUGATION_OR_REMOVAL		56	0.25685	0.984509	0.483559	0.798598	1	103	tags=9%, list=4%, signal=9%
GOBP_POSITIVE_REGULATION_OF_REACTIVE_OXYGEN_SPECIES_METABOLIC_PROCESS	GOBP_POSITIVE_REGULATION_OF_REACTIVE_OXYGEN_SPECIES_METABOLIC_PROCESS		25	0.335739	0.983719	0.446768	0.799764	1	411	tags=24%, list=15%, signal=28%
GOBP_EPITHELIAL_CELL_PROLIFERATION	GOBP_EPITHELIAL_CELL_PROLIFERATION		88	0.259401	0.983256	0.488327	0.800019	1	326	tags=15%, list=12%, signal=16%
GOBP_MUSCLE_FIBER_DEVELOPMENT	GOBP_MUSCLE_FIBER_DEVELOPMENT		15	0.399306	0.983148	0.481188	0.799283	1	262	tags=27%, list=10%, signal=29%
GOMF_CYSTEINE_TYPE_PEPTIDASE_ACTIVITY	GOMF_CYSTEINE_TYPE_PEPTIDASE_ACTIVITY		36	0.317449	0.983146	0.462656	0.798221	1	273	tags=17%, list=10%, signal=18%
GOBP_POSITIVE_REGULATION_OF_ORGANELLE_ORGANIZATION	GOBP_POSITIVE_REGULATION_OF_ORGANELLE_ORGANIZATION		133	0.236924	0.982216	0.484849	0.799869	1	543	tags=23%, list=20%, signal=28%
GOBP_SULFUR_COMPOUND_BIOSYNTHETIC_PROCESS	GOBP_SULFUR_COMPOUND_BIOSYNTHETIC_PROCESS		42	0.310828	0.982058	0.482474	0.79925	1	203	tags=14%, list=7%, signal=15%
GOBP_DIGESTIVE_TRACT_MORPHOGENESIS	GOBP_DIGESTIVE_TRACT_MORPHOGENESIS		15	0.391563	0.982049	0.445361	0.798213	1	13	tags=7%, list=0%, signal=7%
GOCC_PLASMA_MEMBRANE_PROTEIN_COMPLEX	GOCC_PLASMA_MEMBRANE_PROTEIN_COMPLEX		149	0.224282	0.981763	0.506823	0.798002	1	414	tags=18%, list=15%, signal=20%
GOBP_POSITIVE_REGULATION_OF_ENDOCYTOSIS	GOBP_POSITIVE_REGULATION_OF_ENDOCYTOSIS		23	0.313134	0.9816	0.489837	0.797434	1	221	tags=13%, list=8%, signal=14%
GOBP_DNA_REPAIR	GOBP_DNA_REPAIR		98	0.23172	0.981289	0.467327	0.797259	1	631	tags=26%, list=23%, signal=32%
GOBP_SMOOTHENED_SIGNALING_PATHWAY	GOBP_SMOOTHENED_SIGNALING_PATHWAY		27	0.301969	0.981081	0.491936	0.796786	1	294	tags=19%, list=11%, signal=21%
GOBP_DIGESTIVE_SYSTEM_PROCESS	GOBP_DIGESTIVE_SYSTEM_PROCESS		22	0.334286	0.981056	0.480469	0.795816	1	290	tags=18%, list=11%, signal=20%
GOBP_CAMERA_TYPE_EYE_DEVELOPMENT	GOBP_CAMERA_TYPE_EYE_DEVELOPMENT		68	0.26729	0.981027	0.486328	0.794851	1	311	tags=16%, list=11%, signal=18%
GOBP_EPIDERMAL_GROWTH_FACTOR_RECEPTOR_SIGNALING_PATHWAY	GOBP_EPIDERMAL_GROWTH_FACTOR_RECEPTOR_SIGNALING_PATHWAY		39	0.285448	0.98035	0.486381	0.795877	1	221	tags=15%, list=8%, signal=17%
GOBP_REGULATION_OF_CYTOSKELETON_ORGANIZATION	GOBP_REGULATION_OF_CYTOSKELETON_ORGANIZATION		110	0.252943	0.979525	0.490835	0.797241	1	421	tags=20%, list=15%, signal=23%
GOBP_TAXIS	GOBP_TAXIS		126	0.233926	0.97951	0.497984	0.796228	1	411	tags=16%, list=15%, signal=18%
GOBP_OUTFLOW_TRACT_MORPHOGENESIS	GOBP_OUTFLOW_TRACT_MORPHOGENESIS		23	0.328969	0.979479	0.483748	0.795253	1	248	tags=13%, list=9%, signal=14%
GOBP_REGULATION_OF_ORGAN_GROWTH	GOBP_REGULATION_OF_ORGAN_GROWTH		28	0.311837	0.979151	0.471888	0.795181	1	248	tags=18%, list=9%, signal=19%
GOBP_REGULATION_OF_ENDOCYTOSIS	GOBP_REGULATION_OF_ENDOCYTOSIS		46	0.266586	0.978738	0.483471	0.795366	1	606	tags=26%, list=22%, signal=33%
GOBP_EXTRINSIC_APOPTOTIC_SIGNALING_PATHWAY	GOBP_EXTRINSIC_APOPTOTIC_SIGNALING_PATHWAY		58	0.263995	0.978587	0.502041	0.794779	1	421	tags=21%, list=15%, signal=24%
GOBP_RETROGRADE_TRANSPORT_ENDOSOME_TO_GOLGI	GOBP_RETROGRADE_TRANSPORT_ENDOSOME_TO_GOLGI		19	0.323581	0.978561	0.466135	0.793818	1	62	tags=11%, list=2%, signal=11%
GOBP_POSITIVE_REGULATION_OF_CELL_MATRIX_ADHESION	GOBP_POSITIVE_REGULATION_OF_CELL_MATRIX_ADHESION		15	0.40249	0.976876	0.494071	0.797557	1	114	tags=13%, list=4%, signal=14%
GOBP_NEGATIVE_REGULATION_OF_IMMUNE_EFFECTOR_PROCESS	GOBP_NEGATIVE_REGULATION_OF_IMMUNE_EFFECTOR_PROCESS		23	0.297401	0.976634	0.482283	0.797217	1	93	tags=9%, list=3%, signal=9%
GOCC_RECYCLING_ENDOSOME_MEMBRANE	GOCC_RECYCLING_ENDOSOME_MEMBRANE		23	0.297763	0.976541	0.488753	0.796465	1	606	tags=35%, list=22%, signal=44%
GOBP_REGULATION_OF_PROTEIN_MODIFICATION_PROCESS	GOBP_REGULATION_OF_PROTEIN_MODIFICATION_PROCESS		329	0.204183	0.976486	0.514735	0.795583	1	543	tags=22%, list=20%, signal=24%
GOBP_RESPONSE_TO_EXTRACELLULAR_STIMULUS	GOBP_RESPONSE_TO_EXTRACELLULAR_STIMULUS		87	0.253292	0.97639	0.504892	0.794794	1	466	tags=24%, list=17%, signal=28%
GOBP_INTRACELLULAR_PROTEIN_TRANSPORT	GOBP_INTRACELLULAR_PROTEIN_TRANSPORT		253	0.185912	0.975768	0.477733	0.795497	1	465	tags=18%, list=17%, signal=20%
GOBP_REGULATION_OF_MUSCLE_CONTRACTION	GOBP_REGULATION_OF_MUSCLE_CONTRACTION		35	0.306405	0.975752	0.477551	0.794506	1	455	tags=23%, list=17%, signal=27%
GOBP_HOMEOSTATIC_PROCESS	GOBP_HOMEOSTATIC_PROCESS		353	0.214979	0.975735	0.539554	0.79354	1	518	tags=21%, list=19%, signal=23%
GOBP_POST_GOLGI_VESICLE_MEDIATED_TRANSPORT	GOBP_POST_GOLGI_VESICLE_MEDIATED_TRANSPORT		24	0.296915	0.9751	0.47479	0.794384	1	492	tags=29%, list=18%, signal=35%
GOBP_CELL_MATRIX_ADHESION	GOBP_CELL_MATRIX_ADHESION		59	0.277781	0.975031	0.475992	0.793539	1	365	tags=19%, list=13%, signal=21%
GOBP_NEURAL_CREST_CELL_DIFFERENTIATION	GOBP_NEURAL_CREST_CELL_DIFFERENTIATION		27	0.323621	0.975016	0.48583	0.792543	1	292	tags=19%, list=11%, signal=21%
GOCC_CYTOSOLIC_RIBOSOME	GOCC_CYTOSOLIC_RIBOSOME		33	0.267433	0.97445	0.454545	0.793187	1	1104	tags=67%, list=41%, signal=111%
GOBP_REGULATION_OF_IMMUNE_RESPONSE	GOBP_REGULATION_OF_IMMUNE_RESPONSE		145	0.235704	0.973973	0.494048	0.793509	1	350	tags=14%, list=13%, signal=16%
GOBP_DNA_TEMPLATED_TRANSCRIPTION_INITIATION	GOBP_DNA_TEMPLATED_TRANSCRIPTION_INITIATION		63	0.254908	0.972954	0.475096	0.795438	1	294	tags=16%, list=11%, signal=17%
GOMF_CELL_ADHESION_MOLECULE_BINDING	GOMF_CELL_ADHESION_MOLECULE_BINDING		132	0.246152	0.971257	0.525386	0.799317	1	375	tags=17%, list=14%, signal=19%
GOCC_AXON_CYTOPLASM	GOCC_AXON_CYTOPLASM		17	0.329483	0.969207	0.507431	0.80415	1	442	tags=29%, list=16%, signal=35%
GOBP_RESPONSE_TO_TEMPERATURE_STIMULUS	GOBP_RESPONSE_TO_TEMPERATURE_STIMULUS		50	0.273026	0.969186	0.504708	0.803185	1	622	tags=40%, list=23%, signal=51%
GOMF_SMAD_BINDING	GOMF_SMAD_BINDING		25	0.35064	0.968404	0.504854	0.804382	1	644	tags=32%, list=24%, signal=42%
GOBP_REGULATION_OF_PROTEIN_KINASE_ACTIVITY	GOBP_REGULATION_OF_PROTEIN_KINASE_ACTIVITY		175	0.218515	0.967903	0.519507	0.804765	1	478	tags=20%, list=18%, signal=23%
GOBP_CELL_MORPHOGENESIS	GOBP_CELL_MORPHOGENESIS		242	0.210027	0.96732	0.540206	0.805307	1	350	tags=15%, list=13%, signal=16%
GOBP_LEUKOCYTE_MEDIATED_IMMUNITY	GOBP_LEUKOCYTE_MEDIATED_IMMUNITY		131	0.242196	0.967116	0.515686	0.804873	1	613	tags=24%, list=23%, signal=30%
GOBP_DEFENSE_RESPONSE_TO_VIRUS	GOBP_DEFENSE_RESPONSE_TO_VIRUS		43	0.327176	0.967096	0.501969	0.803917	1	534	tags=28%, list=20%, signal=34%
GOBP_GOLGI_VESICLE_TRANSPORT	GOBP_GOLGI_VESICLE_TRANSPORT		73	0.222457	0.966678	0.503043	0.804095	1	492	tags=19%, list=18%, signal=23%
GOBP_ACTIN_FILAMENT_ORGANIZATION	GOBP_ACTIN_FILAMENT_ORGANIZATION		94	0.247566	0.9653	0.515528	0.806955	1	368	tags=17%, list=14%, signal=19%
GOBP_MEMORY	GOBP_MEMORY		24	0.320973	0.964879	0.493069	0.807093	1	494	tags=38%, list=18%, signal=45%
GOBP_ODONTOGENESIS	GOBP_ODONTOGENESIS		29	0.305367	0.964472	0.503254	0.807182	1	56	tags=7%, list=2%, signal=7%
GOBP_RESPONSE_TO_CYTOKINE	GOBP_RESPONSE_TO_CYTOKINE		217	0.236291	0.964117	0.523077	0.80712	1	420	tags=19%, list=15%, signal=21%
GOBP_CYTOKINE_PRODUCTION	GOBP_CYTOKINE_PRODUCTION		127	0.236918	0.963339	0.511905	0.808402	1	560	tags=23%, list=21%, signal=27%
GOBP_DIGESTION	GOBP_DIGESTION		23	0.325665	0.963128	0.506903	0.80799	1	290	tags=17%, list=11%, signal=19%
GOBP_ENDODERM_DEVELOPMENT	GOBP_ENDODERM_DEVELOPMENT		19	0.354826	0.963067	0.532909	0.807143	1	463	tags=32%, list=17%, signal=38%
GOMF_STRUCTURAL_CONSTITUENT_OF_CYTOSKELETON	GOMF_STRUCTURAL_CONSTITUENT_OF_CYTOSKELETON		25	0.298311	0.962599	0.485537	0.807513	1	687	tags=40%, list=25%, signal=53%
GOBP_CELL_CELL_ADHESION	GOBP_CELL_CELL_ADHESION		172	0.227754	0.962334	0.553106	0.807245	1	330	tags=14%, list=12%, signal=15%
GOBP_REGULATION_OF_EPITHELIAL_CELL_DIFFERENTIATION	GOBP_REGULATION_OF_EPITHELIAL_CELL_DIFFERENTIATION		25	0.308523	0.962275	0.514894	0.80639	1	521	tags=28%, list=19%, signal=34%
GOBP_DNA_REPLICATION	GOBP_DNA_REPLICATION		55	0.256709	0.962253	0.497018	0.805441	1	713	tags=33%, list=26%, signal=43%
GOBP_POSITIVE_REGULATION_OF_CELL_CYCLE_PROCESS	GOBP_POSITIVE_REGULATION_OF_CELL_CYCLE_PROCESS		62	0.282461	0.962237	0.491124	0.804492	1	512	tags=31%, list=19%, signal=37%
GOBP_PLACENTA_DEVELOPMENT	GOBP_PLACENTA_DEVELOPMENT		25	0.266826	0.961339	0.492843	0.806025	1	209	tags=16%, list=8%, signal=17%
GOBP_POSITIVE_REGULATION_OF_NERVOUS_SYSTEM_DEVELOPMENT	GOBP_POSITIVE_REGULATION_OF_NERVOUS_SYSTEM_DEVELOPMENT		64	0.263172	0.960968	0.528	0.806098	1	267	tags=14%, list=10%, signal=15%
GOBP_SECRETION	GOBP_SECRETION		286	0.207575	0.960459	0.573561	0.806502	1	515	tags=20%, list=19%, signal=22%
GOBP_SOMATIC_DIVERSIFICATION_OF_IMMUNE_RECEPTORS	GOBP_SOMATIC_DIVERSIFICATION_OF_IMMUNE_RECEPTORS		16	0.324226	0.960281	0.489496	0.805965	1	252	tags=19%, list=9%, signal=21%
GOBP_RESPONSE_TO_INORGANIC_SUBSTANCE	GOBP_RESPONSE_TO_INORGANIC_SUBSTANCE		123	0.22243	0.960015	0.544355	0.805739	1	519	tags=21%, list=19%, signal=25%
GOBP_EPITHELIUM_DEVELOPMENT	GOBP_EPITHELIUM_DEVELOPMENT		233	0.219553	0.957246	0.588983	0.812398	1	271	tags=12%, list=10%, signal=13%
GOBP_CELLULAR_MACROMOLECULE_LOCALIZATION	GOBP_CELLULAR_MACROMOLECULE_LOCALIZATION		405	0.175666	0.957218	0.562372	0.811466	1	502	tags=19%, list=18%, signal=20%
GOBP_DEVELOPMENTAL_GROWTH_INVOLVED_IN_MORPHOGENESIS	GOBP_DEVELOPMENTAL_GROWTH_INVOLVED_IN_MORPHOGENESIS		63	0.246715	0.956789	0.525896	0.811691	1	240	tags=10%, list=9%, signal=10%
GOBP_REGULATION_OF_PROTEIN_CATABOLIC_PROCESS	GOBP_REGULATION_OF_PROTEIN_CATABOLIC_PROCESS		91	0.228075	0.955702	0.515213	0.813846	1	183	tags=10%, list=7%, signal=10%
GOBP_POSITIVE_REGULATION_OF_REPRODUCTIVE_PROCESS	GOBP_POSITIVE_REGULATION_OF_REPRODUCTIVE_PROCESS		17	0.3547	0.955697	0.514793	0.812857	1	219	tags=12%, list=8%, signal=13%
GOBP_REGULATION_OF_PEPTIDE_SECRETION	GOBP_REGULATION_OF_PEPTIDE_SECRETION		59	0.251471	0.955442	0.556008	0.812611	1	115	tags=10%, list=4%, signal=10%
GOBP_REGULATION_OF_CHEMOTAXIS	GOBP_REGULATION_OF_CHEMOTAXIS		37	0.300509	0.955399	0.518072	0.811724	1	449	tags=24%, list=16%, signal=29%
GOBP_RESPONSE_TO_ETHANOL	GOBP_RESPONSE_TO_ETHANOL		31	0.291357	0.954697	0.518887	0.812704	1	414	tags=23%, list=15%, signal=26%
GOBP_ENDOTHELIAL_CELL_MIGRATION	GOBP_ENDOTHELIAL_CELL_MIGRATION		51	0.298838	0.95468	0.502058	0.811756	1	493	tags=33%, list=18%, signal=40%
GOBP_POSITIVE_REGULATION_OF_SMOOTH_MUSCLE_CELL_PROLIFERATION	GOBP_POSITIVE_REGULATION_OF_SMOOTH_MUSCLE_CELL_PROLIFERATION		22	0.349229	0.954147	0.517312	0.812239	1	411	tags=32%, list=15%, signal=37%
GOBP_TERPENOID_METABOLIC_PROCESS	GOBP_TERPENOID_METABOLIC_PROCESS		17	0.396436	0.951449	0.545106	0.818836	1	44	tags=12%, list=2%, signal=12%
GOBP_ORGANELLE_FISSION	GOBP_ORGANELLE_FISSION		84	0.241057	0.951287	0.512048	0.818266	1	742	tags=36%, list=27%, signal=48%
GOBP_KIDNEY_EPITHELIUM_DEVELOPMENT	GOBP_KIDNEY_EPITHELIUM_DEVELOPMENT		31	0.300251	0.950828	0.529412	0.818578	1	645	tags=32%, list=24%, signal=42%
GOBP_POSITIVE_REGULATION_OF_MUSCLE_CELL_DIFFERENTIATION	GOBP_POSITIVE_REGULATION_OF_MUSCLE_CELL_DIFFERENTIATION		16	0.329734	0.950564	0.528	0.818354	1	566	tags=38%, list=21%, signal=47%
GOBP_POSITIVE_REGULATION_OF_CHEMOTAXIS	GOBP_POSITIVE_REGULATION_OF_CHEMOTAXIS		23	0.355549	0.950419	0.548708	0.817772	1	411	tags=26%, list=15%, signal=30%
GOBP_NUCLEAR_CHROMOSOME_SEGREGATION	GOBP_NUCLEAR_CHROMOSOME_SEGREGATION		44	0.285892	0.950058	0.512048	0.817772	1	521	tags=25%, list=19%, signal=30%
GOBP_PLASMA_MEMBRANE_ORGANIZATION	GOBP_PLASMA_MEMBRANE_ORGANIZATION		22	0.320697	0.949906	0.517241	0.81726	1	703	tags=45%, list=26%, signal=61%
GOBP_ALPHA_AMINO_ACID_CATABOLIC_PROCESS	GOBP_ALPHA_AMINO_ACID_CATABOLIC_PROCESS		21	0.344032	0.949528	0.520792	0.817253	1	278	tags=24%, list=10%, signal=26%
GOBP_REGULATION_OF_CELLULAR_CARBOHYDRATE_METABOLIC_PROCESS	GOBP_REGULATION_OF_CELLULAR_CARBOHYDRATE_METABOLIC_PROCESS		39	0.30216	0.94873	0.527163	0.818559	1	415	tags=26%, list=15%, signal=30%
GOBP_EMBRYONIC_ORGAN_DEVELOPMENT	GOBP_EMBRYONIC_ORGAN_DEVELOPMENT		84	0.254514	0.948593	0.558233	0.817936	1	522	tags=23%, list=19%, signal=27%
GOCC_TRANSPORT_VESICLE	GOCC_TRANSPORT_VESICLE		78	0.235736	0.948365	0.529637	0.817571	1	604	tags=27%, list=22%, signal=34%
GOMF_GUANYL_NUCLEOTIDE_BINDING	GOMF_GUANYL_NUCLEOTIDE_BINDING		76	0.247771	0.947328	0.523346	0.819505	1	356	tags=20%, list=13%, signal=22%
GOBP_PROTEIN_TRANSPORT_ALONG_MICROTUBULE	GOBP_PROTEIN_TRANSPORT_ALONG_MICROTUBULE		16	0.330645	0.94696	0.529536	0.819453	1	442	tags=25%, list=16%, signal=30%
GOBP_PRIMARY_NEURAL_TUBE_FORMATION	GOBP_PRIMARY_NEURAL_TUBE_FORMATION		18	0.333768	0.946846	0.538767	0.818748	1	13	tags=6%, list=0%, signal=6%
GOMF_ZINC_ION_BINDING	GOMF_ZINC_ION_BINDING		168	0.224284	0.945816	0.583851	0.820674	1	361	tags=15%, list=13%, signal=16%
GOBP_POSITIVE_REGULATION_OF_CELL_CYCLE	GOBP_POSITIVE_REGULATION_OF_CELL_CYCLE		90	0.252076	0.945741	0.551724	0.819895	1	537	tags=28%, list=20%, signal=33%
GOBP_AXON_DEVELOPMENT	GOBP_AXON_DEVELOPMENT		126	0.215809	0.945576	0.590551	0.819347	1	364	tags=14%, list=13%, signal=16%
GOBP_NEGATIVE_REGULATION_OF_PROTEIN_METABOLIC_PROCESS	GOBP_NEGATIVE_REGULATION_OF_PROTEIN_METABOLIC_PROCESS		186	0.200644	0.945234	0.590264	0.819325	1	557	tags=24%, list=20%, signal=28%
GOBP_EMBRYO_DEVELOPMENT_ENDING_IN_BIRTH_OR_EGG_HATCHING	GOBP_EMBRYO_DEVELOPMENT_ENDING_IN_BIRTH_OR_EGG_HATCHING		119	0.232452	0.945142	0.552147	0.818616	1	719	tags=30%, list=26%, signal=39%
GOBP_CELLULAR_RESPONSE_TO_CORTICOSTEROID_STIMULUS	GOBP_CELLULAR_RESPONSE_TO_CORTICOSTEROID_STIMULUS		16	0.318185	0.943632	0.521561	0.821986	1	420	tags=25%, list=15%, signal=29%
GOBP_MAINTENANCE_OF_CELL_NUMBER	GOBP_MAINTENANCE_OF_CELL_NUMBER		41	0.280098	0.942937	0.537864	0.822922	1	598	tags=29%, list=22%, signal=37%
GOBP_PURINE_CONTAINING_COMPOUND_METABOLIC_PROCESS	GOBP_PURINE_CONTAINING_COMPOUND_METABOLIC_PROCESS		96	0.248892	0.942345	0.580897	0.823633	1	472	tags=23%, list=17%, signal=27%
GOCC_SECRETORY_VESICLE	GOCC_SECRETORY_VESICLE		186	0.213543	0.941934	0.562745	0.823749	1	509	tags=22%, list=19%, signal=25%
GOMF_STEROID_BINDING	GOMF_STEROID_BINDING		23	0.32532	0.941593	0.568862	0.823696	1	345	tags=22%, list=13%, signal=25%
GOCC_TRANSCRIPTION_REPRESSOR_COMPLEX	GOCC_TRANSCRIPTION_REPRESSOR_COMPLEX		20	0.319262	0.941439	0.531621	0.823212	1	3	tags=5%, list=0%, signal=5%
GOBP_REGULATION_OF_MUSCLE_ADAPTATION	GOBP_REGULATION_OF_MUSCLE_ADAPTATION		21	0.29977	0.940953	0.505092	0.823603	1	571	tags=33%, list=21%, signal=42%
GOBP_POSITIVE_REGULATION_OF_ESTABLISHMENT_OF_PROTEIN_LOCALIZATION	GOBP_POSITIVE_REGULATION_OF_ESTABLISHMENT_OF_PROTEIN_LOCALIZATION		77	0.236619	0.940441	0.565041	0.824043	1	539	tags=26%, list=20%, signal=31%
GOMF_PROTEIN_DOMAIN_SPECIFIC_BINDING	GOMF_PROTEIN_DOMAIN_SPECIFIC_BINDING		178	0.206829	0.939903	0.595661	0.824567	1	384	tags=16%, list=14%, signal=18%
GOBP_RESPONSE_TO_LIGHT_STIMULUS	GOBP_RESPONSE_TO_LIGHT_STIMULUS		61	0.233671	0.939629	0.580583	0.824291	1	294	tags=15%, list=11%, signal=16%
GOCC_INTERMEDIATE_FILAMENT_CYTOSKELETON	GOCC_INTERMEDIATE_FILAMENT_CYTOSKELETON		23	0.261849	0.937894	0.519588	0.828044	1	687	tags=30%, list=25%, signal=40%
GOMF_CATALYTIC_ACTIVITY_ACTING_ON_DNA	GOMF_CATALYTIC_ACTIVITY_ACTING_ON_DNA		38	0.28892	0.937576	0.546906	0.827932	1	336	tags=18%, list=12%, signal=21%
GOBP_CENTRAL_NERVOUS_SYSTEM_NEURON_DEVELOPMENT	GOBP_CENTRAL_NERVOUS_SYSTEM_NEURON_DEVELOPMENT		25	0.310143	0.936704	0.543561	0.829325	1	289	tags=20%, list=11%, signal=22%
GOBP_CELLULAR_RESPONSE_TO_TOPOLOGICALLY_INCORRECT_PROTEIN	GOBP_CELLULAR_RESPONSE_TO_TOPOLOGICALLY_INCORRECT_PROTEIN		35	0.24712	0.93617	0.546875	0.82984	1	513	tags=20%, list=19%, signal=24%
GOBP_MORPHOGENESIS_OF_A_POLARIZED_EPITHELIUM	GOBP_MORPHOGENESIS_OF_A_POLARIZED_EPITHELIUM		28	0.292906	0.935798	0.545073	0.829813	1	387	tags=18%, list=14%, signal=21%
GOBP_OSSIFICATION	GOBP_OSSIFICATION		88	0.241755	0.934976	0.599206	0.831022	1	493	tags=20%, list=18%, signal=24%
GOBP_FATTY_ACID_BIOSYNTHETIC_PROCESS	GOBP_FATTY_ACID_BIOSYNTHETIC_PROCESS		21	0.338349	0.934091	0.579681	0.832492	1	489	tags=33%, list=18%, signal=40%
GOBP_POSITIVE_REGULATION_OF_CELL_POPULATION_PROLIFERATION	GOBP_POSITIVE_REGULATION_OF_CELL_POPULATION_PROLIFERATION		184	0.229421	0.933898	0.595092	0.832041	1	521	tags=21%, list=19%, signal=24%
GOMF_PROTEASE_BINDING	GOMF_PROTEASE_BINDING		22	0.305205	0.933677	0.536	0.831707	1	48	tags=9%, list=2%, signal=9%
GOBP_POSITIVE_REGULATION_OF_CELL_GROWTH	GOBP_POSITIVE_REGULATION_OF_CELL_GROWTH		38	0.266579	0.933037	0.576238	0.832519	1	411	tags=18%, list=15%, signal=21%
GOCC_TERTIARY_GRANULE	GOCC_TERTIARY_GRANULE		30	0.292111	0.932165	0.55642	0.833997	1	753	tags=40%, list=28%, signal=55%
GOBP_LAMELLIPODIUM_ORGANIZATION	GOBP_LAMELLIPODIUM_ORGANIZATION		22	0.329745	0.931534	0.568182	0.834781	1	172	tags=14%, list=6%, signal=14%
GOBP_INTERLEUKIN_12_PRODUCTION	GOBP_INTERLEUKIN_12_PRODUCTION		15	0.356218	0.930913	0.547842	0.835659	1	373	tags=13%, list=14%, signal=15%
GOBP_CELLULAR_COMPONENT_ASSEMBLY_INVOLVED_IN_MORPHOGENESIS	GOBP_CELLULAR_COMPONENT_ASSEMBLY_INVOLVED_IN_MORPHOGENESIS		30	0.295041	0.930573	0.553606	0.835636	1	764	tags=43%, list=28%, signal=60%
GOBP_POSITIVE_REGULATION_OF_LIPID_METABOLIC_PROCESS	GOBP_POSITIVE_REGULATION_OF_LIPID_METABOLIC_PROCESS		31	0.291561	0.929249	0.568034	0.838449	1	144	tags=13%, list=5%, signal=13%
GOMF_PROTEIN_N_TERMINUS_BINDING	GOMF_PROTEIN_N_TERMINUS_BINDING		21	0.297877	0.929155	0.558763	0.837745	1	938	tags=38%, list=34%, signal=58%
GOBP_CELLULAR_RESPONSE_TO_MOLECULE_OF_BACTERIAL_ORIGIN	GOBP_CELLULAR_RESPONSE_TO_MOLECULE_OF_BACTERIAL_ORIGIN		30	0.264856	0.928873	0.572614	0.837487	1	385	tags=17%, list=14%, signal=19%
GOBP_REGULATION_OF_ENDOTHELIAL_CELL_MIGRATION	GOBP_REGULATION_OF_ENDOTHELIAL_CELL_MIGRATION		44	0.290252	0.928576	0.546939	0.837272	1	493	tags=32%, list=18%, signal=38%
GOBP_TISSUE_REMODELING	GOBP_TISSUE_REMODELING		39	0.288619	0.927768	0.577075	0.838525	1	272	tags=15%, list=10%, signal=17%
GOCC_TRANSCRIPTION_REGULATOR_COMPLEX	GOCC_TRANSCRIPTION_REGULATOR_COMPLEX		103	0.215257	0.927396	0.580952	0.838546	1	685	tags=26%, list=25%, signal=34%
GOBP_ESTABLISHMENT_OF_PROTEIN_LOCALIZATION	GOBP_ESTABLISHMENT_OF_PROTEIN_LOCALIZATION		384	0.171729	0.927356	0.621118	0.837679	1	502	tags=18%, list=18%, signal=19%
GOMF_CHROMATIN_DNA_BINDING	GOMF_CHROMATIN_DNA_BINDING		16	0.305963	0.92728	0.543933	0.836929	1	363	tags=25%, list=13%, signal=29%
GOBP_LIPID_STORAGE	GOBP_LIPID_STORAGE		21	0.290972	0.926427	0.553106	0.838193	1	389	tags=19%, list=14%, signal=22%
GOBP_HORMONE_TRANSPORT	GOBP_HORMONE_TRANSPORT		64	0.240033	0.926118	0.579918	0.838038	1	144	tags=9%, list=5%, signal=10%
GOBP_CELLULAR_RESPONSE_TO_HYDROGEN_PEROXIDE	GOBP_CELLULAR_RESPONSE_TO_HYDROGEN_PEROXIDE		18	0.320316	0.924654	0.560484	0.841016	1	93	tags=11%, list=3%, signal=11%
GOBP_POSITIVE_REGULATION_OF_LOCOMOTION	GOBP_POSITIVE_REGULATION_OF_LOCOMOTION		120	0.244905	0.924154	0.622951	0.841438	1	427	tags=20%, list=16%, signal=23%
GOBP_CARBOHYDRATE_DERIVATIVE_METABOLIC_PROCESS	GOBP_CARBOHYDRATE_DERIVATIVE_METABOLIC_PROCESS		220	0.210571	0.923603	0.706226	0.842025	1	536	tags=22%, list=20%, signal=25%
GOBP_REGULATION_OF_HYDROLASE_ACTIVITY	GOBP_REGULATION_OF_HYDROLASE_ACTIVITY		231	0.196313	0.923303	0.64657	0.841854	1	327	tags=14%, list=12%, signal=14%
GOCC_INTRINSIC_COMPONENT_OF_POSTSYNAPTIC_MEMBRANE	GOCC_INTRINSIC_COMPONENT_OF_POSTSYNAPTIC_MEMBRANE		29	0.287018	0.923157	0.592445	0.841256	1	0	tags=3%, list=0%, signal=3%
GOCC_CYTOSOLIC_SMALL_RIBOSOMAL_SUBUNIT	GOCC_CYTOSOLIC_SMALL_RIBOSOMAL_SUBUNIT		16	0.317218	0.922973	0.536885	0.840798	1	997	tags=63%, list=37%, signal=98%
GOBP_DNA_METABOLIC_PROCESS	GOBP_DNA_METABOLIC_PROCESS		159	0.207741	0.922643	0.631579	0.840696	1	566	tags=21%, list=21%, signal=25%
GOBP_ROOF_OF_MOUTH_DEVELOPMENT	GOBP_ROOF_OF_MOUTH_DEVELOPMENT		24	0.298424	0.922589	0.558468	0.839878	1	9	tags=4%, list=0%, signal=4%
GOBP_CYTOSKELETON_DEPENDENT_INTRACELLULAR_TRANSPORT	GOBP_CYTOSKELETON_DEPENDENT_INTRACELLULAR_TRANSPORT		41	0.238237	0.922102	0.560768	0.840301	1	452	tags=22%, list=17%, signal=26%
GOMF_CYTOKINE_BINDING	GOMF_CYTOKINE_BINDING		28	0.311057	0.921176	0.586837	0.841854	1	406	tags=21%, list=15%, signal=25%
GOCC_AZUROPHIL_GRANULE_LUMEN	GOCC_AZUROPHIL_GRANULE_LUMEN		17	0.331106	0.920943	0.582329	0.841483	1	613	tags=29%, list=23%, signal=38%
GOBP_VESICLE_BUDDING_FROM_MEMBRANE	GOBP_VESICLE_BUDDING_FROM_MEMBRANE		19	0.267148	0.920477	0.560547	0.841801	1	125	tags=11%, list=5%, signal=11%
GOCC_PRESYNAPSE	GOCC_PRESYNAPSE		119	0.227628	0.920274	0.631356	0.841404	1	497	tags=16%, list=18%, signal=19%
GOBP_LAMELLIPODIUM_ASSEMBLY	GOBP_LAMELLIPODIUM_ASSEMBLY		17	0.343563	0.920135	0.568862	0.840891	1	75	tags=12%, list=3%, signal=12%
GOBP_NON_CANONICAL_WNT_SIGNALING_PATHWAY	GOBP_NON_CANONICAL_WNT_SIGNALING_PATHWAY		27	0.324804	0.920032	0.600823	0.840208	1	76	tags=7%, list=3%, signal=8%
GOBP_POSITIVE_REGULATION_OF_PEPTIDYL_TYROSINE_PHOSPHORYLATION	GOBP_POSITIVE_REGULATION_OF_PEPTIDYL_TYROSINE_PHOSPHORYLATION		36	0.275406	0.919736	0.590818	0.840009	1	437	tags=25%, list=16%, signal=29%
GOCC_FILOPODIUM	GOCC_FILOPODIUM		31	0.276974	0.919298	0.59919	0.840203	1	541	tags=26%, list=20%, signal=32%
GOBP_REGULATION_OF_MAP_KINASE_ACTIVITY	GOBP_REGULATION_OF_MAP_KINASE_ACTIVITY		64	0.248185	0.919223	0.59501	0.839467	1	564	tags=23%, list=21%, signal=29%
GOBP_TISSUE_MIGRATION	GOBP_TISSUE_MIGRATION		78	0.265271	0.919088	0.608163	0.838873	1	493	tags=27%, list=18%, signal=32%
GOBP_CELL_AGING	GOBP_CELL_AGING		25	0.301248	0.918813	0.591085	0.838672	1	480	tags=28%, list=18%, signal=34%
GOBP_POSITIVE_REGULATION_OF_VASCULATURE_DEVELOPMENT	GOBP_POSITIVE_REGULATION_OF_VASCULATURE_DEVELOPMENT		30	0.289236	0.918142	0.607767	0.839499	1	455	tags=27%, list=17%, signal=32%
GOBP_EPITHELIAL_CELL_DIFFERENTIATION	GOBP_EPITHELIAL_CELL_DIFFERENTIATION		132	0.221166	0.917395	0.674089	0.840472	1	292	tags=14%, list=11%, signal=15%
GOBP_SMOOTH_MUSCLE_CONTRACTION	GOBP_SMOOTH_MUSCLE_CONTRACTION		26	0.302973	0.916888	0.588115	0.840862	1	468	tags=27%, list=17%, signal=32%
GOBP_REGULATION_OF_EXTRINSIC_APOPTOTIC_SIGNALING_PATHWAY	GOBP_REGULATION_OF_EXTRINSIC_APOPTOTIC_SIGNALING_PATHWAY		40	0.267218	0.916613	0.600402	0.840624	1	376	tags=20%, list=14%, signal=23%
GOBP_POSITIVE_REGULATION_OF_CELL_PROJECTION_ORGANIZATION	GOBP_POSITIVE_REGULATION_OF_CELL_PROJECTION_ORGANIZATION		86	0.22753	0.915747	0.604839	0.842002	1	337	tags=14%, list=12%, signal=15%
GOBP_REGULATION_OF_HORMONE_SECRETION	GOBP_REGULATION_OF_HORMONE_SECRETION		52	0.245507	0.915472	0.59798	0.841821	1	144	tags=10%, list=5%, signal=10%
GOBP_REGULATION_OF_REPRODUCTIVE_PROCESS	GOBP_REGULATION_OF_REPRODUCTIVE_PROCESS		33	0.298577	0.915188	0.596386	0.8416	1	219	tags=12%, list=8%, signal=13%
GOBP_SYNAPSE_ORGANIZATION	GOBP_SYNAPSE_ORGANIZATION		92	0.225539	0.91492	0.643443	0.841351	1	337	tags=13%, list=12%, signal=14%
GOBP_METHYLATION	GOBP_METHYLATION		48	0.25693	0.914154	0.616896	0.842429	1	165	tags=10%, list=6%, signal=11%
GOBP_PATTERN_SPECIFICATION_PROCESS	GOBP_PATTERN_SPECIFICATION_PROCESS		86	0.244303	0.913221	0.627255	0.843904	1	311	tags=16%, list=11%, signal=18%
GOMF_SERINE_HYDROLASE_ACTIVITY	GOMF_SERINE_HYDROLASE_ACTIVITY		22	0.286926	0.912859	0.628571	0.84389	1	163	tags=9%, list=6%, signal=10%
GOMF_CYSTEINE_TYPE_ENDOPEPTIDASE_ACTIVITY	GOMF_CYSTEINE_TYPE_ENDOPEPTIDASE_ACTIVITY		28	0.314109	0.912811	0.583505	0.843073	1	261	tags=14%, list=10%, signal=16%
GOBP_REGULATION_OF_TRANSPORTER_ACTIVITY	GOBP_REGULATION_OF_TRANSPORTER_ACTIVITY		61	0.221936	0.912019	0.615226	0.844351	1	445	tags=21%, list=16%, signal=25%
GOBP_ACTIN_POLYMERIZATION_OR_DEPOLYMERIZATION	GOBP_ACTIN_POLYMERIZATION_OR_DEPOLYMERIZATION		47	0.265278	0.911725	0.607214	0.844189	1	368	tags=19%, list=14%, signal=22%
GOBP_VENTRICULAR_CARDIAC_MUSCLE_TISSUE_DEVELOPMENT	GOBP_VENTRICULAR_CARDIAC_MUSCLE_TISSUE_DEVELOPMENT		16	0.341449	0.910795	0.583665	0.845693	1	9	tags=6%, list=0%, signal=6%
GOBP_ADAPTIVE_IMMUNE_RESPONSE_BASED_ON_SOMATIC_RECOMBINATION_OF_IMMUNE_RECEPTORS_BUILT_FROM_IMMUNOGLOBULIN_SUPERFAMILY_DOMAINS	GOBP_ADAPTIVE_IMMUNE_RESPONSE_BASED_ON_SOMATIC_RECOMBINATION_OF_IMMUNE_RECEPTORS_BUILT_FROM_IMMUNOGLOBULIN_SUPERFAMILY_DOMAINS		40	0.273586	0.91003	0.599182	0.846707	1	406	tags=18%, list=15%, signal=20%
GOMF_GROWTH_FACTOR_ACTIVITY	GOMF_GROWTH_FACTOR_ACTIVITY		24	0.321623	0.909133	0.600406	0.848081	1	147	tags=17%, list=5%, signal=17%
GOBP_CELLULAR_RESPONSE_TO_DNA_DAMAGE_STIMULUS	GOBP_CELLULAR_RESPONSE_TO_DNA_DAMAGE_STIMULUS		166	0.203473	0.90841	0.644487	0.848998	1	644	tags=25%, list=24%, signal=30%
GOBP_NEGATIVE_REGULATION_OF_IMMUNE_RESPONSE	GOBP_NEGATIVE_REGULATION_OF_IMMUNE_RESPONSE		24	0.271042	0.908267	0.593626	0.848444	1	93	tags=8%, list=3%, signal=9%
GOBP_POSITIVE_REGULATION_OF_PROTEIN_BINDING	GOBP_POSITIVE_REGULATION_OF_PROTEIN_BINDING		21	0.292215	0.906828	0.614754	0.851343	1	713	tags=38%, list=26%, signal=51%
GOBP_FORMATION_OF_PRIMARY_GERM_LAYER	GOBP_FORMATION_OF_PRIMARY_GERM_LAYER		24	0.305643	0.906658	0.622266	0.850875	1	330	tags=21%, list=12%, signal=23%
GOBP_REGULATION_OF_TELOMERE_MAINTENANCE	GOBP_REGULATION_OF_TELOMERE_MAINTENANCE		18	0.303747	0.905608	0.608108	0.852662	1	631	tags=33%, list=23%, signal=43%
GOBP_PROTEIN_ACYLATION	GOBP_PROTEIN_ACYLATION		43	0.227558	0.904802	0.593814	0.853824	1	501	tags=21%, list=18%, signal=25%
GOCC_TRANSPORT_VESICLE_MEMBRANE	GOCC_TRANSPORT_VESICLE_MEMBRANE		36	0.25835	0.904442	0.610465	0.853877	1	604	tags=28%, list=22%, signal=35%
GOBP_PROTEIN_PHOSPHORYLATION	GOBP_PROTEIN_PHOSPHORYLATION		349	0.194912	0.90416	0.684	0.853754	1	543	tags=21%, list=20%, signal=23%
GOBP_NEGATIVE_REGULATION_OF_TRANSCRIPTION_BY_RNA_POLYMERASE_II	GOBP_NEGATIVE_REGULATION_OF_TRANSCRIPTION_BY_RNA_POLYMERASE_II		199	0.213412	0.904142	0.62423	0.852885	1	689	tags=26%, list=25%, signal=32%
GOBP_RETINA_DEVELOPMENT_IN_CAMERA_TYPE_EYE	GOBP_RETINA_DEVELOPMENT_IN_CAMERA_TYPE_EYE		35	0.267842	0.903983	0.596838	0.852347	1	311	tags=17%, list=11%, signal=19%
GOBP_SMOOTH_MUSCLE_CELL_PROLIFERATION	GOBP_SMOOTH_MUSCLE_CELL_PROLIFERATION		31	0.301034	0.903862	0.620968	0.851746	1	603	tags=35%, list=22%, signal=45%
GOBP_HEPATICOBILIARY_SYSTEM_DEVELOPMENT	GOBP_HEPATICOBILIARY_SYSTEM_DEVELOPMENT		35	0.295414	0.903834	0.622047	0.85088	1	295	tags=17%, list=11%, signal=19%
GOBP_T_CELL_ACTIVATION	GOBP_T_CELL_ACTIVATION		92	0.248886	0.903526	0.644898	0.850753	1	420	tags=18%, list=15%, signal=21%
GOBP_SPROUTING_ANGIOGENESIS	GOBP_SPROUTING_ANGIOGENESIS		31	0.30222	0.902771	0.584677	0.851803	1	493	tags=32%, list=18%, signal=39%
GOMF_NUCLEAR_HORMONE_RECEPTOR_BINDING	GOMF_NUCLEAR_HORMONE_RECEPTOR_BINDING		32	0.250214	0.902079	0.591182	0.852643	1	609	tags=28%, list=22%, signal=36%
GOBP_ACTIVATION_OF_GTPASE_ACTIVITY	GOBP_ACTIVATION_OF_GTPASE_ACTIVITY		17	0.343052	0.901907	0.589899	0.852134	1	240	tags=24%, list=9%, signal=26%
GOCC_APICAL_JUNCTION_COMPLEX	GOCC_APICAL_JUNCTION_COMPLEX		34	0.271868	0.901836	0.596273	0.85136	1	364	tags=21%, list=13%, signal=23%
GOBP_AXO_DENDRITIC_TRANSPORT	GOBP_AXO_DENDRITIC_TRANSPORT		21	0.293462	0.901667	0.57173	0.850889	1	442	tags=24%, list=16%, signal=28%
GOBP_SOMITE_DEVELOPMENT	GOBP_SOMITE_DEVELOPMENT		17	0.355098	0.901629	0.599206	0.850069	1	584	tags=29%, list=21%, signal=37%
GOBP_POSITIVE_REGULATION_OF_ANION_TRANSPORT	GOBP_POSITIVE_REGULATION_OF_ANION_TRANSPORT		109	0.212065	0.900224	0.679245	0.852809	1	515	tags=25%, list=19%, signal=29%
GOBP_ENDOPLASMIC_RETICULUM_UNFOLDED_PROTEIN_RESPONSE	GOBP_ENDOPLASMIC_RETICULUM_UNFOLDED_PROTEIN_RESPONSE		29	0.25442	0.899513	0.60687	0.853664	1	513	tags=21%, list=19%, signal=25%
GOBP_INTRINSIC_APOPTOTIC_SIGNALING_PATHWAY_IN_RESPONSE_TO_DNA_DAMAGE	GOBP_INTRINSIC_APOPTOTIC_SIGNALING_PATHWAY_IN_RESPONSE_TO_DNA_DAMAGE		20	0.285597	0.898855	0.615385	0.854454	1	171	tags=10%, list=6%, signal=11%
GOBP_AMYLOID_BETA_METABOLIC_PROCESS	GOBP_AMYLOID_BETA_METABOLIC_PROCESS		17	0.323831	0.89873	0.612705	0.853838	1	594	tags=35%, list=22%, signal=45%
GOBP_REGULATION_OF_EPITHELIAL_CELL_MIGRATION	GOBP_REGULATION_OF_EPITHELIAL_CELL_MIGRATION		69	0.259266	0.898351	0.626016	0.853878	1	493	tags=26%, list=18%, signal=31%
GOBP_CELLULAR_RESPONSE_TO_ACID_CHEMICAL	GOBP_CELLULAR_RESPONSE_TO_ACID_CHEMICAL		19	0.312759	0.898299	0.617409	0.853105	1	414	tags=32%, list=15%, signal=37%
GOBP_REGULATION_OF_PROTEIN_POLYMERIZATION	GOBP_REGULATION_OF_PROTEIN_POLYMERIZATION		51	0.252803	0.898148	0.603622	0.852599	1	368	tags=18%, list=14%, signal=20%
GOBP_CARDIAC_VENTRICLE_MORPHOGENESIS	GOBP_CARDIAC_VENTRICLE_MORPHOGENESIS		18	0.309648	0.897806	0.621673	0.852565	1	463	tags=22%, list=17%, signal=27%
GOCC_MICROTUBULE_ORGANIZING_CENTER	GOCC_MICROTUBULE_ORGANIZING_CENTER		122	0.224417	0.897793	0.689162	0.851685	1	448	tags=18%, list=16%, signal=21%
GOCC_CELL_CORTEX	GOCC_CELL_CORTEX		66	0.217312	0.897666	0.655773	0.851116	1	313	tags=12%, list=11%, signal=13%
GOBP_MICROTUBULE_CYTOSKELETON_ORGANIZATION	GOBP_MICROTUBULE_CYTOSKELETON_ORGANIZATION		96	0.220766	0.897321	0.657841	0.851078	1	698	tags=32%, list=26%, signal=42%
GOBP_REGULATION_OF_REACTIVE_OXYGEN_SPECIES_METABOLIC_PROCESS	GOBP_REGULATION_OF_REACTIVE_OXYGEN_SPECIES_METABOLIC_PROCESS		33	0.280482	0.897262	0.595745	0.850335	1	411	tags=21%, list=15%, signal=25%
GOBP_POSITIVE_REGULATION_OF_NUCLEAR_DIVISION	GOBP_POSITIVE_REGULATION_OF_NUCLEAR_DIVISION		15	0.372318	0.896727	0.601643	0.850795	1	584	tags=40%, list=21%, signal=51%
GOBP_CALCIUM_ION_TRANSPORT_INTO_CYTOSOL	GOBP_CALCIUM_ION_TRANSPORT_INTO_CYTOSOL		30	0.248132	0.896422	0.647177	0.850665	1	842	tags=43%, list=31%, signal=62%
GOBP_REGULATION_OF_RESPONSE_TO_BIOTIC_STIMULUS	GOBP_REGULATION_OF_RESPONSE_TO_BIOTIC_STIMULUS		72	0.223469	0.896108	0.645749	0.850597	1	310	tags=13%, list=11%, signal=14%
GOBP_DNA_RECOMBINATION	GOBP_DNA_RECOMBINATION		52	0.24988	0.894811	0.615079	0.853024	1	631	tags=27%, list=23%, signal=34%
GOBP_THYMUS_DEVELOPMENT	GOBP_THYMUS_DEVELOPMENT		15	0.311067	0.894355	0.640385	0.85329	1	272	tags=13%, list=10%, signal=15%
GOBP_NCRNA_PROCESSING	GOBP_NCRNA_PROCESSING		52	0.210745	0.893556	0.594059	0.854447	1	453	tags=17%, list=17%, signal=20%
GOBP_VASCULOGENESIS	GOBP_VASCULOGENESIS		22	0.27164	0.893323	0.607767	0.854192	1	389	tags=18%, list=14%, signal=21%
GOBP_POSITIVE_REGULATION_OF_PROTEIN_LOCALIZATION_TO_NUCLEUS	GOBP_POSITIVE_REGULATION_OF_PROTEIN_LOCALIZATION_TO_NUCLEUS		19	0.285729	0.892331	0.619632	0.855796	1	697	tags=37%, list=26%, signal=49%
GOCC_TIGHT_JUNCTION	GOCC_TIGHT_JUNCTION		33	0.274058	0.891621	0.61157	0.856686	1	364	tags=21%, list=13%, signal=24%
GOBP_HEART_GROWTH	GOBP_HEART_GROWTH		29	0.278174	0.891452	0.615234	0.856182	1	455	tags=24%, list=17%, signal=29%
GOBP_AMYLOID_PRECURSOR_PROTEIN_CATABOLIC_PROCESS	GOBP_AMYLOID_PRECURSOR_PROTEIN_CATABOLIC_PROCESS		15	0.316118	0.891145	0.601179	0.85604	1	594	tags=33%, list=22%, signal=42%
GOBP_ENDOTHELIUM_DEVELOPMENT	GOBP_ENDOTHELIUM_DEVELOPMENT		34	0.263285	0.891044	0.628283	0.855408	1	368	tags=21%, list=14%, signal=24%
GOBP_TRANSPORT_ALONG_MICROTUBULE	GOBP_TRANSPORT_ALONG_MICROTUBULE		35	0.239455	0.890637	0.607143	0.855542	1	442	tags=23%, list=16%, signal=27%
GOBP_INTERFERON_GAMMA_MEDIATED_SIGNALING_PATHWAY	GOBP_INTERFERON_GAMMA_MEDIATED_SIGNALING_PATHWAY		22	0.353818	0.889328	0.581132	0.857892	1	604	tags=36%, list=22%, signal=46%
GOBP_TUBE_MORPHOGENESIS	GOBP_TUBE_MORPHOGENESIS		196	0.212186	0.889197	0.733467	0.857314	1	478	tags=19%, list=18%, signal=22%
GOBP_ALCOHOL_BIOSYNTHETIC_PROCESS	GOBP_ALCOHOL_BIOSYNTHETIC_PROCESS		40	0.28555	0.888757	0.643287	0.857559	1	415	tags=20%, list=15%, signal=23%
GOBP_EMBRYONIC_ORGAN_MORPHOGENESIS	GOBP_EMBRYONIC_ORGAN_MORPHOGENESIS		59	0.253659	0.88819	0.658252	0.858062	1	522	tags=20%, list=19%, signal=25%
GOBP_INTRINSIC_APOPTOTIC_SIGNALING_PATHWAY_BY_P53_CLASS_MEDIATOR	GOBP_INTRINSIC_APOPTOTIC_SIGNALING_PATHWAY_BY_P53_CLASS_MEDIATOR		15	0.276994	0.886062	0.613636	0.862548	1	80	tags=7%, list=3%, signal=7%
GOBP_POSITIVE_REGULATION_OF_CATALYTIC_ACTIVITY	GOBP_POSITIVE_REGULATION_OF_CATALYTIC_ACTIVITY		291	0.190061	0.886054	0.805785	0.861663	1	543	tags=22%, list=20%, signal=25%
GOBP_REGULATION_OF_PH	GOBP_REGULATION_OF_PH		21	0.325175	0.886	0.649193	0.860869	1	488	tags=29%, list=18%, signal=35%
GOBP_ISOPRENOID_METABOLIC_PROCESS	GOBP_ISOPRENOID_METABOLIC_PROCESS		20	0.353577	0.885322	0.647525	0.861614	1	44	tags=10%, list=2%, signal=10%
GOCC_PLASMA_MEMBRANE_RAFT	GOCC_PLASMA_MEMBRANE_RAFT		31	0.270326	0.884536	0.641618	0.862634	1	483	tags=26%, list=18%, signal=31%
GOBP_REGULATION_OF_T_CELL_ACTIVATION	GOBP_REGULATION_OF_T_CELL_ACTIVATION		63	0.252188	0.88436	0.664694	0.862147	1	295	tags=14%, list=11%, signal=16%
GOBP_RESPONSE_TO_XENOBIOTIC_STIMULUS	GOBP_RESPONSE_TO_XENOBIOTIC_STIMULUS		18	0.320338	0.883663	0.659491	0.862916	1	447	tags=28%, list=16%, signal=33%
GOBP_LEUKOCYTE_PROLIFERATION	GOBP_LEUKOCYTE_PROLIFERATION		54	0.259853	0.883248	0.683267	0.863101	1	116	tags=9%, list=4%, signal=9%
GOCC_ENDOCYTIC_VESICLE	GOCC_ENDOCYTIC_VESICLE		77	0.223711	0.882428	0.683398	0.864225	1	739	tags=34%, list=27%, signal=45%
GOCC_PERINUCLEAR_REGION_OF_CYTOPLASM	GOCC_PERINUCLEAR_REGION_OF_CYTOPLASM		142	0.196236	0.881852	0.727811	0.864781	1	548	tags=23%, list=20%, signal=28%
GOBP_POSITIVE_REGULATION_OF_STRESS_FIBER_ASSEMBLY	GOBP_POSITIVE_REGULATION_OF_STRESS_FIBER_ASSEMBLY		17	0.324883	0.881732	0.621514	0.864175	1	114	tags=12%, list=4%, signal=12%
GOCC_INTRINSIC_COMPONENT_OF_PLASMA_MEMBRANE	GOCC_INTRINSIC_COMPONENT_OF_PLASMA_MEMBRANE		330	0.202932	0.881146	0.879684	0.86474	1	494	tags=19%, list=18%, signal=20%
GOBP_CELL_PROJECTION_ASSEMBLY	GOBP_CELL_PROJECTION_ASSEMBLY		99	0.227195	0.880071	0.720682	0.866463	1	448	tags=20%, list=16%, signal=23%
GOBP_REGULATION_OF_PROTEIN_LOCALIZATION	GOBP_REGULATION_OF_PROTEIN_LOCALIZATION		193	0.197915	0.880059	0.74375	0.865603	1	545	tags=23%, list=20%, signal=26%
GOBP_METANEPHROS_DEVELOPMENT	GOBP_METANEPHROS_DEVELOPMENT		20	0.324034	0.880045	0.643011	0.864745	1	645	tags=35%, list=24%, signal=46%
GOBP_REGULATION_OF_CELLULAR_RESPONSE_TO_STRESS	GOBP_REGULATION_OF_CELLULAR_RESPONSE_TO_STRESS		151	0.196846	0.878523	0.710425	0.867603	1	528	tags=22%, list=19%, signal=26%
GOBP_RENAL_SYSTEM_PROCESS	GOBP_RENAL_SYSTEM_PROCESS		19	0.314781	0.878263	0.617155	0.867336	1	515	tags=32%, list=19%, signal=39%
GOBP_RESPONSE_TO_HYDROGEN_PEROXIDE	GOBP_RESPONSE_TO_HYDROGEN_PEROXIDE		25	0.267591	0.878201	0.649798	0.86663	1	93	tags=8%, list=3%, signal=8%
GOBP_ORGAN_GROWTH	GOBP_ORGAN_GROWTH		41	0.264555	0.877993	0.680498	0.866211	1	455	tags=22%, list=17%, signal=26%
GOBP_POSITIVE_REGULATION_OF_ION_TRANSPORT	GOBP_POSITIVE_REGULATION_OF_ION_TRANSPORT		140	0.199534	0.877857	0.748971	0.865677	1	427	tags=20%, list=16%, signal=22%
GOBP_PROTEIN_AUTOPHOSPHORYLATION	GOBP_PROTEIN_AUTOPHOSPHORYLATION		61	0.233726	0.877846	0.733202	0.864818	1	522	tags=25%, list=19%, signal=30%
GOCC_CILIARY_PLASM	GOCC_CILIARY_PLASM		18	0.33354	0.876913	0.617021	0.86622	1	164	tags=11%, list=6%, signal=12%
GOBP_GASTRULATION	GOBP_GASTRULATION		38	0.271363	0.876653	0.71063	0.865994	1	330	tags=18%, list=12%, signal=21%
GOBP_IN_UTERO_EMBRYONIC_DEVELOPMENT	GOBP_IN_UTERO_EMBRYONIC_DEVELOPMENT		67	0.229476	0.876576	0.655446	0.865303	1	719	tags=33%, list=26%, signal=44%
GOCC_CHROMOSOME_TELOMERIC_REGION	GOCC_CHROMOSOME_TELOMERIC_REGION		27	0.267875	0.876474	0.62549	0.864668	1	679	tags=33%, list=25%, signal=44%
GOBP_SENSORY_PERCEPTION_OF_LIGHT_STIMULUS	GOBP_SENSORY_PERCEPTION_OF_LIGHT_STIMULUS		44	0.262765	0.876433	0.692149	0.863887	1	327	tags=16%, list=12%, signal=18%
GOMF_LIGAND_ACTIVATED_TRANSCRIPTION_FACTOR_ACTIVITY	GOMF_LIGAND_ACTIVATED_TRANSCRIPTION_FACTOR_ACTIVITY		20	0.302232	0.875629	0.637597	0.864991	1	363	tags=25%, list=13%, signal=29%
GOBP_REGULATION_OF_CELLULAR_LOCALIZATION	GOBP_REGULATION_OF_CELLULAR_LOCALIZATION		178	0.188925	0.87491	0.737374	0.865834	1	502	tags=21%, list=18%, signal=24%
GOCC_POTASSIUM_CHANNEL_COMPLEX	GOCC_POTASSIUM_CHANNEL_COMPLEX		25	0.279033	0.874871	0.683468	0.865032	1	384	tags=16%, list=14%, signal=18%
GOCC_MICROTUBULE_CYTOSKELETON	GOCC_MICROTUBULE_CYTOSKELETON		188	0.200814	0.873412	0.74498	0.867612	1	545	tags=21%, list=20%, signal=25%
GOBP_NEGATIVE_REGULATION_OF_RESPONSE_TO_STIMULUS	GOBP_NEGATIVE_REGULATION_OF_RESPONSE_TO_STIMULUS		323	0.189762	0.873092	0.795031	0.867442	1	485	tags=18%, list=18%, signal=19%
GOCC_SYNAPSE	GOCC_SYNAPSE		319	0.174173	0.872576	0.837838	0.867784	1	531	tags=18%, list=19%, signal=20%
GOBP_ESTABLISHMENT_OF_PROTEIN_LOCALIZATION_TO_ORGANELLE	GOBP_ESTABLISHMENT_OF_PROTEIN_LOCALIZATION_TO_ORGANELLE		136	0.173401	0.872216	0.688492	0.86778	1	465	tags=18%, list=17%, signal=21%
GOBP_REGULATION_OF_CELLULAR_PROTEIN_LOCALIZATION	GOBP_REGULATION_OF_CELLULAR_PROTEIN_LOCALIZATION		131	0.195503	0.871259	0.735887	0.869185	1	521	tags=22%, list=19%, signal=26%
GOBP_SIGNAL_TRANSDUCTION_BY_P53_CLASS_MEDIATOR	GOBP_SIGNAL_TRANSDUCTION_BY_P53_CLASS_MEDIATOR		58	0.241364	0.871004	0.697211	0.868922	1	238	tags=14%, list=9%, signal=15%
GOCC_SECRETORY_GRANULE	GOCC_SECRETORY_GRANULE		149	0.207325	0.870846	0.712274	0.86845	1	509	tags=21%, list=19%, signal=25%
GOBP_EPITHELIAL_TUBE_FORMATION	GOBP_EPITHELIAL_TUBE_FORMATION		24	0.299738	0.870671	0.716832	0.867968	1	584	tags=25%, list=21%, signal=32%
GOMF_MOLECULAR_TRANSDUCER_ACTIVITY	GOMF_MOLECULAR_TRANSDUCER_ACTIVITY		190	0.205438	0.869081	0.841085	0.870937	1	439	tags=15%, list=16%, signal=17%
GOCC_VESICLE_MEMBRANE	GOCC_VESICLE_MEMBRANE		160	0.194237	0.868497	0.708812	0.871457	1	606	tags=23%, list=22%, signal=28%
GOBP_LEUKOCYTE_CELL_CELL_ADHESION	GOBP_LEUKOCYTE_CELL_CELL_ADHESION		73	0.24131	0.867908	0.673347	0.871918	1	330	tags=15%, list=12%, signal=17%
GOBP_REGULATION_OF_NERVOUS_SYSTEM_DEVELOPMENT	GOBP_REGULATION_OF_NERVOUS_SYSTEM_DEVELOPMENT		101	0.21117	0.867902	0.754032	0.871061	1	267	tags=12%, list=10%, signal=13%
GOBP_STEROL_HOMEOSTASIS	GOBP_STEROL_HOMEOSTASIS		16	0.342544	0.867548	0.665992	0.871063	1	295	tags=25%, list=11%, signal=28%
GOBP_POSITIVE_REGULATION_OF_IMMUNE_RESPONSE	GOBP_POSITIVE_REGULATION_OF_IMMUNE_RESPONSE		103	0.21546	0.867366	0.661355	0.870589	1	350	tags=14%, list=13%, signal=15%
GOBP_POSITIVE_REGULATION_OF_WOUND_HEALING	GOBP_POSITIVE_REGULATION_OF_WOUND_HEALING		17	0.310968	0.867164	0.638384	0.870204	1	725	tags=29%, list=27%, signal=40%
GOBP_NEGATIVE_REGULATION_OF_T_CELL_PROLIFERATION	GOBP_NEGATIVE_REGULATION_OF_T_CELL_PROLIFERATION		16	0.325777	0.867156	0.630648	0.869359	1	40	tags=6%, list=1%, signal=6%
GOBP_NEGATIVE_REGULATION_OF_LEUKOCYTE_PROLIFERATION	GOBP_NEGATIVE_REGULATION_OF_LEUKOCYTE_PROLIFERATION		16	0.325777	0.867156	0.630648	0.86849	1	40	tags=6%, list=1%, signal=6%
GOMF_UBIQUITIN_LIKE_PROTEIN_TRANSFERASE_ACTIVITY	GOMF_UBIQUITIN_LIKE_PROTEIN_TRANSFERASE_ACTIVITY		84	0.217509	0.866248	0.667319	0.869749	1	589	tags=25%, list=22%, signal=31%
GOBP_REGULATION_OF_STRIATED_MUSCLE_CONTRACTION	GOBP_REGULATION_OF_STRIATED_MUSCLE_CONTRACTION		18	0.318711	0.866214	0.647059	0.868957	1	868	tags=56%, list=32%, signal=81%
GOBP_REGULATION_OF_CARDIAC_MUSCLE_CONTRACTION	GOBP_REGULATION_OF_CARDIAC_MUSCLE_CONTRACTION		18	0.318711	0.866214	0.647059	0.86809	1	868	tags=56%, list=32%, signal=81%
GOBP_ACTOMYOSIN_STRUCTURE_ORGANIZATION	GOBP_ACTOMYOSIN_STRUCTURE_ORGANIZATION		56	0.238067	0.866128	0.702213	0.867433	1	584	tags=23%, list=21%, signal=29%
GOBP_POSITIVE_REGULATION_OF_AXONOGENESIS	GOBP_POSITIVE_REGULATION_OF_AXONOGENESIS		25	0.283257	0.86577	0.654545	0.867384	1	337	tags=20%, list=12%, signal=23%
GOBP_REGIONALIZATION	GOBP_REGIONALIZATION		71	0.241224	0.865274	0.714286	0.867624	1	455	tags=21%, list=17%, signal=25%
GOBP_REGULATION_OF_CELL_SIZE	GOBP_REGULATION_OF_CELL_SIZE		51	0.230311	0.865073	0.687623	0.867239	1	421	tags=20%, list=15%, signal=23%
GOBP_REGULATION_OF_CELL_CYCLE_ARREST	GOBP_REGULATION_OF_CELL_CYCLE_ARREST		19	0.31903	0.864871	0.674089	0.866861	1	512	tags=42%, list=19%, signal=51%
GOBP_REGULATION_OF_HEART_GROWTH	GOBP_REGULATION_OF_HEART_GROWTH		23	0.292401	0.861375	0.706693	0.874066	1	248	tags=17%, list=9%, signal=19%
GOBP_TUMOR_NECROSIS_FACTOR_MEDIATED_SIGNALING_PATHWAY	GOBP_TUMOR_NECROSIS_FACTOR_MEDIATED_SIGNALING_PATHWAY		28	0.250288	0.859295	0.684825	0.877818	1	762	tags=32%, list=28%, signal=44%
GOBP_LIPID_HOMEOSTASIS	GOBP_LIPID_HOMEOSTASIS		27	0.290782	0.859225	0.726166	0.877099	1	389	tags=26%, list=14%, signal=30%
GOBP_ANTIGEN_PROCESSING_AND_PRESENTATION_OF_PEPTIDE_ANTIGEN	GOBP_ANTIGEN_PROCESSING_AND_PRESENTATION_OF_PEPTIDE_ANTIGEN		34	0.269484	0.859102	0.698795	0.876523	1	659	tags=32%, list=24%, signal=42%
GOBP_VESICLE_LOCALIZATION	GOBP_VESICLE_LOCALIZATION		54	0.225295	0.856618	0.691983	0.881375	1	742	tags=30%, list=27%, signal=40%
GOBP_REGULATION_OF_DNA_RECOMBINATION	GOBP_REGULATION_OF_DNA_RECOMBINATION		17	0.30383	0.856226	0.680934	0.881415	1	132	tags=12%, list=5%, signal=12%
GOBP_NEGATIVE_REGULATION_OF_SIGNALING	GOBP_NEGATIVE_REGULATION_OF_SIGNALING		272	0.193356	0.855849	0.819707	0.881428	1	502	tags=19%, list=18%, signal=21%
GOBP_ANTIGEN_PROCESSING_AND_PRESENTATION_OF_PEPTIDE_OR_POLYSACCHARIDE_ANTIGEN_VIA_MHC_CLASS_II	GOBP_ANTIGEN_PROCESSING_AND_PRESENTATION_OF_PEPTIDE_OR_POLYSACCHARIDE_ANTIGEN_VIA_MHC_CLASS_II		17	0.320364	0.854921	0.691983	0.882659	1	659	tags=29%, list=24%, signal=39%
GOBP_POSITIVE_REGULATION_OF_IMMUNE_SYSTEM_PROCESS	GOBP_POSITIVE_REGULATION_OF_IMMUNE_SYSTEM_PROCESS		155	0.204341	0.854432	0.724346	0.882884	1	411	tags=15%, list=15%, signal=16%
GOBP_STRIATED_MUSCLE_CELL_DEVELOPMENT	GOBP_STRIATED_MUSCLE_CELL_DEVELOPMENT		30	0.272341	0.853658	0.713472	0.883792	1	411	tags=20%, list=15%, signal=23%
GOMF_RNA_POLYMERASE_II_SPECIFIC_DNA_BINDING_TRANSCRIPTION_FACTOR_BINDING	GOMF_RNA_POLYMERASE_II_SPECIFIC_DNA_BINDING_TRANSCRIPTION_FACTOR_BINDING		67	0.206103	0.852418	0.742798	0.885783	1	609	tags=27%, list=22%, signal=34%
GOCC_CYTOPLASMIC_REGION	GOCC_CYTOPLASMIC_REGION		53	0.232791	0.851659	0.724731	0.886696	1	442	tags=17%, list=16%, signal=20%
GOBP_MONOVALENT_INORGANIC_CATION_HOMEOSTASIS	GOBP_MONOVALENT_INORGANIC_CATION_HOMEOSTASIS		37	0.253471	0.851259	0.708758	0.886734	1	488	tags=22%, list=18%, signal=26%
GOBP_REGULATION_OF_ACTIN_FILAMENT_ORGANIZATION	GOBP_REGULATION_OF_ACTIN_FILAMENT_ORGANIZATION		63	0.232429	0.848674	0.756098	0.891572	1	114	tags=8%, list=4%, signal=8%
GOBP_REGULATION_OF_SUBSTRATE_ADHESION_DEPENDENT_CELL_SPREADING	GOBP_REGULATION_OF_SUBSTRATE_ADHESION_DEPENDENT_CELL_SPREADING		15	0.346092	0.848395	0.678068	0.891328	1	297	tags=27%, list=11%, signal=30%
GOBP_NERVE_DEVELOPMENT	GOBP_NERVE_DEVELOPMENT		23	0.269323	0.848333	0.734694	0.890617	1	316	tags=22%, list=12%, signal=24%
GOBP_STEM_CELL_DIFFERENTIATION	GOBP_STEM_CELL_DIFFERENTIATION		64	0.234645	0.84764	0.738703	0.89132	1	471	tags=19%, list=17%, signal=22%
GOBP_POSITIVE_REGULATION_OF_WNT_SIGNALING_PATHWAY	GOBP_POSITIVE_REGULATION_OF_WNT_SIGNALING_PATHWAY		33	0.25237	0.847087	0.718876	0.891682	1	76	tags=6%, list=3%, signal=6%
GOBP_ESTABLISHMENT_OF_PROTEIN_LOCALIZATION_TO_ENDOPLASMIC_RETICULUM	GOBP_ESTABLISHMENT_OF_PROTEIN_LOCALIZATION_TO_ENDOPLASMIC_RETICULUM		39	0.202702	0.845486	0.641975	0.89429	1	1104	tags=67%, list=41%, signal=110%
GOBP_REGULATION_OF_CYTOKINESIS	GOBP_REGULATION_OF_CYTOKINESIS		15	0.310086	0.845269	0.685535	0.893948	1	497	tags=40%, list=18%, signal=49%
GOCC_UBIQUITIN_LIGASE_COMPLEX	GOCC_UBIQUITIN_LIGASE_COMPLEX		43	0.238028	0.845171	0.670476	0.893275	1	465	tags=21%, list=17%, signal=25%
GOCC_TRANSPORTER_COMPLEX	GOCC_TRANSPORTER_COMPLEX		73	0.210719	0.844951	0.742515	0.892888	1	384	tags=15%, list=14%, signal=17%
GOBP_AXIS_SPECIFICATION	GOBP_AXIS_SPECIFICATION		19	0.309394	0.844789	0.698795	0.892407	1	219	tags=16%, list=8%, signal=17%
GOBP_REGULATION_OF_STEROID_METABOLIC_PROCESS	GOBP_REGULATION_OF_STEROID_METABOLIC_PROCESS		27	0.285734	0.844266	0.732558	0.892702	1	594	tags=26%, list=22%, signal=33%
GOBP_AMEBOIDAL_TYPE_CELL_MIGRATION	GOBP_AMEBOIDAL_TYPE_CELL_MIGRATION		106	0.230314	0.843168	0.757143	0.894258	1	493	tags=25%, list=18%, signal=29%
GOCC_NEURON_PROJECTION	GOCC_NEURON_PROJECTION		279	0.187209	0.843062	0.910638	0.893626	1	485	tags=19%, list=18%, signal=20%
GOBP_EXOCYTOSIS	GOBP_EXOCYTOSIS		178	0.195346	0.84294	0.789047	0.893013	1	488	tags=19%, list=18%, signal=22%
GOBP_REGULATION_OF_BONE_MINERALIZATION	GOBP_REGULATION_OF_BONE_MINERALIZATION		15	0.318342	0.842356	0.715789	0.893429	1	421	tags=27%, list=15%, signal=31%
GOBP_POSITIVE_REGULATION_OF_CELL_CELL_ADHESION	GOBP_POSITIVE_REGULATION_OF_CELL_CELL_ADHESION		55	0.244842	0.841985	0.730061	0.89339	1	330	tags=18%, list=12%, signal=20%
GOBP_ENDOCRINE_SYSTEM_DEVELOPMENT	GOBP_ENDOCRINE_SYSTEM_DEVELOPMENT		36	0.256638	0.84174	0.740506	0.893027	1	272	tags=17%, list=10%, signal=18%
GOBP_POSITIVE_REGULATION_OF_HORMONE_SECRETION	GOBP_POSITIVE_REGULATION_OF_HORMONE_SECRETION		29	0.239592	0.841646	0.709234	0.892362	1	493	tags=17%, list=18%, signal=21%
GOBP_DNA_DEPENDENT_DNA_REPLICATION	GOBP_DNA_DEPENDENT_DNA_REPLICATION		27	0.250261	0.840892	0.733333	0.893282	1	496	tags=26%, list=18%, signal=31%
GOBP_POSITIVE_REGULATION_OF_ACTIN_FILAMENT_BUNDLE_ASSEMBLY	GOBP_POSITIVE_REGULATION_OF_ACTIN_FILAMENT_BUNDLE_ASSEMBLY		19	0.301829	0.840503	0.70751	0.893338	1	114	tags=11%, list=4%, signal=11%
GOBP_POSITIVE_REGULATION_OF_ERK1_AND_ERK2_CASCADE	GOBP_POSITIVE_REGULATION_OF_ERK1_AND_ERK2_CASCADE		36	0.25787	0.840389	0.759596	0.892733	1	455	tags=22%, list=17%, signal=26%
GOBP_COGNITION	GOBP_COGNITION		46	0.237975	0.839749	0.770459	0.893283	1	494	tags=26%, list=18%, signal=31%
GOBP_REGULATION_OF_JUN_KINASE_ACTIVITY	GOBP_REGULATION_OF_JUN_KINASE_ACTIVITY		26	0.269779	0.83911	0.710983	0.893796	1	539	tags=19%, list=20%, signal=24%
GOBP_CARDIAC_MUSCLE_CELL_DIFFERENTIATION	GOBP_CARDIAC_MUSCLE_CELL_DIFFERENTIATION		23	0.293635	0.838323	0.706	0.894581	1	455	tags=35%, list=17%, signal=41%
GOBP_CYTOKINE_MEDIATED_SIGNALING_PATHWAY	GOBP_CYTOKINE_MEDIATED_SIGNALING_PATHWAY		129	0.220169	0.838015	0.785171	0.894388	1	411	tags=19%, list=15%, signal=21%
GOBP_NEURON_MIGRATION	GOBP_NEURON_MIGRATION		35	0.236737	0.837757	0.741525	0.894091	1	399	tags=17%, list=15%, signal=20%
GOBP_NEGATIVE_REGULATION_OF_MULTICELLULAR_ORGANISMAL_PROCESS	GOBP_NEGATIVE_REGULATION_OF_MULTICELLULAR_ORGANISMAL_PROCESS		208	0.196771	0.83772	0.857422	0.893308	1	471	tags=17%, list=17%, signal=19%
GOBP_EPHRIN_RECEPTOR_SIGNALING_PATHWAY	GOBP_EPHRIN_RECEPTOR_SIGNALING_PATHWAY		25	0.265382	0.837262	0.695219	0.893397	1	326	tags=16%, list=12%, signal=18%
GOBP_CARDIAC_MUSCLE_TISSUE_MORPHOGENESIS	GOBP_CARDIAC_MUSCLE_TISSUE_MORPHOGENESIS		15	0.312752	0.837069	0.699605	0.892953	1	9	tags=7%, list=0%, signal=7%
GOBP_EMBRYONIC_SKELETAL_SYSTEM_MORPHOGENESIS	GOBP_EMBRYONIC_SKELETAL_SYSTEM_MORPHOGENESIS		20	0.288772	0.834682	0.670476	0.897025	1	645	tags=25%, list=24%, signal=33%
GOBP_REGULATION_OF_SUPRAMOLECULAR_FIBER_ORGANIZATION	GOBP_REGULATION_OF_SUPRAMOLECULAR_FIBER_ORGANIZATION		84	0.21627	0.83458	0.781746	0.896399	1	411	tags=17%, list=15%, signal=19%
GOBP_ANTERIOR_POSTERIOR_PATTERN_SPECIFICATION	GOBP_ANTERIOR_POSTERIOR_PATTERN_SPECIFICATION		45	0.249838	0.833978	0.749499	0.896776	1	272	tags=13%, list=10%, signal=15%
GOBP_GLUTAMINE_FAMILY_AMINO_ACID_METABOLIC_PROCESS	GOBP_GLUTAMINE_FAMILY_AMINO_ACID_METABOLIC_PROCESS		20	0.327139	0.833922	0.690476	0.896052	1	303	tags=25%, list=11%, signal=28%
GOBP_ORGANELLE_TRANSPORT_ALONG_MICROTUBULE	GOBP_ORGANELLE_TRANSPORT_ALONG_MICROTUBULE		22	0.258224	0.833912	0.704782	0.895221	1	545	tags=27%, list=20%, signal=34%
GOBP_MORPHOGENESIS_OF_AN_EPITHELIUM	GOBP_MORPHOGENESIS_OF_AN_EPITHELIUM		118	0.208357	0.83359	0.8375	0.895055	1	292	tags=11%, list=11%, signal=12%
GOCC_EARLY_ENDOSOME	GOCC_EARLY_ENDOSOME		86	0.203657	0.831588	0.780684	0.898468	1	518	tags=21%, list=19%, signal=25%
GOBP_MYOTUBE_DIFFERENTIATION	GOBP_MYOTUBE_DIFFERENTIATION		27	0.255544	0.830059	0.712355	0.900872	1	44	tags=7%, list=2%, signal=7%
GOBP_PIGMENTATION	GOBP_PIGMENTATION		23	0.242499	0.829859	0.745342	0.900423	1	515	tags=26%, list=19%, signal=32%
GOMF_SH3_DOMAIN_BINDING	GOMF_SH3_DOMAIN_BINDING		39	0.253425	0.828956	0.715789	0.901402	1	354	tags=18%, list=13%, signal=20%
GOBP_CELL_CELL_JUNCTION_ORGANIZATION	GOBP_CELL_CELL_JUNCTION_ORGANIZATION		49	0.220919	0.828954	0.807692	0.900556	1	436	tags=18%, list=16%, signal=21%
GOBP_CELLULAR_RESPONSE_TO_LIGHT_STIMULUS	GOBP_CELLULAR_RESPONSE_TO_LIGHT_STIMULUS		28	0.249779	0.828743	0.74538	0.900152	1	294	tags=18%, list=11%, signal=20%
GOCC_INCLUSION_BODY	GOCC_INCLUSION_BODY		19	0.26983	0.827411	0.688588	0.902068	1	760	tags=47%, list=28%, signal=65%
GOBP_REGULATION_OF_RESPONSE_TO_EXTERNAL_STIMULUS	GOBP_REGULATION_OF_RESPONSE_TO_EXTERNAL_STIMULUS		179	0.188828	0.827057	0.895492	0.90194	1	328	tags=12%, list=12%, signal=12%
GOBP_HEMATOPOIETIC_STEM_CELL_DIFFERENTIATION	GOBP_HEMATOPOIETIC_STEM_CELL_DIFFERENTIATION		20	0.280202	0.826066	0.715164	0.903235	1	13	tags=5%, list=0%, signal=5%
GOBP_REGULATION_OF_STEROID_BIOSYNTHETIC_PROCESS	GOBP_REGULATION_OF_STEROID_BIOSYNTHETIC_PROCESS		23	0.288177	0.825934	0.751479	0.902674	1	594	tags=26%, list=22%, signal=33%
GOMF_TUBULIN_BINDING	GOMF_TUBULIN_BINDING		65	0.200408	0.825352	0.774793	0.90303	1	510	tags=23%, list=19%, signal=28%
GOBP_ORGANONITROGEN_COMPOUND_CATABOLIC_PROCESS	GOBP_ORGANONITROGEN_COMPOUND_CATABOLIC_PROCESS		270	0.170061	0.825129	0.907216	0.902632	1	533	tags=18%, list=20%, signal=20%
GOBP_NEGATIVE_REGULATION_OF_CANONICAL_WNT_SIGNALING_PATHWAY	GOBP_NEGATIVE_REGULATION_OF_CANONICAL_WNT_SIGNALING_PATHWAY		36	0.243846	0.823658	0.696356	0.904917	1	209	tags=8%, list=8%, signal=9%
GOBP_REGULATION_OF_LIPID_BIOSYNTHETIC_PROCESS	GOBP_REGULATION_OF_LIPID_BIOSYNTHETIC_PROCESS		41	0.267325	0.823159	0.821206	0.904998	1	144	tags=12%, list=5%, signal=13%
GOMF_NUCLEOSIDE_TRIPHOSPHATASE_REGULATOR_ACTIVITY	GOMF_NUCLEOSIDE_TRIPHOSPHATASE_REGULATOR_ACTIVITY		92	0.192002	0.822243	0.823529	0.905966	1	327	tags=14%, list=12%, signal=16%
GOBP_ANTIGEN_PROCESSING_AND_PRESENTATION	GOBP_ANTIGEN_PROCESSING_AND_PRESENTATION		42	0.251402	0.822102	0.746615	0.905395	1	659	tags=29%, list=24%, signal=37%
GOBP_TISSUE_MORPHOGENESIS	GOBP_TISSUE_MORPHOGENESIS		145	0.20354	0.821508	0.879747	0.905796	1	299	tags=11%, list=11%, signal=12%
GOBP_ACTIN_CYTOSKELETON_REORGANIZATION	GOBP_ACTIN_CYTOSKELETON_REORGANIZATION		26	0.268941	0.821498	0.749446	0.904967	1	313	tags=19%, list=11%, signal=22%
GOBP_CELLULAR_SENESCENCE	GOBP_CELLULAR_SENESCENCE		15	0.331485	0.820746	0.743952	0.90562	1	50	tags=13%, list=2%, signal=14%
GOBP_NEGATIVE_REGULATION_OF_PROTEOLYSIS	GOBP_NEGATIVE_REGULATION_OF_PROTEOLYSIS		55	0.203298	0.820246	0.781818	0.905868	1	110	tags=7%, list=4%, signal=7%
GOBP_GOLGI_ORGANIZATION	GOBP_GOLGI_ORGANIZATION		25	0.23109	0.819737	0.708075	0.906001	1	748	tags=36%, list=27%, signal=49%
GOBP_T_CELL_PROLIFERATION	GOBP_T_CELL_PROLIFERATION		40	0.257056	0.817979	0.766082	0.908603	1	116	tags=10%, list=4%, signal=10%
GOBP_REGULATION_OF_CELL_ACTIVATION	GOBP_REGULATION_OF_CELL_ACTIVATION		97	0.221257	0.817784	0.797217	0.908163	1	485	tags=18%, list=18%, signal=21%
GOBP_CELLULAR_RESPONSE_TO_RADIATION	GOBP_CELLULAR_RESPONSE_TO_RADIATION		43	0.233203	0.816808	0.795547	0.909323	1	294	tags=14%, list=11%, signal=15%
GOMF_CARGO_RECEPTOR_ACTIVITY	GOMF_CARGO_RECEPTOR_ACTIVITY		18	0.30052	0.816725	0.682927	0.908665	1	409	tags=28%, list=15%, signal=32%
GOBP_REGULATION_OF_LIPID_LOCALIZATION	GOBP_REGULATION_OF_LIPID_LOCALIZATION		31	0.249018	0.816311	0.785571	0.908632	1	411	tags=16%, list=15%, signal=19%
GOBP_ADAPTIVE_THERMOGENESIS	GOBP_ADAPTIVE_THERMOGENESIS		35	0.252987	0.815859	0.770588	0.908647	1	243	tags=11%, list=9%, signal=12%
GOBP_CELL_DEATH_IN_RESPONSE_TO_OXIDATIVE_STRESS	GOBP_CELL_DEATH_IN_RESPONSE_TO_OXIDATIVE_STRESS		17	0.269463	0.815795	0.711069	0.907974	1	773	tags=41%, list=28%, signal=57%
GOBP_REGULATION_OF_CELL_CELL_ADHESION	GOBP_REGULATION_OF_CELL_CELL_ADHESION		89	0.219738	0.815368	0.803456	0.907976	1	330	tags=15%, list=12%, signal=16%
GOBP_NEGATIVE_REGULATION_OF_CHEMOTAXIS	GOBP_NEGATIVE_REGULATION_OF_CHEMOTAXIS		15	0.296398	0.814497	0.72888	0.908878	1	128	tags=13%, list=5%, signal=14%
GOBP_POSITIVE_REGULATION_OF_COLD_INDUCED_THERMOGENESIS	GOBP_POSITIVE_REGULATION_OF_COLD_INDUCED_THERMOGENESIS		22	0.29177	0.814089	0.778443	0.908807	1	734	tags=41%, list=27%, signal=56%
GOBP_ORGANELLE_MEMBRANE_FUSION	GOBP_ORGANELLE_MEMBRANE_FUSION		25	0.265084	0.811626	0.773832	0.912677	1	693	tags=36%, list=25%, signal=48%
GOBP_NEGATIVE_REGULATION_OF_PROTEASOMAL_PROTEIN_CATABOLIC_PROCESS	GOBP_NEGATIVE_REGULATION_OF_PROTEASOMAL_PROTEIN_CATABOLIC_PROCESS		15	0.261064	0.811263	0.717172	0.91255	1	63	tags=7%, list=2%, signal=7%
GOBP_REGULATION_OF_G_PROTEIN_COUPLED_RECEPTOR_SIGNALING_PATHWAY	GOBP_REGULATION_OF_G_PROTEIN_COUPLED_RECEPTOR_SIGNALING_PATHWAY		26	0.272945	0.809499	0.720978	0.915067	1	545	tags=23%, list=20%, signal=29%
GOMF_RIBONUCLEOTIDE_BINDING	GOMF_RIBONUCLEOTIDE_BINDING		398	0.171819	0.809423	0.96109	0.914365	1	543	tags=19%, list=20%, signal=20%
GOCC_CAVEOLA	GOCC_CAVEOLA		21	0.275145	0.809163	0.763462	0.914059	1	221	tags=19%, list=8%, signal=21%
GOBP_NEPHRON_DEVELOPMENT	GOBP_NEPHRON_DEVELOPMENT		32	0.268337	0.808846	0.806584	0.913848	1	645	tags=38%, list=24%, signal=49%
GOBP_CELLULAR_RESPONSE_TO_BIOTIC_STIMULUS	GOBP_CELLULAR_RESPONSE_TO_BIOTIC_STIMULUS		35	0.222315	0.808446	0.764948	0.913775	1	385	tags=14%, list=14%, signal=16%
GOCC_SPECIFIC_GRANULE	GOCC_SPECIFIC_GRANULE		30	0.257996	0.808434	0.729622	0.91296	1	739	tags=33%, list=27%, signal=45%
GOMF_LIGAND_GATED_ION_CHANNEL_ACTIVITY	GOMF_LIGAND_GATED_ION_CHANNEL_ACTIVITY		36	0.242193	0.807846	0.814453	0.913196	1	987	tags=53%, list=36%, signal=82%
GOBP_REGULATION_OF_MUSCLE_SYSTEM_PROCESS	GOBP_REGULATION_OF_MUSCLE_SYSTEM_PROCESS		52	0.22442	0.807011	0.794118	0.913949	1	732	tags=35%, list=27%, signal=46%
GOBP_REGULATION_OF_MICROTUBULE_POLYMERIZATION_OR_DEPOLYMERIZATION	GOBP_REGULATION_OF_MICROTUBULE_POLYMERIZATION_OR_DEPOLYMERIZATION		21	0.263493	0.804561	0.744511	0.917776	1	459	tags=24%, list=17%, signal=28%
GOBP_ACTIN_FILAMENT_DEPOLYMERIZATION	GOBP_ACTIN_FILAMENT_DEPOLYMERIZATION		19	0.275862	0.80419	0.75502	0.917657	1	483	tags=32%, list=18%, signal=38%
GOBP_REGULATION_OF_BODY_FLUID_LEVELS	GOBP_REGULATION_OF_BODY_FLUID_LEVELS		114	0.207632	0.802246	0.864646	0.920454	1	474	tags=19%, list=17%, signal=22%
GOBP_REGULATION_OF_CALCIUM_ION_TRANSMEMBRANE_TRANSPORTER_ACTIVITY	GOBP_REGULATION_OF_CALCIUM_ION_TRANSMEMBRANE_TRANSPORTER_ACTIVITY		17	0.269363	0.80224	0.735471	0.91963	1	426	tags=24%, list=16%, signal=28%
GOBP_IRON_ION_HOMEOSTASIS	GOBP_IRON_ION_HOMEOSTASIS		19	0.284897	0.801454	0.74269	0.920261	1	658	tags=42%, list=24%, signal=55%
GOBP_POSITIVE_REGULATION_OF_CYTOSKELETON_ORGANIZATION	GOBP_POSITIVE_REGULATION_OF_CYTOSKELETON_ORGANIZATION		55	0.243973	0.801355	0.779141	0.919601	1	421	tags=20%, list=15%, signal=23%
GOBP_POSITIVE_REGULATION_OF_TRANSPORTER_ACTIVITY	GOBP_POSITIVE_REGULATION_OF_TRANSPORTER_ACTIVITY		26	0.236031	0.79978	0.793878	0.921652	1	426	tags=19%, list=16%, signal=23%
GOCC_NUCLEAR_OUTER_MEMBRANE_ENDOPLASMIC_RETICULUM_MEMBRANE_NETWORK	GOCC_NUCLEAR_OUTER_MEMBRANE_ENDOPLASMIC_RETICULUM_MEMBRANE_NETWORK		174	0.177701	0.799301	0.838403	0.921671	1	653	tags=24%, list=24%, signal=30%
GOCC_APICAL_PLASMA_MEMBRANE	GOCC_APICAL_PLASMA_MEMBRANE		75	0.212356	0.798433	0.922925	0.922432	1	406	tags=19%, list=15%, signal=21%
GOBP_POSITIVE_REGULATION_OF_SIGNALING	GOBP_POSITIVE_REGULATION_OF_SIGNALING		344	0.173112	0.798317	0.96008	0.921832	1	515	tags=18%, list=19%, signal=19%
GOCC_MEMBRANE_MICRODOMAIN	GOCC_MEMBRANE_MICRODOMAIN		79	0.211265	0.797467	0.865347	0.922563	1	365	tags=16%, list=13%, signal=18%
GOBP_REGULATION_OF_VASOCONSTRICTION	GOBP_REGULATION_OF_VASOCONSTRICTION		16	0.309461	0.79541	0.794239	0.925393	1	709	tags=44%, list=26%, signal=59%
GOMF_ENDOPEPTIDASE_ACTIVITY	GOMF_ENDOPEPTIDASE_ACTIVITY		81	0.214931	0.795312	0.90998	0.924742	1	329	tags=11%, list=12%, signal=12%
GOBP_LYMPHOCYTE_MEDIATED_IMMUNITY	GOBP_LYMPHOCYTE_MEDIATED_IMMUNITY		32	0.248086	0.795227	0.802846	0.924075	1	116	tags=9%, list=4%, signal=10%
GOBP_REGULATION_OF_LIPID_METABOLIC_PROCESS	GOBP_REGULATION_OF_LIPID_METABOLIC_PROCESS		81	0.221191	0.794844	0.891129	0.923886	1	437	tags=21%, list=16%, signal=24%
GOMF_PHOSPHORIC_DIESTER_HYDROLASE_ACTIVITY	GOMF_PHOSPHORIC_DIESTER_HYDROLASE_ACTIVITY		22	0.284202	0.794758	0.820041	0.923185	1	883	tags=59%, list=32%, signal=87%
GOBP_CELLULAR_MACROMOLECULE_CATABOLIC_PROCESS	GOBP_CELLULAR_MACROMOLECULE_CATABOLIC_PROCESS		248	0.148672	0.793932	0.868885	0.923743	1	831	tags=31%, list=31%, signal=40%
GOBP_SENSORY_PERCEPTION	GOBP_SENSORY_PERCEPTION		111	0.199312	0.793228	0.912317	0.924105	1	637	tags=24%, list=23%, signal=30%
GOBP_PROTEIN_K63_LINKED_UBIQUITINATION	GOBP_PROTEIN_K63_LINKED_UBIQUITINATION		16	0.254671	0.792273	0.741551	0.925003	1	820	tags=38%, list=30%, signal=53%
GOBP_MICROTUBULE_POLYMERIZATION_OR_DEPOLYMERIZATION	GOBP_MICROTUBULE_POLYMERIZATION_OR_DEPOLYMERIZATION		29	0.237584	0.792269	0.76938	0.924184	1	835	tags=48%, list=31%, signal=69%
GOBP_ANIMAL_ORGAN_FORMATION	GOBP_ANIMAL_ORGAN_FORMATION		22	0.267098	0.79196	0.788307	0.923904	1	433	tags=27%, list=16%, signal=32%
GOBP_CELLULAR_RESPONSE_TO_IONIZING_RADIATION	GOBP_CELLULAR_RESPONSE_TO_IONIZING_RADIATION		16	0.305712	0.788939	0.766734	0.928302	1	13	tags=6%, list=0%, signal=6%
GOBP_REGULATION_OF_TRANSCRIPTION_FROM_RNA_POLYMERASE_II_PROMOTER_IN_RESPONSE_TO_HYPOXIA	GOBP_REGULATION_OF_TRANSCRIPTION_FROM_RNA_POLYMERASE_II_PROMOTER_IN_RESPONSE_TO_HYPOXIA		19	0.272248	0.788406	0.736402	0.928368	1	890	tags=42%, list=33%, signal=62%
GOBP_FOREBRAIN_GENERATION_OF_NEURONS	GOBP_FOREBRAIN_GENERATION_OF_NEURONS		16	0.291751	0.788194	0.767578	0.927933	1	214	tags=13%, list=8%, signal=13%
GOCC_SPINDLE	GOCC_SPINDLE		65	0.204554	0.785815	0.801653	0.931281	1	307	tags=14%, list=11%, signal=15%
GOBP_POSTSYNAPSE_ORGANIZATION	GOBP_POSTSYNAPSE_ORGANIZATION		44	0.220029	0.784266	0.834016	0.933115	1	292	tags=16%, list=11%, signal=18%
GOBP_POSITIVE_REGULATION_OF_APOPTOTIC_SIGNALING_PATHWAY	GOBP_POSITIVE_REGULATION_OF_APOPTOTIC_SIGNALING_PATHWAY		34	0.220007	0.783137	0.802734	0.93417	1	389	tags=15%, list=14%, signal=17%
GOBP_RESPONSE_TO_TYPE_I_INTERFERON	GOBP_RESPONSE_TO_TYPE_I_INTERFERON		19	0.324769	0.782657	0.75514	0.934137	1	373	tags=21%, list=14%, signal=24%
GOBP_POSITIVE_REGULATION_OF_ESTABLISHMENT_OF_PROTEIN_LOCALIZATION_TO_MITOCHONDRION	GOBP_POSITIVE_REGULATION_OF_ESTABLISHMENT_OF_PROTEIN_LOCALIZATION_TO_MITOCHONDRION		17	0.261564	0.781971	0.747454	0.934485	1	389	tags=24%, list=14%, signal=27%
GOBP_ESTABLISHMENT_OF_TISSUE_POLARITY	GOBP_ESTABLISHMENT_OF_TISSUE_POLARITY		21	0.266174	0.780859	0.768595	0.935551	1	13	tags=5%, list=0%, signal=5%
GOBP_PEPTIDE_HORMONE_SECRETION	GOBP_PEPTIDE_HORMONE_SECRETION		51	0.213093	0.779403	0.848421	0.937187	1	130	tags=8%, list=5%, signal=8%
GOCC_BRUSH_BORDER	GOCC_BRUSH_BORDER		29	0.242028	0.778507	0.873494	0.937773	1	395	tags=21%, list=15%, signal=24%
GOMF_EXTRACELLULAR_LIGAND_GATED_ION_CHANNEL_ACTIVITY	GOMF_EXTRACELLULAR_LIGAND_GATED_ION_CHANNEL_ACTIVITY		18	0.271675	0.776144	0.81323	0.940951	1	544	tags=28%, list=20%, signal=34%
GOMF_NEUROTRANSMITTER_RECEPTOR_ACTIVITY	GOMF_NEUROTRANSMITTER_RECEPTOR_ACTIVITY		21	0.266269	0.775019	0.806706	0.942033	1	544	tags=33%, list=20%, signal=41%
GOBP_REGULATION_OF_VESICLE_MEDIATED_TRANSPORT	GOBP_REGULATION_OF_VESICLE_MEDIATED_TRANSPORT		117	0.185923	0.774187	0.932302	0.942573	1	451	tags=15%, list=17%, signal=17%
GOBP_REGULATION_OF_DNA_BIOSYNTHETIC_PROCESS	GOBP_REGULATION_OF_DNA_BIOSYNTHETIC_PROCESS		19	0.241213	0.773559	0.779245	0.942754	1	543	tags=26%, list=20%, signal=33%
GOBP_GLYCOPROTEIN_BIOSYNTHETIC_PROCESS	GOBP_GLYCOPROTEIN_BIOSYNTHETIC_PROCESS		59	0.210745	0.773418	0.899209	0.942141	1	536	tags=22%, list=20%, signal=27%
GOMF_ADENYL_NUCLEOTIDE_BINDING	GOMF_ADENYL_NUCLEOTIDE_BINDING		329	0.166859	0.772149	0.990079	0.943335	1	543	tags=19%, list=20%, signal=21%
GOCC_EXOCYTIC_VESICLE	GOCC_EXOCYTIC_VESICLE		48	0.218631	0.771448	0.881764	0.943564	1	497	tags=23%, list=18%, signal=28%
GOBP_TEMPERATURE_HOMEOSTASIS	GOBP_TEMPERATURE_HOMEOSTASIS		38	0.244299	0.771094	0.871744	0.943289	1	631	tags=26%, list=23%, signal=34%
GOCC_CELL_SURFACE	GOCC_CELL_SURFACE		164	0.190926	0.770976	0.96988	0.942636	1	406	tags=15%, list=15%, signal=17%
GOBP_WOUND_HEALING	GOBP_WOUND_HEALING		132	0.19135	0.766932	0.923232	0.947995	1	455	tags=17%, list=17%, signal=19%
GOCC_RUFFLE	GOCC_RUFFLE		44	0.206849	0.765716	0.881764	0.949011	1	519	tags=20%, list=19%, signal=25%
GOBP_ACTIVATION_OF_INNATE_IMMUNE_RESPONSE	GOBP_ACTIVATION_OF_INNATE_IMMUNE_RESPONSE		28	0.221027	0.764898	0.815735	0.949444	1	294	tags=11%, list=11%, signal=12%
GOBP_INTERLEUKIN_1_MEDIATED_SIGNALING_PATHWAY	GOBP_INTERLEUKIN_1_MEDIATED_SIGNALING_PATHWAY		22	0.254604	0.761584	0.77451	0.953604	1	857	tags=45%, list=31%, signal=66%
GOBP_RESPONSE_TO_NERVE_GROWTH_FACTOR	GOBP_RESPONSE_TO_NERVE_GROWTH_FACTOR		19	0.224483	0.761524	0.805169	0.952855	1	418	tags=16%, list=15%, signal=19%
GOBP_REGULATION_OF_CELL_DIVISION	GOBP_REGULATION_OF_CELL_DIVISION		27	0.255689	0.7611	0.86722	0.952637	1	497	tags=30%, list=18%, signal=36%
GOCC_ANCHORING_JUNCTION	GOCC_ANCHORING_JUNCTION		209	0.16539	0.760557	0.954071	0.952614	1	479	tags=17%, list=18%, signal=19%
GOBP_COTRANSLATIONAL_PROTEIN_TARGETING_TO_MEMBRANE	GOBP_COTRANSLATIONAL_PROTEIN_TARGETING_TO_MEMBRANE		38	0.184924	0.760312	0.739308	0.952163	1	1104	tags=63%, list=41%, signal=105%
GOMF_VOLTAGE_GATED_POTASSIUM_CHANNEL_ACTIVITY	GOMF_VOLTAGE_GATED_POTASSIUM_CHANNEL_ACTIVITY		23	0.244979	0.759431	0.802682	0.952561	1	384	tags=13%, list=14%, signal=15%
GOMF_UBIQUITIN_LIKE_PROTEIN_LIGASE_ACTIVITY	GOMF_UBIQUITIN_LIKE_PROTEIN_LIGASE_ACTIVITY		53	0.208285	0.757961	0.865497	0.953853	1	761	tags=36%, list=28%, signal=49%
GOBP_INNATE_IMMUNE_RESPONSE	GOBP_INNATE_IMMUNE_RESPONSE		142	0.197595	0.75785	0.885214	0.95318	1	414	tags=15%, list=15%, signal=17%
GOCC_CELL_CELL_JUNCTION	GOCC_CELL_CELL_JUNCTION		113	0.181275	0.757096	0.975359	0.95347	1	368	tags=13%, list=14%, signal=15%
GOBP_AMYLOID_PRECURSOR_PROTEIN_METABOLIC_PROCESS	GOBP_AMYLOID_PRECURSOR_PROTEIN_METABOLIC_PROCESS		19	0.265295	0.755345	0.829746	0.955171	1	594	tags=32%, list=22%, signal=40%
GOMF_HISTONE_DEACETYLASE_BINDING	GOMF_HISTONE_DEACETYLASE_BINDING		25	0.243426	0.753498	0.781443	0.95692	1	3	tags=4%, list=0%, signal=4%
GOBP_GLIOGENESIS	GOBP_GLIOGENESIS		67	0.189242	0.752686	0.915152	0.957222	1	498	tags=22%, list=18%, signal=27%
GOBP_REGULATION_OF_PROTEIN_DEPHOSPHORYLATION	GOBP_REGULATION_OF_PROTEIN_DEPHOSPHORYLATION		16	0.286432	0.75264	0.794466	0.95646	1	123	tags=13%, list=5%, signal=13%
GOBP_GLYCOPROTEIN_METABOLIC_PROCESS	GOBP_GLYCOPROTEIN_METABOLIC_PROCESS		74	0.190515	0.752405	0.948104	0.955975	1	536	tags=19%, list=20%, signal=23%
GOBP_CELL_FATE_COMMITMENT	GOBP_CELL_FATE_COMMITMENT		64	0.207728	0.750327	0.929752	0.957955	1	507	tags=19%, list=19%, signal=22%
GOMF_CADHERIN_BINDING	GOMF_CADHERIN_BINDING		77	0.191245	0.750126	0.864301	0.957383	1	676	tags=26%, list=25%, signal=34%
GOBP_CARBOHYDRATE_DERIVATIVE_CATABOLIC_PROCESS	GOBP_CARBOHYDRATE_DERIVATIVE_CATABOLIC_PROCESS		45	0.219746	0.749367	0.863445	0.957606	1	425	tags=16%, list=16%, signal=18%
GOBP_FILOPODIUM_ASSEMBLY	GOBP_FILOPODIUM_ASSEMBLY		15	0.265181	0.749112	0.805221	0.957132	1	299	tags=13%, list=11%, signal=15%
GOBP_REGULATION_OF_BIOLOGICAL_PROCESS_INVOLVED_IN_SYMBIOTIC_INTERACTION	GOBP_REGULATION_OF_BIOLOGICAL_PROCESS_INVOLVED_IN_SYMBIOTIC_INTERACTION		33	0.224489	0.749037	0.801181	0.956415	1	438	tags=24%, list=16%, signal=29%
GOMF_ACTIVE_TRANSMEMBRANE_TRANSPORTER_ACTIVITY	GOMF_ACTIVE_TRANSMEMBRANE_TRANSPORTER_ACTIVITY		71	0.209019	0.74837	0.95155	0.956491	1	435	tags=17%, list=16%, signal=20%
GOBP_NEGATIVE_REGULATION_OF_SUPRAMOLECULAR_FIBER_ORGANIZATION	GOBP_NEGATIVE_REGULATION_OF_SUPRAMOLECULAR_FIBER_ORGANIZATION		32	0.217678	0.748036	0.852761	0.956116	1	483	tags=22%, list=18%, signal=26%
GOMF_PEPTIDASE_ACTIVITY	GOMF_PEPTIDASE_ACTIVITY		112	0.18923	0.747535	0.958	0.955985	1	329	tags=12%, list=12%, signal=13%
GOBP_REGULATION_OF_ACTIN_FILAMENT_BASED_PROCESS	GOBP_REGULATION_OF_ACTIN_FILAMENT_BASED_PROCESS		84	0.197453	0.74697	0.930041	0.955922	1	411	tags=15%, list=15%, signal=18%
GOCC_FIBRILLAR_CENTER	GOCC_FIBRILLAR_CENTER		24	0.231895	0.746683	0.805611	0.955467	1	691	tags=29%, list=25%, signal=39%
GOMF_GATED_CHANNEL_ACTIVITY	GOMF_GATED_CHANNEL_ACTIVITY		75	0.18887	0.746446	0.961693	0.954981	1	637	tags=24%, list=23%, signal=30%
GOCC_ATPASE_COMPLEX	GOCC_ATPASE_COMPLEX		23	0.238625	0.746411	0.837945	0.954213	1	560	tags=26%, list=21%, signal=33%
GOBP_CERAMIDE_METABOLIC_PROCESS	GOBP_CERAMIDE_METABOLIC_PROCESS		17	0.295106	0.745268	0.815416	0.954936	1	53	tags=6%, list=2%, signal=6%
GOBP_ACTIVATION_OF_IMMUNE_RESPONSE	GOBP_ACTIVATION_OF_IMMUNE_RESPONSE		82	0.190007	0.744775	0.902778	0.95476	1	543	tags=17%, list=20%, signal=21%
GOBP_STRIATED_MUSCLE_CONTRACTION	GOBP_STRIATED_MUSCLE_CONTRACTION		39	0.216098	0.742799	0.843373	0.956533	1	455	tags=18%, list=17%, signal=21%
GOBP_REGULATION_OF_RESPONSE_TO_ENDOPLASMIC_RETICULUM_STRESS	GOBP_REGULATION_OF_RESPONSE_TO_ENDOPLASMIC_RETICULUM_STRESS		19	0.233994	0.74229	0.774859	0.956383	1	513	tags=26%, list=19%, signal=32%
GOBP_RESPONSE_TO_VIRUS	GOBP_RESPONSE_TO_VIRUS		58	0.235152	0.742035	0.855513	0.955936	1	534	tags=24%, list=20%, signal=29%
GOBP_POSITIVE_REGULATION_OF_SECRETION	GOBP_POSITIVE_REGULATION_OF_SECRETION		69	0.189612	0.740975	0.925848	0.956483	1	515	tags=19%, list=19%, signal=23%
GOBP_REGULATION_OF_INNATE_IMMUNE_RESPONSE	GOBP_REGULATION_OF_INNATE_IMMUNE_RESPONSE		52	0.195712	0.740782	0.860887	0.955914	1	294	tags=10%, list=11%, signal=11%
GOMF_TETRAPYRROLE_BINDING	GOMF_TETRAPYRROLE_BINDING		26	0.24587	0.740031	0.866412	0.956062	1	474	tags=27%, list=17%, signal=32%
GOBP_MICROTUBULE_BASED_TRANSPORT	GOBP_MICROTUBULE_BASED_TRANSPORT		39	0.198463	0.73993	0.844758	0.955381	1	442	tags=21%, list=16%, signal=24%
GOBP_MUSCLE_ORGAN_MORPHOGENESIS	GOBP_MUSCLE_ORGAN_MORPHOGENESIS		19	0.258707	0.738371	0.844898	0.956676	1	9	tags=5%, list=0%, signal=5%
GOBP_REGULATION_OF_DNA_METABOLIC_PROCESS	GOBP_REGULATION_OF_DNA_METABOLIC_PROCESS		59	0.198187	0.737531	0.876247	0.956893	1	631	tags=27%, list=23%, signal=35%
GOBP_SIGNAL_RELEASE	GOBP_SIGNAL_RELEASE		106	0.170371	0.73395	0.979508	0.960519	1	144	tags=7%, list=5%, signal=7%
GOBP_REGULATION_OF_CHOLESTEROL_METABOLIC_PROCESS	GOBP_REGULATION_OF_CHOLESTEROL_METABOLIC_PROCESS		16	0.261044	0.73316	0.823529	0.960634	1	41	tags=6%, list=2%, signal=6%
GOCC_INTRINSIC_COMPONENT_OF_SYNAPTIC_MEMBRANE	GOCC_INTRINSIC_COMPONENT_OF_SYNAPTIC_MEMBRANE		43	0.205726	0.732974	0.917836	0.960054	1	0	tags=2%, list=0%, signal=2%
GOBP_NERVOUS_SYSTEM_PROCESS	GOBP_NERVOUS_SYSTEM_PROCESS		183	0.173582	0.732268	0.983158	0.960086	1	522	tags=19%, list=19%, signal=22%
GOCC_MIDBODY	GOCC_MIDBODY		31	0.216576	0.730071	0.847134	0.96193	1	167	tags=10%, list=6%, signal=10%
GOBP_EPITHELIAL_TUBE_MORPHOGENESIS	GOBP_EPITHELIAL_TUBE_MORPHOGENESIS		72	0.190718	0.729215	0.930894	0.962129	1	529	tags=19%, list=19%, signal=23%
GOBP_REGULATION_OF_PROTEIN_LOCALIZATION_TO_NUCLEUS	GOBP_REGULATION_OF_PROTEIN_LOCALIZATION_TO_NUCLEUS		31	0.215942	0.728046	0.8875	0.962669	1	697	tags=32%, list=26%, signal=43%
GOBP_CELLULAR_RESPONSE_TO_REACTIVE_OXYGEN_SPECIES	GOBP_CELLULAR_RESPONSE_TO_REACTIVE_OXYGEN_SPECIES		32	0.209946	0.727322	0.916016	0.962665	1	182	tags=9%, list=7%, signal=10%
GOBP_EAR_DEVELOPMENT	GOBP_EAR_DEVELOPMENT		43	0.215787	0.726723	0.925049	0.96253	1	703	tags=26%, list=26%, signal=34%
GOBP_POTASSIUM_ION_TRANSPORT	GOBP_POTASSIUM_ION_TRANSPORT		52	0.184872	0.726123	0.942308	0.962483	1	490	tags=17%, list=18%, signal=21%
GOBP_POSITIVE_REGULATION_OF_INTERLEUKIN_6_PRODUCTION	GOBP_POSITIVE_REGULATION_OF_INTERLEUKIN_6_PRODUCTION		21	0.241422	0.724261	0.817635	0.963889	1	406	tags=19%, list=15%, signal=22%
GOBP_NEGATIVE_REGULATION_OF_UBIQUITIN_DEPENDENT_PROTEIN_CATABOLIC_PROCESS	GOBP_NEGATIVE_REGULATION_OF_UBIQUITIN_DEPENDENT_PROTEIN_CATABOLIC_PROCESS		18	0.218675	0.722731	0.838207	0.964754	1	63	tags=6%, list=2%, signal=6%
GOBP_RESPONSE_TO_TOPOLOGICALLY_INCORRECT_PROTEIN	GOBP_RESPONSE_TO_TOPOLOGICALLY_INCORRECT_PROTEIN		39	0.191672	0.720941	0.883858	0.965919	1	513	tags=18%, list=19%, signal=22%
GOBP_MYOFIBRIL_ASSEMBLY	GOBP_MYOFIBRIL_ASSEMBLY		19	0.256197	0.719793	0.823413	0.966331	1	764	tags=37%, list=28%, signal=51%
GOBP_REGULATION_OF_BLOOD_CIRCULATION	GOBP_REGULATION_OF_BLOOD_CIRCULATION		67	0.189776	0.718623	0.960986	0.966847	1	732	tags=30%, list=27%, signal=40%
GOBP_INTERLEUKIN_6_PRODUCTION	GOBP_INTERLEUKIN_6_PRODUCTION		31	0.213457	0.718258	0.862275	0.966473	1	715	tags=23%, list=26%, signal=30%
GOBP_MESODERM_DEVELOPMENT	GOBP_MESODERM_DEVELOPMENT		25	0.228961	0.717888	0.889535	0.966049	1	333	tags=16%, list=12%, signal=18%
GOBP_ADULT_BEHAVIOR	GOBP_ADULT_BEHAVIOR		36	0.190992	0.717726	0.901575	0.965406	1	326	tags=14%, list=12%, signal=16%
GOMF_P53_BINDING	GOMF_P53_BINDING		19	0.272861	0.716488	0.839757	0.965877	1	307	tags=16%, list=11%, signal=18%
GOMF_UBIQUITIN_BINDING	GOMF_UBIQUITIN_BINDING		18	0.226527	0.716447	0.805328	0.965117	1	760	tags=33%, list=28%, signal=46%
GOBP_RESPONSE_TO_ALKALOID	GOBP_RESPONSE_TO_ALKALOID		18	0.255364	0.716086	0.855446	0.964697	1	437	tags=22%, list=16%, signal=26%
GOBP_NEURAL_TUBE_DEVELOPMENT	GOBP_NEURAL_TUBE_DEVELOPMENT		31	0.211898	0.713509	0.924797	0.96659	1	529	tags=16%, list=19%, signal=20%
GOMF_MODIFICATION_DEPENDENT_PROTEIN_BINDING	GOMF_MODIFICATION_DEPENDENT_PROTEIN_BINDING		21	0.227634	0.713023	0.848723	0.966279	1	484	tags=19%, list=18%, signal=23%
GOBP_HOMOTYPIC_CELL_CELL_ADHESION	GOBP_HOMOTYPIC_CELL_CELL_ADHESION		21	0.246751	0.711725	0.89648	0.966872	1	436	tags=29%, list=16%, signal=34%
GOBP_ANTIGEN_PROCESSING_AND_PRESENTATION_OF_PEPTIDE_ANTIGEN_VIA_MHC_CLASS_I	GOBP_ANTIGEN_PROCESSING_AND_PRESENTATION_OF_PEPTIDE_ANTIGEN_VIA_MHC_CLASS_I		19	0.25247	0.707796	0.868069	0.970112	1	762	tags=42%, list=28%, signal=58%
GOBP_ACTIN_FILAMENT_BUNDLE_ORGANIZATION	GOBP_ACTIN_FILAMENT_BUNDLE_ORGANIZATION		41	0.20776	0.707589	0.950298	0.969506	1	368	tags=15%, list=14%, signal=17%
GOBP_EMBRYONIC_SKELETAL_SYSTEM_DEVELOPMENT	GOBP_EMBRYONIC_SKELETAL_SYSTEM_DEVELOPMENT		27	0.226307	0.706504	0.862403	0.969785	1	718	tags=26%, list=26%, signal=35%
GOMF_POTASSIUM_ION_TRANSMEMBRANE_TRANSPORTER_ACTIVITY	GOMF_POTASSIUM_ION_TRANSMEMBRANE_TRANSPORTER_ACTIVITY		38	0.211963	0.705601	0.926441	0.969923	1	384	tags=16%, list=14%, signal=18%
GOBP_SPHINGOLIPID_BIOSYNTHETIC_PROCESS	GOBP_SPHINGOLIPID_BIOSYNTHETIC_PROCESS		16	0.291298	0.703996	0.868369	0.970664	1	53	tags=6%, list=2%, signal=6%
GOCC_ACTIN_FILAMENT_BUNDLE	GOCC_ACTIN_FILAMENT_BUNDLE		21	0.236125	0.702609	0.864301	0.971204	1	627	tags=29%, list=23%, signal=37%
GOBP_TOLL_LIKE_RECEPTOR_SIGNALING_PATHWAY	GOBP_TOLL_LIKE_RECEPTOR_SIGNALING_PATHWAY		35	0.224875	0.700685	0.914894	0.972265	1	330	tags=14%, list=12%, signal=16%
GOBP_GLYCOSPHINGOLIPID_METABOLIC_PROCESS	GOBP_GLYCOSPHINGOLIPID_METABOLIC_PROCESS		15	0.28645	0.700596	0.900196	0.971537	1	53	tags=7%, list=2%, signal=7%
GOBP_REGULATION_OF_PROTEIN_DEPOLYMERIZATION	GOBP_REGULATION_OF_PROTEIN_DEPOLYMERIZATION		24	0.231768	0.700025	0.894523	0.971306	1	698	tags=38%, list=26%, signal=50%
GOMF_EXOGENOUS_PROTEIN_BINDING	GOMF_EXOGENOUS_PROTEIN_BINDING		18	0.25668	0.699309	0.918327	0.971162	1	437	tags=22%, list=16%, signal=26%
GOBP_NEGATIVE_REGULATION_OF_TRANSMEMBRANE_TRANSPORT	GOBP_NEGATIVE_REGULATION_OF_TRANSMEMBRANE_TRANSPORT		15	0.242129	0.69843	0.848671	0.971161	1	724	tags=27%, list=27%, signal=36%
GOMF_ANTIPORTER_ACTIVITY	GOMF_ANTIPORTER_ACTIVITY		17	0.26155	0.691831	0.872117	0.976387	1	815	tags=35%, list=30%, signal=50%
GOBP_TUBE_FORMATION	GOBP_TUBE_FORMATION		28	0.22511	0.68752	0.944444	0.979366	1	584	tags=21%, list=21%, signal=27%
GOBP_REGULATION_OF_DEFENSE_RESPONSE	GOBP_REGULATION_OF_DEFENSE_RESPONSE		110	0.169821	0.686877	0.969008	0.979132	1	328	tags=10%, list=12%, signal=11%
GOBP_NEGATIVE_REGULATION_OF_WNT_SIGNALING_PATHWAY	GOBP_NEGATIVE_REGULATION_OF_WNT_SIGNALING_PATHWAY		41	0.199603	0.682602	0.915638	0.981824	1	209	tags=7%, list=8%, signal=8%
GOBP_POSITIVE_REGULATION_OF_NOTCH_SIGNALING_PATHWAY	GOBP_POSITIVE_REGULATION_OF_NOTCH_SIGNALING_PATHWAY		15	0.249225	0.681397	0.87574	0.981993	1	363	tags=20%, list=13%, signal=23%
GOBP_CARDIAC_MUSCLE_CONTRACTION	GOBP_CARDIAC_MUSCLE_CONTRACTION		31	0.214783	0.68121	0.91	0.981335	1	455	tags=19%, list=17%, signal=23%
GOBP_CELL_DIVISION	GOBP_CELL_DIVISION		111	0.173095	0.681148	0.978903	0.980584	1	757	tags=33%, list=28%, signal=44%
GOBP_ENSHEATHMENT_OF_NEURONS	GOBP_ENSHEATHMENT_OF_NEURONS		33	0.212151	0.679712	0.950593	0.980893	1	474	tags=24%, list=17%, signal=29%
GOBP_REGULATION_OF_DNA_REPLICATION	GOBP_REGULATION_OF_DNA_REPLICATION		18	0.22628	0.678432	0.893411	0.981131	1	757	tags=39%, list=28%, signal=53%
GOMF_POTASSIUM_CHANNEL_ACTIVITY	GOMF_POTASSIUM_CHANNEL_ACTIVITY		29	0.20952	0.676923	0.911765	0.981569	1	490	tags=17%, list=18%, signal=21%
GOBP_NEURAL_PRECURSOR_CELL_PROLIFERATION	GOBP_NEURAL_PRECURSOR_CELL_PROLIFERATION		32	0.219694	0.676735	0.941532	0.980914	1	521	tags=25%, list=19%, signal=31%
GOBP_INTEGRIN_MEDIATED_SIGNALING_PATHWAY	GOBP_INTEGRIN_MEDIATED_SIGNALING_PATHWAY		26	0.23996	0.674749	0.962801	0.981628	1	330	tags=19%, list=12%, signal=22%
GOBP_ODONTOGENESIS_OF_DENTIN_CONTAINING_TOOTH	GOBP_ODONTOGENESIS_OF_DENTIN_CONTAINING_TOOTH		19	0.217135	0.674372	0.871429	0.981142	1	56	tags=5%, list=2%, signal=5%
GOBP_REGULATION_OF_PATTERN_RECOGNITION_RECEPTOR_SIGNALING_PATHWAY	GOBP_REGULATION_OF_PATTERN_RECOGNITION_RECEPTOR_SIGNALING_PATHWAY		19	0.247264	0.67283	0.926441	0.981447	1	750	tags=32%, list=28%, signal=43%
GOBP_REGULATION_OF_ANIMAL_ORGAN_MORPHOGENESIS	GOBP_REGULATION_OF_ANIMAL_ORGAN_MORPHOGENESIS		35	0.211056	0.672026	0.969136	0.981226	1	642	tags=26%, list=24%, signal=33%
GOCC_SPECIFIC_GRANULE_MEMBRANE	GOCC_SPECIFIC_GRANULE_MEMBRANE		18	0.232938	0.671938	0.890335	0.980483	1	580	tags=28%, list=21%, signal=35%
GOBP_NEUROMUSCULAR_PROCESS	GOBP_NEUROMUSCULAR_PROCESS		15	0.235289	0.660611	0.883065	0.987763	1	804	tags=33%, list=30%, signal=47%
GOBP_I_KAPPAB_KINASE_NF_KAPPAB_SIGNALING	GOBP_I_KAPPAB_KINASE_NF_KAPPAB_SIGNALING		52	0.173617	0.658986	0.94605	0.988095	1	768	tags=37%, list=28%, signal=50%
GOCC_RECEPTOR_COMPLEX	GOCC_RECEPTOR_COMPLEX		106	0.174893	0.658597	0.996078	0.98757	1	342	tags=12%, list=13%, signal=13%
GOBP_POSITIVE_REGULATION_OF_DEFENSE_RESPONSE	GOBP_POSITIVE_REGULATION_OF_DEFENSE_RESPONSE		61	0.174475	0.658087	0.953722	0.987085	1	381	tags=11%, list=14%, signal=13%
GOBP_GLIAL_CELL_DEVELOPMENT	GOBP_GLIAL_CELL_DEVELOPMENT		28	0.20931	0.653406	0.961693	0.989308	1	491	tags=25%, list=18%, signal=30%
GOBP_NEGATIVE_REGULATION_OF_PROTEOLYSIS_INVOLVED_IN_CELLULAR_PROTEIN_CATABOLIC_PROCESS	GOBP_NEGATIVE_REGULATION_OF_PROTEOLYSIS_INVOLVED_IN_CELLULAR_PROTEIN_CATABOLIC_PROCESS		22	0.181308	0.652747	0.9	0.98894	1	63	tags=5%, list=2%, signal=5%
GOBP_NEGATIVE_REGULATION_OF_CELLULAR_PROTEIN_CATABOLIC_PROCESS	GOBP_NEGATIVE_REGULATION_OF_CELLULAR_PROTEIN_CATABOLIC_PROCESS		22	0.181308	0.652747	0.9	0.98814	1	63	tags=5%, list=2%, signal=5%
GOBP_RESPONSE_TO_REACTIVE_OXYGEN_SPECIES	GOBP_RESPONSE_TO_REACTIVE_OXYGEN_SPECIES		43	0.172271	0.648138	0.978431	0.990053	1	519	tags=16%, list=19%, signal=20%
GOBP_REGULATION_OF_CALCIUM_ION_TRANSMEMBRANE_TRANSPORT	GOBP_REGULATION_OF_CALCIUM_ION_TRANSMEMBRANE_TRANSPORT		22	0.200564	0.645822	0.952183	0.990647	1	426	tags=18%, list=16%, signal=21%
GOBP_NUCLEOSIDE_BISPHOSPHATE_METABOLIC_PROCESS	GOBP_NUCLEOSIDE_BISPHOSPHATE_METABOLIC_PROCESS		21	0.251007	0.645201	0.944338	0.990234	1	17	tags=5%, list=1%, signal=5%
GOBP_REGULATION_OF_SODIUM_ION_TRANSMEMBRANE_TRANSPORT	GOBP_REGULATION_OF_SODIUM_ION_TRANSMEMBRANE_TRANSPORT		17	0.213925	0.645196	0.924644	0.989438	1	724	tags=41%, list=27%, signal=56%
GOCC_CATION_CHANNEL_COMPLEX	GOCC_CATION_CHANNEL_COMPLEX		52	0.169655	0.643069	0.97012	0.989923	1	384	tags=13%, list=14%, signal=15%
GOBP_REGULATION_OF_POTASSIUM_ION_TRANSPORT	GOBP_REGULATION_OF_POTASSIUM_ION_TRANSPORT		18	0.192981	0.641793	0.923541	0.989866	1	437	tags=17%, list=16%, signal=20%
GOBP_REGULATION_OF_CELL_KILLING	GOBP_REGULATION_OF_CELL_KILLING		16	0.22659	0.641658	0.914563	0.989129	1	731	tags=31%, list=27%, signal=42%
GOBP_APPENDAGE_DEVELOPMENT	GOBP_APPENDAGE_DEVELOPMENT		40	0.191931	0.641306	0.963783	0.988521	1	311	tags=13%, list=11%, signal=14%
GOBP_ADULT_LOCOMOTORY_BEHAVIOR	GOBP_ADULT_LOCOMOTORY_BEHAVIOR		19	0.202181	0.640845	0.933723	0.987953	1	724	tags=26%, list=27%, signal=36%
GOMF_UBIQUITIN_LIKE_PROTEIN_BINDING	GOMF_UBIQUITIN_LIKE_PROTEIN_BINDING		22	0.190633	0.637894	0.892857	0.988687	1	821	tags=36%, list=30%, signal=52%
GOBP_REGULATION_OF_HEART_CONTRACTION	GOBP_REGULATION_OF_HEART_CONTRACTION		54	0.167865	0.637709	0.979253	0.987986	1	732	tags=28%, list=27%, signal=37%
GOCC_CENTRIOLE	GOCC_CENTRIOLE		17	0.221522	0.632902	0.926978	0.989737	1	434	tags=18%, list=16%, signal=21%
GOBP_REGULATION_OF_SYSTEMIC_ARTERIAL_BLOOD_PRESSURE	GOBP_REGULATION_OF_SYSTEMIC_ARTERIAL_BLOOD_PRESSURE		18	0.236271	0.630218	0.975952	0.990267	1	518	tags=28%, list=19%, signal=34%
GOBP_KIDNEY_MORPHOGENESIS	GOBP_KIDNEY_MORPHOGENESIS		17	0.230435	0.628562	0.962151	0.990376	1	645	tags=35%, list=24%, signal=46%
GOBP_SIGNAL_TRANSDUCTION_IN_ABSENCE_OF_LIGAND	GOBP_SIGNAL_TRANSDUCTION_IN_ABSENCE_OF_LIGAND		19	0.208906	0.627508	0.922594	0.990074	1	292	tags=16%, list=11%, signal=18%
GOBP_REGULATION_OF_RESPONSE_TO_WOUNDING	GOBP_REGULATION_OF_RESPONSE_TO_WOUNDING		36	0.184544	0.623961	0.983673	0.990914	1	616	tags=25%, list=23%, signal=32%
GOCC_SCHAFFER_COLLATERAL_CA1_SYNAPSE	GOCC_SCHAFFER_COLLATERAL_CA1_SYNAPSE		22	0.201596	0.623668	0.976695	0.990273	1	588	tags=27%, list=22%, signal=34%
GOBP_SUBSTRATE_ADHESION_DEPENDENT_CELL_SPREADING	GOBP_SUBSTRATE_ADHESION_DEPENDENT_CELL_SPREADING		28	0.204775	0.622174	0.957404	0.990152	1	350	tags=18%, list=13%, signal=20%
GOCC_RUFFLE_MEMBRANE	GOCC_RUFFLE_MEMBRANE		25	0.193311	0.622135	0.960239	0.989384	1	606	tags=24%, list=22%, signal=31%
GOMF_PEPTIDE_BINDING	GOMF_PEPTIDE_BINDING		60	0.170305	0.619443	0.98855	0.989764	1	422	tags=17%, list=15%, signal=19%
GOBP_REGULATION_OF_CYTOSOLIC_CALCIUM_ION_CONCENTRATION	GOBP_REGULATION_OF_CYTOSOLIC_CALCIUM_ION_CONCENTRATION		55	0.158603	0.617135	0.988212	0.989924	1	842	tags=33%, list=31%, signal=46%
GOBP_EMBRYONIC_HEART_TUBE_DEVELOPMENT	GOBP_EMBRYONIC_HEART_TUBE_DEVELOPMENT		15	0.220984	0.613453	0.946939	0.990742	1	455	tags=20%, list=17%, signal=24%
GOBP_POSITIVE_REGULATION_OF_CATION_TRANSMEMBRANE_TRANSPORT	GOBP_POSITIVE_REGULATION_OF_CATION_TRANSMEMBRANE_TRANSPORT		24	0.186102	0.601362	0.971311	0.994615	1	426	tags=17%, list=16%, signal=20%
GOCC_SYNAPTIC_MEMBRANE	GOCC_SYNAPTIC_MEMBRANE		103	0.151279	0.597246	0.995859	0.995351	1	544	tags=16%, list=20%, signal=19%
GOBP_SPINDLE_ASSEMBLY	GOBP_SPINDLE_ASSEMBLY		19	0.217275	0.595927	0.97166	0.994987	1	690	tags=37%, list=25%, signal=49%
GOBP_EAR_MORPHOGENESIS	GOBP_EAR_MORPHOGENESIS		22	0.217574	0.593981	0.969754	0.994814	1	522	tags=23%, list=19%, signal=28%
GOBP_T_CELL_DIFFERENTIATION_IN_THYMUS	GOBP_T_CELL_DIFFERENTIATION_IN_THYMUS		22	0.190728	0.591563	0.961924	0.994805	1	679	tags=27%, list=25%, signal=36%
GOBP_PATTERN_RECOGNITION_RECEPTOR_SIGNALING_PATHWAY	GOBP_PATTERN_RECOGNITION_RECEPTOR_SIGNALING_PATHWAY		42	0.177801	0.586879	0.988281	0.995498	1	330	tags=12%, list=12%, signal=13%
GOBP_LIPOPROTEIN_BIOSYNTHETIC_PROCESS	GOBP_LIPOPROTEIN_BIOSYNTHETIC_PROCESS		16	0.222461	0.586684	0.962185	0.994764	1	596	tags=31%, list=22%, signal=40%
GOBP_ADENYLATE_CYCLASE_MODULATING_G_PROTEIN_COUPLED_RECEPTOR_SIGNALING_PATHWAY	GOBP_ADENYLATE_CYCLASE_MODULATING_G_PROTEIN_COUPLED_RECEPTOR_SIGNALING_PATHWAY		30	0.1771	0.580899	0.996063	0.995709	1	411	tags=17%, list=15%, signal=19%
GOBP_RECEPTOR_MEDIATED_ENDOCYTOSIS	GOBP_RECEPTOR_MEDIATED_ENDOCYTOSIS		54	0.160006	0.579751	0.994036	0.995286	1	545	tags=19%, list=20%, signal=23%
GOBP_SPHINGOLIPID_METABOLIC_PROCESS	GOBP_SPHINGOLIPID_METABOLIC_PROCESS		24	0.211283	0.574109	0.974257	0.996023	1	53	tags=4%, list=2%, signal=4%
GOMF_AMYLOID_BETA_BINDING	GOMF_AMYLOID_BETA_BINDING		23	0.182911	0.563222	0.966535	0.99787	1	342	tags=13%, list=13%, signal=15%
GOBP_PROTEIN_K48_LINKED_UBIQUITINATION	GOBP_PROTEIN_K48_LINKED_UBIQUITINATION		18	0.170595	0.562115	0.977055	0.997331	1	471	tags=17%, list=17%, signal=20%
GOBP_CARDIAC_MUSCLE_CELL_ACTION_POTENTIAL	GOBP_CARDIAC_MUSCLE_CELL_ACTION_POTENTIAL		22	0.189789	0.556347	0.987654	0.997787	1	868	tags=41%, list=32%, signal=60%
GOBP_CYTOKINESIS	GOBP_CYTOKINESIS		30	0.171986	0.541483	0.983193	0.999843	1	497	tags=23%, list=18%, signal=28%
GOBP_INNER_EAR_MORPHOGENESIS	GOBP_INNER_EAR_MORPHOGENESIS		18	0.209216	0.539247	0.99044	0.999436	1	522	tags=22%, list=19%, signal=27%
GOBP_REGULATION_OF_CALCIUM_ION_TRANSPORT_INTO_CYTOSOL	GOBP_REGULATION_OF_CALCIUM_ION_TRANSPORT_INTO_CYTOSOL		15	0.185825	0.537257	0.988142	0.999003	1	426	tags=20%, list=16%, signal=24%
GOBP_NEUTRAL_LIPID_METABOLIC_PROCESS	GOBP_NEUTRAL_LIPID_METABOLIC_PROCESS		22	0.174642	0.528533	0.987805	0.999562	1	801	tags=36%, list=29%, signal=51%
GOBP_INTERFERON_GAMMA_PRODUCTION	GOBP_INTERFERON_GAMMA_PRODUCTION		20	0.192291	0.515623	0.990234	1	1	639	tags=20%, list=23%, signal=26%
GOBP_REGULATION_OF_PHOSPHOLIPASE_ACTIVITY	GOBP_REGULATION_OF_PHOSPHOLIPASE_ACTIVITY		19	0.174342	0.513549	0.997886	1	1	93	tags=5%, list=3%, signal=5%
GOCC_CLATHRIN_COATED_VESICLE	GOCC_CLATHRIN_COATED_VESICLE		38	0.148328	0.510457	0.987629	0.999607	1	517	tags=21%, list=19%, signal=26%
GOMF_DNA_BINDING_TRANSCRIPTION_REPRESSOR_ACTIVITY	GOMF_DNA_BINDING_TRANSCRIPTION_REPRESSOR_ACTIVITY		76	0.138769	0.509516	1	0.998934	1	716	tags=25%, list=26%, signal=33%
GOMF_GUANYL_NUCLEOTIDE_EXCHANGE_FACTOR_ACTIVITY	GOMF_GUANYL_NUCLEOTIDE_EXCHANGE_FACTOR_ACTIVITY		37	0.137267	0.502564	1	0.998874	1	692	tags=24%, list=25%, signal=32%
GOBP_POSITIVE_REGULATION_OF_INSULIN_SECRETION	GOBP_POSITIVE_REGULATION_OF_INSULIN_SECRETION		16	0.174298	0.48114	0.99389	0.99988	1	2251	tags=100%, list=83%, signal=573%
GOBP_VESICLE_TARGETING	GOBP_VESICLE_TARGETING		22	0.151519	0.480656	0.984032	0.999129	1	690	tags=23%, list=25%, signal=30%
GOMF_PROTEIN_C_TERMINUS_BINDING	GOMF_PROTEIN_C_TERMINUS_BINDING		41	0.130167	0.448005	1	1	1	850	tags=27%, list=31%, signal=38%
GOBP_MACROPHAGE_ACTIVATION	GOBP_MACROPHAGE_ACTIVATION		22	0.14992	0.430329	1	0.999867	1	715	tags=23%, list=26%, signal=31%
GOBP_POSITIVE_REGULATION_OF_JUN_KINASE_ACTIVITY	GOBP_POSITIVE_REGULATION_OF_JUN_KINASE_ACTIVITY		23	0.131857	0.406754	1	0.999545	1	1035	tags=52%, list=38%, signal=83%
