# Supplementary material for: Identification of mitochondria-related hub genes in sarcopenia and functional regulation of MFG-E8 on ROS-mediated mitochondrial dysfunction and cell cycle arrest
Source: Royal Society of Chemistry journal article supplement (doi:10.1039/d1fo02610k), 2021-12-01
Supplement: d1fo02610k3.xlsx [file d1fo02610k3.xlsx]

## Sheet: Sheet1
NAME	GS<br> follow link to MSigDB	GS DETAILS	SIZE	ES	NES	NOM p-val	FDR q-val	FWER p-val	RANK AT MAX	LEADING EDGE
KEGG_SPLICEOSOME	KEGG_SPLICEOSOME	Details ...	22	0.536176	1.74327	0.010142	0.0672668	0.144	792	tags=68%, list=29%, signal=95%
KEGG_LYSOSOME	KEGG_LYSOSOME	Details ...	25	0.471283	1.46925	0.053719	0.335013	0.684	395	tags=28%, list=15%, signal=32%
KEGG_ADHERENS_JUNCTION	KEGG_ADHERENS_JUNCTION	Details ...	25	0.366697	1.22566	0.203782	0.435234	0.967	294	tags=20%, list=11%, signal=22%
KEGG_RIBOSOME	KEGG_RIBOSOME	Details ...	32	0.36035	1.23929	0.21627	0.487501	0.962	1104	tags=69%, list=41%, signal=114%
KEGG_TIGHT_JUNCTION	KEGG_TIGHT_JUNCTION	Details ...	42	0.332032	1.15813	0.247934	0.499323	0.989	396	tags=24%, list=15%, signal=27%
KEGG_VIRAL_MYOCARDITIS	KEGG_VIRAL_MYOCARDITIS	Details ...	16	0.516785	1.30518	0.145161	0.58612	0.927	330	tags=38%, list=12%, signal=42%
KEGG_TGF_BETA_SIGNALING_PATHWAY	KEGG_TGF_BETA_SIGNALING_PATHWAY	Details ...	25	0.425104	1.24418	0.183505	0.593967	0.962	376	tags=32%, list=14%, signal=37%
KEGG_UBIQUITIN_MEDIATED_PROTEOLYSIS	KEGG_UBIQUITIN_MEDIATED_PROTEOLYSIS	Details ...	41	0.245254	0.980118	0.496994	0.764	0.999	533	tags=17%, list=20%, signal=21%
KEGG_REGULATION_OF_ACTIN_CYTOSKELETON	KEGG_REGULATION_OF_ACTIN_CYTOSKELETON	Details ...	56	0.277247	0.98631	0.5	0.842198	0.999	365	tags=23%, list=13%, signal=26%
KEGG_WNT_SIGNALING_PATHWAY	KEGG_WNT_SIGNALING_PATHWAY	Details ...	44	0.203049	0.714946	0.887324	0.870543	1	416	tags=16%, list=15%, signal=18%
KEGG_CYTOKINE_CYTOKINE_RECEPTOR_INTERACTION	KEGG_CYTOKINE_CYTOKINE_RECEPTOR_INTERACTION	Details ...	38	0.25574	0.868195	0.721443	0.874947	1	311	tags=18%, list=11%, signal=21%
KEGG_NEUROACTIVE_LIGAND_RECEPTOR_INTERACTION	KEGG_NEUROACTIVE_LIGAND_RECEPTOR_INTERACTION	Details ...	46	0.222399	0.72623	0.933078	0.918008	1	559	tags=24%, list=21%, signal=30%
KEGG_CELL_ADHESION_MOLECULES_CAMS	KEGG_CELL_ADHESION_MOLECULES_CAMS	Details ...	30	0.289007	0.873659	0.650099	0.948508	1	753	tags=33%, list=28%, signal=46%
KEGG_ARRHYTHMOGENIC_RIGHT_VENTRICULAR_CARDIOMYOPATHY_ARVC	KEGG_ARRHYTHMOGENIC_RIGHT_VENTRICULAR_CARDIOMYOPATHY_ARVC	Details ...	24	0.257517	0.791248	0.803536	0.958253	1	299	tags=21%, list=11%, signal=23%
KEGG_LEUKOCYTE_TRANSENDOTHELIAL_MIGRATION	KEGG_LEUKOCYTE_TRANSENDOTHELIAL_MIGRATION	Details ...	30	0.250322	0.739496	0.881874	0.969955	1	610	tags=40%, list=22%, signal=51%
