# Supplementary material for: Identification of mitochondria-related hub genes in sarcopenia and functional regulation of MFG-E8 on ROS-mediated mitochondrial dysfunction and cell cycle arrest
Source: Royal Society of Chemistry journal article supplement (doi:10.1039/d1fo02610k), 2021-12-01
Supplement: d1fo02610k4.xlsx [file d1fo02610k4.xlsx]

## Sheet: Sheet1
NAME	GS<br> follow link to MSigDB	GS DETAILS	SIZE	ES	NES	NOM p-val	FDR q-val	FWER p-val	RANK AT MAX	LEADING EDGE
KEGG_PARKINSONS_DISEASE	KEGG_PARKINSONS_DISEASE	Details ...	24	-0.686808	-2.23262	0	0	0	540	tags=58%, list=20%, signal=72%
KEGG_OXIDATIVE_PHOSPHORYLATION	KEGG_OXIDATIVE_PHOSPHORYLATION	Details ...	22	-0.696038	-2.01718	0	0.00787211	0.01	540	tags=73%, list=20%, signal=90%
KEGG_ALZHEIMERS_DISEASE	KEGG_ALZHEIMERS_DISEASE	Details ...	43	-0.465898	-1.90054	0.00198413	0.0225091	0.039	692	tags=49%, list=25%, signal=64%
KEGG_TYPE_II_DIABETES_MELLITUS	KEGG_TYPE_II_DIABETES_MELLITUS	Details ...	16	-0.61017	-1.6103	0.0121951	0.254245	0.404	24	tags=19%, list=1%, signal=19%
KEGG_HUNTINGTONS_DISEASE	KEGG_HUNTINGTONS_DISEASE	Details ...	38	-0.434577	-1.55636	0.0272537	0.303716	0.527	540	tags=47%, list=20%, signal=58%
KEGG_ADIPOCYTOKINE_SIGNALING_PATHWAY	KEGG_ADIPOCYTOKINE_SIGNALING_PATHWAY	Details ...	19	-0.550482	-1.49592	0.0471311	0.390791	0.663	450	tags=37%, list=17%, signal=44%
KEGG_PROGESTERONE_MEDIATED_OOCYTE_MATURATION	KEGG_PROGESTERONE_MEDIATED_OOCYTE_MATURATION	Details ...	24	-0.439698	-1.33052	0.0987903	0.450022	0.914	755	tags=46%, list=28%, signal=63%
KEGG_GLIOMA	KEGG_GLIOMA	Details ...	21	-0.483052	-1.44686	0.0623701	0.462212	0.762	791	tags=48%, list=29%, signal=67%
KEGG_PEROXISOME	KEGG_PEROXISOME	Details ...	16	-0.518278	-1.29459	0.164882	0.471835	0.942	301	tags=25%, list=11%, signal=28%
KEGG_FC_EPSILON_RI_SIGNALING_PATHWAY	KEGG_FC_EPSILON_RI_SIGNALING_PATHWAY	Details ...	21	-0.429118	-1.33416	0.130081	0.474508	0.909	785	tags=43%, list=29%, signal=60%
KEGG_COLORECTAL_CANCER	KEGG_COLORECTAL_CANCER	Details ...	18	-0.466975	-1.36336	0.114053	0.474747	0.881	282	tags=22%, list=10%, signal=25%
KEGG_ENDOMETRIAL_CANCER	KEGG_ENDOMETRIAL_CANCER	Details ...	19	-0.435814	-1.30005	0.146091	0.490216	0.938	748	tags=42%, list=27%, signal=58%
KEGG_INSULIN_SIGNALING_PATHWAY	KEGG_INSULIN_SIGNALING_PATHWAY	Details ...	46	-0.442007	-1.39089	0.0890269	0.495798	0.836	694	tags=48%, list=25%, signal=63%
KEGG_EPITHELIAL_CELL_SIGNALING_IN_HELICOBACTER_PYLORI_INFECTION	KEGG_EPITHELIAL_CELL_SIGNALING_IN_HELICOBACTER_PYLORI_INFECTION	Details ...	16	-0.451895	-1.34058	0.107884	0.49796	0.901	601	tags=44%, list=22%, signal=56%
KEGG_LONG_TERM_DEPRESSION	KEGG_LONG_TERM_DEPRESSION	Details ...	20	-0.409782	-1.36382	0.127202	0.520367	0.88	409	tags=25%, list=15%, signal=29%
KEGG_MELANOGENESIS	KEGG_MELANOGENESIS	Details ...	28	-0.340009	-1.11203	0.290258	0.549327	0.996	359	tags=25%, list=13%, signal=28%
KEGG_CHEMOKINE_SIGNALING_PATHWAY	KEGG_CHEMOKINE_SIGNALING_PATHWAY	Details ...	36	-0.328383	-1.11978	0.281553	0.549834	0.996	694	tags=39%, list=25%, signal=51%
KEGG_MAPK_SIGNALING_PATHWAY	KEGG_MAPK_SIGNALING_PATHWAY	Details ...	68	-0.350588	-1.39225	0.0572597	0.554643	0.835	838	tags=51%, list=31%, signal=72%
KEGG_APOPTOSIS	KEGG_APOPTOSIS	Details ...	21	-0.345698	-1.11991	0.279923	0.567992	0.996	51	tags=10%, list=2%, signal=10%
KEGG_MELANOMA	KEGG_MELANOMA	Details ...	23	-0.377982	-1.12682	0.261411	0.571157	0.996	180	tags=17%, list=7%, signal=18%
KEGG_VIBRIO_CHOLERAE_INFECTION	KEGG_VIBRIO_CHOLERAE_INFECTION	Details ...	16	-0.454983	-1.2428	0.216102	0.57388	0.973	504	tags=38%, list=19%, signal=46%
KEGG_RENAL_CELL_CARCINOMA	KEGG_RENAL_CELL_CARCINOMA	Details ...	22	-0.372982	-1.06138	0.356164	0.579923	0.998	928	tags=55%, list=34%, signal=82%
KEGG_NON_SMALL_CELL_LUNG_CANCER	KEGG_NON_SMALL_CELL_LUNG_CANCER	Details ...	19	-0.346156	-1.06686	0.370902	0.583162	0.998	791	tags=42%, list=29%, signal=59%
KEGG_FOCAL_ADHESION	KEGG_FOCAL_ADHESION	Details ...	66	-0.292912	-1.07413	0.327485	0.583605	0.998	440	tags=24%, list=16%, signal=28%
KEGG_PURINE_METABOLISM	KEGG_PURINE_METABOLISM	Details ...	34	-0.346568	-1.19523	0.21135	0.58392	0.99	631	tags=38%, list=23%, signal=49%
KEGG_HYPERTROPHIC_CARDIOMYOPATHY_HCM	KEGG_HYPERTROPHIC_CARDIOMYOPATHY_HCM	Details ...	30	-0.386591	-1.12895	0.277083	0.586525	0.996	520	tags=37%, list=19%, signal=45%
KEGG_FC_GAMMA_R_MEDIATED_PHAGOCYTOSIS	KEGG_FC_GAMMA_R_MEDIATED_PHAGOCYTOSIS	Details ...	25	-0.349372	-1.07603	0.34638	0.596645	0.998	402	tags=20%, list=15%, signal=23%
KEGG_GLYCEROPHOSPHOLIPID_METABOLISM	KEGG_GLYCEROPHOSPHOLIPID_METABOLISM	Details ...	17	-0.385744	-1.18039	0.243665	0.597247	0.992	574	tags=29%, list=21%, signal=37%
KEGG_NEUROTROPHIN_SIGNALING_PATHWAY	KEGG_NEUROTROPHIN_SIGNALING_PATHWAY	Details ...	43	-0.346033	-1.22265	0.175153	0.599363	0.981	755	tags=47%, list=28%, signal=63%
KEGG_DILATED_CARDIOMYOPATHY	KEGG_DILATED_CARDIOMYOPATHY	Details ...	29	-0.32819	-1.08228	0.335341	0.600327	0.998	520	tags=38%, list=19%, signal=46%
KEGG_ERBB_SIGNALING_PATHWAY	KEGG_ERBB_SIGNALING_PATHWAY	Details ...	36	-0.307043	-1.0431	0.389344	0.602063	0.998	791	tags=44%, list=29%, signal=62%
KEGG_CARDIAC_MUSCLE_CONTRACTION	KEGG_CARDIAC_MUSCLE_CONTRACTION	Details ...	20	-0.352591	-1.1298	0.292434	0.606263	0.996	737	tags=55%, list=27%, signal=75%
KEGG_PATHWAYS_IN_CANCER	KEGG_PATHWAYS_IN_CANCER	Details ...	94	-0.276097	-1.13843	0.198381	0.607513	0.996	321	tags=17%, list=12%, signal=19%
KEGG_GNRH_SIGNALING_PATHWAY	KEGG_GNRH_SIGNALING_PATHWAY	Details ...	27	-0.327943	-1.15557	0.264766	0.610069	0.995	881	tags=44%, list=32%, signal=65%
KEGG_HEMATOPOIETIC_CELL_LINEAGE	KEGG_HEMATOPOIETIC_CELL_LINEAGE	Details ...	16	-0.463806	-1.19635	0.247465	0.61012	0.989	393	tags=25%, list=14%, signal=29%
KEGG_LONG_TERM_POTENTIATION	KEGG_LONG_TERM_POTENTIATION	Details ...	21	-0.279102	-1.0289	0.39596	0.618895	0.999	791	tags=52%, list=29%, signal=73%
KEGG_OOCYTE_MEIOSIS	KEGG_OOCYTE_MEIOSIS	Details ...	26	-0.358707	-1.16178	0.270161	0.620294	0.994	684	tags=42%, list=25%, signal=56%
KEGG_JAK_STAT_SIGNALING_PATHWAY	KEGG_JAK_STAT_SIGNALING_PATHWAY	Details ...	37	-0.354355	-1.14182	0.23913	0.622046	0.996	34	tags=11%, list=1%, signal=11%
KEGG_MTOR_SIGNALING_PATHWAY	KEGG_MTOR_SIGNALING_PATHWAY	Details ...	16	-0.459308	-1.20195	0.25	0.626946	0.987	203	tags=19%, list=7%, signal=20%
KEGG_AXON_GUIDANCE	KEGG_AXON_GUIDANCE	Details ...	38	-0.287081	-0.980027	0.507407	0.650515	0.999	894	tags=61%, list=33%, signal=89%
KEGG_ACUTE_MYELOID_LEUKEMIA	KEGG_ACUTE_MYELOID_LEUKEMIA	Details ...	16	-0.351758	-0.98324	0.50501	0.658978	0.999	748	tags=44%, list=27%, signal=60%
KEGG_CELL_CYCLE	KEGG_CELL_CYCLE	Details ...	26	-0.307574	-0.984292	0.473477	0.672064	0.999	342	tags=23%, list=13%, signal=26%
KEGG_VEGF_SIGNALING_PATHWAY	KEGG_VEGF_SIGNALING_PATHWAY	Details ...	18	-0.321008	-0.958805	0.536346	0.682894	1	877	tags=56%, list=32%, signal=81%
KEGG_TOLL_LIKE_RECEPTOR_SIGNALING_PATHWAY	KEGG_TOLL_LIKE_RECEPTOR_SIGNALING_PATHWAY	Details ...	23	-0.333104	-0.991814	0.491018	0.686222	0.999	34	tags=9%, list=1%, signal=9%
KEGG_PANCREATIC_CANCER	KEGG_PANCREATIC_CANCER	Details ...	24	-0.310921	-0.985236	0.458333	0.68628	0.999	820	tags=38%, list=30%, signal=53%
KEGG_BASAL_CELL_CARCINOMA	KEGG_BASAL_CELL_CARCINOMA	Details ...	15	-0.360689	-0.925451	0.541752	0.724233	1	282	tags=20%, list=10%, signal=22%
KEGG_PYRIMIDINE_METABOLISM	KEGG_PYRIMIDINE_METABOLISM	Details ...	15	-0.321077	-0.929258	0.600386	0.731797	1	631	tags=40%, list=23%, signal=52%
KEGG_CALCIUM_SIGNALING_PATHWAY	KEGG_CALCIUM_SIGNALING_PATHWAY	Details ...	49	-0.234289	-0.882891	0.704365	0.801241	1	806	tags=33%, list=30%, signal=46%
KEGG_ENDOCYTOSIS	KEGG_ENDOCYTOSIS	Details ...	44	-0.231116	-0.873034	0.681542	0.806654	1	340	tags=16%, list=12%, signal=18%
KEGG_ECM_RECEPTOR_INTERACTION	KEGG_ECM_RECEPTOR_INTERACTION	Details ...	22	-0.320035	-0.854536	0.713996	0.829301	1	393	tags=23%, list=14%, signal=26%
KEGG_SMALL_CELL_LUNG_CANCER	KEGG_SMALL_CELL_LUNG_CANCER	Details ...	25	-0.264723	-0.810313	0.811676	0.864617	1	186	tags=12%, list=7%, signal=13%
KEGG_HEDGEHOG_SIGNALING_PATHWAY	KEGG_HEDGEHOG_SIGNALING_PATHWAY	Details ...	20	-0.28818	-0.825238	0.708911	0.87009	1	315	tags=25%, list=12%, signal=28%
KEGG_NATURAL_KILLER_CELL_MEDIATED_CYTOTOXICITY	KEGG_NATURAL_KILLER_CELL_MEDIATED_CYTOTOXICITY	Details ...	29	-0.25846	-0.797689	0.797131	0.870644	1	791	tags=34%, list=29%, signal=48%
KEGG_P53_SIGNALING_PATHWAY	KEGG_P53_SIGNALING_PATHWAY	Details ...	21	-0.261259	-0.756724	0.866	0.875794	1	51	tags=10%, list=2%, signal=10%
KEGG_VASCULAR_SMOOTH_MUSCLE_CONTRACTION	KEGG_VASCULAR_SMOOTH_MUSCLE_CONTRACTION	Details ...	31	-0.266046	-0.810751	0.726733	0.880524	1	517	tags=35%, list=19%, signal=43%
KEGG_T_CELL_RECEPTOR_SIGNALING_PATHWAY	KEGG_T_CELL_RECEPTOR_SIGNALING_PATHWAY	Details ...	31	-0.23239	-0.75715	0.862136	0.890054	1	748	tags=42%, list=27%, signal=57%
KEGG_PROSTATE_CANCER	KEGG_PROSTATE_CANCER	Details ...	34	-0.224733	-0.770593	0.86037	0.900977	1	121	tags=9%, list=4%, signal=9%
KEGG_RNA_DEGRADATION	KEGG_RNA_DEGRADATION	Details ...	15	-0.261067	-0.727496	0.81746	0.902254	1	605	tags=27%, list=22%, signal=34%
KEGG_PHOSPHATIDYLINOSITOL_SIGNALING_SYSTEM	KEGG_PHOSPHATIDYLINOSITOL_SIGNALING_SYSTEM	Details ...	22	-0.216554	-0.701056	0.892276	0.903982	1	250	tags=9%, list=9%, signal=10%
KEGG_GAP_JUNCTION	KEGG_GAP_JUNCTION	Details ...	22	-0.243082	-0.7585	0.821012	0.90411	1	488	tags=27%, list=18%, signal=33%
KEGG_CHRONIC_MYELOID_LEUKEMIA	KEGG_CHRONIC_MYELOID_LEUKEMIA	Details ...	24	-0.227983	-0.707488	0.922929	0.910812	1	198	tags=13%, list=7%, signal=13%
KEGG_B_CELL_RECEPTOR_SIGNALING_PATHWAY	KEGG_B_CELL_RECEPTOR_SIGNALING_PATHWAY	Details ...	23	-0.215098	-0.646824	0.921844	0.936712	1	748	tags=35%, list=27%, signal=48%
