# Supplementary material for: Identification of mitochondria-related hub genes in sarcopenia and functional regulation of MFG-E8 on ROS-mediated mitochondrial dysfunction and cell cycle arrest
Source: Royal Society of Chemistry journal article supplement (doi:10.1039/d1fo02610k), 2021-12-01
Supplement: d1fo02610k5.xlsx [file d1fo02610k5.xlsx]

## Sheet: Sheet1
NAME	GS<br> follow link to MSigDB	GS DETAILS	SIZE	ES	NES	NOM p-val	FDR q-val	FWER p-val	RANK AT MAX	LEADING EDGE
GOBP_MITOCHONDRIAL_GENE_EXPRESSION	GOBP_MITOCHONDRIAL_GENE_EXPRESSION	Details ...	31	-0.769152	-2.18244	0	0.018138	0.011	427	tags=74%, list=16%, signal=87%
GOCC_MITOCHONDRIAL_PROTEIN_CONTAINING_COMPLEX	GOCC_MITOCHONDRIAL_PROTEIN_CONTAINING_COMPLEX	Details ...	44	-0.716869	-2.14251	0	0.0119125	0.015	463	tags=68%, list=17%, signal=81%
GOBP_TRANSLATIONAL_TERMINATION	GOBP_TRANSLATIONAL_TERMINATION	Details ...	24	-0.745606	-2.05614	0	0.0238131	0.055	418	tags=71%, list=15%, signal=83%
GOCC_LARGE_RIBOSOMAL_SUBUNIT	GOCC_LARGE_RIBOSOMAL_SUBUNIT	Details ...	29	-0.602798	-2.04368	0.00408998	0.0223949	0.071	339	tags=34%, list=12%, signal=39%
GOBP_MITOCHONDRIAL_TRANSLATION	GOBP_MITOCHONDRIAL_TRANSLATION	Details ...	25	-0.759822	-2.034	0	0.021164	0.084	491	tags=80%, list=18%, signal=97%
GOBP_MITOCHONDRIAL_TRANSLATIONAL_TERMINATION	GOBP_MITOCHONDRIAL_TRANSLATIONAL_TERMINATION	Details ...	21	-0.774825	-2.03244	0	0.0176367	0.084	418	tags=76%, list=15%, signal=89%
GOBP_CELLULAR_RESPIRATION	GOBP_CELLULAR_RESPIRATION	Details ...	41	-0.646958	-2.0324	0	0.0151172	0.084	540	tags=59%, list=20%, signal=72%
GOCC_ORGANELLAR_RIBOSOME	GOCC_ORGANELLAR_RIBOSOME	Details ...	19	-0.759234	-2.00796	0	0.0181355	0.11	418	tags=74%, list=15%, signal=86%
GOCC_ORGANELLE_INNER_MEMBRANE	GOCC_ORGANELLE_INNER_MEMBRANE	Details ...	80	-0.566088	-1.99871	0.00204082	0.017765	0.122	540	tags=55%, list=20%, signal=67%
GOCC_RIBOSOME	GOCC_RIBOSOME	Details ...	56	-0.45844	-1.99268	0.00982318	0.0169683	0.135	418	tags=29%, list=15%, signal=33%
GOBP_ENERGY_DERIVATION_BY_OXIDATION_OF_ORGANIC_COMPOUNDS	GOBP_ENERGY_DERIVATION_BY_OXIDATION_OF_ORGANIC_COMPOUNDS	Details ...	65	-0.59274	-1.97763	0.00200803	0.0182878	0.159	463	tags=46%, list=17%, signal=54%
GOCC_MITOCHONDRIAL_ENVELOPE	GOCC_MITOCHONDRIAL_ENVELOPE	Details ...	108	-0.506674	-1.96493	0	0.0201168	0.19	540	tags=45%, list=20%, signal=54%
GOCC_MITOCHONDRION	GOCC_MITOCHONDRION	Details ...	255	-0.453675	-1.95731	0	0.0203974	0.21	500	tags=37%, list=18%, signal=41%
GOCC_MITOCHONDRIAL_MATRIX	GOCC_MITOCHONDRIAL_MATRIX	Details ...	78	-0.590979	-1.95498	0.0019802	0.0193662	0.212	491	tags=54%, list=18%, signal=64%
GOCC_INNER_MITOCHONDRIAL_MEMBRANE_PROTEIN_COMPLEX	GOCC_INNER_MITOCHONDRIAL_MEMBRANE_PROTEIN_COMPLEX	Details ...	18	-0.734064	-1.94011	0	0.0219695	0.248	540	tags=78%, list=20%, signal=96%
GOCC_RESPIRATORY_CHAIN_COMPLEX	GOCC_RESPIRATORY_CHAIN_COMPLEX	Details ...	16	-0.735137	-1.93301	0	0.0223756	0.264	540	tags=81%, list=20%, signal=101%
GOCC_RIBOSOMAL_SUBUNIT	GOCC_RIBOSOMAL_SUBUNIT	Details ...	52	-0.46064	-1.91705	0.0216535	0.0262224	0.305	418	tags=29%, list=15%, signal=33%
GOCC_ORGANELLE_ENVELOPE_LUMEN	GOCC_ORGANELLE_ENVELOPE_LUMEN	Details ...	17	-0.671673	-1.91214	0.00396825	0.0262555	0.323	293	tags=41%, list=11%, signal=46%
GOCC_OXIDOREDUCTASE_COMPLEX	GOCC_OXIDOREDUCTASE_COMPLEX	Details ...	19	-0.652232	-1.88161	0	0.0368866	0.437	540	tags=68%, list=20%, signal=85%
GOCC_RESPIRASOME	GOCC_RESPIRASOME	Details ...	19	-0.72971	-1.87815	0	0.0370214	0.453	540	tags=79%, list=20%, signal=98%
GOBP_RESPIRATORY_ELECTRON_TRANSPORT_CHAIN	GOBP_RESPIRATORY_ELECTRON_TRANSPORT_CHAIN	Details ...	27	-0.586391	-1.86781	0.00582524	0.0410157	0.501	540	tags=56%, list=20%, signal=69%
GOBP_AEROBIC_RESPIRATION	GOBP_AEROBIC_RESPIRATION	Details ...	20	-0.731612	-1.86652	0.00199601	0.0398817	0.508	441	tags=70%, list=16%, signal=83%
GOBP_TRANSLATIONAL_ELONGATION	GOBP_TRANSLATIONAL_ELONGATION	Details ...	31	-0.590125	-1.86429	0.00609756	0.0392324	0.512	465	tags=52%, list=17%, signal=62%
GOBP_OXIDATIVE_PHOSPHORYLATION	GOBP_OXIDATIVE_PHOSPHORYLATION	Details ...	24	-0.618523	-1.86384	0.00601202	0.0378769	0.516	540	tags=63%, list=20%, signal=77%
GOBP_ATP_SYNTHESIS_COUPLED_ELECTRON_TRANSPORT	GOBP_ATP_SYNTHESIS_COUPLED_ELECTRON_TRANSPORT	Details ...	24	-0.618523	-1.86384	0.00601202	0.0363619	0.516	540	tags=63%, list=20%, signal=77%
GOBP_REGULATION_OF_UBIQUITIN_PROTEIN_TRANSFERASE_ACTIVITY	GOBP_REGULATION_OF_UBIQUITIN_PROTEIN_TRANSFERASE_ACTIVITY	Details ...	17	-0.647917	-1.83187	0.00407332	0.0509889	0.638	59	tags=24%, list=2%, signal=24%
GOBP_CELLULAR_PROTEIN_COMPLEX_DISASSEMBLY	GOBP_CELLULAR_PROTEIN_COMPLEX_DISASSEMBLY	Details ...	54	-0.475964	-1.79563	0	0.0735739	0.761	370	tags=35%, list=14%, signal=40%
GOBP_ELECTRON_TRANSPORT_CHAIN	GOBP_ELECTRON_TRANSPORT_CHAIN	Details ...	39	-0.57469	-1.78043	0.00408163	0.0836735	0.802	540	tags=54%, list=20%, signal=66%
GOMF_OXIDOREDUCTASE_ACTIVITY_ACTING_ON_NAD_P_H	GOMF_OXIDOREDUCTASE_ACTIVITY_ACTING_ON_NAD_P_H	Details ...	19	-0.690536	-1.76655	0.00824742	0.0923691	0.834	540	tags=74%, list=20%, signal=91%
GOBP_L_AMINO_ACID_TRANSPORT	GOBP_L_AMINO_ACID_TRANSPORT	Details ...	15	-0.678218	-1.76462	0.00192308	0.0911824	0.84	47	tags=13%, list=2%, signal=13%
GOBP_APOPTOTIC_MITOCHONDRIAL_CHANGES	GOBP_APOPTOTIC_MITOCHONDRIAL_CHANGES	Details ...	23	-0.611647	-1.73373	0.00804829	0.121436	0.911	487	tags=52%, list=18%, signal=63%
GOBP_REGULATION_OF_MULTICELLULAR_ORGANISM_GROWTH	GOBP_REGULATION_OF_MULTICELLULAR_ORGANISM_GROWTH	Details ...	16	-0.687143	-1.71599	0.00199601	0.140194	0.933	63	tags=31%, list=2%, signal=32%
GOMF_ELECTRON_TRANSFER_ACTIVITY	GOMF_ELECTRON_TRANSFER_ACTIVITY	Details ...	27	-0.613814	-1.68789	0.0175439	0.178526	0.97	540	tags=63%, list=20%, signal=78%
GOBP_PEPTIDE_BIOSYNTHETIC_PROCESS	GOBP_PEPTIDE_BIOSYNTHETIC_PROCESS	Details ...	133	-0.314335	-1.67471	0.0161616	0.197238	0.977	441	tags=23%, list=16%, signal=26%
GOBP_MITOCHONDRION_ORGANIZATION	GOBP_MITOCHONDRION_ORGANIZATION	Details ...	85	-0.392949	-1.66796	0.00391389	0.204596	0.982	487	tags=35%, list=18%, signal=42%
GOMF_STRUCTURAL_CONSTITUENT_OF_RIBOSOME	GOMF_STRUCTURAL_CONSTITUENT_OF_RIBOSOME	Details ...	48	-0.390321	-1.6601	0.0562249	0.213585	0.984	418	tags=23%, list=15%, signal=27%
GOBP_MITOCHONDRIAL_MEMBRANE_ORGANIZATION	GOBP_MITOCHONDRIAL_MEMBRANE_ORGANIZATION	Details ...	23	-0.554771	-1.64471	0.0260521	0.238313	0.988	413	tags=48%, list=15%, signal=56%
GOBP_AMINO_ACID_TRANSMEMBRANE_TRANSPORT	GOBP_AMINO_ACID_TRANSMEMBRANE_TRANSPORT	Details ...	18	-0.591722	-1.64419	0.0114943	0.232987	0.988	47	tags=11%, list=2%, signal=11%
GOMF_ATPASE_BINDING	GOMF_ATPASE_BINDING	Details ...	19	-0.475953	-1.63661	0.0239521	0.242188	0.99	121	tags=16%, list=4%, signal=16%
GOBP_FATTY_ACID_CATABOLIC_PROCESS	GOBP_FATTY_ACID_CATABOLIC_PROCESS	Details ...	18	-0.605475	-1.63533	0.00998004	0.238761	0.99	365	tags=39%, list=13%, signal=45%
GOBP_HIPPOCAMPUS_DEVELOPMENT	GOBP_HIPPOCAMPUS_DEVELOPMENT	Details ...	17	-0.546627	-1.62331	0.0181818	0.257631	0.992	725	tags=53%, list=27%, signal=72%
GOBP_MULTICELLULAR_ORGANISM_GROWTH	GOBP_MULTICELLULAR_ORGANISM_GROWTH	Details ...	35	-0.492425	-1.61733	0.00754717	0.263999	0.992	121	tags=17%, list=4%, signal=18%
GOBP_GENERATION_OF_PRECURSOR_METABOLITES_AND_ENERGY	GOBP_GENERATION_OF_PRECURSOR_METABOLITES_AND_ENERGY	Details ...	122	-0.410034	-1.59621	0.0147679	0.307343	0.995	443	tags=34%, list=16%, signal=38%
GOBP_REGULATION_OF_ANION_TRANSMEMBRANE_TRANSPORT	GOBP_REGULATION_OF_ANION_TRANSMEMBRANE_TRANSPORT	Details ...	25	-0.516395	-1.57641	0.0271967	0.35285	0.999	43	tags=16%, list=2%, signal=16%
GOMF_AMINO_ACID_TRANSMEMBRANE_TRANSPORTER_ACTIVITY	GOMF_AMINO_ACID_TRANSMEMBRANE_TRANSPORTER_ACTIVITY	Details ...	16	-0.600072	-1.57616	0.0153257	0.345672	0.999	47	tags=13%, list=2%, signal=13%
GOBP_RNA_PHOSPHODIESTER_BOND_HYDROLYSIS	GOBP_RNA_PHOSPHODIESTER_BOND_HYDROLYSIS	Details ...	24	-0.512606	-1.57277	0.0361446	0.347648	0.999	305	tags=25%, list=11%, signal=28%
GOBP_REGULATION_OF_PEPTIDYL_SERINE_PHOSPHORYLATION	GOBP_REGULATION_OF_PEPTIDYL_SERINE_PHOSPHORYLATION	Details ...	28	-0.508118	-1.56513	0.0292887	0.361899	1	635	tags=39%, list=23%, signal=51%
GOBP_REGULATION_OF_GLUCOSE_IMPORT	GOBP_REGULATION_OF_GLUCOSE_IMPORT	Details ...	16	-0.619896	-1.56493	0.0165289	0.355001	1	325	tags=38%, list=12%, signal=42%
GOBP_POSITIVE_REGULATION_OF_PEPTIDYL_SERINE_PHOSPHORYLATION	GOBP_POSITIVE_REGULATION_OF_PEPTIDYL_SERINE_PHOSPHORYLATION	Details ...	19	-0.565673	-1.55818	0.0363636	0.367495	1	635	tags=42%, list=23%, signal=55%
GOBP_POSITIVE_REGULATION_OF_ANION_TRANSMEMBRANE_TRANSPORT	GOBP_POSITIVE_REGULATION_OF_ANION_TRANSMEMBRANE_TRANSPORT	Details ...	18	-0.532293	-1.55219	0.0225873	0.376237	1	325	tags=28%, list=12%, signal=31%
GOMF_PROTEIN_SERINE_THREONINE_PHOSPHATASE_ACTIVITY	GOMF_PROTEIN_SERINE_THREONINE_PHOSPHATASE_ACTIVITY	Details ...	16	-0.507926	-1.55174	0.0736842	0.370368	1	433	tags=38%, list=16%, signal=44%
GOBP_LIPID_PHOSPHORYLATION	GOBP_LIPID_PHOSPHORYLATION	Details ...	15	-0.625465	-1.54934	0.0200401	0.370001	1	24	tags=20%, list=1%, signal=20%
GOBP_PROTEIN_CONTAINING_COMPLEX_DISASSEMBLY	GOBP_PROTEIN_CONTAINING_COMPLEX_DISASSEMBLY	Details ...	72	-0.374091	-1.54813	0.00392927	0.366784	1	370	tags=28%, list=14%, signal=31%
GOBP_PEROXISOME_ORGANIZATION	GOBP_PEROXISOME_ORGANIZATION	Details ...	16	-0.59286	-1.54666	0.0603622	0.364122	1	90	tags=25%, list=3%, signal=26%
GOMF_PHOSPHATIDYLINOSITOL_BISPHOSPHATE_BINDING	GOMF_PHOSPHATIDYLINOSITOL_BISPHOSPHATE_BINDING	Details ...	15	-0.562203	-1.53955	0.0354331	0.376342	1	414	tags=47%, list=15%, signal=55%
GOBP_REGULATION_OF_GLUCOSE_TRANSMEMBRANE_TRANSPORT	GOBP_REGULATION_OF_GLUCOSE_TRANSMEMBRANE_TRANSPORT	Details ...	17	-0.588396	-1.53074	0.022869	0.395093	1	325	tags=35%, list=12%, signal=40%
GOBP_REGULATION_OF_MITOCHONDRION_ORGANIZATION	GOBP_REGULATION_OF_MITOCHONDRION_ORGANIZATION	Details ...	31	-0.431756	-1.51746	0.0566406	0.428772	1	413	tags=35%, list=15%, signal=41%
GOBP_PHOSPHATIDYLINOSITOL_METABOLIC_PROCESS	GOBP_PHOSPHATIDYLINOSITOL_METABOLIC_PROCESS	Details ...	37	-0.495386	-1.51275	0.0174419	0.436464	1	250	tags=24%, list=9%, signal=26%
GOBP_AMIDE_BIOSYNTHETIC_PROCESS	GOBP_AMIDE_BIOSYNTHETIC_PROCESS	Details ...	156	-0.294397	-1.51141	0.0123203	0.43294	1	441	tags=22%, list=16%, signal=25%
GOMF_SIGNALING_ADAPTOR_ACTIVITY	GOMF_SIGNALING_ADAPTOR_ACTIVITY	Details ...	16	-0.567903	-1.50974	0.0526316	0.430981	1	354	tags=38%, list=13%, signal=43%
GOBP_REGULATION_OF_DENDRITIC_SPINE_DEVELOPMENT	GOBP_REGULATION_OF_DENDRITIC_SPINE_DEVELOPMENT	Details ...	21	-0.507107	-1.50733	0.0349515	0.431385	1	725	tags=33%, list=27%, signal=45%
GOBP_PEPTIDE_METABOLIC_PROCESS	GOBP_PEPTIDE_METABOLIC_PROCESS	Details ...	166	-0.295483	-1.50329	0.0180723	0.437389	1	441	tags=22%, list=16%, signal=25%
GOBP_GLUCOSE_IMPORT	GOBP_GLUCOSE_IMPORT	Details ...	18	-0.575839	-1.50199	0.0389344	0.434791	1	325	tags=33%, list=12%, signal=38%
GOBP_REGULATION_OF_GLIOGENESIS	GOBP_REGULATION_OF_GLIOGENESIS	Details ...	17	-0.521783	-1.50008	0.0519231	0.433961	1	983	tags=71%, list=36%, signal=110%
GOMF_PHOSPHOPROTEIN_PHOSPHATASE_ACTIVITY	GOMF_PHOSPHOPROTEIN_PHOSPHATASE_ACTIVITY	Details ...	38	-0.425829	-1.49138	0.0412371	0.454861	1	621	tags=37%, list=23%, signal=47%
GOBP_REGULATION_OF_CELLULAR_RESPONSE_TO_INSULIN_STIMULUS	GOBP_REGULATION_OF_CELLULAR_RESPONSE_TO_INSULIN_STIMULUS	Details ...	18	-0.51175	-1.48578	0.0575816	0.465968	1	450	tags=33%, list=17%, signal=40%
GOBP_MONOCARBOXYLIC_ACID_CATABOLIC_PROCESS	GOBP_MONOCARBOXYLIC_ACID_CATABOLIC_PROCESS	Details ...	21	-0.529152	-1.4832	0.0607287	0.467596	1	365	tags=38%, list=13%, signal=44%
GOCC_EXTRINSIC_COMPONENT_OF_MEMBRANE	GOCC_EXTRINSIC_COMPONENT_OF_MEMBRANE	Details ...	66	-0.404936	-1.47389	0.0148423	0.491922	1	354	tags=24%, list=13%, signal=27%
GOBP_REGULATION_OF_HEMATOPOIETIC_PROGENITOR_CELL_DIFFERENTIATION	GOBP_REGULATION_OF_HEMATOPOIETIC_PROGENITOR_CELL_DIFFERENTIATION	Details ...	20	-0.473139	-1.47111	0.0880626	0.494224	1	812	tags=55%, list=30%, signal=78%
GOBP_POSITIVE_REGULATION_OF_MITOCHONDRION_ORGANIZATION	GOBP_POSITIVE_REGULATION_OF_MITOCHONDRION_ORGANIZATION	Details ...	17	-0.48172	-1.46526	0.0682261	0.507454	1	413	tags=41%, list=15%, signal=48%
GOBP_RECEPTOR_LOCALIZATION_TO_SYNAPSE	GOBP_RECEPTOR_LOCALIZATION_TO_SYNAPSE	Details ...	15	-0.526354	-1.45697	0.0606061	0.529481	1	737	tags=60%, list=27%, signal=82%
GOBP_PROTEIN_LOCALIZATION_TO_SYNAPSE	GOBP_PROTEIN_LOCALIZATION_TO_SYNAPSE	Details ...	21	-0.450943	-1.45442	0.0653061	0.532066	1	737	tags=57%, list=27%, signal=78%
GOCC_SARCOPLASM	GOCC_SARCOPLASM	Details ...	21	-0.413161	-1.45331	0.0607843	0.528732	1	359	tags=29%, list=13%, signal=33%
GOCC_ENVELOPE	GOCC_ENVELOPE	Details ...	199	-0.31843	-1.44962	0.035503	0.534702	1	540	tags=31%, list=20%, signal=36%
GOBP_SPERMATID_DIFFERENTIATION	GOBP_SPERMATID_DIFFERENTIATION	Details ...	24	-0.451266	-1.44844	0.0584677	0.531516	1	263	tags=25%, list=10%, signal=27%
GOCC_CLATHRIN_COATED_PIT	GOCC_CLATHRIN_COATED_PIT	Details ...	22	-0.444902	-1.44246	0.0828402	0.545412	1	509	tags=36%, list=19%, signal=44%
GOBP_REGULATION_OF_PHOSPHATASE_ACTIVITY	GOBP_REGULATION_OF_PHOSPHATASE_ACTIVITY	Details ...	20	-0.473259	-1.43529	0.0659134	0.565133	1	534	tags=45%, list=20%, signal=56%
GOMF_RIBONUCLEASE_ACTIVITY	GOMF_RIBONUCLEASE_ACTIVITY	Details ...	19	-0.501592	-1.43408	0.085595	0.562314	1	305	tags=26%, list=11%, signal=29%
GOBP_LIMBIC_SYSTEM_DEVELOPMENT	GOBP_LIMBIC_SYSTEM_DEVELOPMENT	Details ...	24	-0.429215	-1.42617	0.0783505	0.584216	1	725	tags=42%, list=27%, signal=56%
GOBP_RECEPTOR_SIGNALING_PATHWAY_VIA_STAT	GOBP_RECEPTOR_SIGNALING_PATHWAY_VIA_STAT	Details ...	29	-0.455862	-1.42299	0.0780287	0.589384	1	580	tags=45%, list=21%, signal=56%
GOBP_NEUROTRANSMITTER_UPTAKE	GOBP_NEUROTRANSMITTER_UPTAKE	Details ...	15	-0.524745	-1.4214	0.0604915	0.588033	1	2	tags=7%, list=0%, signal=7%
GOBP_PEPTIDYL_THREONINE_MODIFICATION	GOBP_PEPTIDYL_THREONINE_MODIFICATION	Details ...	18	-0.512211	-1.42088	0.0935551	0.582724	1	601	tags=33%, list=22%, signal=42%
GOBP_PROTEIN_LOCALIZATION_TO_MITOCHONDRION	GOBP_PROTEIN_LOCALIZATION_TO_MITOCHONDRION	Details ...	32	-0.406217	-1.40799	0.0808679	0.625403	1	692	tags=50%, list=25%, signal=66%
GOBP_PEPTIDYL_TYROSINE_DEPHOSPHORYLATION	GOBP_PEPTIDYL_TYROSINE_DEPHOSPHORYLATION	Details ...	27	-0.447218	-1.38976	0.076	0.692332	1	281	tags=19%, list=10%, signal=20%
GOMF_PROTEIN_TYROSINE_PHOSPHATASE_ACTIVITY	GOMF_PROTEIN_TYROSINE_PHOSPHATASE_ACTIVITY	Details ...	27	-0.447218	-1.38976	0.076	0.684187	1	281	tags=19%, list=10%, signal=20%
GOMF_EXOPEPTIDASE_ACTIVITY	GOMF_EXOPEPTIDASE_ACTIVITY	Details ...	17	-0.524331	-1.38853	0.10099	0.681573	1	693	tags=47%, list=25%, signal=63%
GOBP_LIPID_MODIFICATION	GOBP_LIPID_MODIFICATION	Details ...	50	-0.433572	-1.38841	0.0492813	0.67428	1	301	tags=24%, list=11%, signal=26%
GOBP_NEGATIVE_REGULATION_OF_DEVELOPMENTAL_GROWTH	GOBP_NEGATIVE_REGULATION_OF_DEVELOPMENTAL_GROWTH	Details ...	31	-0.42907	-1.38611	0.0784708	0.676202	1	407	tags=29%, list=15%, signal=34%
GOBP_ORGANIC_ACID_TRANSMEMBRANE_TRANSPORT	GOBP_ORGANIC_ACID_TRANSMEMBRANE_TRANSPORT	Details ...	33	-0.448703	-1.38572	0.0653465	0.670049	1	47	tags=9%, list=2%, signal=9%
GOCC_MICROBODY	GOCC_MICROBODY	Details ...	23	-0.481624	-1.38238	0.0938776	0.676081	1	387	tags=26%, list=14%, signal=30%
GOCC_TRANSFERASE_COMPLEX_TRANSFERRING_PHOSPHORUS_CONTAINING_GROUPS	GOCC_TRANSFERASE_COMPLEX_TRANSFERRING_PHOSPHORUS_CONTAINING_GROUPS	Details ...	57	-0.393999	-1.37791	0.040404	0.686842	1	88	tags=14%, list=3%, signal=14%
GOMF_PHOSPHATASE_ACTIVITY	GOMF_PHOSPHATASE_ACTIVITY	Details ...	54	-0.381294	-1.37686	0.0518672	0.683577	1	621	tags=33%, list=23%, signal=42%
GOBP_GLYCEROPHOSPHOLIPID_METABOLIC_PROCESS	GOBP_GLYCEROPHOSPHOLIPID_METABOLIC_PROCESS	Details ...	61	-0.388545	-1.3765	0.0423387	0.677901	1	250	tags=16%, list=9%, signal=18%
GOBP_FATTY_ACID_METABOLIC_PROCESS	GOBP_FATTY_ACID_METABOLIC_PROCESS	Details ...	54	-0.384497	-1.376	0.0547945	0.67275	1	498	tags=33%, list=18%, signal=40%
GOBP_ENERGY_RESERVE_METABOLIC_PROCESS	GOBP_ENERGY_RESERVE_METABOLIC_PROCESS	Details ...	24	-0.493802	-1.37562	0.0945674	0.667038	1	429	tags=33%, list=16%, signal=39%
GOBP_REGULATION_OF_REGULATED_SECRETORY_PATHWAY	GOBP_REGULATION_OF_REGULATED_SECRETORY_PATHWAY	Details ...	31	-0.433617	-1.36648	0.0641822	0.697505	1	457	tags=32%, list=17%, signal=38%
GOCC_POLYSOME	GOCC_POLYSOME	Details ...	16	-0.418413	-1.36479	0.134357	0.69739	1	122	tags=13%, list=4%, signal=13%
GOBP_PROTEIN_DEPHOSPHORYLATION	GOBP_PROTEIN_DEPHOSPHORYLATION	Details ...	58	-0.356339	-1.35753	0.0645161	0.720622	1	641	tags=36%, list=24%, signal=46%
GOBP_AMINO_ACID_TRANSPORT	GOBP_AMINO_ACID_TRANSPORT	Details ...	31	-0.416354	-1.35476	0.0566038	0.725029	1	87	tags=10%, list=3%, signal=10%
GOBP_PEROXISOMAL_TRANSPORT	GOBP_PEROXISOMAL_TRANSPORT	Details ...	15	-0.51476	-1.35377	0.129293	0.721595	1	301	tags=27%, list=11%, signal=30%
GOBP_CELLULAR_RESPONSE_TO_VASCULAR_ENDOTHELIAL_GROWTH_FACTOR_STIMULUS	GOBP_CELLULAR_RESPONSE_TO_VASCULAR_ENDOTHELIAL_GROWTH_FACTOR_STIMULUS		15	-0.509877	-1.35135	0.112033	0.724725	1	457	tags=47%, list=17%, signal=56%
GOMF_UNFOLDED_PROTEIN_BINDING	GOMF_UNFOLDED_PROTEIN_BINDING		22	-0.397711	-1.34771	0.15304	0.732573	1	882	tags=45%, list=32%, signal=67%
GOCC_INTRINSIC_COMPONENT_OF_POSTSYNAPTIC_SPECIALIZATION_MEMBRANE	GOCC_INTRINSIC_COMPONENT_OF_POSTSYNAPTIC_SPECIALIZATION_MEMBRANE		16	-0.468691	-1.34439	0.114519	0.739623	1	784	tags=50%, list=29%, signal=70%
GOCC_POSTSYNAPTIC_DENSITY_MEMBRANE	GOCC_POSTSYNAPTIC_DENSITY_MEMBRANE		23	-0.416903	-1.34438	0.0931677	0.732549	1	889	tags=57%, list=33%, signal=83%
GOBP_DEPHOSPHORYLATION	GOBP_DEPHOSPHORYLATION		83	-0.341969	-1.34378	0.0537849	0.728067	1	641	tags=35%, list=24%, signal=44%
GOMF_CHAPERONE_BINDING	GOMF_CHAPERONE_BINDING		22	-0.390803	-1.34247	0.101266	0.726827	1	589	tags=36%, list=22%, signal=46%
GOBP_ORGANELLE_FUSION	GOBP_ORGANELLE_FUSION		33	-0.411059	-1.34116	0.090535	0.725495	1	471	tags=36%, list=17%, signal=43%
GOMF_TRANSFERASE_ACTIVITY_TRANSFERRING_ONE_CARBON_GROUPS	GOMF_TRANSFERASE_ACTIVITY_TRANSFERRING_ONE_CARBON_GROUPS		25	-0.432124	-1.33928	0.120968	0.726465	1	623	tags=40%, list=23%, signal=51%
GOBP_MITOCHONDRIAL_TRANSPORT	GOBP_MITOCHONDRIAL_TRANSPORT		48	-0.372127	-1.33438	0.126252	0.740866	1	487	tags=33%, list=18%, signal=40%
GOBP_PEPTIDYL_SERINE_MODIFICATION	GOBP_PEPTIDYL_SERINE_MODIFICATION		81	-0.333147	-1.33005	0.0708661	0.753758	1	601	tags=28%, list=22%, signal=35%
GOBP_SYNAPTIC_VESICLE_RECYCLING	GOBP_SYNAPTIC_VESICLE_RECYCLING		17	-0.436516	-1.32896	0.140244	0.751515	1	568	tags=29%, list=21%, signal=37%
GOBP_POSITIVE_REGULATION_OF_JNK_CASCADE	GOBP_POSITIVE_REGULATION_OF_JNK_CASCADE		17	-0.487657	-1.32889	0.121212	0.745156	1	217	tags=18%, list=8%, signal=19%
GOBP_POSITIVE_REGULATION_OF_ENDOTHELIAL_CELL_MIGRATION	GOBP_POSITIVE_REGULATION_OF_ENDOTHELIAL_CELL_MIGRATION		26	-0.458153	-1.32679	0.0974155	0.74792	1	241	tags=27%, list=9%, signal=29%
GOBP_ATP_METABOLIC_PROCESS	GOBP_ATP_METABOLIC_PROCESS		67	-0.317827	-1.32418	0.0740038	0.752294	1	323	tags=24%, list=12%, signal=26%
GOBP_NEGATIVE_REGULATION_OF_CELL_CYCLE_G2_M_PHASE_TRANSITION	GOBP_NEGATIVE_REGULATION_OF_CELL_CYCLE_G2_M_PHASE_TRANSITION		15	-0.410136	-1.32384	0.170683	0.747209	1	10	tags=7%, list=0%, signal=7%
GOBP_CELLULAR_GLUCAN_METABOLIC_PROCESS	GOBP_CELLULAR_GLUCAN_METABOLIC_PROCESS		22	-0.477555	-1.32279	0.129436	0.745334	1	429	tags=32%, list=16%, signal=37%
GOBP_LIPID_OXIDATION	GOBP_LIPID_OXIDATION		19	-0.513393	-1.32237	0.150794	0.740728	1	365	tags=37%, list=13%, signal=42%
GOCC_MEMBRANE_PROTEIN_COMPLEX	GOCC_MEMBRANE_PROTEIN_COMPLEX		250	-0.283064	-1.32147	0.0118812	0.738227	1	520	tags=26%, list=19%, signal=30%
GOBP_POSITIVE_REGULATION_OF_PROTEASOMAL_UBIQUITIN_DEPENDENT_PROTEIN_CATABOLIC_PROCESS	GOBP_POSITIVE_REGULATION_OF_PROTEASOMAL_UBIQUITIN_DEPENDENT_PROTEIN_CATABOLIC_PROCESS		18	-0.435784	-1.32088	0.147705	0.734529	1	338	tags=33%, list=12%, signal=38%
GOBP_ORGANONITROGEN_COMPOUND_BIOSYNTHETIC_PROCESS	GOBP_ORGANONITROGEN_COMPOUND_BIOSYNTHETIC_PROCESS		321	-0.264739	-1.32046	0.0287474	0.730175	1	441	tags=22%, list=16%, signal=23%
GOMF_OXIDOREDUCTASE_ACTIVITY	GOMF_OXIDOREDUCTASE_ACTIVITY		106	-0.336246	-1.31672	0.0728745	0.739461	1	577	tags=38%, list=21%, signal=46%
GOCC_METHYLTRANSFERASE_COMPLEX	GOCC_METHYLTRANSFERASE_COMPLEX		17	-0.432244	-1.31541	0.188976	0.739183	1	156	tags=12%, list=6%, signal=12%
GOBP_TYROSINE_PHOSPHORYLATION_OF_STAT_PROTEIN	GOBP_TYROSINE_PHOSPHORYLATION_OF_STAT_PROTEIN		15	-0.486946	-1.31218	0.153226	0.746538	1	580	tags=53%, list=21%, signal=67%
GOMF_HYDROLASE_ACTIVITY_ACTING_ON_ESTER_BONDS	GOMF_HYDROLASE_ACTIVITY_ACTING_ON_ESTER_BONDS		123	-0.323766	-1.31208	0.0383795	0.740856	1	626	tags=29%, list=23%, signal=36%
GOBP_CELLULAR_RESPONSE_TO_KETONE	GOBP_CELLULAR_RESPONSE_TO_KETONE		23	-0.431888	-1.31155	0.116564	0.736944	1	415	tags=30%, list=15%, signal=36%
GOBP_REGULATION_OF_LIPID_CATABOLIC_PROCESS	GOBP_REGULATION_OF_LIPID_CATABOLIC_PROCESS		15	-0.516449	-1.3102	0.131274	0.736558	1	798	tags=60%, list=29%, signal=84%
GOMF_MAGNESIUM_ION_BINDING	GOMF_MAGNESIUM_ION_BINDING		52	-0.359014	-1.30938	0.0841683	0.73425	1	595	tags=31%, list=22%, signal=39%
GOMF_KINASE_REGULATOR_ACTIVITY	GOMF_KINASE_REGULATOR_ACTIVITY		44	-0.35199	-1.30848	0.0838323	0.732306	1	24	tags=9%, list=1%, signal=9%
GOBP_REGULATION_OF_CIRCADIAN_RHYTHM	GOBP_REGULATION_OF_CIRCADIAN_RHYTHM		42	-0.407909	-1.30521	0.134146	0.739672	1	429	tags=29%, list=16%, signal=33%
GOBP_ANION_TRANSMEMBRANE_TRANSPORT	GOBP_ANION_TRANSMEMBRANE_TRANSPORT		114	-0.342767	-1.30359	0.0458167	0.740766	1	393	tags=18%, list=14%, signal=21%
GOBP_CARBOHYDRATE_TRANSMEMBRANE_TRANSPORT	GOBP_CARBOHYDRATE_TRANSMEMBRANE_TRANSPORT		25	-0.448849	-1.30299	0.124236	0.737374	1	43	tags=16%, list=2%, signal=16%
GOBP_CALCIUM_ION_IMPORT	GOBP_CALCIUM_ION_IMPORT		19	-0.451986	-1.30247	0.174	0.733938	1	777	tags=47%, list=29%, signal=66%
GOBP_PHOSPHATIDYLINOSITOL_3_KINASE_SIGNALING	GOBP_PHOSPHATIDYLINOSITOL_3_KINASE_SIGNALING		42	-0.399107	-1.30209	0.0978044	0.729995	1	227	tags=24%, list=8%, signal=26%
GOBP_CELLULAR_AMIDE_METABOLIC_PROCESS	GOBP_CELLULAR_AMIDE_METABOLIC_PROCESS		214	-0.26582	-1.29747	0.053719	0.743521	1	370	tags=18%, list=14%, signal=19%
GOBP_ORGANOPHOSPHATE_BIOSYNTHETIC_PROCESS	GOBP_ORGANOPHOSPHATE_BIOSYNTHETIC_PROCESS		107	-0.338543	-1.29682	0.0566802	0.74077	1	310	tags=20%, list=11%, signal=21%
GOBP_PROTON_TRANSMEMBRANE_TRANSPORT	GOBP_PROTON_TRANSMEMBRANE_TRANSPORT		28	-0.413706	-1.29581	0.14433	0.739622	1	531	tags=43%, list=19%, signal=53%
GOBP_REGULATION_OF_NEUROTRANSMITTER_RECEPTOR_ACTIVITY	GOBP_REGULATION_OF_NEUROTRANSMITTER_RECEPTOR_ACTIVITY		18	-0.425561	-1.29536	0.164706	0.735881	1	737	tags=50%, list=27%, signal=68%
GOBP_POSITIVE_REGULATION_OF_PROTEOLYSIS_INVOLVED_IN_CELLULAR_PROTEIN_CATABOLIC_PROCESS	GOBP_POSITIVE_REGULATION_OF_PROTEOLYSIS_INVOLVED_IN_CELLULAR_PROTEIN_CATABOLIC_PROCESS		28	-0.39517	-1.29177	0.155556	0.745311	1	338	tags=25%, list=12%, signal=28%
GOBP_PHOSPHOLIPID_METABOLIC_PROCESS	GOBP_PHOSPHOLIPID_METABOLIC_PROCESS		76	-0.352891	-1.28944	0.0725806	0.749576	1	250	tags=14%, list=9%, signal=15%
GOBP_LIPID_CATABOLIC_PROCESS	GOBP_LIPID_CATABOLIC_PROCESS		49	-0.367359	-1.28697	0.135189	0.754539	1	365	tags=20%, list=13%, signal=23%
GOBP_POSITIVE_REGULATION_OF_CYSTEINE_TYPE_ENDOPEPTIDASE_ACTIVITY	GOBP_POSITIVE_REGULATION_OF_CYSTEINE_TYPE_ENDOPEPTIDASE_ACTIVITY		33	-0.350678	-1.28539	0.134725	0.755951	1	692	tags=39%, list=25%, signal=52%
GOBP_SODIUM_ION_TRANSPORT	GOBP_SODIUM_ION_TRANSPORT		50	-0.367202	-1.28273	0.111742	0.761405	1	102	tags=10%, list=4%, signal=10%
GOBP_ACTIVATION_OF_PROTEIN_KINASE_ACTIVITY	GOBP_ACTIVATION_OF_PROTEIN_KINASE_ACTIVITY		75	-0.335421	-1.28113	0.0897959	0.762787	1	621	tags=25%, list=23%, signal=32%
GOBP_CELLULAR_COMPONENT_DISASSEMBLY	GOBP_CELLULAR_COMPONENT_DISASSEMBLY		117	-0.275461	-1.27831	0.0737052	0.769306	1	370	tags=21%, list=14%, signal=23%
GOBP_CELLULAR_LIPID_METABOLIC_PROCESS	GOBP_CELLULAR_LIPID_METABOLIC_PROCESS		164	-0.31203	-1.2722	0.0455446	0.78932	1	393	tags=21%, list=14%, signal=23%
GOCC_ENDOPLASMIC_RETICULUM_GOLGI_INTERMEDIATE_COMPARTMENT	GOCC_ENDOPLASMIC_RETICULUM_GOLGI_INTERMEDIATE_COMPARTMENT		27	-0.399266	-1.27201	0.164948	0.784648	1	1025	tags=48%, list=38%, signal=76%
GOBP_REGULATION_OF_TUBE_SIZE	GOBP_REGULATION_OF_TUBE_SIZE		34	-0.398487	-1.26858	0.13745	0.793082	1	517	tags=35%, list=19%, signal=43%
GOBP_GLYCEROLIPID_METABOLIC_PROCESS	GOBP_GLYCEROLIPID_METABOLIC_PROCESS		73	-0.341631	-1.26379	0.109562	0.8084	1	574	tags=25%, list=21%, signal=30%
GOMF_ORGANIC_ACID_TRANSMEMBRANE_TRANSPORTER_ACTIVITY	GOMF_ORGANIC_ACID_TRANSMEMBRANE_TRANSPORTER_ACTIVITY		27	-0.437048	-1.26332	0.142292	0.804918	1	47	tags=7%, list=2%, signal=7%
GOBP_VESICLE_MEDIATED_TRANSPORT_IN_SYNAPSE	GOBP_VESICLE_MEDIATED_TRANSPORT_IN_SYNAPSE		44	-0.339541	-1.26203	0.134653	0.805001	1	791	tags=39%, list=29%, signal=54%
GOBP_REGULATION_OF_DNA_BINDING	GOBP_REGULATION_OF_DNA_BINDING		28	-0.379564	-1.26201	0.135628	0.799763	1	156	tags=14%, list=6%, signal=15%
GOBP_RESPONSE_TO_LEUKEMIA_INHIBITORY_FACTOR	GOBP_RESPONSE_TO_LEUKEMIA_INHIBITORY_FACTOR		22	-0.422161	-1.25937	0.156746	0.805457	1	450	tags=41%, list=17%, signal=49%
GOBP_HINDBRAIN_DEVELOPMENT	GOBP_HINDBRAIN_DEVELOPMENT		30	-0.390779	-1.25924	0.153242	0.800722	1	725	tags=40%, list=27%, signal=54%
GOBP_CELLULAR_LIPID_CATABOLIC_PROCESS	GOBP_CELLULAR_LIPID_CATABOLIC_PROCESS		38	-0.384522	-1.25507	0.169591	0.813257	1	823	tags=42%, list=30%, signal=59%
GOCC_PLATELET_ALPHA_GRANULE	GOCC_PLATELET_ALPHA_GRANULE		18	-0.42204	-1.25092	0.207101	0.825467	1	393	tags=28%, list=14%, signal=32%
GOBP_CATION_TRANSPORT	GOBP_CATION_TRANSPORT		220	-0.270862	-1.24951	0.0433884	0.826205	1	604	tags=27%, list=22%, signal=32%
GOCC_POSTSYNAPTIC_SPECIALIZATION_MEMBRANE	GOCC_POSTSYNAPTIC_SPECIALIZATION_MEMBRANE		28	-0.373241	-1.24478	0.168378	0.841655	1	889	tags=50%, list=33%, signal=73%
GOBP_REGULATION_OF_DEVELOPMENTAL_GROWTH	GOBP_REGULATION_OF_DEVELOPMENTAL_GROWTH		87	-0.318566	-1.24477	0.11359	0.836351	1	407	tags=22%, list=15%, signal=25%
GOBP_NEGATIVE_REGULATION_OF_RESPONSE_TO_BIOTIC_STIMULUS	GOBP_NEGATIVE_REGULATION_OF_RESPONSE_TO_BIOTIC_STIMULUS		16	-0.42272	-1.24342	0.212679	0.836749	1	776	tags=50%, list=28%, signal=70%
GOBP_REGULATION_OF_EXTENT_OF_CELL_GROWTH	GOBP_REGULATION_OF_EXTENT_OF_CELL_GROWTH		31	-0.361742	-1.24096	0.202479	0.842301	1	400	tags=29%, list=15%, signal=34%
GOMF_MOLECULAR_ADAPTOR_ACTIVITY	GOMF_MOLECULAR_ADAPTOR_ACTIVITY		70	-0.31548	-1.24001	0.124473	0.840955	1	395	tags=23%, list=15%, signal=26%
GOBP_VASCULAR_TRANSPORT	GOBP_VASCULAR_TRANSPORT		31	-0.418696	-1.23967	0.149897	0.83738	1	651	tags=45%, list=24%, signal=59%
GOBP_METAL_ION_TRANSPORT	GOBP_METAL_ION_TRANSPORT		92	-0.298013	-1.23849	0.0984683	0.83752	1	659	tags=35%, list=24%, signal=44%
GOCC_ANCHORED_COMPONENT_OF_MEMBRANE	GOCC_ANCHORED_COMPONENT_OF_MEMBRANE		29	-0.368701	-1.23846	0.167677	0.832568	1	639	tags=38%, list=23%, signal=49%
GOBP_MAMMARY_GLAND_DEVELOPMENT	GOBP_MAMMARY_GLAND_DEVELOPMENT		39	-0.347777	-1.23783	0.138833	0.83029	1	145	tags=10%, list=5%, signal=11%
GOBP_TELENCEPHALON_DEVELOPMENT	GOBP_TELENCEPHALON_DEVELOPMENT		57	-0.337504	-1.23594	0.141748	0.833339	1	725	tags=40%, list=27%, signal=54%
GOBP_REGULATION_OF_PROTEIN_LOCALIZATION_TO_MEMBRANE	GOBP_REGULATION_OF_PROTEIN_LOCALIZATION_TO_MEMBRANE		45	-0.347758	-1.23515	0.175197	0.831681	1	792	tags=49%, list=29%, signal=68%
GOBP_POLYSACCHARIDE_METABOLIC_PROCESS	GOBP_POLYSACCHARIDE_METABOLIC_PROCESS		30	-0.3835	-1.23341	0.180583	0.833869	1	429	tags=27%, list=16%, signal=31%
GOBP_CELL_MATURATION	GOBP_CELL_MATURATION		28	-0.38508	-1.23149	0.193939	0.836967	1	611	tags=32%, list=22%, signal=41%
GOBP_CYCLIC_NUCLEOTIDE_MEDIATED_SIGNALING	GOBP_CYCLIC_NUCLEOTIDE_MEDIATED_SIGNALING		25	-0.395257	-1.23003	0.194231	0.837862	1	473	tags=32%, list=17%, signal=38%
GOBP_MAMMARY_GLAND_EPITHELIUM_DEVELOPMENT	GOBP_MAMMARY_GLAND_EPITHELIUM_DEVELOPMENT		19	-0.436833	-1.2284	0.19877	0.839797	1	694	tags=37%, list=25%, signal=49%
GOMF_TRANSLATION_FACTOR_ACTIVITY_RNA_BINDING	GOMF_TRANSLATION_FACTOR_ACTIVITY_RNA_BINDING		18	-0.396859	-1.22751	0.200418	0.838871	1	700	tags=50%, list=26%, signal=67%
GOBP_REGULATION_OF_CYSTEINE_TYPE_ENDOPEPTIDASE_ACTIVITY	GOBP_REGULATION_OF_CYSTEINE_TYPE_ENDOPEPTIDASE_ACTIVITY		47	-0.314175	-1.2275	0.168539	0.834091	1	749	tags=38%, list=27%, signal=52%
GOBP_CIRCADIAN_RHYTHM	GOBP_CIRCADIAN_RHYTHM		63	-0.352036	-1.22705	0.178138	0.831334	1	438	tags=25%, list=16%, signal=30%
GOBP_NEGATIVE_REGULATION_OF_AXONOGENESIS	GOBP_NEGATIVE_REGULATION_OF_AXONOGENESIS		18	-0.404974	-1.22451	0.200811	0.837446	1	983	tags=67%, list=36%, signal=104%
GOBP_CYTOPLASMIC_TRANSLATION	GOBP_CYTOPLASMIC_TRANSLATION		23	-0.341091	-1.22429	0.228916	0.833694	1	700	tags=30%, list=26%, signal=41%
GOBP_TOR_SIGNALING	GOBP_TOR_SIGNALING		17	-0.444321	-1.22393	0.219207	0.830542	1	394	tags=24%, list=14%, signal=27%
GOBP_POSITIVE_REGULATION_OF_CELLULAR_PROTEIN_CATABOLIC_PROCESS	GOBP_POSITIVE_REGULATION_OF_CELLULAR_PROTEIN_CATABOLIC_PROCESS		33	-0.349771	-1.22336	0.213018	0.828236	1	338	tags=21%, list=12%, signal=24%
GOCC_NON_MOTILE_CILIUM	GOCC_NON_MOTILE_CILIUM		18	-0.495647	-1.22278	0.207364	0.8259	1	154	tags=22%, list=6%, signal=23%
GOMF_KINASE_ACTIVATOR_ACTIVITY	GOMF_KINASE_ACTIVATOR_ACTIVITY		18	-0.394743	-1.22254	0.179048	0.822323	1	24	tags=11%, list=1%, signal=11%
GOBP_NUCLEOSIDE_TRIPHOSPHATE_METABOLIC_PROCESS	GOBP_NUCLEOSIDE_TRIPHOSPHATE_METABOLIC_PROCESS		15	-0.424012	-1.22232	0.210634	0.818693	1	365	tags=27%, list=13%, signal=31%
GOBP_ORGANOPHOSPHATE_CATABOLIC_PROCESS	GOBP_ORGANOPHOSPHATE_CATABOLIC_PROCESS		34	-0.363432	-1.21979	0.170635	0.824935	1	626	tags=32%, list=23%, signal=41%
GOMF_TRANSFERASE_ACTIVITY_TRANSFERRING_SULFUR_CONTAINING_GROUPS	GOMF_TRANSFERASE_ACTIVITY_TRANSFERRING_SULFUR_CONTAINING_GROUPS		15	-0.411942	-1.21443	0.230019	0.842329	1	730	tags=47%, list=27%, signal=63%
GOBP_SYNAPTIC_VESICLE_EXOCYTOSIS	GOBP_SYNAPTIC_VESICLE_EXOCYTOSIS		24	-0.392716	-1.21424	0.207585	0.83853	1	471	tags=25%, list=17%, signal=30%
GOMF_NUCLEOTIDYLTRANSFERASE_ACTIVITY	GOMF_NUCLEOTIDYLTRANSFERASE_ACTIVITY		27	-0.365751	-1.21359	0.191919	0.836624	1	631	tags=44%, list=23%, signal=57%
GOCC_SMALL_RIBOSOMAL_SUBUNIT	GOCC_SMALL_RIBOSOMAL_SUBUNIT		24	-0.344923	-1.21307	0.263566	0.834195	1	418	tags=25%, list=15%, signal=29%
GOBP_NUCLEOBASE_CONTAINING_SMALL_MOLECULE_BIOSYNTHETIC_PROCESS	GOBP_NUCLEOBASE_CONTAINING_SMALL_MOLECULE_BIOSYNTHETIC_PROCESS		28	-0.35413	-1.21242	0.202	0.832595	1	473	tags=25%, list=17%, signal=30%
GOBP_REGULATION_OF_DENDRITE_DEVELOPMENT	GOBP_REGULATION_OF_DENDRITE_DEVELOPMENT		27	-0.372805	-1.2097	0.211382	0.83941	1	354	tags=26%, list=13%, signal=30%
GOBP_POSITIVE_REGULATION_OF_PROTEIN_LOCALIZATION_TO_MEMBRANE	GOBP_POSITIVE_REGULATION_OF_PROTEIN_LOCALIZATION_TO_MEMBRANE		31	-0.376545	-1.20456	0.21748	0.855849	1	843	tags=52%, list=31%, signal=74%
GOCC_OUTER_MEMBRANE	GOCC_OUTER_MEMBRANE		34	-0.334229	-1.20272	0.212245	0.859171	1	354	tags=24%, list=13%, signal=27%
GOBP_REGULATION_OF_INTRINSIC_APOPTOTIC_SIGNALING_PATHWAY	GOBP_REGULATION_OF_INTRINSIC_APOPTOTIC_SIGNALING_PATHWAY		34	-0.324699	-1.20259	0.228457	0.855198	1	274	tags=12%, list=10%, signal=13%
GOBP_NEGATIVE_REGULATION_OF_DEFENSE_RESPONSE	GOBP_NEGATIVE_REGULATION_OF_DEFENSE_RESPONSE		34	-0.368933	-1.20194	0.251012	0.853453	1	608	tags=35%, list=22%, signal=45%
GOBP_INOSITOL_LIPID_MEDIATED_SIGNALING	GOBP_INOSITOL_LIPID_MEDIATED_SIGNALING		51	-0.356168	-1.19973	0.171315	0.858221	1	227	tags=22%, list=8%, signal=23%
GOBP_REGULATION_OF_DENDRITE_MORPHOGENESIS	GOBP_REGULATION_OF_DENDRITE_MORPHOGENESIS		21	-0.399823	-1.19906	0.222445	0.85648	1	542	tags=38%, list=20%, signal=47%
GOBP_TRANSITION_METAL_ION_TRANSPORT	GOBP_TRANSITION_METAL_ION_TRANSPORT		24	-0.385606	-1.19833	0.225	0.855184	1	560	tags=42%, list=21%, signal=52%
GOBP_POSITIVE_REGULATION_OF_UBIQUITIN_DEPENDENT_PROTEIN_CATABOLIC_PROCESS	GOBP_POSITIVE_REGULATION_OF_UBIQUITIN_DEPENDENT_PROTEIN_CATABOLIC_PROCESS		22	-0.369325	-1.1974	0.243461	0.854649	1	338	tags=27%, list=12%, signal=31%
GOMF_PROTON_TRANSMEMBRANE_TRANSPORTER_ACTIVITY	GOMF_PROTON_TRANSMEMBRANE_TRANSPORTER_ACTIVITY		28	-0.375131	-1.19634	0.221116	0.854537	1	531	tags=39%, list=19%, signal=48%
GOMF_ORGANIC_ANION_TRANSMEMBRANE_TRANSPORTER_ACTIVITY	GOMF_ORGANIC_ANION_TRANSMEMBRANE_TRANSPORTER_ACTIVITY		35	-0.389156	-1.19608	0.139344	0.85136	1	651	tags=31%, list=24%, signal=41%
GOBP_POSITIVE_REGULATION_OF_PEPTIDASE_ACTIVITY	GOBP_POSITIVE_REGULATION_OF_PEPTIDASE_ACTIVITY		41	-0.31269	-1.196	0.196464	0.847348	1	692	tags=37%, list=25%, signal=48%
GOBP_REGULATION_OF_PROTEIN_LOCALIZATION_TO_CELL_PERIPHERY	GOBP_REGULATION_OF_PROTEIN_LOCALIZATION_TO_CELL_PERIPHERY		30	-0.367341	-1.19467	0.227273	0.848452	1	325	tags=23%, list=12%, signal=26%
GOBP_POSITIVE_REGULATION_OF_PROTEIN_KINASE_B_SIGNALING	GOBP_POSITIVE_REGULATION_OF_PROTEIN_KINASE_B_SIGNALING		41	-0.385764	-1.19294	0.155378	0.851484	1	435	tags=27%, list=16%, signal=31%
GOBP_REGULATION_OF_INSULIN_RECEPTOR_SIGNALING_PATHWAY	GOBP_REGULATION_OF_INSULIN_RECEPTOR_SIGNALING_PATHWAY		18	-0.409943	-1.19284	0.256705	0.84761	1	450	tags=33%, list=17%, signal=40%
GOBP_REGULATION_OF_GROWTH	GOBP_REGULATION_OF_GROWTH		146	-0.28138	-1.19174	0.114719	0.848088	1	457	tags=21%, list=17%, signal=24%
GOBP_NEGATIVE_REGULATION_OF_RESPONSE_TO_EXTERNAL_STIMULUS	GOBP_NEGATIVE_REGULATION_OF_RESPONSE_TO_EXTERNAL_STIMULUS		71	-0.322985	-1.19168	0.204322	0.844154	1	608	tags=34%, list=22%, signal=42%
GOBP_SMALL_MOLECULE_METABOLIC_PROCESS	GOBP_SMALL_MOLECULE_METABOLIC_PROCESS		334	-0.267331	-1.19078	0.0882957	0.843679	1	530	tags=26%, list=19%, signal=29%
GOBP_REGULATION_OF_TRANS_SYNAPTIC_SIGNALING	GOBP_REGULATION_OF_TRANS_SYNAPTIC_SIGNALING		93	-0.291663	-1.19046	0.166667	0.840718	1	791	tags=39%, list=29%, signal=53%
GOCC_CATALYTIC_COMPLEX	GOCC_CATALYTIC_COMPLEX		263	-0.255727	-1.18641	0.190574	0.853367	1	262	tags=13%, list=10%, signal=13%
GOBP_INTRINSIC_APOPTOTIC_SIGNALING_PATHWAY_IN_RESPONSE_TO_ENDOPLASMIC_RETICULUM_STRESS	GOBP_INTRINSIC_APOPTOTIC_SIGNALING_PATHWAY_IN_RESPONSE_TO_ENDOPLASMIC_RETICULUM_STRESS		15	-0.377853	-1.18482	0.227557	0.855639	1	321	tags=27%, list=12%, signal=30%
GOBP_LIPID_METABOLIC_PROCESS	GOBP_LIPID_METABOLIC_PROCESS		227	-0.275552	-1.18257	0.0752896	0.860622	1	553	tags=26%, list=20%, signal=29%
GOBP_DETECTION_OF_ABIOTIC_STIMULUS	GOBP_DETECTION_OF_ABIOTIC_STIMULUS		27	-0.392381	-1.18247	0.192547	0.856922	1	83	tags=15%, list=3%, signal=15%
GOBP_REGULATION_OF_COAGULATION	GOBP_REGULATION_OF_COAGULATION		15	-0.438772	-1.18242	0.271484	0.853061	1	409	tags=27%, list=15%, signal=31%
GOMF_SNARE_BINDING	GOMF_SNARE_BINDING		23	-0.354714	-1.18206	0.230769	0.850493	1	471	tags=30%, list=17%, signal=36%
GOBP_SIGNAL_TRANSDUCTION_INVOLVED_IN_CELL_CYCLE_CHECKPOINT	GOBP_SIGNAL_TRANSDUCTION_INVOLVED_IN_CELL_CYCLE_CHECKPOINT		15	-0.471519	-1.18195	0.219316	0.846986	1	342	tags=47%, list=13%, signal=53%
GOBP_ACUTE_INFLAMMATORY_RESPONSE	GOBP_ACUTE_INFLAMMATORY_RESPONSE		18	-0.427085	-1.17808	0.255578	0.858807	1	917	tags=67%, list=34%, signal=100%
GOCC_BASAL_PART_OF_CELL	GOCC_BASAL_PART_OF_CELL		65	-0.321144	-1.17516	0.142574	0.866893	1	516	tags=23%, list=19%, signal=28%
GOBP_NEGATIVE_REGULATION_OF_NEURON_APOPTOTIC_PROCESS	GOBP_NEGATIVE_REGULATION_OF_NEURON_APOPTOTIC_PROCESS		23	-0.405781	-1.17251	0.287938	0.873617	1	358	tags=26%, list=13%, signal=30%
GOBP_REGULATION_OF_PHOSPHATIDYLINOSITOL_3_KINASE_SIGNALING	GOBP_REGULATION_OF_PHOSPHATIDYLINOSITOL_3_KINASE_SIGNALING		34	-0.367627	-1.17232	0.205179	0.870377	1	227	tags=24%, list=8%, signal=25%
GOBP_REGULATION_OF_DENDRITIC_SPINE_MORPHOGENESIS	GOBP_REGULATION_OF_DENDRITIC_SPINE_MORPHOGENESIS		15	-0.441106	-1.17165	0.231969	0.869089	1	573	tags=33%, list=21%, signal=42%
GOMF_PHOSPHATIDYLINOSITOL_PHOSPHATE_BINDING	GOMF_PHOSPHATIDYLINOSITOL_PHOSPHATE_BINDING		31	-0.369634	-1.17055	0.211045	0.869756	1	414	tags=35%, list=15%, signal=41%
GOBP_EMBRYONIC_DIGIT_MORPHOGENESIS	GOBP_EMBRYONIC_DIGIT_MORPHOGENESIS		15	-0.444814	-1.16965	0.295938	0.869644	1	578	tags=33%, list=21%, signal=42%
GOMF_PROTEIN_MACROMOLECULE_ADAPTOR_ACTIVITY	GOMF_PROTEIN_MACROMOLECULE_ADAPTOR_ACTIVITY		60	-0.295623	-1.1695	0.186047	0.866211	1	395	tags=23%, list=15%, signal=27%
GOBP_REGULATION_OF_EXOCYTOSIS	GOBP_REGULATION_OF_EXOCYTOSIS		51	-0.325423	-1.16729	0.187621	0.871345	1	471	tags=29%, list=17%, signal=35%
GOBP_POSITIVE_REGULATION_OF_PROTEOLYSIS	GOBP_POSITIVE_REGULATION_OF_PROTEOLYSIS		78	-0.275226	-1.16651	0.207171	0.870478	1	338	tags=21%, list=12%, signal=23%
GOBP_REGULATION_OF_GENERATION_OF_PRECURSOR_METABOLITES_AND_ENERGY	GOBP_REGULATION_OF_GENERATION_OF_PRECURSOR_METABOLITES_AND_ENERGY		44	-0.338537	-1.16581	0.228846	0.869429	1	133	tags=16%, list=5%, signal=16%
GOBP_CELLULAR_CARBOHYDRATE_BIOSYNTHETIC_PROCESS	GOBP_CELLULAR_CARBOHYDRATE_BIOSYNTHETIC_PROCESS		20	-0.391609	-1.16464	0.246	0.869979	1	452	tags=35%, list=17%, signal=42%
GOBP_PROTEIN_LOCALIZATION_TO_CELL_PERIPHERY	GOBP_PROTEIN_LOCALIZATION_TO_CELL_PERIPHERY		80	-0.277315	-1.16413	0.203125	0.868285	1	327	tags=19%, list=12%, signal=21%
GOCC_EXTERNAL_SIDE_OF_PLASMA_MEMBRANE	GOCC_EXTERNAL_SIDE_OF_PLASMA_MEMBRANE		68	-0.330661	-1.16347	0.167331	0.867117	1	26	tags=7%, list=1%, signal=7%
GOBP_CALCIUM_ION_TRANSPORT	GOBP_CALCIUM_ION_TRANSPORT		78	-0.292292	-1.16312	0.191983	0.864682	1	659	tags=35%, list=24%, signal=44%
GOBP_POSITIVE_REGULATION_OF_SYNAPTIC_TRANSMISSION	GOBP_POSITIVE_REGULATION_OF_SYNAPTIC_TRANSMISSION		36	-0.322849	-1.1624	0.253411	0.86381	1	785	tags=36%, list=29%, signal=50%
GOCC_BASOLATERAL_PLASMA_MEMBRANE	GOCC_BASOLATERAL_PLASMA_MEMBRANE		48	-0.330956	-1.16042	0.178641	0.86844	1	275	tags=13%, list=10%, signal=14%
GOBP_ORGANOPHOSPHATE_METABOLIC_PROCESS	GOBP_ORGANOPHOSPHATE_METABOLIC_PROCESS		196	-0.275091	-1.15881	0.142562	0.871221	1	310	tags=17%, list=11%, signal=18%
GOBP_POSITIVE_REGULATION_OF_T_CELL_PROLIFERATION	GOBP_POSITIVE_REGULATION_OF_T_CELL_PROLIFERATION		16	-0.444938	-1.15788	0.259794	0.871335	1	231	tags=25%, list=8%, signal=27%
GOBP_REGULATION_OF_TRANSFERASE_ACTIVITY	GOBP_REGULATION_OF_TRANSFERASE_ACTIVITY		222	-0.256344	-1.15504	0.167331	0.87885	1	524	tags=22%, list=19%, signal=25%
GOBP_NEGATIVE_REGULATION_OF_GROWTH	GOBP_NEGATIVE_REGULATION_OF_GROWTH		59	-0.308667	-1.15472	0.211268	0.876464	1	407	tags=22%, list=15%, signal=25%
GOBP_METENCEPHALON_DEVELOPMENT	GOBP_METENCEPHALON_DEVELOPMENT		22	-0.389002	-1.15336	0.307385	0.878134	1	725	tags=41%, list=27%, signal=55%
GOMF_PHOSPHORIC_ESTER_HYDROLASE_ACTIVITY	GOMF_PHOSPHORIC_ESTER_HYDROLASE_ACTIVITY		77	-0.300234	-1.15309	0.136268	0.875565	1	626	tags=29%, list=23%, signal=36%
GOBP_BIOMINERALIZATION	GOBP_BIOMINERALIZATION		34	-0.366209	-1.14921	0.220648	0.887545	1	492	tags=35%, list=18%, signal=43%
GOBP_CARBOHYDRATE_TRANSPORT	GOBP_CARBOHYDRATE_TRANSPORT		32	-0.403569	-1.14789	0.237603	0.88916	1	43	tags=13%, list=2%, signal=13%
GOBP_POSITIVE_REGULATION_OF_SMALL_GTPASE_MEDIATED_SIGNAL_TRANSDUCTION	GOBP_POSITIVE_REGULATION_OF_SMALL_GTPASE_MEDIATED_SIGNAL_TRANSDUCTION		19	-0.413523	-1.14659	0.277228	0.890722	1	457	tags=32%, list=17%, signal=38%
GOBP_RIBOSE_PHOSPHATE_BIOSYNTHETIC_PROCESS	GOBP_RIBOSE_PHOSPHATE_BIOSYNTHETIC_PROCESS		27	-0.385945	-1.14576	0.251521	0.890342	1	365	tags=30%, list=13%, signal=34%
GOMF_RIBONUCLEOPROTEIN_COMPLEX_BINDING	GOMF_RIBONUCLEOPROTEIN_COMPLEX_BINDING		19	-0.354844	-1.14484	0.29505	0.890624	1	68	tags=11%, list=2%, signal=11%
GOBP_EXOCYTIC_PROCESS	GOBP_EXOCYTIC_PROCESS		18	-0.388538	-1.14451	0.262605	0.88819	1	471	tags=22%, list=17%, signal=27%
GOBP_PROTEIN_CONTAINING_COMPLEX_SUBUNIT_ORGANIZATION	GOBP_PROTEIN_CONTAINING_COMPLEX_SUBUNIT_ORGANIZATION		348	-0.221594	-1.14364	0.136905	0.888126	1	488	tags=22%, list=18%, signal=23%
GOBP_BIOLOGICAL_PROCESS_INVOLVED_IN_INTRASPECIES_INTERACTION_BETWEEN_ORGANISMS	GOBP_BIOLOGICAL_PROCESS_INVOLVED_IN_INTRASPECIES_INTERACTION_BETWEEN_ORGANISMS		15	-0.409838	-1.14348	0.287594	0.885142	1	568	tags=33%, list=21%, signal=42%
GOBP_REGULATION_OF_PEPTIDASE_ACTIVITY	GOBP_REGULATION_OF_PEPTIDASE_ACTIVITY		74	-0.282925	-1.14025	0.224528	0.894787	1	776	tags=39%, list=28%, signal=53%
GOBP_CELLULAR_RESPONSE_TO_CHEMICAL_STRESS	GOBP_CELLULAR_RESPONSE_TO_CHEMICAL_STRESS		72	-0.29538	-1.13994	0.212245	0.892373	1	321	tags=17%, list=12%, signal=18%
GOBP_POSITIVE_REGULATION_OF_STRESS_ACTIVATED_PROTEIN_KINASE_SIGNALING_CASCADE	GOBP_POSITIVE_REGULATION_OF_STRESS_ACTIVATED_PROTEIN_KINASE_SIGNALING_CASCADE		21	-0.387308	-1.1397	0.263566	0.889816	1	217	tags=14%, list=8%, signal=15%
GOMF_RECEPTOR_TYROSINE_KINASE_BINDING	GOMF_RECEPTOR_TYROSINE_KINASE_BINDING		19	-0.398303	-1.13817	0.273423	0.892452	1	231	tags=26%, list=8%, signal=29%
GOBP_POSITIVE_REGULATION_OF_PROTEIN_PHOSPHORYLATION	GOBP_POSITIVE_REGULATION_OF_PROTEIN_PHOSPHORYLATION		172	-0.261716	-1.13787	0.185111	0.890041	1	635	tags=27%, list=23%, signal=33%
GOBP_VASCULAR_ENDOTHELIAL_GROWTH_FACTOR_RECEPTOR_SIGNALING_PATHWAY	GOBP_VASCULAR_ENDOTHELIAL_GROWTH_FACTOR_RECEPTOR_SIGNALING_PATHWAY		24	-0.38099	-1.13519	0.28252	0.897699	1	231	tags=21%, list=8%, signal=23%
GOBP_CELLULAR_AMINO_ACID_BIOSYNTHETIC_PROCESS	GOBP_CELLULAR_AMINO_ACID_BIOSYNTHETIC_PROCESS		18	-0.413391	-1.13461	0.285714	0.896506	1	662	tags=50%, list=24%, signal=66%
GOBP_CELLULAR_MODIFIED_AMINO_ACID_METABOLIC_PROCESS	GOBP_CELLULAR_MODIFIED_AMINO_ACID_METABOLIC_PROCESS		31	-0.388299	-1.13356	0.27789	0.897163	1	130	tags=19%, list=5%, signal=20%
GOMF_NUCLEASE_ACTIVITY	GOMF_NUCLEASE_ACTIVITY		31	-0.354179	-1.13338	0.266525	0.894347	1	305	tags=19%, list=11%, signal=22%
GOBP_CAMP_MEDIATED_SIGNALING	GOBP_CAMP_MEDIATED_SIGNALING		18	-0.374019	-1.13261	0.296435	0.893984	1	473	tags=28%, list=17%, signal=33%
GOBP_ACTIVATION_OF_CYSTEINE_TYPE_ENDOPEPTIDASE_ACTIVITY_INVOLVED_IN_APOPTOTIC_PROCESS	GOBP_ACTIVATION_OF_CYSTEINE_TYPE_ENDOPEPTIDASE_ACTIVITY_INVOLVED_IN_APOPTOTIC_PROCESS		23	-0.363275	-1.13235	0.273946	0.89151	1	321	tags=26%, list=12%, signal=29%
GOMF_SOLUTE_SODIUM_SYMPORTER_ACTIVITY	GOMF_SOLUTE_SODIUM_SYMPORTER_ACTIVITY		21	-0.438216	-1.12868	0.279835	0.902789	1	87	tags=10%, list=3%, signal=10%
GOMF_FLAVIN_ADENINE_DINUCLEOTIDE_BINDING	GOMF_FLAVIN_ADENINE_DINUCLEOTIDE_BINDING		20	-0.41391	-1.12818	0.298283	0.901314	1	207	tags=25%, list=8%, signal=27%
GOBP_NEGATIVE_REGULATION_OF_WOUND_HEALING	GOBP_NEGATIVE_REGULATION_OF_WOUND_HEALING		17	-0.398883	-1.12744	0.303462	0.900911	1	409	tags=24%, list=15%, signal=28%
GOBP_ORGANIC_ACID_TRANSPORT	GOBP_ORGANIC_ACID_TRANSPORT		65	-0.317781	-1.12696	0.245136	0.899406	1	494	tags=20%, list=18%, signal=24%
GOBP_CILIUM_MOVEMENT	GOBP_CILIUM_MOVEMENT		17	-0.417921	-1.12534	0.309572	0.902394	1	129	tags=18%, list=5%, signal=18%
GOBP_REGULATION_OF_NEUROTRANSMITTER_TRANSPORT	GOBP_REGULATION_OF_NEUROTRANSMITTER_TRANSPORT		25	-0.370874	-1.12513	0.278656	0.899779	1	628	tags=32%, list=23%, signal=41%
GOBP_REGULATION_OF_RESPONSE_TO_OXIDATIVE_STRESS	GOBP_REGULATION_OF_RESPONSE_TO_OXIDATIVE_STRESS		18	-0.368541	-1.12196	0.294118	0.909313	1	66	tags=11%, list=2%, signal=11%
GOBP_NEGATIVE_REGULATION_OF_APOPTOTIC_SIGNALING_PATHWAY	GOBP_NEGATIVE_REGULATION_OF_APOPTOTIC_SIGNALING_PATHWAY		46	-0.310568	-1.12088	0.3	0.91039	1	285	tags=17%, list=10%, signal=19%
GOBP_NEUROTRANSMITTER_SECRETION	GOBP_NEUROTRANSMITTER_SECRETION		37	-0.325376	-1.12073	0.262452	0.907565	1	861	tags=38%, list=32%, signal=55%
GOBP_POSITIVE_REGULATION_OF_CELLULAR_CARBOHYDRATE_METABOLIC_PROCESS	GOBP_POSITIVE_REGULATION_OF_CELLULAR_CARBOHYDRATE_METABOLIC_PROCESS		15	-0.429706	-1.12055	0.319756	0.904888	1	43	tags=13%, list=2%, signal=13%
GOCC_TRANSFERASE_COMPLEX	GOCC_TRANSFERASE_COMPLEX		143	-0.267535	-1.11999	0.271255	0.903747	1	105	tags=8%, list=4%, signal=8%
GOBP_RNA_MODIFICATION	GOBP_RNA_MODIFICATION		15	-0.374809	-1.11997	0.332677	0.900448	1	435	tags=33%, list=16%, signal=39%
GOBP_NEGATIVE_REGULATION_OF_INFLAMMATORY_RESPONSE	GOBP_NEGATIVE_REGULATION_OF_INFLAMMATORY_RESPONSE		21	-0.39108	-1.11988	0.302789	0.897418	1	551	tags=33%, list=20%, signal=41%
GOBP_NEGATIVE_REGULATION_OF_PROTEIN_MODIFICATION_BY_SMALL_PROTEIN_CONJUGATION_OR_REMOVAL	GOBP_NEGATIVE_REGULATION_OF_PROTEIN_MODIFICATION_BY_SMALL_PROTEIN_CONJUGATION_OR_REMOVAL		21	-0.363896	-1.1196	0.310638	0.895215	1	59	tags=14%, list=2%, signal=14%
GOBP_GLUCOSE_METABOLIC_PROCESS	GOBP_GLUCOSE_METABOLIC_PROCESS		49	-0.347993	-1.11881	0.295409	0.895151	1	145	tags=18%, list=5%, signal=19%
GOBP_NEGATIVE_REGULATION_OF_NEURON_DEATH	GOBP_NEGATIVE_REGULATION_OF_NEURON_DEATH		32	-0.347522	-1.11786	0.32549	0.895695	1	365	tags=25%, list=13%, signal=29%
GOCC_EXTRINSIC_COMPONENT_OF_PLASMA_MEMBRANE	GOCC_EXTRINSIC_COMPONENT_OF_PLASMA_MEMBRANE		37	-0.341633	-1.1178	0.274254	0.892617	1	415	tags=24%, list=15%, signal=28%
GOBP_ARTERY_MORPHOGENESIS	GOBP_ARTERY_MORPHOGENESIS		21	-0.391427	-1.11758	0.309278	0.890217	1	499	tags=29%, list=18%, signal=35%
GOBP_CELL_GROWTH	GOBP_CELL_GROWTH		102	-0.278726	-1.11643	0.248473	0.891794	1	400	tags=20%, list=15%, signal=22%
GOMF_ENDONUCLEASE_ACTIVITY	GOMF_ENDONUCLEASE_ACTIVITY		21	-0.396829	-1.11626	0.310559	0.889179	1	228	tags=19%, list=8%, signal=21%
GOCC_SIDE_OF_MEMBRANE	GOCC_SIDE_OF_MEMBRANE		118	-0.288916	-1.11553	0.209256	0.888967	1	209	tags=11%, list=8%, signal=11%
GOBP_POLYSACCHARIDE_BIOSYNTHETIC_PROCESS	GOBP_POLYSACCHARIDE_BIOSYNTHETIC_PROCESS		20	-0.372555	-1.11381	0.324803	0.892394	1	429	tags=30%, list=16%, signal=35%
GOMF_TRANSLATION_REGULATOR_ACTIVITY	GOMF_TRANSLATION_REGULATOR_ACTIVITY		27	-0.305958	-1.10998	0.324597	0.904413	1	276	tags=22%, list=10%, signal=24%
GOBP_CIRCULATORY_SYSTEM_PROCESS	GOBP_CIRCULATORY_SYSTEM_PROCESS		149	-0.269551	-1.10831	0.229839	0.907679	1	521	tags=26%, list=19%, signal=31%
GOBP_PROTEIN_KINASE_B_SIGNALING	GOBP_PROTEIN_KINASE_B_SIGNALING		59	-0.332388	-1.10744	0.258197	0.907832	1	516	tags=25%, list=19%, signal=31%
GOBP_GLANDULAR_EPITHELIAL_CELL_DIFFERENTIATION	GOBP_GLANDULAR_EPITHELIAL_CELL_DIFFERENTIATION		16	-0.428904	-1.1071	0.305389	0.905926	1	457	tags=44%, list=17%, signal=52%
GOBP_PHOSPHOLIPID_BIOSYNTHETIC_PROCESS	GOBP_PHOSPHOLIPID_BIOSYNTHETIC_PROCESS		60	-0.305181	-1.10689	0.274029	0.903527	1	250	tags=15%, list=9%, signal=16%
GOBP_TRANSMEMBRANE_TRANSPORT	GOBP_TRANSMEMBRANE_TRANSPORT		305	-0.23428	-1.10624	0.154902	0.902759	1	667	tags=28%, list=24%, signal=32%
GOBP_FOREBRAIN_DEVELOPMENT	GOBP_FOREBRAIN_DEVELOPMENT		92	-0.282589	-1.10537	0.272189	0.902801	1	641	tags=33%, list=24%, signal=41%
GOBP_VASCULAR_PROCESS_IN_CIRCULATORY_SYSTEM	GOBP_VASCULAR_PROCESS_IN_CIRCULATORY_SYSTEM		72	-0.309192	-1.10474	0.233333	0.902114	1	521	tags=29%, list=19%, signal=35%
GOBP_POSITIVE_REGULATION_OF_CARBOHYDRATE_METABOLIC_PROCESS	GOBP_POSITIVE_REGULATION_OF_CARBOHYDRATE_METABOLIC_PROCESS		26	-0.371941	-1.10146	0.310204	0.911929	1	133	tags=15%, list=5%, signal=16%
GOBP_SMALL_MOLECULE_BIOSYNTHETIC_PROCESS	GOBP_SMALL_MOLECULE_BIOSYNTHETIC_PROCESS		137	-0.271677	-1.10073	0.268859	0.911602	1	597	tags=30%, list=22%, signal=36%
GOBP_INORGANIC_ION_TRANSMEMBRANE_TRANSPORT	GOBP_INORGANIC_ION_TRANSMEMBRANE_TRANSPORT		173	-0.242038	-1.09994	0.230143	0.911546	1	667	tags=31%, list=24%, signal=38%
GOBP_POSITIVE_REGULATION_OF_TRANSFERASE_ACTIVITY	GOBP_POSITIVE_REGULATION_OF_TRANSFERASE_ACTIVITY		157	-0.254365	-1.09811	0.260692	0.915471	1	407	tags=16%, list=15%, signal=18%
GOBP_ORGANIC_HYDROXY_COMPOUND_METABOLIC_PROCESS	GOBP_ORGANIC_HYDROXY_COMPOUND_METABOLIC_PROCESS		102	-0.283854	-1.09794	0.25	0.912971	1	160	tags=14%, list=6%, signal=14%
GOMF_PHOSPHOTYROSINE_RESIDUE_BINDING	GOMF_PHOSPHOTYROSINE_RESIDUE_BINDING		16	-0.392171	-1.09663	0.310621	0.914793	1	198	tags=19%, list=7%, signal=20%
GOMF_LIGASE_ACTIVITY	GOMF_LIGASE_ACTIVITY		20	-0.399238	-1.09251	0.344609	0.928176	1	205	tags=25%, list=8%, signal=27%
GOBP_FC_RECEPTOR_MEDIATED_STIMULATORY_SIGNALING_PATHWAY	GOBP_FC_RECEPTOR_MEDIATED_STIMULATORY_SIGNALING_PATHWAY		27	-0.344703	-1.09219	0.346232	0.926274	1	402	tags=19%, list=15%, signal=22%
GOBP_ENDOPLASMIC_RETICULUM_TO_GOLGI_VESICLE_MEDIATED_TRANSPORT	GOBP_ENDOPLASMIC_RETICULUM_TO_GOLGI_VESICLE_MEDIATED_TRANSPORT		40	-0.280025	-1.09206	0.332024	0.923638	1	993	tags=55%, list=36%, signal=85%
GOBP_CELLULAR_RESPONSE_TO_PEPTIDE	GOBP_CELLULAR_RESPONSE_TO_PEPTIDE		91	-0.265212	-1.09076	0.298625	0.925665	1	504	tags=23%, list=19%, signal=27%
GOBP_RESPONSE_TO_PURINE_CONTAINING_COMPOUND	GOBP_RESPONSE_TO_PURINE_CONTAINING_COMPOUND		27	-0.365405	-1.0894	0.299799	0.927861	1	604	tags=33%, list=22%, signal=42%
GOBP_ORGANIC_HYDROXY_COMPOUND_BIOSYNTHETIC_PROCESS	GOBP_ORGANIC_HYDROXY_COMPOUND_BIOSYNTHETIC_PROCESS		55	-0.316962	-1.08924	0.271222	0.925326	1	553	tags=27%, list=20%, signal=34%
GOBP_RESPONSE_TO_INSULIN	GOBP_RESPONSE_TO_INSULIN		64	-0.296051	-1.08857	0.299611	0.924841	1	450	tags=27%, list=17%, signal=31%
GOBP_NEGATIVE_REGULATION_OF_NERVOUS_SYSTEM_DEVELOPMENT	GOBP_NEGATIVE_REGULATION_OF_NERVOUS_SYSTEM_DEVELOPMENT		31	-0.31079	-1.08821	0.318658	0.923119	1	938	tags=55%, list=34%, signal=83%
GOBP_REGULATION_OF_POSTSYNAPSE_ORGANIZATION	GOBP_REGULATION_OF_POSTSYNAPSE_ORGANIZATION		26	-0.341907	-1.08784	0.325885	0.921605	1	725	tags=35%, list=27%, signal=47%
GOBP_REGULATION_OF_RECEPTOR_SIGNALING_PATHWAY_VIA_STAT	GOBP_REGULATION_OF_RECEPTOR_SIGNALING_PATHWAY_VIA_STAT		18	-0.392165	-1.08728	0.28629	0.920839	1	580	tags=39%, list=21%, signal=49%
GOBP_POSITIVE_REGULATION_OF_TRANSMEMBRANE_TRANSPORT	GOBP_POSITIVE_REGULATION_OF_TRANSMEMBRANE_TRANSPORT		43	-0.293228	-1.08345	0.313373	0.932886	1	777	tags=35%, list=29%, signal=48%
GOBP_PROTEIN_COMPLEX_OLIGOMERIZATION	GOBP_PROTEIN_COMPLEX_OLIGOMERIZATION		45	-0.296976	-1.08247	0.316973	0.93343	1	478	tags=24%, list=18%, signal=29%
GOBP_NEGATIVE_REGULATION_OF_ERBB_SIGNALING_PATHWAY	GOBP_NEGATIVE_REGULATION_OF_ERBB_SIGNALING_PATHWAY		23	-0.316486	-1.08242	0.37037	0.930578	1	165	tags=17%, list=6%, signal=18%
GOBP_MEIOSIS_I_CELL_CYCLE_PROCESS	GOBP_MEIOSIS_I_CELL_CYCLE_PROCESS		16	-0.412704	-1.08147	0.383795	0.931073	1	188	tags=13%, list=7%, signal=13%
GOMF_CATION_TRANSMEMBRANE_TRANSPORTER_ACTIVITY	GOMF_CATION_TRANSMEMBRANE_TRANSPORTER_ACTIVITY		144	-0.258657	-1.08051	0.256513	0.931855	1	663	tags=31%, list=24%, signal=38%
GOBP_CATION_TRANSMEMBRANE_TRANSPORT	GOBP_CATION_TRANSMEMBRANE_TRANSPORT		175	-0.237717	-1.0805	0.258824	0.928825	1	659	tags=30%, list=24%, signal=37%
GOMF_HORMONE_RECEPTOR_BINDING	GOMF_HORMONE_RECEPTOR_BINDING		39	-0.301476	-1.07921	0.347826	0.930966	1	131	tags=8%, list=5%, signal=8%
GOBP_COLUMNAR_CUBOIDAL_EPITHELIAL_CELL_DIFFERENTIATION	GOBP_COLUMNAR_CUBOIDAL_EPITHELIAL_CELL_DIFFERENTIATION		23	-0.360973	-1.07862	0.331313	0.930313	1	457	tags=35%, list=17%, signal=41%
GOBP_WATER_SOLUBLE_VITAMIN_METABOLIC_PROCESS	GOBP_WATER_SOLUBLE_VITAMIN_METABOLIC_PROCESS		17	-0.348988	-1.07623	0.355159	0.936845	1	512	tags=35%, list=19%, signal=43%
GOBP_CARBOHYDRATE_BIOSYNTHETIC_PROCESS	GOBP_CARBOHYDRATE_BIOSYNTHETIC_PROCESS		44	-0.307964	-1.07529	0.33	0.937496	1	452	tags=25%, list=17%, signal=29%
GOBP_ARTERY_DEVELOPMENT	GOBP_ARTERY_DEVELOPMENT		26	-0.350293	-1.07508	0.358051	0.935242	1	499	tags=27%, list=18%, signal=33%
GOBP_NEGATIVE_REGULATION_OF_PROTEIN_BINDING	GOBP_NEGATIVE_REGULATION_OF_PROTEIN_BINDING		28	-0.369425	-1.07505	0.375746	0.932415	1	365	tags=21%, list=13%, signal=24%
GOBP_REGULATION_OF_CARDIAC_CONDUCTION	GOBP_REGULATION_OF_CARDIAC_CONDUCTION		16	-0.378504	-1.07295	0.37911	0.937731	1	777	tags=44%, list=29%, signal=61%
GOBP_PROTEIN_FOLDING	GOBP_PROTEIN_FOLDING		42	-0.268223	-1.07196	0.368764	0.938512	1	715	tags=38%, list=26%, signal=51%
GOBP_OLIGODENDROCYTE_DIFFERENTIATION	GOBP_OLIGODENDROCYTE_DIFFERENTIATION		22	-0.333923	-1.07102	0.341463	0.939129	1	556	tags=36%, list=20%, signal=45%
GOBP_REGULATION_OF_PROTEASOMAL_UBIQUITIN_DEPENDENT_PROTEIN_CATABOLIC_PROCESS	GOBP_REGULATION_OF_PROTEASOMAL_UBIQUITIN_DEPENDENT_PROTEIN_CATABOLIC_PROCESS		33	-0.29626	-1.07075	0.371197	0.937162	1	338	tags=21%, list=12%, signal=24%
GOBP_REGULATION_OF_CELLULAR_CATABOLIC_PROCESS	GOBP_REGULATION_OF_CELLULAR_CATABOLIC_PROCESS		192	-0.212693	-1.06991	0.298651	0.937445	1	380	tags=16%, list=14%, signal=17%
GOBP_PURINE_CONTAINING_COMPOUND_BIOSYNTHETIC_PROCESS	GOBP_PURINE_CONTAINING_COMPOUND_BIOSYNTHETIC_PROCESS		32	-0.345606	-1.06966	0.366534	0.935487	1	365	tags=25%, list=13%, signal=29%
GOMF_CALCIUM_ION_TRANSMEMBRANE_TRANSPORTER_ACTIVITY	GOMF_CALCIUM_ION_TRANSMEMBRANE_TRANSPORTER_ACTIVITY		39	-0.315506	-1.06813	0.340249	0.938313	1	777	tags=44%, list=29%, signal=60%
GOBP_POSITIVE_REGULATION_OF_ENDOTHELIAL_CELL_PROLIFERATION	GOBP_POSITIVE_REGULATION_OF_ENDOTHELIAL_CELL_PROLIFERATION		19	-0.37519	-1.06748	0.371197	0.937919	1	241	tags=21%, list=9%, signal=23%
GOCC_LAMELLIPODIUM	GOCC_LAMELLIPODIUM		49	-0.322324	-1.06557	0.356164	0.942527	1	682	tags=35%, list=25%, signal=45%
GOMF_PHOSPHATASE_BINDING	GOMF_PHOSPHATASE_BINDING		45	-0.309636	-1.06267	0.34749	0.950761	1	621	tags=29%, list=23%, signal=37%
GOBP_PHOSPHATIDYLINOSITOL_BIOSYNTHETIC_PROCESS	GOBP_PHOSPHATIDYLINOSITOL_BIOSYNTHETIC_PROCESS		30	-0.351621	-1.0622	0.371486	0.949734	1	250	tags=20%, list=9%, signal=22%
GOBP_REGULATION_OF_MACROAUTOPHAGY	GOBP_REGULATION_OF_MACROAUTOPHAGY		31	-0.340386	-1.06135	0.360248	0.949973	1	376	tags=26%, list=14%, signal=30%
GOBP_CELL_CYCLE_CHECKPOINT	GOBP_CELL_CYCLE_CHECKPOINT		39	-0.317989	-1.06021	0.355556	0.951344	1	342	tags=28%, list=13%, signal=32%
GOBP_SCF_DEPENDENT_PROTEASOMAL_UBIQUITIN_DEPENDENT_PROTEIN_CATABOLIC_PROCESS	GOBP_SCF_DEPENDENT_PROTEASOMAL_UBIQUITIN_DEPENDENT_PROTEIN_CATABOLIC_PROCESS		19	-0.363895	-1.05924	0.397177	0.95218	1	812	tags=42%, list=30%, signal=60%
GOBP_SINGLE_FERTILIZATION	GOBP_SINGLE_FERTILIZATION		22	-0.342126	-1.05583	0.381226	0.962516	1	882	tags=45%, list=32%, signal=67%
GOBP_GERM_CELL_DEVELOPMENT	GOBP_GERM_CELL_DEVELOPMENT		40	-0.311126	-1.05514	0.364706	0.962287	1	162	tags=15%, list=6%, signal=16%
GOBP_APOPTOTIC_PROCESS	GOBP_APOPTOTIC_PROCESS		394	-0.219155	-1.05462	0.308765	0.961362	1	461	tags=19%, list=17%, signal=19%
GOBP_RESPONSE_TO_OXIDATIVE_STRESS	GOBP_RESPONSE_TO_OXIDATIVE_STRESS		88	-0.258214	-1.05348	0.336756	0.962796	1	321	tags=15%, list=12%, signal=16%
GOBP_NEGATIVE_REGULATION_OF_CATALYTIC_ACTIVITY	GOBP_NEGATIVE_REGULATION_OF_CATALYTIC_ACTIVITY		125	-0.24382	-1.05348	0.342466	0.959896	1	492	tags=24%, list=18%, signal=28%
GOBP_REGULATION_OF_NEUROTRANSMITTER_LEVELS	GOBP_REGULATION_OF_NEUROTRANSMITTER_LEVELS		55	-0.286184	-1.05182	0.340344	0.963457	1	325	tags=11%, list=12%, signal=12%
GOBP_CARBOHYDRATE_METABOLIC_PROCESS	GOBP_CARBOHYDRATE_METABOLIC_PROCESS		128	-0.262165	-1.04939	0.353061	0.969869	1	149	tags=13%, list=5%, signal=13%
GOBP_ACTIVATION_OF_MAPK_ACTIVITY	GOBP_ACTIVATION_OF_MAPK_ACTIVITY		30	-0.342814	-1.04803	0.390756	0.972442	1	214	tags=13%, list=8%, signal=14%
GOBP_RESPONSE_TO_HEAT	GOBP_RESPONSE_TO_HEAT		37	-0.295291	-1.04663	0.396304	0.974989	1	359	tags=24%, list=13%, signal=28%
GOCC_9PLUS0_NON_MOTILE_CILIUM	GOCC_9PLUS0_NON_MOTILE_CILIUM		16	-0.438445	-1.04533	0.392996	0.976999	1	154	tags=19%, list=6%, signal=20%
GOBP_NCRNA_METABOLIC_PROCESS	GOBP_NCRNA_METABOLIC_PROCESS		61	-0.246752	-1.04491	0.376016	0.975775	1	268	tags=16%, list=10%, signal=18%
GOMF_REPRESSING_TRANSCRIPTION_FACTOR_BINDING	GOMF_REPRESSING_TRANSCRIPTION_FACTOR_BINDING		28	-0.307183	-1.04458	0.405405	0.974182	1	365	tags=21%, list=13%, signal=24%
GOMF_CARBON_OXYGEN_LYASE_ACTIVITY	GOMF_CARBON_OXYGEN_LYASE_ACTIVITY		15	-0.36714	-1.04451	0.423695	0.971549	1	597	tags=40%, list=22%, signal=51%
GOBP_POSITIVE_REGULATION_OF_CATABOLIC_PROCESS	GOBP_POSITIVE_REGULATION_OF_CATABOLIC_PROCESS		96	-0.251353	-1.04437	0.362573	0.969297	1	380	tags=18%, list=14%, signal=20%
GOBP_MONOCARBOXYLIC_ACID_METABOLIC_PROCESS	GOBP_MONOCARBOXYLIC_ACID_METABOLIC_PROCESS		110	-0.261623	-1.04427	0.339394	0.966854	1	150	tags=15%, list=6%, signal=16%
GOBP_REGULATION_OF_PROTEIN_LOCALIZATION_TO_PLASMA_MEMBRANE	GOBP_REGULATION_OF_PROTEIN_LOCALIZATION_TO_PLASMA_MEMBRANE		21	-0.345866	-1.04416	0.396341	0.964436	1	297	tags=24%, list=11%, signal=27%
GOBP_REGULATION_OF_CELLULAR_KETONE_METABOLIC_PROCESS	GOBP_REGULATION_OF_CELLULAR_KETONE_METABOLIC_PROCESS		40	-0.332154	-1.04333	0.392996	0.964923	1	392	tags=23%, list=14%, signal=26%
GOBP_REGULATION_OF_POLYSACCHARIDE_METABOLIC_PROCESS	GOBP_REGULATION_OF_POLYSACCHARIDE_METABOLIC_PROCESS		16	-0.375539	-1.04222	0.410506	0.966379	1	43	tags=13%, list=2%, signal=13%
GOMF_TRANSFERASE_ACTIVITY_TRANSFERRING_PHOSPHORUS_CONTAINING_GROUPS	GOMF_TRANSFERASE_ACTIVITY_TRANSFERRING_PHOSPHORUS_CONTAINING_GROUPS		209	-0.238464	-1.04153	0.375258	0.966207	1	602	tags=30%, list=22%, signal=35%
GOBP_DNA_INTEGRITY_CHECKPOINT	GOBP_DNA_INTEGRITY_CHECKPOINT		27	-0.347635	-1.04134	0.402697	0.964098	1	342	tags=30%, list=13%, signal=34%
GOBP_ANATOMICAL_STRUCTURE_MATURATION	GOBP_ANATOMICAL_STRUCTURE_MATURATION		35	-0.308471	-1.04011	0.358607	0.966112	1	611	tags=29%, list=22%, signal=36%
GOBP_POSITIVE_REGULATION_OF_OSTEOBLAST_DIFFERENTIATION	GOBP_POSITIVE_REGULATION_OF_OSTEOBLAST_DIFFERENTIATION		20	-0.388606	-1.03988	0.399598	0.964213	1	174	tags=25%, list=6%, signal=27%
GOMF_ANION_TRANSMEMBRANE_TRANSPORTER_ACTIVITY	GOMF_ANION_TRANSMEMBRANE_TRANSPORTER_ACTIVITY		89	-0.281709	-1.03862	0.38189	0.96622	1	596	tags=26%, list=22%, signal=32%
GOBP_CELLULAR_RESPONSE_TO_CARBOHYDRATE_STIMULUS	GOBP_CELLULAR_RESPONSE_TO_CARBOHYDRATE_STIMULUS		28	-0.348655	-1.03828	0.426804	0.964714	1	474	tags=25%, list=17%, signal=30%
GOMF_PROTEIN_TYROSINE_KINASE_BINDING	GOMF_PROTEIN_TYROSINE_KINASE_BINDING		28	-0.33464	-1.03274	0.416667	0.982734	1	231	tags=21%, list=8%, signal=23%
GOBP_INTERLEUKIN_1_PRODUCTION	GOBP_INTERLEUKIN_1_PRODUCTION		17	-0.404065	-1.03266	0.399618	0.980267	1	456	tags=35%, list=17%, signal=42%
GOBP_ER_NUCLEUS_SIGNALING_PATHWAY	GOBP_ER_NUCLEUS_SIGNALING_PATHWAY		16	-0.335656	-1.03169	0.389328	0.981178	1	994	tags=63%, list=36%, signal=98%
GOMF_ION_TRANSMEMBRANE_TRANSPORTER_ACTIVITY	GOMF_ION_TRANSMEMBRANE_TRANSPORTER_ACTIVITY		198	-0.237519	-1.0314	0.346076	0.979613	1	667	tags=30%, list=24%, signal=37%
GOBP_ORGANELLE_DISASSEMBLY	GOBP_ORGANELLE_DISASSEMBLY		16	-0.322807	-1.02911	0.4	0.985624	1	100	tags=13%, list=4%, signal=13%
GOBP_RESPONSE_TO_PEPTIDE	GOBP_RESPONSE_TO_PEPTIDE		119	-0.249265	-1.02718	0.386275	0.990241	1	393	tags=19%, list=14%, signal=22%
GOBP_VASOCONSTRICTION	GOBP_VASOCONSTRICTION		22	-0.357255	-1.02654	0.407407	0.98996	1	517	tags=32%, list=19%, signal=39%
GOBP_PROTEIN_LOCALIZATION_TO_MEMBRANE	GOBP_PROTEIN_LOCALIZATION_TO_MEMBRANE		153	-0.197717	-1.02564	0.438247	0.990805	1	524	tags=20%, list=19%, signal=23%
GOMF_ION_CHANNEL_REGULATOR_ACTIVITY	GOMF_ION_CHANNEL_REGULATOR_ACTIVITY		22	-0.329147	-1.02321	0.413174	0.997675	1	604	tags=41%, list=22%, signal=52%
GOBP_REGULATION_OF_NEURON_PROJECTION_DEVELOPMENT	GOBP_REGULATION_OF_NEURON_PROJECTION_DEVELOPMENT		107	-0.238663	-1.02284	0.392857	0.996365	1	400	tags=21%, list=15%, signal=23%
GOBP_PROTEIN_LOCALIZATION_TO_PLASMA_MEMBRANE	GOBP_PROTEIN_LOCALIZATION_TO_PLASMA_MEMBRANE		62	-0.254847	-1.02216	0.417339	0.996324	1	327	tags=19%, list=12%, signal=21%
GOBP_REGULATION_OF_ANATOMICAL_STRUCTURE_SIZE	GOBP_REGULATION_OF_ANATOMICAL_STRUCTURE_SIZE		121	-0.250006	-1.02132	0.397206	0.996811	1	582	tags=27%, list=21%, signal=33%
GOBP_STEROID_BIOSYNTHETIC_PROCESS	GOBP_STEROID_BIOSYNTHETIC_PROCESS		44	-0.313108	-1.02102	0.402806	0.995312	1	553	tags=30%, list=20%, signal=36%
GOBP_MONOSACCHARIDE_METABOLIC_PROCESS	GOBP_MONOSACCHARIDE_METABOLIC_PROCESS		61	-0.311348	-1.02088	0.394683	0.993111	1	149	tags=18%, list=5%, signal=19%
GOBP_PALLIUM_DEVELOPMENT	GOBP_PALLIUM_DEVELOPMENT		40	-0.293329	-1.02012	0.409266	0.993475	1	725	tags=40%, list=27%, signal=54%
GOBP_NUCLEOSIDE_PHOSPHATE_CATABOLIC_PROCESS	GOBP_NUCLEOSIDE_PHOSPHATE_CATABOLIC_PROCESS		23	-0.328163	-1.01954	0.431412	0.992824	1	832	tags=39%, list=31%, signal=56%
GOBP_NUCLEIC_ACID_PHOSPHODIESTER_BOND_HYDROLYSIS	GOBP_NUCLEIC_ACID_PHOSPHODIESTER_BOND_HYDROLYSIS		50	-0.281336	-1.01924	0.430672	0.991243	1	329	tags=16%, list=12%, signal=18%
GOBP_RHYTHMIC_PROCESS	GOBP_RHYTHMIC_PROCESS		85	-0.270878	-1.01887	0.426854	0.990026	1	438	tags=21%, list=16%, signal=24%
GOBP_RESPONSE_TO_CAMP	GOBP_RESPONSE_TO_CAMP		17	-0.354318	-1.01797	0.422179	0.990773	1	518	tags=29%, list=19%, signal=36%
GOBP_MULTI_MULTICELLULAR_ORGANISM_PROCESS	GOBP_MULTI_MULTICELLULAR_ORGANISM_PROCESS		40	-0.306161	-1.01743	0.431641	0.990039	1	578	tags=25%, list=21%, signal=31%
GOMF_ENZYME_REGULATOR_ACTIVITY	GOMF_ENZYME_REGULATOR_ACTIVITY		218	-0.215186	-1.01732	0.409178	0.987777	1	470	tags=18%, list=17%, signal=20%
GOBP_REGULATION_OF_BLOOD_PRESSURE	GOBP_REGULATION_OF_BLOOD_PRESSURE		32	-0.326356	-1.01715	0.39604	0.985835	1	423	tags=28%, list=16%, signal=33%
GOBP_CELL_MORPHOGENESIS_INVOLVED_IN_DIFFERENTIATION	GOBP_CELL_MORPHOGENESIS_INVOLVED_IN_DIFFERENTIATION		181	-0.232361	-1.01689	0.421965	0.984132	1	591	tags=27%, list=22%, signal=32%
GOMF_PROTEIN_SERINE_THREONINE_KINASE_ACTIVITY	GOMF_PROTEIN_SERINE_THREONINE_KINASE_ACTIVITY		116	-0.24321	-1.01395	0.418327	0.992548	1	602	tags=28%, list=22%, signal=35%
GOBP_CELLULAR_RESPONSE_TO_HEAT	GOBP_CELLULAR_RESPONSE_TO_HEAT		29	-0.307777	-1.01357	0.436364	0.991372	1	435	tags=31%, list=16%, signal=37%
GOBP_SYNAPTIC_TRANSMISSION_GLUTAMATERGIC	GOBP_SYNAPTIC_TRANSMISSION_GLUTAMATERGIC		20	-0.36494	-1.01169	0.456274	0.9958	1	737	tags=35%, list=27%, signal=48%
GOBP_REGULATION_OF_UBIQUITIN_DEPENDENT_PROTEIN_CATABOLIC_PROCESS	GOBP_REGULATION_OF_UBIQUITIN_DEPENDENT_PROTEIN_CATABOLIC_PROCESS		43	-0.26127	-1.01076	0.434694	0.996748	1	338	tags=19%, list=12%, signal=21%
GOBP_REGULATION_OF_SYNAPTIC_TRANSMISSION_GLUTAMATERGIC	GOBP_REGULATION_OF_SYNAPTIC_TRANSMISSION_GLUTAMATERGIC		16	-0.382154	-1.00974	0.455645	0.997896	1	737	tags=31%, list=27%, signal=43%
GOBP_POSITIVE_REGULATION_OF_PHOSPHORUS_METABOLIC_PROCESS	GOBP_POSITIVE_REGULATION_OF_PHOSPHORUS_METABOLIC_PROCESS		214	-0.230453	-1.00948	0.412262	0.996192	1	518	tags=21%, list=19%, signal=23%
GOMF_TRANSCRIPTION_FACTOR_BINDING	GOMF_TRANSCRIPTION_FACTOR_BINDING		153	-0.216644	-1.00905	0.390688	0.995182	1	407	tags=18%, list=15%, signal=20%
GOMF_SODIUM_ION_TRANSMEMBRANE_TRANSPORTER_ACTIVITY	GOMF_SODIUM_ION_TRANSMEMBRANE_TRANSPORTER_ACTIVITY		35	-0.341079	-1.00801	0.431412	0.99652	1	102	tags=9%, list=4%, signal=9%
GOMF_PHOSPHOPROTEIN_BINDING	GOMF_PHOSPHOPROTEIN_BINDING		24	-0.319254	-1.00702	0.434608	0.997583	1	198	tags=13%, list=7%, signal=13%
GOBP_NEGATIVE_REGULATION_OF_ORGANELLE_ORGANIZATION	GOBP_NEGATIVE_REGULATION_OF_ORGANELLE_ORGANIZATION		71	-0.255391	-1.00631	0.428008	0.99768	1	372	tags=17%, list=14%, signal=19%
GOBP_POSITIVE_REGULATION_OF_INTRACELLULAR_SIGNAL_TRANSDUCTION	GOBP_POSITIVE_REGULATION_OF_INTRACELLULAR_SIGNAL_TRANSDUCTION		200	-0.232719	-1.0062	0.41502	0.995474	1	440	tags=19%, list=16%, signal=20%
GOMF_TRANSLATION_REGULATOR_ACTIVITY_NUCLEIC_ACID_BINDING	GOMF_TRANSLATION_REGULATOR_ACTIVITY_NUCLEIC_ACID_BINDING		21	-0.311259	-1.00586	0.430894	0.994145	1	203	tags=19%, list=7%, signal=20%
GOBP_CELLULAR_RESPONSE_TO_PEPTIDE_HORMONE_STIMULUS	GOBP_CELLULAR_RESPONSE_TO_PEPTIDE_HORMONE_STIMULUS		73	-0.258672	-1.00539	0.425197	0.993312	1	504	tags=25%, list=19%, signal=29%
GOBP_DENDRITIC_SPINE_DEVELOPMENT	GOBP_DENDRITIC_SPINE_DEVELOPMENT		28	-0.319094	-1.00478	0.434959	0.993059	1	274	tags=14%, list=10%, signal=16%
GOMF_PROTEIN_PHOSPHORYLATED_AMINO_ACID_BINDING	GOMF_PROTEIN_PHOSPHORYLATED_AMINO_ACID_BINDING		19	-0.342919	-1.00474	0.446028	0.990648	1	198	tags=16%, list=7%, signal=17%
GOBP_LENS_DEVELOPMENT_IN_CAMERA_TYPE_EYE	GOBP_LENS_DEVELOPMENT_IN_CAMERA_TYPE_EYE		17	-0.392759	-1.00424	0.431535	0.989939	1	580	tags=47%, list=21%, signal=59%
GOBP_EPITHELIAL_CELL_DEVELOPMENT	GOBP_EPITHELIAL_CELL_DEVELOPMENT		49	-0.281637	-1.0038	0.442231	0.989053	1	457	tags=27%, list=17%, signal=31%
GOBP_LONG_CHAIN_FATTY_ACID_TRANSPORT	GOBP_LONG_CHAIN_FATTY_ACID_TRANSPORT		16	-0.398661	-1.00287	0.446	0.990121	1	494	tags=31%, list=18%, signal=38%
GOBP_APOPTOTIC_SIGNALING_PATHWAY	GOBP_APOPTOTIC_SIGNALING_PATHWAY		128	-0.218094	-1.00242	0.452055	0.989339	1	413	tags=17%, list=15%, signal=19%
GOBP_CIRCADIAN_REGULATION_OF_GENE_EXPRESSION	GOBP_CIRCADIAN_REGULATION_OF_GENE_EXPRESSION		15	-0.419548	-1.00232	0.451677	0.987216	1	429	tags=47%, list=16%, signal=55%
GOBP_SIGNAL_TRANSDUCTION_IN_RESPONSE_TO_DNA_DAMAGE	GOBP_SIGNAL_TRANSDUCTION_IN_RESPONSE_TO_DNA_DAMAGE		30	-0.308256	-1.00204	0.444444	0.985652	1	342	tags=27%, list=13%, signal=30%
GOBP_CELL_PART_MORPHOGENESIS	GOBP_CELL_PART_MORPHOGENESIS		175	-0.220749	-1.00187	0.464217	0.983792	1	591	tags=23%, list=22%, signal=28%
GOBP_ORGANIC_ACID_METABOLIC_PROCESS	GOBP_ORGANIC_ACID_METABOLIC_PROCESS		183	-0.234194	-1.00067	0.463312	0.985678	1	518	tags=26%, list=19%, signal=30%
GOBP_FC_RECEPTOR_SIGNALING_PATHWAY	GOBP_FC_RECEPTOR_SIGNALING_PATHWAY		46	-0.256512	-1.00041	0.442043	0.98418	1	820	tags=33%, list=30%, signal=46%
GOBP_CELLULAR_RESPONSE_TO_INSULIN_STIMULUS	GOBP_CELLULAR_RESPONSE_TO_INSULIN_STIMULUS		55	-0.272088	-0.999794	0.453649	0.983996	1	450	tags=25%, list=17%, signal=30%
GOBP_GLYCEROLIPID_BIOSYNTHETIC_PROCESS	GOBP_GLYCEROLIPID_BIOSYNTHETIC_PROCESS		56	-0.273842	-0.999261	0.47929	0.9835	1	574	tags=25%, list=21%, signal=31%
GOBP_CELLULAR_RESPONSE_TO_ALCOHOL	GOBP_CELLULAR_RESPONSE_TO_ALCOHOL		21	-0.321939	-0.998832	0.441176	0.982634	1	39	tags=10%, list=1%, signal=10%
GOBP_GLAND_DEVELOPMENT	GOBP_GLAND_DEVELOPMENT		111	-0.243954	-0.998357	0.431138	0.981913	1	145	tags=9%, list=5%, signal=9%
GOBP_REGULATION_OF_NEUROGENESIS	GOBP_REGULATION_OF_NEUROGENESIS		88	-0.239704	-0.998139	0.416503	0.98025	1	808	tags=39%, list=30%, signal=53%
GOBP_POLYOL_METABOLIC_PROCESS	GOBP_POLYOL_METABOLIC_PROCESS		24	-0.340052	-0.997633	0.461538	0.979576	1	160	tags=17%, list=6%, signal=18%
GOBP_RESPONSE_TO_PEPTIDE_HORMONE	GOBP_RESPONSE_TO_PEPTIDE_HORMONE		97	-0.255574	-0.99699	0.459566	0.979443	1	376	tags=21%, list=14%, signal=23%
GOBP_PROTEASOMAL_PROTEIN_CATABOLIC_PROCESS	GOBP_PROTEASOMAL_PROTEIN_CATABOLIC_PROCESS		101	-0.227995	-0.996719	0.449393	0.978022	1	338	tags=14%, list=12%, signal=15%
GOBP_POSITIVE_REGULATION_OF_PROTEIN_KINASE_ACTIVITY	GOBP_POSITIVE_REGULATION_OF_PROTEIN_KINASE_ACTIVITY		121	-0.241543	-0.996069	0.462451	0.977967	1	372	tags=15%, list=14%, signal=16%
GOBP_NEUROTRANSMITTER_TRANSPORT	GOBP_NEUROTRANSMITTER_TRANSPORT		57	-0.269805	-0.995571	0.453382	0.977352	1	15	tags=4%, list=1%, signal=3%
GOBP_POSITIVE_REGULATION_OF_NF_KAPPAB_TRANSCRIPTION_FACTOR_ACTIVITY	GOBP_POSITIVE_REGULATION_OF_NF_KAPPAB_TRANSCRIPTION_FACTOR_ACTIVITY		32	-0.299369	-0.994342	0.465753	0.979551	1	496	tags=25%, list=18%, signal=30%
GOCC_EXTRINSIC_COMPONENT_OF_CYTOPLASMIC_SIDE_OF_PLASMA_MEMBRANE	GOCC_EXTRINSIC_COMPONENT_OF_CYTOPLASMIC_SIDE_OF_PLASMA_MEMBRANE		21	-0.340279	-0.993436	0.466667	0.980687	1	277	tags=19%, list=10%, signal=21%
GOBP_LIPID_BIOSYNTHETIC_PROCESS	GOBP_LIPID_BIOSYNTHETIC_PROCESS		138	-0.243913	-0.993154	0.449612	0.979354	1	553	tags=25%, list=20%, signal=29%
GOBP_INSULIN_RECEPTOR_SIGNALING_PATHWAY	GOBP_INSULIN_RECEPTOR_SIGNALING_PATHWAY		43	-0.305098	-0.992107	0.436105	0.980821	1	450	tags=30%, list=17%, signal=36%
GOBP_FATTY_ACID_TRANSPORT	GOBP_FATTY_ACID_TRANSPORT		35	-0.309099	-0.991905	0.473477	0.979158	1	494	tags=23%, list=18%, signal=28%
GOBP_REGULATION_OF_INTRACELLULAR_SIGNAL_TRANSDUCTION	GOBP_REGULATION_OF_INTRACELLULAR_SIGNAL_TRANSDUCTION		351	-0.212438	-0.991518	0.476673	0.978164	1	440	tags=18%, list=16%, signal=18%
GOBP_CELL_MORPHOGENESIS_INVOLVED_IN_NEURON_DIFFERENTIATION	GOBP_CELL_MORPHOGENESIS_INVOLVED_IN_NEURON_DIFFERENTIATION		146	-0.225948	-0.991246	0.463366	0.976758	1	591	tags=25%, list=22%, signal=31%
GOBP_REGULATION_OF_FATTY_ACID_METABOLIC_PROCESS	GOBP_REGULATION_OF_FATTY_ACID_METABOLIC_PROCESS		19	-0.391063	-0.991192	0.479612	0.97459	1	392	tags=32%, list=14%, signal=37%
GOBP_CALCIUM_ION_TRANSMEMBRANE_TRANSPORT	GOBP_CALCIUM_ION_TRANSMEMBRANE_TRANSPORT		61	-0.257823	-0.991157	0.465021	0.972374	1	659	tags=34%, list=24%, signal=44%
GOBP_MAMMARY_GLAND_MORPHOGENESIS	GOBP_MAMMARY_GLAND_MORPHOGENESIS		15	-0.354433	-0.989608	0.46748	0.975764	1	321	tags=20%, list=12%, signal=23%
GOCC_INTRACELLULAR_PROTEIN_CONTAINING_COMPLEX	GOCC_INTRACELLULAR_PROTEIN_CONTAINING_COMPLEX		122	-0.231964	-0.989076	0.473469	0.975393	1	587	tags=25%, list=22%, signal=30%
GOBP_DENDRITE_MORPHOGENESIS	GOBP_DENDRITE_MORPHOGENESIS		42	-0.293544	-0.988901	0.468172	0.973701	1	354	tags=19%, list=13%, signal=22%
GOBP_ORGANIC_ANION_TRANSPORT	GOBP_ORGANIC_ANION_TRANSPORT		73	-0.272624	-0.988599	0.496094	0.972487	1	651	tags=26%, list=24%, signal=33%
GOBP_POSITIVE_REGULATION_OF_PROTEIN_CONTAINING_COMPLEX_ASSEMBLY	GOBP_POSITIVE_REGULATION_OF_PROTEIN_CONTAINING_COMPLEX_ASSEMBLY		54	-0.289839	-0.988312	0.480573	0.971245	1	519	tags=26%, list=19%, signal=31%
GOBP_POSITIVE_REGULATION_OF_ATP_METABOLIC_PROCESS	GOBP_POSITIVE_REGULATION_OF_ATP_METABOLIC_PROCESS		15	-0.407838	-0.988039	0.468938	0.969977	1	133	tags=20%, list=5%, signal=21%
GOMF_PEPTIDASE_REGULATOR_ACTIVITY	GOMF_PEPTIDASE_REGULATOR_ACTIVITY		32	-0.304686	-0.986478	0.479924	0.973088	1	728	tags=44%, list=27%, signal=59%
GOBP_CARBOXYLIC_ACID_TRANSPORT	GOBP_CARBOXYLIC_ACID_TRANSPORT		57	-0.286972	-0.986454	0.479087	0.970878	1	93	tags=7%, list=3%, signal=7%
GOBP_POSITIVE_REGULATION_OF_LEUKOCYTE_PROLIFERATION	GOBP_POSITIVE_REGULATION_OF_LEUKOCYTE_PROLIFERATION		24	-0.32032	-0.984694	0.471173	0.97483	1	300	tags=21%, list=11%, signal=23%
GOMF_PROTEIN_SERINE_KINASE_ACTIVITY	GOMF_PROTEIN_SERINE_KINASE_ACTIVITY		61	-0.252817	-0.983581	0.491159	0.976517	1	755	tags=30%, list=28%, signal=40%
GOBP_IRON_ION_TRANSPORT	GOBP_IRON_ION_TRANSPORT		16	-0.341687	-0.982672	0.490872	0.977255	1	504	tags=31%, list=19%, signal=38%
GOBP_LOCALIZATION_WITHIN_MEMBRANE	GOBP_LOCALIZATION_WITHIN_MEMBRANE		16	-0.344004	-0.981824	0.477733	0.977961	1	966	tags=63%, list=35%, signal=96%
GOBP_CELLULAR_RESPONSE_TO_TOXIC_SUBSTANCE	GOBP_CELLULAR_RESPONSE_TO_TOXIC_SUBSTANCE		17	-0.382785	-0.981335	0.490234	0.977425	1	128	tags=18%, list=5%, signal=18%
GOBP_PROTEIN_TARGETING_TO_MITOCHONDRION	GOBP_PROTEIN_TARGETING_TO_MITOCHONDRION		22	-0.290199	-0.981318	0.450102	0.975207	1	915	tags=59%, list=34%, signal=88%
GOBP_PROTEOLYSIS	GOBP_PROTEOLYSIS		338	-0.195145	-0.981047	0.502032	0.973903	1	693	tags=27%, list=25%, signal=32%
GOBP_REGULATION_OF_ESTABLISHMENT_OF_PROTEIN_LOCALIZATION_TO_MITOCHONDRION	GOBP_REGULATION_OF_ESTABLISHMENT_OF_PROTEIN_LOCALIZATION_TO_MITOCHONDRION		21	-0.305743	-0.980422	0.471154	0.973824	1	886	tags=62%, list=33%, signal=91%
GOBP_PURINE_NUCLEOSIDE_METABOLIC_PROCESS	GOBP_PURINE_NUCLEOSIDE_METABOLIC_PROCESS		15	-0.342956	-0.979671	0.447368	0.974194	1	310	tags=27%, list=11%, signal=30%
GOMF_GDP_BINDING	GOMF_GDP_BINDING		23	-0.339755	-0.9794	0.485265	0.973021	1	486	tags=30%, list=18%, signal=37%
GOMF_LYASE_ACTIVITY	GOMF_LYASE_ACTIVITY		37	-0.268983	-0.979039	0.469307	0.972049	1	662	tags=35%, list=24%, signal=46%
GOBP_CELLULAR_KETONE_METABOLIC_PROCESS	GOBP_CELLULAR_KETONE_METABOLIC_PROCESS		48	-0.303185	-0.977902	0.475634	0.973689	1	812	tags=44%, list=30%, signal=61%
GOBP_INTRINSIC_APOPTOTIC_SIGNALING_PATHWAY	GOBP_INTRINSIC_APOPTOTIC_SIGNALING_PATHWAY		60	-0.228696	-0.977062	0.467583	0.974371	1	321	tags=12%, list=12%, signal=13%
GOBP_DICARBOXYLIC_ACID_METABOLIC_PROCESS	GOBP_DICARBOXYLIC_ACID_METABOLIC_PROCESS		17	-0.343004	-0.976991	0.5	0.972402	1	150	tags=24%, list=6%, signal=25%
GOCC_NEURON_TO_NEURON_SYNAPSE	GOCC_NEURON_TO_NEURON_SYNAPSE		83	-0.231832	-0.976354	0.496169	0.972432	1	891	tags=43%, list=33%, signal=62%
GOBP_POSITIVE_REGULATION_OF_EPITHELIAL_CELL_MIGRATION	GOBP_POSITIVE_REGULATION_OF_EPITHELIAL_CELL_MIGRATION		42	-0.305437	-0.974862	0.517857	0.975303	1	290	tags=19%, list=11%, signal=21%
GOBP_GROWTH	GOBP_GROWTH		201	-0.218272	-0.974689	0.488095	0.973716	1	457	tags=18%, list=17%, signal=20%
GOBP_NEURAL_CREST_CELL_MIGRATION	GOBP_NEURAL_CREST_CELL_MIGRATION		16	-0.353239	-0.971918	0.501014	0.981227	1	300	tags=31%, list=11%, signal=35%
GOBP_RESPIRATORY_SYSTEM_DEVELOPMENT	GOBP_RESPIRATORY_SYSTEM_DEVELOPMENT		48	-0.262889	-0.971477	0.520629	0.980587	1	238	tags=17%, list=9%, signal=18%
GOBP_NEGATIVE_REGULATION_OF_EXTRINSIC_APOPTOTIC_SIGNALING_PATHWAY	GOBP_NEGATIVE_REGULATION_OF_EXTRINSIC_APOPTOTIC_SIGNALING_PATHWAY		24	-0.332639	-0.971218	0.498986	0.979293	1	384	tags=25%, list=14%, signal=29%
GOCC_PEPTIDASE_COMPLEX	GOCC_PEPTIDASE_COMPLEX		16	-0.323576	-0.970181	0.523711	0.980787	1	245	tags=19%, list=9%, signal=20%
GOBP_PROTEOGLYCAN_BIOSYNTHETIC_PROCESS	GOBP_PROTEOGLYCAN_BIOSYNTHETIC_PROCESS		15	-0.34257	-0.96976	0.47379	0.980023	1	423	tags=33%, list=16%, signal=39%
GOBP_POSITIVE_REGULATION_OF_EPITHELIAL_CELL_PROLIFERATION	GOBP_POSITIVE_REGULATION_OF_EPITHELIAL_CELL_PROLIFERATION		42	-0.278415	-0.968455	0.528226	0.98253	1	457	tags=24%, list=17%, signal=28%
GOBP_MONOCARBOXYLIC_ACID_BIOSYNTHETIC_PROCESS	GOBP_MONOCARBOXYLIC_ACID_BIOSYNTHETIC_PROCESS		32	-0.322034	-0.968366	0.500982	0.980588	1	301	tags=22%, list=11%, signal=24%
GOMF_LIPID_BINDING	GOMF_LIPID_BINDING		145	-0.227385	-0.968151	0.527237	0.979083	1	414	tags=21%, list=15%, signal=24%
GOBP_MONOSACCHARIDE_BIOSYNTHETIC_PROCESS	GOBP_MONOSACCHARIDE_BIOSYNTHETIC_PROCESS		16	-0.355784	-0.96779	0.510516	0.978112	1	129	tags=19%, list=5%, signal=20%
GOBP_RESPONSE_TO_ORGANOPHOSPHORUS	GOBP_RESPONSE_TO_ORGANOPHOSPHORUS		26	-0.325789	-0.967581	0.504098	0.976642	1	604	tags=31%, list=22%, signal=39%
GOBP_REGULATION_OF_SIGNAL_TRANSDUCTION_BY_P53_CLASS_MEDIATOR	GOBP_REGULATION_OF_SIGNAL_TRANSDUCTION_BY_P53_CLASS_MEDIATOR		40	-0.28449	-0.966789	0.494759	0.977189	1	407	tags=20%, list=15%, signal=23%
GOBP_REGULATION_OF_PHOSPHORUS_METABOLIC_PROCESS	GOBP_REGULATION_OF_PHOSPHORUS_METABOLIC_PROCESS		328	-0.212187	-0.966633	0.567623	0.975581	1	519	tags=22%, list=19%, signal=24%
GOBP_CELLULAR_RESPONSE_TO_UV	GOBP_CELLULAR_RESPONSE_TO_UV		19	-0.31621	-0.966594	0.509278	0.973536	1	122	tags=11%, list=4%, signal=11%
GOCC_NEURON_SPINE	GOCC_NEURON_SPINE		41	-0.255207	-0.965964	0.484685	0.973494	1	1079	tags=59%, list=40%, signal=95%
GOBP_CARDIAC_CONDUCTION	GOBP_CARDIAC_CONDUCTION		37	-0.272442	-0.965489	0.492095	0.972998	1	777	tags=38%, list=29%, signal=52%
GOMF_DNA_BINDING_TRANSCRIPTION_FACTOR_BINDING	GOMF_DNA_BINDING_TRANSCRIPTION_FACTOR_BINDING		91	-0.226661	-0.963866	0.493976	0.976409	1	314	tags=14%, list=12%, signal=16%
GOCC_CYTOPLASMIC_SIDE_OF_MEMBRANE	GOCC_CYTOPLASMIC_SIDE_OF_MEMBRANE		47	-0.269426	-0.96348	0.493097	0.975576	1	181	tags=13%, list=7%, signal=13%
GOBP_FEMALE_GAMETE_GENERATION	GOBP_FEMALE_GAMETE_GENERATION		25	-0.340767	-0.962618	0.544898	0.976381	1	456	tags=24%, list=17%, signal=29%
GOBP_NEGATIVE_REGULATION_OF_CELL_DEATH	GOBP_NEGATIVE_REGULATION_OF_CELL_DEATH		198	-0.219008	-0.962431	0.54509	0.974927	1	308	tags=14%, list=11%, signal=14%
GOBP_CENTRAL_NERVOUS_SYSTEM_DEVELOPMENT	GOBP_CENTRAL_NERVOUS_SYSTEM_DEVELOPMENT		224	-0.214517	-0.962296	0.533962	0.973236	1	712	tags=32%, list=26%, signal=40%
GOBP_MOLTING_CYCLE	GOBP_MOLTING_CYCLE		21	-0.315893	-0.962017	0.484436	0.972093	1	457	tags=24%, list=17%, signal=28%
GOBP_JNK_CASCADE	GOBP_JNK_CASCADE		46	-0.275335	-0.961981	0.504237	0.970126	1	290	tags=15%, list=11%, signal=17%
GOBP_ACIDIC_AMINO_ACID_TRANSPORT	GOBP_ACIDIC_AMINO_ACID_TRANSPORT		17	-0.35068	-0.961637	0.506616	0.969287	1	628	tags=29%, list=23%, signal=38%
GOBP_CELLULAR_AMINO_ACID_METABOLIC_PROCESS	GOBP_CELLULAR_AMINO_ACID_METABOLIC_PROCESS		61	-0.267734	-0.96104	0.533195	0.969233	1	832	tags=48%, list=31%, signal=67%
GOBP_ACTIVATION_OF_MAPKK_ACTIVITY	GOBP_ACTIVATION_OF_MAPKK_ACTIVITY		16	-0.351208	-0.960727	0.521097	0.968201	1	214	tags=13%, list=8%, signal=13%
GOCC_SOMATODENDRITIC_COMPARTMENT	GOCC_SOMATODENDRITIC_COMPARTMENT		183	-0.225739	-0.960594	0.544177	0.966557	1	738	tags=30%, list=27%, signal=38%
GOBP_REGULATION_OF_APOPTOTIC_SIGNALING_PATHWAY	GOBP_REGULATION_OF_APOPTOTIC_SIGNALING_PATHWAY		79	-0.233305	-0.959424	0.523614	0.968291	1	321	tags=15%, list=12%, signal=17%
GOCC_MEMBRANE_COAT	GOCC_MEMBRANE_COAT		16	-0.325498	-0.958935	0.499022	0.967889	1	509	tags=38%, list=19%, signal=46%
GOBP_POSITIVE_REGULATION_OF_BINDING	GOBP_POSITIVE_REGULATION_OF_BINDING		39	-0.263778	-0.958444	0.579962	0.967404	1	284	tags=15%, list=10%, signal=17%
GOBP_NUCLEOSIDE_PHOSPHATE_BIOSYNTHETIC_PROCESS	GOBP_NUCLEOSIDE_PHOSPHATE_BIOSYNTHETIC_PROCESS		35	-0.31081	-0.957765	0.510978	0.967637	1	365	tags=23%, list=13%, signal=26%
GOBP_ENDOTHELIAL_CELL_PROLIFERATION	GOBP_ENDOTHELIAL_CELL_PROLIFERATION		30	-0.31471	-0.957444	0.512295	0.966621	1	241	tags=20%, list=9%, signal=22%
GOBP_REGULATION_OF_CELL_DEVELOPMENT	GOBP_REGULATION_OF_CELL_DEVELOPMENT		123	-0.227624	-0.95742	0.54191	0.964665	1	407	tags=20%, list=15%, signal=23%
GOBP_BONE_MINERALIZATION	GOBP_BONE_MINERALIZATION		25	-0.323472	-0.957296	0.515625	0.963032	1	492	tags=32%, list=18%, signal=39%
GOBP_NEGATIVE_REGULATION_OF_HYDROLASE_ACTIVITY	GOBP_NEGATIVE_REGULATION_OF_HYDROLASE_ACTIVITY		66	-0.255694	-0.957172	0.52549	0.961406	1	453	tags=23%, list=17%, signal=27%
GOBP_NUCLEOBASE_CONTAINING_SMALL_MOLECULE_METABOLIC_PROCESS	GOBP_NUCLEOBASE_CONTAINING_SMALL_MOLECULE_METABOLIC_PROCESS		123	-0.240906	-0.956126	0.547569	0.962662	1	365	tags=19%, list=13%, signal=21%
GOBP_NEURON_APOPTOTIC_PROCESS	GOBP_NEURON_APOPTOTIC_PROCESS		48	-0.28957	-0.955197	0.526	0.963746	1	227	tags=17%, list=8%, signal=18%
GOMF_PHOSPHATIDYLSERINE_BINDING	GOMF_PHOSPHATIDYLSERINE_BINDING		15	-0.366531	-0.955121	0.50505	0.961967	1	445	tags=27%, list=16%, signal=32%
GOBP_REGULATION_OF_BIOMINERALIZATION	GOBP_REGULATION_OF_BIOMINERALIZATION		21	-0.330658	-0.95499	0.501002	0.960397	1	492	tags=38%, list=18%, signal=46%
GOCC_MAIN_AXON	GOCC_MAIN_AXON		19	-0.306664	-0.954514	0.528066	0.95996	1	516	tags=26%, list=19%, signal=32%
GOBP_IMPORT_ACROSS_PLASMA_MEMBRANE	GOBP_IMPORT_ACROSS_PLASMA_MEMBRANE		46	-0.254256	-0.954059	0.557957	0.959531	1	733	tags=33%, list=27%, signal=44%
GOBP_REGULATION_OF_PROTEIN_CONTAINING_COMPLEX_ASSEMBLY	GOBP_REGULATION_OF_PROTEIN_CONTAINING_COMPLEX_ASSEMBLY		94	-0.238332	-0.953854	0.536634	0.958224	1	575	tags=27%, list=21%, signal=33%
GOCC_CELL_LEADING_EDGE	GOCC_CELL_LEADING_EDGE		102	-0.245619	-0.953673	0.542146	0.956861	1	453	tags=20%, list=17%, signal=23%
GOBP_PROTEIN_LOCALIZATION_TO_CELL_JUNCTION	GOBP_PROTEIN_LOCALIZATION_TO_CELL_JUNCTION		28	-0.286416	-0.953211	0.522199	0.956428	1	579	tags=43%, list=21%, signal=54%
GOBP_REGULATION_OF_DNA_BINDING_TRANSCRIPTION_FACTOR_ACTIVITY	GOBP_REGULATION_OF_DNA_BINDING_TRANSCRIPTION_FACTOR_ACTIVITY		87	-0.227983	-0.952519	0.518908	0.956652	1	299	tags=14%, list=11%, signal=15%
GOBP_ALCOHOL_METABOLIC_PROCESS	GOBP_ALCOHOL_METABOLIC_PROCESS		74	-0.251736	-0.951978	0.589537	0.956439	1	545	tags=27%, list=20%, signal=33%
GOCC_INTERCALATED_DISC	GOCC_INTERCALATED_DISC		16	-0.367629	-0.951318	0.501023	0.956653	1	655	tags=50%, list=24%, signal=65%
GOBP_TRANSLATIONAL_INITIATION	GOBP_TRANSLATIONAL_INITIATION		48	-0.200975	-0.9508	0.506122	0.956343	1	276	tags=10%, list=10%, signal=11%
GOBP_NEGATIVE_REGULATION_OF_CELLULAR_COMPONENT_ORGANIZATION	GOBP_NEGATIVE_REGULATION_OF_CELLULAR_COMPONENT_ORGANIZATION		152	-0.209908	-0.950514	0.555773	0.955357	1	400	tags=16%, list=15%, signal=18%
GOBP_DENDRITE_DEVELOPMENT	GOBP_DENDRITE_DEVELOPMENT		63	-0.255352	-0.95009	0.534188	0.954804	1	409	tags=17%, list=15%, signal=20%
GOBP_NEGATIVE_REGULATION_OF_BINDING	GOBP_NEGATIVE_REGULATION_OF_BINDING		38	-0.312233	-0.948944	0.56338	0.956514	1	365	tags=18%, list=13%, signal=21%
GOBP_CELL_CELL_SIGNALING_BY_WNT	GOBP_CELL_CELL_SIGNALING_BY_WNT		106	-0.23691	-0.948859	0.548902	0.954848	1	1018	tags=47%, list=37%, signal=72%
GOBP_POSITIVE_REGULATION_OF_PROTEIN_LOCALIZATION_TO_CELL_PERIPHERY	GOBP_POSITIVE_REGULATION_OF_PROTEIN_LOCALIZATION_TO_CELL_PERIPHERY		20	-0.331739	-0.948389	0.536585	0.954466	1	1074	tags=55%, list=39%, signal=90%
GOBP_CELLULAR_RESPONSE_TO_OXYGEN_CONTAINING_COMPOUND	GOBP_CELLULAR_RESPONSE_TO_OXYGEN_CONTAINING_COMPOUND		240	-0.209109	-0.948296	0.579766	0.952833	1	399	tags=16%, list=15%, signal=17%
GOCC_SWI_SNF_SUPERFAMILY_TYPE_COMPLEX	GOCC_SWI_SNF_SUPERFAMILY_TYPE_COMPLEX		18	-0.323521	-0.947786	0.547368	0.952525	1	171	tags=17%, list=6%, signal=18%
GOMF_OXIDOREDUCTASE_ACTIVITY_ACTING_ON_CH_OH_GROUP_OF_DONORS	GOMF_OXIDOREDUCTASE_ACTIVITY_ACTING_ON_CH_OH_GROUP_OF_DONORS		15	-0.397862	-0.947409	0.526	0.951847	1	150	tags=27%, list=6%, signal=28%
GOBP_PROTEIN_TARGETING	GOBP_PROTEIN_TARGETING		111	-0.194355	-0.947347	0.539235	0.950136	1	507	tags=18%, list=19%, signal=21%
GOBP_ASTROCYTE_DIFFERENTIATION	GOBP_ASTROCYTE_DIFFERENTIATION		18	-0.319954	-0.946314	0.523232	0.951417	1	602	tags=28%, list=22%, signal=35%
GOBP_POSITIVE_REGULATION_OF_INTRINSIC_APOPTOTIC_SIGNALING_PATHWAY	GOBP_POSITIVE_REGULATION_OF_INTRINSIC_APOPTOTIC_SIGNALING_PATHWAY		18	-0.320402	-0.94516	0.514911	0.953187	1	231	tags=11%, list=8%, signal=12%
GOBP_ALPHA_AMINO_ACID_METABOLIC_PROCESS	GOBP_ALPHA_AMINO_ACID_METABOLIC_PROCESS		46	-0.290093	-0.945116	0.553015	0.951419	1	742	tags=46%, list=27%, signal=62%
GOBP_REGULATION_OF_PROTEIN_PHOSPHORYLATION	GOBP_REGULATION_OF_PROTEIN_PHOSPHORYLATION		252	-0.201748	-0.944254	0.588353	0.952171	1	519	tags=21%, list=19%, signal=24%
GOBP_IMPORT_INTO_CELL	GOBP_IMPORT_INTO_CELL		64	-0.241243	-0.944203	0.603143	0.950442	1	743	tags=30%, list=27%, signal=40%
GOBP_NEGATIVE_REGULATION_OF_TRANSFERASE_ACTIVITY	GOBP_NEGATIVE_REGULATION_OF_TRANSFERASE_ACTIVITY		58	-0.23876	-0.943975	0.555556	0.949271	1	621	tags=31%, list=23%, signal=39%
GOBP_AXON_EXTENSION	GOBP_AXON_EXTENSION		33	-0.279813	-0.943897	0.542683	0.947631	1	369	tags=24%, list=14%, signal=28%
GOBP_DETECTION_OF_STIMULUS	GOBP_DETECTION_OF_STIMULUS		47	-0.281083	-0.943151	0.573441	0.948038	1	83	tags=9%, list=3%, signal=9%
GOBP_PANCREAS_DEVELOPMENT	GOBP_PANCREAS_DEVELOPMENT		20	-0.332768	-0.942976	0.534247	0.946754	1	282	tags=25%, list=10%, signal=28%
GOMF_IMMUNE_RECEPTOR_ACTIVITY	GOMF_IMMUNE_RECEPTOR_ACTIVITY		26	-0.306042	-0.942692	0.567623	0.945804	1	897	tags=42%, list=33%, signal=62%
GOBP_REGULATION_OF_PROTEASOMAL_PROTEIN_CATABOLIC_PROCESS	GOBP_REGULATION_OF_PROTEASOMAL_PROTEIN_CATABOLIC_PROCESS		45	-0.247456	-0.941275	0.546939	0.948413	1	338	tags=18%, list=12%, signal=20%
GOBP_HEMATOPOIETIC_PROGENITOR_CELL_DIFFERENTIATION	GOBP_HEMATOPOIETIC_PROGENITOR_CELL_DIFFERENTIATION		40	-0.275941	-0.940187	0.549801	0.949993	1	457	tags=28%, list=17%, signal=33%
GOBP_CELL_FATE_SPECIFICATION	GOBP_CELL_FATE_SPECIFICATION		23	-0.279472	-0.940158	0.530992	0.948245	1	952	tags=43%, list=35%, signal=66%
GOCC_PROTEIN_KINASE_COMPLEX	GOCC_PROTEIN_KINASE_COMPLEX		29	-0.307931	-0.939103	0.519427	0.94966	1	88	tags=10%, list=3%, signal=11%
GOBP_FC_EPSILON_RECEPTOR_SIGNALING_PATHWAY	GOBP_FC_EPSILON_RECEPTOR_SIGNALING_PATHWAY		28	-0.270578	-0.938596	0.516129	0.949406	1	812	tags=36%, list=30%, signal=50%
GOBP_REGULATION_OF_HEMATOPOIETIC_STEM_CELL_DIFFERENTIATION	GOBP_REGULATION_OF_HEMATOPOIETIC_STEM_CELL_DIFFERENTIATION		15	-0.322164	-0.938457	0.52907	0.947964	1	812	tags=40%, list=30%, signal=57%
GOBP_ORGANIC_ACID_BIOSYNTHETIC_PROCESS	GOBP_ORGANIC_ACID_BIOSYNTHETIC_PROCESS		54	-0.277145	-0.93783	0.549407	0.948112	1	662	tags=37%, list=24%, signal=48%
GOBP_RIBONUCLEOSIDE_METABOLIC_PROCESS	GOBP_RIBONUCLEOSIDE_METABOLIC_PROCESS		18	-0.307382	-0.937537	0.550976	0.947119	1	310	tags=22%, list=11%, signal=25%
GOBP_REGULATION_OF_TRANSMEMBRANE_TRANSPORT	GOBP_REGULATION_OF_TRANSMEMBRANE_TRANSPORT		115	-0.214304	-0.937093	0.588803	0.946697	1	660	tags=27%, list=24%, signal=34%
GOBP_NEGATIVE_REGULATION_OF_PROTEIN_CONTAINING_COMPLEX_ASSEMBLY	GOBP_NEGATIVE_REGULATION_OF_PROTEIN_CONTAINING_COMPLEX_ASSEMBLY		33	-0.249961	-0.935577	0.544231	0.949504	1	433	tags=21%, list=16%, signal=25%
GOBP_NEGATIVE_REGULATION_OF_INTRINSIC_APOPTOTIC_SIGNALING_PATHWAY	GOBP_NEGATIVE_REGULATION_OF_INTRINSIC_APOPTOTIC_SIGNALING_PATHWAY		19	-0.283388	-0.935539	0.518072	0.947791	1	274	tags=11%, list=10%, signal=12%
GOBP_POSITIVE_REGULATION_OF_MAPK_CASCADE	GOBP_POSITIVE_REGULATION_OF_MAPK_CASCADE		107	-0.239362	-0.935532	0.568182	0.945988	1	407	tags=19%, list=15%, signal=21%
GOBP_REGULATION_OF_AUTOPHAGY	GOBP_REGULATION_OF_AUTOPHAGY		74	-0.219273	-0.935424	0.575937	0.944484	1	380	tags=16%, list=14%, signal=18%
GOBP_SMALL_MOLECULE_CATABOLIC_PROCESS	GOBP_SMALL_MOLECULE_CATABOLIC_PROCESS		84	-0.231874	-0.935332	0.597633	0.942963	1	623	tags=29%, list=23%, signal=36%
GOBP_CARBOHYDRATE_DERIVATIVE_BIOSYNTHETIC_PROCESS	GOBP_CARBOHYDRATE_DERIVATIVE_BIOSYNTHETIC_PROCESS		117	-0.237312	-0.930346	0.619145	0.956677	1	423	tags=23%, list=16%, signal=26%
GOMF_METAL_ION_TRANSMEMBRANE_TRANSPORTER_ACTIVITY	GOMF_METAL_ION_TRANSMEMBRANE_TRANSPORTER_ACTIVITY		111	-0.2336	-0.930236	0.653768	0.955214	1	663	tags=28%, list=24%, signal=35%
GOBP_SPINAL_CORD_DEVELOPMENT	GOBP_SPINAL_CORD_DEVELOPMENT		22	-0.281204	-0.92746	0.582178	0.962095	1	457	tags=18%, list=17%, signal=22%
GOCC_EARLY_ENDOSOME_MEMBRANE	GOCC_EARLY_ENDOSOME_MEMBRANE		41	-0.261629	-0.927306	0.577551	0.960766	1	358	tags=20%, list=13%, signal=22%
GOBP_SYNAPTIC_SIGNALING	GOBP_SYNAPTIC_SIGNALING		165	-0.215356	-0.926963	0.622351	0.959962	1	793	tags=33%, list=29%, signal=43%
GOBP_MACROAUTOPHAGY	GOBP_MACROAUTOPHAGY		51	-0.245458	-0.926936	0.560158	0.95822	1	376	tags=18%, list=14%, signal=20%
GOBP_HOMOPHILIC_CELL_ADHESION_VIA_PLASMA_MEMBRANE_ADHESION_MOLECULES	GOBP_HOMOPHILIC_CELL_ADHESION_VIA_PLASMA_MEMBRANE_ADHESION_MOLECULES		21	-0.317829	-0.925947	0.557344	0.959504	1	1162	tags=62%, list=43%, signal=107%
GOBP_NEGATIVE_REGULATION_OF_CELL_DEVELOPMENT	GOBP_NEGATIVE_REGULATION_OF_CELL_DEVELOPMENT		44	-0.275146	-0.924355	0.565041	0.962752	1	524	tags=30%, list=19%, signal=36%
GOBP_NEGATIVE_REGULATION_OF_CELL_GROWTH	GOBP_NEGATIVE_REGULATION_OF_CELL_GROWTH		46	-0.255241	-0.922825	0.59802	0.96574	1	400	tags=22%, list=15%, signal=25%
GOBP_NEURON_FATE_COMMITMENT	GOBP_NEURON_FATE_COMMITMENT		16	-0.331828	-0.922615	0.552147	0.964594	1	952	tags=44%, list=35%, signal=67%
GOCC_MOTILE_CILIUM	GOCC_MOTILE_CILIUM		23	-0.311312	-0.922272	0.581028	0.963789	1	129	tags=17%, list=5%, signal=18%
GOBP_NEGATIVE_REGULATION_OF_NEURON_DIFFERENTIATION	GOBP_NEGATIVE_REGULATION_OF_NEURON_DIFFERENTIATION		16	-0.310872	-0.921874	0.537572	0.963137	1	457	tags=31%, list=17%, signal=37%
GOBP_POSITIVE_REGULATION_OF_NEUROGENESIS	GOBP_POSITIVE_REGULATION_OF_NEUROGENESIS		56	-0.254579	-0.921369	0.562	0.962827	1	297	tags=18%, list=11%, signal=20%
GOBP_PROTEIN_MODIFICATION_BY_SMALL_PROTEIN_CONJUGATION	GOBP_PROTEIN_MODIFICATION_BY_SMALL_PROTEIN_CONJUGATION		170	-0.208427	-0.921224	0.593617	0.961484	1	338	tags=14%, list=12%, signal=14%
GOBP_AMINE_TRANSPORT	GOBP_AMINE_TRANSPORT		15	-0.342116	-0.92067	0.591753	0.961445	1	447	tags=27%, list=16%, signal=32%
GOMF_DOUBLE_STRANDED_RNA_BINDING	GOMF_DOUBLE_STRANDED_RNA_BINDING		25	-0.273639	-0.920571	0.568134	0.959988	1	510	tags=20%, list=19%, signal=24%
GOBP_POSITIVE_REGULATION_OF_PROTEIN_METABOLIC_PROCESS	GOBP_POSITIVE_REGULATION_OF_PROTEIN_METABOLIC_PROCESS		319	-0.192443	-0.920504	0.687747	0.958385	1	643	tags=25%, list=24%, signal=29%
GOBP_ORGANIC_ACID_CATABOLIC_PROCESS	GOBP_ORGANIC_ACID_CATABOLIC_PROCESS		47	-0.269723	-0.92048	0.623218	0.956693	1	365	tags=23%, list=13%, signal=27%
GOBP_CILIUM_ORGANIZATION	GOBP_CILIUM_ORGANIZATION		53	-0.244205	-0.918888	0.625483	0.959704	1	385	tags=19%, list=14%, signal=22%
GOBP_REGULATION_OF_MEMBRANE_POTENTIAL	GOBP_REGULATION_OF_MEMBRANE_POTENTIAL		104	-0.21409	-0.91876	0.658869	0.95834	1	771	tags=32%, list=28%, signal=43%
GOMF_PHOSPHATIDYLINOSITOL_BINDING	GOMF_PHOSPHATIDYLINOSITOL_BINDING		50	-0.267708	-0.918186	0.596078	0.958297	1	414	tags=26%, list=15%, signal=30%
GOBP_STEROL_BIOSYNTHETIC_PROCESS	GOBP_STEROL_BIOSYNTHETIC_PROCESS		21	-0.327177	-0.918064	0.596529	0.956918	1	914	tags=62%, list=34%, signal=92%
GOBP_REGULATION_OF_MUSCLE_HYPERTROPHY	GOBP_REGULATION_OF_MUSCLE_HYPERTROPHY		15	-0.314831	-0.917955	0.57002	0.955486	1	457	tags=27%, list=17%, signal=32%
GOBP_NEGATIVE_REGULATION_OF_MOLECULAR_FUNCTION	GOBP_NEGATIVE_REGULATION_OF_MOLECULAR_FUNCTION		183	-0.204616	-0.916382	0.67387	0.958482	1	457	tags=19%, list=17%, signal=21%
GOBP_POSITIVE_REGULATION_OF_CANONICAL_WNT_SIGNALING_PATHWAY	GOBP_POSITIVE_REGULATION_OF_CANONICAL_WNT_SIGNALING_PATHWAY		27	-0.293427	-0.916149	0.569937	0.957446	1	433	tags=26%, list=16%, signal=31%
GOBP_CELLULAR_TRANSITION_METAL_ION_HOMEOSTASIS	GOBP_CELLULAR_TRANSITION_METAL_ION_HOMEOSTASIS		22	-0.319486	-0.915789	0.574152	0.956708	1	560	tags=36%, list=21%, signal=45%
GOBP_MEMBRANE_FUSION	GOBP_MEMBRANE_FUSION		36	-0.263509	-0.915504	0.59743	0.955808	1	471	tags=31%, list=17%, signal=36%
GOMF_ENZYME_INHIBITOR_ACTIVITY	GOMF_ENZYME_INHIBITOR_ACTIVITY		54	-0.255646	-0.915433	0.612524	0.954297	1	483	tags=26%, list=18%, signal=31%
GOMF_ION_CHANNEL_BINDING	GOMF_ION_CHANNEL_BINDING		32	-0.26337	-0.915093	0.584158	0.953581	1	655	tags=31%, list=24%, signal=41%
GOBP_DEVELOPMENTAL_CELL_GROWTH	GOBP_DEVELOPMENTAL_CELL_GROWTH		56	-0.242122	-0.914967	0.587398	0.952253	1	400	tags=23%, list=15%, signal=27%
GOBP_COLLAGEN_METABOLIC_PROCESS	GOBP_COLLAGEN_METABOLIC_PROCESS		19	-0.329079	-0.913414	0.59465	0.955189	1	649	tags=32%, list=24%, signal=41%
GOMF_UBIQUITIN_LIKE_PROTEIN_LIGASE_BINDING	GOMF_UBIQUITIN_LIKE_PROTEIN_LIGASE_BINDING		71	-0.232736	-0.913127	0.57515	0.954316	1	597	tags=24%, list=22%, signal=30%
GOBP_CELLULAR_COMPONENT_MORPHOGENESIS	GOBP_CELLULAR_COMPONENT_MORPHOGENESIS		203	-0.201285	-0.911595	0.682975	0.957151	1	591	tags=23%, list=22%, signal=27%
GOBP_RESPONSE_TO_KETONE	GOBP_RESPONSE_TO_KETONE		48	-0.261404	-0.911249	0.632094	0.956568	1	415	tags=21%, list=15%, signal=24%
GOBP_FERTILIZATION	GOBP_FERTILIZATION		29	-0.280225	-0.910974	0.587891	0.955643	1	882	tags=41%, list=32%, signal=61%
GOMF_CATALYTIC_ACTIVITY_ACTING_ON_RNA	GOMF_CATALYTIC_ACTIVITY_ACTING_ON_RNA		47	-0.242371	-0.910958	0.608434	0.953987	1	305	tags=17%, list=11%, signal=19%
GOBP_REGULATION_OF_CELLULAR_RESPONSE_TO_HEAT	GOBP_REGULATION_OF_CELLULAR_RESPONSE_TO_HEAT		24	-0.29089	-0.910307	0.579268	0.954276	1	435	tags=33%, list=16%, signal=39%
GOMF_METALLOPEPTIDASE_ACTIVITY	GOMF_METALLOPEPTIDASE_ACTIVITY		40	-0.279748	-0.910134	0.674897	0.953028	1	515	tags=25%, list=19%, signal=30%
GOBP_REGULATION_OF_SECRETION	GOBP_REGULATION_OF_SECRETION		127	-0.216531	-0.909595	0.706693	0.952979	1	481	tags=22%, list=18%, signal=26%
GOBP_INORGANIC_ION_IMPORT_ACROSS_PLASMA_MEMBRANE	GOBP_INORGANIC_ION_IMPORT_ACROSS_PLASMA_MEMBRANE		28	-0.267844	-0.905074	0.618474	0.964816	1	733	tags=32%, list=27%, signal=44%
GOBP_CELLULAR_CARBOHYDRATE_METABOLIC_PROCESS	GOBP_CELLULAR_CARBOHYDRATE_METABOLIC_PROCESS		71	-0.264751	-0.90492	0.623984	0.963566	1	453	tags=27%, list=17%, signal=31%
GOBP_CELL_CELL_SIGNALING	GOBP_CELL_CELL_SIGNALING		346	-0.19098	-0.904788	0.793852	0.962247	1	799	tags=31%, list=29%, signal=38%
GOBP_NEGATIVE_REGULATION_OF_PROTEIN_MODIFICATION_PROCESS	GOBP_NEGATIVE_REGULATION_OF_PROTEIN_MODIFICATION_PROCESS		106	-0.21278	-0.904311	0.688129	0.962029	1	385	tags=17%, list=14%, signal=19%
GOBP_REGULATION_OF_PEPTIDE_HORMONE_SECRETION	GOBP_REGULATION_OF_PEPTIDE_HORMONE_SECRETION		42	-0.259498	-0.904306	0.580838	0.960343	1	692	tags=31%, list=25%, signal=41%
GOMF_HYDROLASE_ACTIVITY_ACTING_ON_CARBON_NITROGEN_BUT_NOT_PEPTIDE_BONDS_IN_LINEAR_AMIDES	GOMF_HYDROLASE_ACTIVITY_ACTING_ON_CARBON_NITROGEN_BUT_NOT_PEPTIDE_BONDS_IN_LINEAR_AMIDES		17	-0.331447	-0.903526	0.588115	0.960948	1	170	tags=24%, list=6%, signal=25%
GOBP_BODY_FLUID_SECRETION	GOBP_BODY_FLUID_SECRETION		16	-0.364947	-0.903439	0.591837	0.959493	1	3	tags=6%, list=0%, signal=6%
GOBP_ENDOCYTOSIS	GOBP_ENDOCYTOSIS		123	-0.209952	-0.90342	0.66129	0.957869	1	340	tags=14%, list=12%, signal=15%
GOBP_DETOXIFICATION	GOBP_DETOXIFICATION		18	-0.350691	-0.903163	0.590998	0.956917	1	398	tags=28%, list=15%, signal=32%
GOBP_POTASSIUM_ION_IMPORT_ACROSS_PLASMA_MEMBRANE	GOBP_POTASSIUM_ION_IMPORT_ACROSS_PLASMA_MEMBRANE		16	-0.306998	-0.902709	0.634096	0.956616	1	604	tags=25%, list=22%, signal=32%
GOBP_REGULATION_OF_JNK_CASCADE	GOBP_REGULATION_OF_JNK_CASCADE		29	-0.284052	-0.901878	0.63786	0.957461	1	290	tags=17%, list=11%, signal=19%
GOBP_NEGATIVE_REGULATION_OF_PEPTIDASE_ACTIVITY	GOBP_NEGATIVE_REGULATION_OF_PEPTIDASE_ACTIVITY		32	-0.27966	-0.899927	0.609562	0.961356	1	839	tags=44%, list=31%, signal=62%
GOBP_HEAD_DEVELOPMENT	GOBP_HEAD_DEVELOPMENT		168	-0.212138	-0.898915	0.710983	0.96267	1	712	tags=35%, list=26%, signal=44%
GOBP_CELL_SURFACE_RECEPTOR_SIGNALING_PATHWAY_INVOLVED_IN_CELL_CELL_SIGNALING	GOBP_CELL_SURFACE_RECEPTOR_SIGNALING_PATHWAY_INVOLVED_IN_CELL_CELL_SIGNALING		122	-0.218214	-0.897571	0.668639	0.964973	1	1022	tags=45%, list=38%, signal=69%
GOMF_SECONDARY_ACTIVE_TRANSMEMBRANE_TRANSPORTER_ACTIVITY	GOMF_SECONDARY_ACTIVE_TRANSMEMBRANE_TRANSPORTER_ACTIVITY		60	-0.256548	-0.897052	0.730159	0.964846	1	596	tags=23%, list=22%, signal=29%
GOBP_REGULATION_OF_STRIATED_MUSCLE_CELL_DIFFERENTIATION	GOBP_REGULATION_OF_STRIATED_MUSCLE_CELL_DIFFERENTIATION		20	-0.324137	-0.897034	0.611227	0.963229	1	457	tags=40%, list=17%, signal=48%
GOBP_PLATELET_ACTIVATION	GOBP_PLATELET_ACTIVATION		46	-0.260661	-0.896248	0.58483	0.963735	1	409	tags=15%, list=15%, signal=18%
GOBP_REGULATION_OF_INTRACELLULAR_STEROID_HORMONE_RECEPTOR_SIGNALING_PATHWAY	GOBP_REGULATION_OF_INTRACELLULAR_STEROID_HORMONE_RECEPTOR_SIGNALING_PATHWAY		15	-0.316187	-0.895841	0.620079	0.963217	1	369	tags=27%, list=14%, signal=31%
GOBP_GLIAL_CELL_DIFFERENTIATION	GOBP_GLIAL_CELL_DIFFERENTIATION		52	-0.230563	-0.895663	0.660749	0.962075	1	602	tags=27%, list=22%, signal=34%
GOBP_STEM_CELL_PROLIFERATION	GOBP_STEM_CELL_PROLIFERATION		18	-0.317378	-0.895395	0.598	0.961125	1	300	tags=22%, list=11%, signal=25%
GOBP_CARBOHYDRATE_HOMEOSTASIS	GOBP_CARBOHYDRATE_HOMEOSTASIS		45	-0.266642	-0.895353	0.634819	0.959588	1	145	tags=11%, list=5%, signal=12%
GOBP_MUSCLE_SYSTEM_PROCESS	GOBP_MUSCLE_SYSTEM_PROCESS		109	-0.220215	-0.894872	0.649899	0.959289	1	516	tags=22%, list=19%, signal=26%
GOMF_SYMPORTER_ACTIVITY	GOMF_SYMPORTER_ACTIVITY		37	-0.298079	-0.89386	0.672165	0.960531	1	596	tags=27%, list=22%, signal=34%
GOBP_DENDRITIC_SPINE_MORPHOGENESIS	GOBP_DENDRITIC_SPINE_MORPHOGENESIS		19	-0.318556	-0.892935	0.600815	0.961534	1	274	tags=16%, list=10%, signal=17%
GOBP_CANONICAL_WNT_SIGNALING_PATHWAY	GOBP_CANONICAL_WNT_SIGNALING_PATHWAY		72	-0.239508	-0.891455	0.639604	0.964214	1	938	tags=43%, list=34%, signal=64%
GOMF_HEAT_SHOCK_PROTEIN_BINDING	GOMF_HEAT_SHOCK_PROTEIN_BINDING		28	-0.271774	-0.88983	0.62766	0.967298	1	538	tags=36%, list=20%, signal=44%
GOBP_REGULATION_OF_CELL_DEATH	GOBP_REGULATION_OF_CELL_DEATH		332	-0.192724	-0.888927	0.787819	0.968273	1	457	tags=17%, list=17%, signal=18%
GOBP_REGULATION_OF_CELL_PROJECTION_ORGANIZATION	GOBP_REGULATION_OF_CELL_PROJECTION_ORGANIZATION		149	-0.205789	-0.888287	0.700971	0.968452	1	402	tags=18%, list=15%, signal=20%
GOMF_TRANSPORTER_ACTIVITY	GOMF_TRANSPORTER_ACTIVITY		235	-0.199181	-0.887793	0.843373	0.968185	1	667	tags=27%, list=24%, signal=32%
GOBP_ANIMAL_ORGAN_REGENERATION	GOBP_ANIMAL_ORGAN_REGENERATION		15	-0.304844	-0.887615	0.614	0.967088	1	60	tags=13%, list=2%, signal=14%
GOBP_PROTEIN_PROCESSING	GOBP_PROTEIN_PROCESSING		45	-0.244855	-0.886574	0.719608	0.968345	1	112	tags=11%, list=4%, signal=11%
GOBP_PROTEIN_PHOSPHOPANTETHEINYLATION	GOBP_PROTEIN_PHOSPHOPANTETHEINYLATION		51	-0.269254	-0.886397	0.656064	0.967156	1	345	tags=22%, list=13%, signal=24%
GOBP_REGULATION_OF_LYMPHOCYTE_MEDIATED_IMMUNITY	GOBP_REGULATION_OF_LYMPHOCYTE_MEDIATED_IMMUNITY		18	-0.295368	-0.885146	0.633197	0.969	1	608	tags=33%, list=22%, signal=43%
GOBP_CELLULAR_HOMEOSTASIS	GOBP_CELLULAR_HOMEOSTASIS		161	-0.205154	-0.883526	0.736142	0.971814	1	504	tags=19%, list=19%, signal=22%
GOBP_POSITIVE_REGULATION_OF_MOLECULAR_FUNCTION	GOBP_POSITIVE_REGULATION_OF_MOLECULAR_FUNCTION		370	-0.185311	-0.882466	0.826772	0.973067	1	328	tags=12%, list=12%, signal=12%
GOCC_MITOTIC_SPINDLE	GOCC_MITOTIC_SPINDLE		32	-0.273436	-0.881762	0.638298	0.973398	1	482	tags=22%, list=18%, signal=26%
GOBP_CELL_RECOGNITION	GOBP_CELL_RECOGNITION		24	-0.292231	-0.881233	0.620902	0.973235	1	894	tags=50%, list=33%, signal=74%
GOMF_SOLUTE_CATION_SYMPORTER_ACTIVITY	GOMF_SOLUTE_CATION_SYMPORTER_ACTIVITY		31	-0.302995	-0.881198	0.687885	0.971693	1	596	tags=29%, list=22%, signal=37%
GOBP_MEMBRANE_DOCKING	GOBP_MEMBRANE_DOCKING		32	-0.241831	-0.880787	0.647638	0.971193	1	213	tags=13%, list=8%, signal=13%
GOBP_ESTABLISHMENT_OF_PROTEIN_LOCALIZATION_TO_MEMBRANE	GOBP_ESTABLISHMENT_OF_PROTEIN_LOCALIZATION_TO_MEMBRANE		81	-0.176704	-0.880742	0.623552	0.969696	1	737	tags=25%, list=27%, signal=33%
GOBP_NUCLEOSIDE_METABOLIC_PROCESS	GOBP_NUCLEOSIDE_METABOLIC_PROCESS		23	-0.255114	-0.879222	0.633833	0.972235	1	310	tags=17%, list=11%, signal=19%
GOBP_PLATELET_DEGRANULATION	GOBP_PLATELET_DEGRANULATION		27	-0.269829	-0.876384	0.629328	0.978425	1	679	tags=33%, list=25%, signal=44%
GOBP_CELLULAR_RESPONSE_TO_NITROGEN_COMPOUND	GOBP_CELLULAR_RESPONSE_TO_NITROGEN_COMPOUND		150	-0.205139	-0.876135	0.702756	0.97747	1	393	tags=15%, list=14%, signal=17%
GOBP_INORGANIC_ANION_TRANSMEMBRANE_TRANSPORT	GOBP_INORGANIC_ANION_TRANSMEMBRANE_TRANSPORT		27	-0.284215	-0.87531	0.681542	0.978069	1	718	tags=33%, list=26%, signal=45%
GOMF_ALCOHOL_BINDING	GOMF_ALCOHOL_BINDING		18	-0.333486	-0.874575	0.654297	0.978396	1	259	tags=28%, list=10%, signal=30%
GOBP_CAMERA_TYPE_EYE_MORPHOGENESIS	GOBP_CAMERA_TYPE_EYE_MORPHOGENESIS		30	-0.275632	-0.873662	0.69434	0.979236	1	214	tags=20%, list=8%, signal=21%
GOBP_MULTICELLULAR_ORGANISMAL_SIGNALING	GOBP_MULTICELLULAR_ORGANISMAL_SIGNALING		55	-0.231087	-0.873603	0.669811	0.977782	1	799	tags=35%, list=29%, signal=48%
GOBP_REGULATION_OF_PROTEOLYSIS	GOBP_REGULATION_OF_PROTEOLYSIS		141	-0.187274	-0.873506	0.767857	0.976429	1	338	tags=14%, list=12%, signal=15%
GOBP_RESPONSE_TO_CARBOHYDRATE	GOBP_RESPONSE_TO_CARBOHYDRATE		46	-0.26406	-0.873387	0.686992	0.975146	1	492	tags=22%, list=18%, signal=26%
GOBP_POSITIVE_REGULATION_OF_PROTEIN_MODIFICATION_PROCESS	GOBP_POSITIVE_REGULATION_OF_PROTEIN_MODIFICATION_PROCESS		218	-0.192289	-0.873269	0.810309	0.973853	1	641	tags=25%, list=24%, signal=30%
GOBP_PROTEIN_POLYMERIZATION	GOBP_PROTEIN_POLYMERIZATION		65	-0.233974	-0.872872	0.663265	0.973323	1	384	tags=22%, list=14%, signal=24%
GOBP_FIBROBLAST_MIGRATION	GOBP_FIBROBLAST_MIGRATION		15	-0.314765	-0.871922	0.605809	0.974341	1	542	tags=40%, list=20%, signal=50%
GOBP_PROTEIN_MATURATION	GOBP_PROTEIN_MATURATION		51	-0.226276	-0.87179	0.764368	0.973108	1	112	tags=10%, list=4%, signal=10%
GOBP_POSITIVE_REGULATION_OF_MAP_KINASE_ACTIVITY	GOBP_POSITIVE_REGULATION_OF_MAP_KINASE_ACTIVITY		51	-0.248652	-0.871731	0.671429	0.971696	1	407	tags=18%, list=15%, signal=20%
GOBP_REGULATION_OF_AXONOGENESIS	GOBP_REGULATION_OF_AXONOGENESIS		44	-0.245753	-0.871317	0.68815	0.971204	1	400	tags=23%, list=15%, signal=26%
GOCC_GLUTAMATERGIC_SYNAPSE	GOCC_GLUTAMATERGIC_SYNAPSE		69	-0.232737	-0.869835	0.695896	0.973494	1	788	tags=39%, list=29%, signal=54%
GOBP_PROTEIN_MODIFICATION_BY_SMALL_PROTEIN_CONJUGATION_OR_REMOVAL	GOBP_PROTEIN_MODIFICATION_BY_SMALL_PROTEIN_CONJUGATION_OR_REMOVAL		217	-0.187187	-0.86949	0.723926	0.972849	1	338	tags=13%, list=12%, signal=14%
GOBP_CHEMICAL_HOMEOSTASIS	GOBP_CHEMICAL_HOMEOSTASIS		214	-0.194493	-0.867738	0.820129	0.976158	1	504	tags=20%, list=19%, signal=22%
GOMF_KINASE_ACTIVITY	GOMF_KINASE_ACTIVITY		177	-0.205053	-0.867496	0.777311	0.975233	1	602	tags=27%, list=22%, signal=33%
GOCC_POSTSYNAPSE	GOCC_POSTSYNAPSE		150	-0.190035	-0.867404	0.756286	0.973899	1	891	tags=42%, list=33%, signal=59%
GOBP_POST_TRANSLATIONAL_PROTEIN_MODIFICATION	GOBP_POST_TRANSLATIONAL_PROTEIN_MODIFICATION		60	-0.232584	-0.867113	0.695825	0.973112	1	394	tags=15%, list=14%, signal=17%
GOBP_REGULATION_OF_CELLULAR_PROTEIN_CATABOLIC_PROCESS	GOBP_REGULATION_OF_CELLULAR_PROTEIN_CATABOLIC_PROCESS		61	-0.213442	-0.867008	0.667347	0.971836	1	338	tags=15%, list=12%, signal=16%
GOMF_CYTOKINE_RECEPTOR_ACTIVITY	GOMF_CYTOKINE_RECEPTOR_ACTIVITY		21	-0.294502	-0.863167	0.674134	0.980368	1	569	tags=24%, list=21%, signal=30%
GOBP_POSITIVE_REGULATION_OF_DNA_BINDING_TRANSCRIPTION_FACTOR_ACTIVITY	GOBP_POSITIVE_REGULATION_OF_DNA_BINDING_TRANSCRIPTION_FACTOR_ACTIVITY		60	-0.22304	-0.862981	0.666667	0.979248	1	496	tags=20%, list=18%, signal=24%
GOBP_REGULATION_OF_MICROTUBULE_BASED_PROCESS	GOBP_REGULATION_OF_MICROTUBULE_BASED_PROCESS		48	-0.235589	-0.861702	0.679134	0.981054	1	385	tags=19%, list=14%, signal=21%
GOBP_POSITIVE_REGULATION_OF_NUCLEOTIDE_METABOLIC_PROCESS	GOBP_POSITIVE_REGULATION_OF_NUCLEOTIDE_METABOLIC_PROCESS		19	-0.342242	-0.861507	0.661323	0.979981	1	133	tags=16%, list=5%, signal=16%
GOBP_CELLULAR_RESPONSE_TO_ORGANIC_CYCLIC_COMPOUND	GOBP_CELLULAR_RESPONSE_TO_ORGANIC_CYCLIC_COMPOUND		112	-0.209985	-0.860824	0.75534	0.98012	1	415	tags=17%, list=15%, signal=19%
GOMF_CHANNEL_REGULATOR_ACTIVITY	GOMF_CHANNEL_REGULATOR_ACTIVITY		31	-0.256976	-0.860583	0.684109	0.979191	1	604	tags=32%, list=22%, signal=41%
GOBP_POSITIVE_REGULATION_OF_PROTEIN_POLYMERIZATION	GOBP_POSITIVE_REGULATION_OF_PROTEIN_POLYMERIZATION		27	-0.303124	-0.859496	0.660714	0.980364	1	516	tags=33%, list=19%, signal=41%
GOBP_POSITIVE_REGULATION_OF_CELL_ACTIVATION	GOBP_POSITIVE_REGULATION_OF_CELL_ACTIVATION		53	-0.249146	-0.858868	0.667347	0.980494	1	231	tags=11%, list=8%, signal=12%
GOBP_NEURON_PROJECTION_ORGANIZATION	GOBP_NEURON_PROJECTION_ORGANIZATION		26	-0.279847	-0.857932	0.67623	0.981303	1	282	tags=15%, list=10%, signal=17%
GOBP_POSITIVE_REGULATION_OF_CELL_MORPHOGENESIS_INVOLVED_IN_DIFFERENTIATION	GOBP_POSITIVE_REGULATION_OF_CELL_MORPHOGENESIS_INVOLVED_IN_DIFFERENTIATION		19	-0.298272	-0.857773	0.681275	0.980177	1	618	tags=32%, list=23%, signal=41%
GOBP_CELLULAR_GLUCOSE_HOMEOSTASIS	GOBP_CELLULAR_GLUCOSE_HOMEOSTASIS		29	-0.281145	-0.857569	0.703781	0.979169	1	474	tags=21%, list=17%, signal=25%
GOCC_PHOTORECEPTOR_OUTER_SEGMENT	GOCC_PHOTORECEPTOR_OUTER_SEGMENT		15	-0.359537	-0.85698	0.688235	0.979221	1	154	tags=13%, list=6%, signal=14%
GOBP_POSITIVE_REGULATION_OF_PROTEIN_CATABOLIC_PROCESS	GOBP_POSITIVE_REGULATION_OF_PROTEIN_CATABOLIC_PROCESS		46	-0.241479	-0.856833	0.665996	0.978015	1	338	tags=17%, list=12%, signal=20%
GOBP_EPITHELIAL_CELL_APOPTOTIC_PROCESS	GOBP_EPITHELIAL_CELL_APOPTOTIC_PROCESS		21	-0.278788	-0.856602	0.700197	0.977047	1	396	tags=24%, list=15%, signal=28%
GOBP_SKIN_EPIDERMIS_DEVELOPMENT	GOBP_SKIN_EPIDERMIS_DEVELOPMENT		17	-0.294139	-0.856066	0.709302	0.976856	1	457	tags=24%, list=17%, signal=28%
GOBP_MAPK_CASCADE	GOBP_MAPK_CASCADE		190	-0.196902	-0.856034	0.814516	0.975406	1	407	tags=17%, list=15%, signal=18%
GOBP_REGULATION_OF_CELLULAR_COMPONENT_SIZE	GOBP_REGULATION_OF_CELLULAR_COMPONENT_SIZE		90	-0.214562	-0.85601	0.738589	0.973959	1	435	tags=20%, list=16%, signal=23%
GOBP_PROTEIN_STABILIZATION	GOBP_PROTEIN_STABILIZATION		47	-0.245211	-0.856004	0.652427	0.972454	1	696	tags=28%, list=26%, signal=37%
GOCC_APICAL_PART_OF_CELL	GOCC_APICAL_PART_OF_CELL		88	-0.221024	-0.85451	0.799595	0.974797	1	174	tags=8%, list=6%, signal=8%
GOBP_PROTEIN_LOCALIZATION_TO_ORGANELLE	GOBP_PROTEIN_LOCALIZATION_TO_ORGANELLE		210	-0.173317	-0.852887	0.736308	0.977352	1	413	tags=15%, list=15%, signal=17%
GOBP_POSITIVE_REGULATION_OF_CELL_CYCLE_ARREST	GOBP_POSITIVE_REGULATION_OF_CELL_CYCLE_ARREST		16	-0.337085	-0.852722	0.683267	0.976243	1	407	tags=44%, list=15%, signal=51%
GOBP_POSITIVE_REGULATION_OF_CELL_DEVELOPMENT	GOBP_POSITIVE_REGULATION_OF_CELL_DEVELOPMENT		71	-0.224154	-0.851544	0.716599	0.977743	1	664	tags=31%, list=24%, signal=40%
GOBP_REGULATION_OF_MAPK_CASCADE	GOBP_REGULATION_OF_MAPK_CASCADE		140	-0.20667	-0.850223	0.828694	0.979552	1	407	tags=18%, list=15%, signal=20%
GOBP_RENAL_TUBULE_DEVELOPMENT	GOBP_RENAL_TUBULE_DEVELOPMENT		19	-0.290373	-0.845871	0.691849	0.988878	1	516	tags=26%, list=19%, signal=32%
GOBP_REGULATION_OF_SODIUM_ION_TRANSPORT	GOBP_REGULATION_OF_SODIUM_ION_TRANSPORT		22	-0.274571	-0.845014	0.716446	0.989563	1	555	tags=27%, list=20%, signal=34%
GOBP_RESPONSE_TO_MONOSACCHARIDE	GOBP_RESPONSE_TO_MONOSACCHARIDE		39	-0.260713	-0.844067	0.735812	0.990314	1	492	tags=21%, list=18%, signal=25%
GOBP_POSITIVE_REGULATION_OF_AXON_EXTENSION	GOBP_POSITIVE_REGULATION_OF_AXON_EXTENSION		16	-0.296256	-0.843866	0.675676	0.989258	1	369	tags=25%, list=14%, signal=29%
GOBP_MEMBRANE_DEPOLARIZATION_DURING_ACTION_POTENTIAL	GOBP_MEMBRANE_DEPOLARIZATION_DURING_ACTION_POTENTIAL		15	-0.307354	-0.842879	0.683019	0.990266	1	733	tags=47%, list=27%, signal=63%
GOBP_LONG_TERM_SYNAPTIC_POTENTIATION	GOBP_LONG_TERM_SYNAPTIC_POTENTIATION		21	-0.26339	-0.842251	0.707415	0.990178	1	299	tags=14%, list=11%, signal=16%
GOBP_COPII_COATED_VESICLE_BUDDING	GOBP_COPII_COATED_VESICLE_BUDDING		16	-0.268996	-0.840351	0.647917	0.993291	1	993	tags=63%, list=36%, signal=98%
GOBP_CARDIAC_MUSCLE_CELL_ACTION_POTENTIAL_INVOLVED_IN_CONTRACTION	GOBP_CARDIAC_MUSCLE_CELL_ACTION_POTENTIAL_INVOLVED_IN_CONTRACTION		15	-0.300632	-0.838512	0.702595	0.996174	1	733	tags=40%, list=27%, signal=54%
GOCC_DENDRITIC_TREE	GOCC_DENDRITIC_TREE		137	-0.206283	-0.837921	0.780156	0.996131	1	897	tags=39%, list=33%, signal=55%
GOBP_DNA_MODIFICATION	GOBP_DNA_MODIFICATION		16	-0.309449	-0.837464	0.696774	0.995742	1	268	tags=13%, list=10%, signal=14%
GOBP_ENDOCRINE_PANCREAS_DEVELOPMENT	GOBP_ENDOCRINE_PANCREAS_DEVELOPMENT		15	-0.311845	-0.836068	0.703911	0.997424	1	282	tags=27%, list=10%, signal=30%
GOMF_TRANSCRIPTION_COREGULATOR_BINDING	GOMF_TRANSCRIPTION_COREGULATOR_BINDING		16	-0.285176	-0.833546	0.693182	1	1	396	tags=31%, list=15%, signal=36%
GOMF_VITAMIN_BINDING	GOMF_VITAMIN_BINDING		29	-0.292135	-0.833485	0.767635	1	1	662	tags=38%, list=24%, signal=50%
GOBP_REGULATION_OF_DEPHOSPHORYLATION	GOBP_REGULATION_OF_DEPHOSPHORYLATION		26	-0.280645	-0.833113	0.706931	0.999714	1	534	tags=35%, list=20%, signal=43%
GOMF_TRANSFERASE_ACTIVITY_TRANSFERRING_ACYL_GROUPS	GOMF_TRANSFERASE_ACTIVITY_TRANSFERRING_ACYL_GROUPS		29	-0.266904	-0.832839	0.715447	0.998861	1	327	tags=21%, list=12%, signal=23%
GOBP_POSITIVE_REGULATION_OF_LEUKOCYTE_CELL_CELL_ADHESION	GOBP_POSITIVE_REGULATION_OF_LEUKOCYTE_CELL_CELL_ADHESION		46	-0.249748	-0.832635	0.726358	0.997806	1	231	tags=13%, list=8%, signal=14%
GOBP_PROTEOGLYCAN_METABOLIC_PROCESS	GOBP_PROTEOGLYCAN_METABOLIC_PROCESS		24	-0.26274	-0.831377	0.711967	0.999165	1	639	tags=29%, list=23%, signal=38%
GOBP_POSITIVE_REGULATION_OF_PROTEIN_SERINE_THREONINE_KINASE_ACTIVITY	GOBP_POSITIVE_REGULATION_OF_PROTEIN_SERINE_THREONINE_KINASE_ACTIVITY		62	-0.225314	-0.830713	0.778004	0.999273	1	407	tags=18%, list=15%, signal=20%
GOBP_RESPONSE_TO_ESTRADIOL	GOBP_RESPONSE_TO_ESTRADIOL		29	-0.287479	-0.830112	0.694093	0.999183	1	86	tags=7%, list=3%, signal=7%
GOBP_POSITIVE_REGULATION_OF_DNA_METABOLIC_PROCESS	GOBP_POSITIVE_REGULATION_OF_DNA_METABOLIC_PROCESS		34	-0.234049	-0.82808	0.714286	1	1	81	tags=6%, list=3%, signal=6%
GOCC_PIGMENT_GRANULE	GOCC_PIGMENT_GRANULE		25	-0.264919	-0.827848	0.698039	1	1	279	tags=16%, list=10%, signal=18%
GOBP_REGULATION_OF_ACTIN_FILAMENT_LENGTH	GOBP_REGULATION_OF_ACTIN_FILAMENT_LENGTH		40	-0.259707	-0.827767	0.723866	0.999981	1	575	tags=33%, list=21%, signal=41%
GOCC_PLASMA_MEMBRANE_REGION	GOCC_PLASMA_MEMBRANE_REGION		284	-0.183384	-0.825195	0.945783	1	1	596	tags=22%, list=22%, signal=25%
GOBP_RESPONSE_TO_TOXIC_SUBSTANCE	GOBP_RESPONSE_TO_TOXIC_SUBSTANCE		44	-0.254222	-0.823116	0.774757	1	1	399	tags=18%, list=15%, signal=21%
GOBP_MUSCLE_CELL_DEVELOPMENT	GOBP_MUSCLE_CELL_DEVELOPMENT		43	-0.243222	-0.822867	0.752032	1	1	492	tags=28%, list=18%, signal=34%
GOBP_DEVELOPMENTAL_MATURATION	GOBP_DEVELOPMENTAL_MATURATION		43	-0.232568	-0.822793	0.776824	1	1	298	tags=14%, list=11%, signal=15%
GOBP_REGULATION_OF_PROTEIN_STABILITY	GOBP_REGULATION_OF_PROTEIN_STABILITY		69	-0.215527	-0.821441	0.706693	1	1	696	tags=29%, list=26%, signal=38%
GOBP_POSITIVE_REGULATION_OF_NEURON_PROJECTION_DEVELOPMENT	GOBP_POSITIVE_REGULATION_OF_NEURON_PROJECTION_DEVELOPMENT		35	-0.229957	-0.821379	0.745731	1	1	368	tags=14%, list=14%, signal=16%
GOCC_COATED_VESICLE_MEMBRANE	GOCC_COATED_VESICLE_MEMBRANE		34	-0.221865	-0.821081	0.716832	1	1	509	tags=18%, list=19%, signal=21%
GOBP_MEMBRANE_DEPOLARIZATION	GOBP_MEMBRANE_DEPOLARIZATION		29	-0.249437	-0.820781	0.730402	1	1	737	tags=38%, list=27%, signal=51%
GOBP_REGULATION_OF_LEUKOCYTE_MEDIATED_IMMUNITY	GOBP_REGULATION_OF_LEUKOCYTE_MEDIATED_IMMUNITY		29	-0.251989	-0.819006	0.728778	1	1	608	tags=28%, list=22%, signal=35%
GOBP_TUMOR_NECROSIS_FACTOR_SUPERFAMILY_CYTOKINE_PRODUCTION	GOBP_TUMOR_NECROSIS_FACTOR_SUPERFAMILY_CYTOKINE_PRODUCTION		27	-0.254894	-0.818833	0.70894	1	1	156	tags=7%, list=6%, signal=8%
GOBP_VITAMIN_METABOLIC_PROCESS	GOBP_VITAMIN_METABOLIC_PROCESS		23	-0.265344	-0.818743	0.762089	1	1	512	tags=30%, list=19%, signal=37%
GOBP_REGULATION_OF_PROTEIN_ACETYLATION	GOBP_REGULATION_OF_PROTEIN_ACETYLATION		17	-0.26838	-0.81763	0.723485	1	1	496	tags=18%, list=18%, signal=21%
GOBP_REGULATION_OF_MEMBRANE_PERMEABILITY	GOBP_REGULATION_OF_MEMBRANE_PERMEABILITY		17	-0.264667	-0.817615	0.709302	1	1	756	tags=47%, list=28%, signal=65%
GOBP_APICAL_JUNCTION_ASSEMBLY	GOBP_APICAL_JUNCTION_ASSEMBLY		18	-0.29734	-0.816572	0.717899	1	1	297	tags=17%, list=11%, signal=19%
GOBP_NEURON_DEATH	GOBP_NEURON_DEATH		69	-0.231868	-0.814008	0.781124	1	1	400	tags=20%, list=15%, signal=23%
GOBP_PROTEIN_HOMOOLIGOMERIZATION	GOBP_PROTEIN_HOMOOLIGOMERIZATION		30	-0.245876	-0.812878	0.778252	1	1	1108	tags=60%, list=41%, signal=100%
GOBP_SENSORY_PERCEPTION_OF_MECHANICAL_STIMULUS	GOBP_SENSORY_PERCEPTION_OF_MECHANICAL_STIMULUS		43	-0.223219	-0.811336	0.804223	1	1	106	tags=7%, list=4%, signal=7%
GOCC_RNA_POLYMERASE_COMPLEX	GOCC_RNA_POLYMERASE_COMPLEX		17	-0.278043	-0.810252	0.760915	1	1	631	tags=35%, list=23%, signal=46%
GOBP_POSITIVE_REGULATION_OF_CELL_DIVISION	GOBP_POSITIVE_REGULATION_OF_CELL_DIVISION		19	-0.302562	-0.810122	0.759519	1	1	163	tags=16%, list=6%, signal=17%
GOBP_POSITIVE_REGULATION_OF_ACTIN_FILAMENT_POLYMERIZATION	GOBP_POSITIVE_REGULATION_OF_ACTIN_FILAMENT_POLYMERIZATION		19	-0.295711	-0.809663	0.738703	1	1	516	tags=32%, list=19%, signal=39%
GOBP_NEGATIVE_REGULATION_OF_CELL_PROJECTION_ORGANIZATION	GOBP_NEGATIVE_REGULATION_OF_CELL_PROJECTION_ORGANIZATION		42	-0.223381	-0.807607	0.774067	1	1	894	tags=50%, list=33%, signal=73%
GOCC_LEADING_EDGE_MEMBRANE	GOCC_LEADING_EDGE_MEMBRANE		44	-0.231203	-0.806958	0.808081	1	1	447	tags=18%, list=16%, signal=21%
GOBP_NEGATIVE_REGULATION_OF_RESPONSE_TO_WOUNDING	GOBP_NEGATIVE_REGULATION_OF_RESPONSE_TO_WOUNDING		21	-0.269343	-0.806822	0.769674	1	1	506	tags=24%, list=19%, signal=29%
GOBP_NEGATIVE_REGULATION_OF_NEURON_PROJECTION_DEVELOPMENT	GOBP_NEGATIVE_REGULATION_OF_NEURON_PROJECTION_DEVELOPMENT		33	-0.231953	-0.806717	0.775758	1	1	894	tags=48%, list=33%, signal=71%
GOBP_HEART_PROCESS	GOBP_HEART_PROCESS		67	-0.214252	-0.806226	0.796545	1	1	655	tags=30%, list=24%, signal=38%
GOBP_STEROL_METABOLIC_PROCESS	GOBP_STEROL_METABOLIC_PROCESS		36	-0.258693	-0.805581	0.788913	1	1	530	tags=28%, list=19%, signal=34%
GOCC_NUCLEAR_CHROMOSOME	GOCC_NUCLEAR_CHROMOSOME		42	-0.222932	-0.803351	0.77381	1	1	313	tags=17%, list=11%, signal=19%
GOCC_ADHERENS_JUNCTION	GOCC_ADHERENS_JUNCTION		49	-0.22955	-0.801999	0.843058	1	1	580	tags=27%, list=21%, signal=33%
GOMF_ACTIVE_ION_TRANSMEMBRANE_TRANSPORTER_ACTIVITY	GOMF_ACTIVE_ION_TRANSMEMBRANE_TRANSPORTER_ACTIVITY		54	-0.239946	-0.801676	0.870183	1	1	596	tags=24%, list=22%, signal=30%
GOCC_SARCOLEMMA	GOCC_SARCOLEMMA		34	-0.223991	-0.800537	0.773859	1	1	655	tags=35%, list=24%, signal=46%
GOCC_I_BAND	GOCC_I_BAND		33	-0.223825	-0.800032	0.76673	1	1	655	tags=36%, list=24%, signal=47%
GOBP_NEURON_PROJECTION_GUIDANCE	GOBP_NEURON_PROJECTION_GUIDANCE		75	-0.2062	-0.798978	0.828685	1	1	485	tags=21%, list=18%, signal=25%
GOBP_PHENOL_CONTAINING_COMPOUND_METABOLIC_PROCESS	GOBP_PHENOL_CONTAINING_COMPOUND_METABOLIC_PROCESS		17	-0.300832	-0.798434	0.721374	1	1	8	tags=6%, list=0%, signal=6%
GOBP_REGULATION_OF_VIRAL_GENOME_REPLICATION	GOBP_REGULATION_OF_VIRAL_GENOME_REPLICATION		18	-0.289153	-0.798307	0.741414	1	1	660	tags=39%, list=24%, signal=51%
GOMF_NUCLEAR_RECEPTOR_BINDING	GOMF_NUCLEAR_RECEPTOR_BINDING		21	-0.245952	-0.798226	0.759754	1	1	311	tags=14%, list=11%, signal=16%
GOMF_VOLTAGE_GATED_CATION_CHANNEL_ACTIVITY	GOMF_VOLTAGE_GATED_CATION_CHANNEL_ACTIVITY		35	-0.217204	-0.79607	0.793522	1	1	799	tags=37%, list=29%, signal=52%
GOBP_BEHAVIOR	GOBP_BEHAVIOR		115	-0.191577	-0.795753	0.902196	1	1	438	tags=17%, list=16%, signal=20%
GOBP_MICROTUBULE_BASED_MOVEMENT	GOBP_MICROTUBULE_BASED_MOVEMENT		58	-0.210253	-0.795697	0.787149	1	1	638	tags=26%, list=23%, signal=33%
GOBP_INSULIN_SECRETION	GOBP_INSULIN_SECRETION		41	-0.228938	-0.795509	0.846614	1	1	474	tags=22%, list=17%, signal=26%
GOMF_MODIFIED_AMINO_ACID_BINDING	GOMF_MODIFIED_AMINO_ACID_BINDING		22	-0.264703	-0.795439	0.778672	1	1	623	tags=32%, list=23%, signal=41%
GOBP_RESPONSE_TO_UV	GOBP_RESPONSE_TO_UV		31	-0.217601	-0.795285	0.777778	1	1	122	tags=6%, list=4%, signal=7%
GOMF_AMIDE_BINDING	GOMF_AMIDE_BINDING		71	-0.20678	-0.795207	0.878099	1	1	659	tags=28%, list=24%, signal=36%
GOBP_INNATE_IMMUNE_RESPONSE_ACTIVATING_SIGNAL_TRANSDUCTION	GOBP_INNATE_IMMUNE_RESPONSE_ACTIVATING_SIGNAL_TRANSDUCTION		19	-0.260102	-0.793042	0.697495	1	1	812	tags=42%, list=30%, signal=60%
GOBP_REGULATION_OF_NERVOUS_SYSTEM_PROCESS	GOBP_REGULATION_OF_NERVOUS_SYSTEM_PROCESS		26	-0.254085	-0.792825	0.763636	1	1	568	tags=23%, list=21%, signal=29%
GOBP_MODIFICATION_DEPENDENT_MACROMOLECULE_CATABOLIC_PROCESS	GOBP_MODIFICATION_DEPENDENT_MACROMOLECULE_CATABOLIC_PROCESS		135	-0.173113	-0.792655	0.821782	1	1	654	tags=23%, list=24%, signal=29%
GOBP_PHAGOCYTOSIS	GOBP_PHAGOCYTOSIS		52	-0.220323	-0.790856	0.791667	1	1	402	tags=15%, list=15%, signal=18%
GOBP_CELLULAR_PROTEIN_CATABOLIC_PROCESS	GOBP_CELLULAR_PROTEIN_CATABOLIC_PROCESS		163	-0.173024	-0.790501	0.824131	1	1	419	tags=15%, list=15%, signal=16%
GOMF_STEROID_HORMONE_RECEPTOR_BINDING	GOMF_STEROID_HORMONE_RECEPTOR_BINDING		16	-0.251438	-0.789416	0.776639	1	1	53	tags=6%, list=2%, signal=6%
GOBP_TRANSITION_METAL_ION_HOMEOSTASIS	GOBP_TRANSITION_METAL_ION_HOMEOSTASIS		25	-0.259503	-0.789362	0.777542	1	1	469	tags=28%, list=17%, signal=34%
GOCC_CYTOSOLIC_LARGE_RIBOSOMAL_SUBUNIT	GOCC_CYTOSOLIC_LARGE_RIBOSOMAL_SUBUNIT		17	-0.261544	-0.788524	0.806706	1	1	2017	tags=100%, list=74%, signal=383%
GOMF_PROTEIN_KINASE_ACTIVITY	GOMF_PROTEIN_KINASE_ACTIVITY		148	-0.192557	-0.787278	0.905155	1	1	602	tags=27%, list=22%, signal=33%
GOBP_LEUKOCYTE_MEDIATED_CYTOTOXICITY	GOBP_LEUKOCYTE_MEDIATED_CYTOTOXICITY		16	-0.293181	-0.78623	0.747934	1	1	608	tags=25%, list=22%, signal=32%
GOBP_REGULATION_OF_MICROTUBULE_POLYMERIZATION	GOBP_REGULATION_OF_MICROTUBULE_POLYMERIZATION		15	-0.286838	-0.785212	0.770325	1	1	369	tags=27%, list=14%, signal=31%
GOCC_CELL_CELL_CONTACT_ZONE	GOCC_CELL_CELL_CONTACT_ZONE		22	-0.273766	-0.785198	0.784736	1	1	655	tags=45%, list=24%, signal=59%
GOBP_CELLULAR_ION_HOMEOSTASIS	GOBP_CELLULAR_ION_HOMEOSTASIS		109	-0.185061	-0.784702	0.917197	1	1	504	tags=19%, list=19%, signal=23%
GOBP_PROTEIN_CATABOLIC_PROCESS	GOBP_PROTEIN_CATABOLIC_PROCESS		189	-0.165031	-0.784501	0.898636	1	1	423	tags=15%, list=16%, signal=17%
GOBP_REGULATION_OF_MICROTUBULE_CYTOSKELETON_ORGANIZATION	GOBP_REGULATION_OF_MICROTUBULE_CYTOSKELETON_ORGANIZATION		34	-0.24395	-0.781889	0.8	1	1	385	tags=21%, list=14%, signal=24%
GOBP_NEGATIVE_REGULATION_OF_DNA_BINDING_TRANSCRIPTION_FACTOR_ACTIVITY	GOBP_NEGATIVE_REGULATION_OF_DNA_BINDING_TRANSCRIPTION_FACTOR_ACTIVITY		23	-0.258769	-0.779342	0.830957	1	1	237	tags=17%, list=9%, signal=19%
GOMF_PASSIVE_TRANSMEMBRANE_TRANSPORTER_ACTIVITY	GOMF_PASSIVE_TRANSMEMBRANE_TRANSPORTER_ACTIVITY		94	-0.19129	-0.778938	0.924025	1	1	737	tags=30%, list=27%, signal=39%
GOCC_SPINDLE_POLE	GOCC_SPINDLE_POLE		31	-0.260617	-0.777668	0.821643	1	1	622	tags=35%, list=23%, signal=45%
GOMF_MICROTUBULE_BINDING	GOMF_MICROTUBULE_BINDING		48	-0.209746	-0.776089	0.819231	1	1	646	tags=29%, list=24%, signal=38%
GOBP_NEGATIVE_REGULATION_OF_VASCULATURE_DEVELOPMENT	GOBP_NEGATIVE_REGULATION_OF_VASCULATURE_DEVELOPMENT		19	-0.265135	-0.775281	0.805118	1	1	321	tags=21%, list=12%, signal=24%
GOBP_ION_HOMEOSTASIS	GOBP_ION_HOMEOSTASIS		135	-0.178335	-0.774976	0.918977	1	1	504	tags=19%, list=19%, signal=22%
GOBP_REGULATION_OF_SYSTEM_PROCESS	GOBP_REGULATION_OF_SYSTEM_PROCESS		125	-0.184448	-0.773159	0.906489	1	1	520	tags=22%, list=19%, signal=25%
GOBP_SPECIFICATION_OF_SYMMETRY	GOBP_SPECIFICATION_OF_SYMMETRY		20	-0.271476	-0.772795	0.809524	1	1	107	tags=10%, list=4%, signal=10%
GOBP_REGULATION_OF_CELL_CYCLE_G2_M_PHASE_TRANSITION	GOBP_REGULATION_OF_CELL_CYCLE_G2_M_PHASE_TRANSITION		33	-0.219887	-0.772737	0.790356	1	1	59	tags=6%, list=2%, signal=6%
GOBP_STEROID_METABOLIC_PROCESS	GOBP_STEROID_METABOLIC_PROCESS		65	-0.219058	-0.772482	0.908023	1	1	553	tags=26%, list=20%, signal=32%
GOBP_CARBOHYDRATE_DERIVATIVE_TRANSPORT	GOBP_CARBOHYDRATE_DERIVATIVE_TRANSPORT		21	-0.264644	-0.770135	0.857724	1	1	843	tags=48%, list=31%, signal=68%
GOCC_ROUGH_ENDOPLASMIC_RETICULUM	GOCC_ROUGH_ENDOPLASMIC_RETICULUM		19	-0.233672	-0.769775	0.747534	1	1	67	tags=5%, list=2%, signal=5%
GOBP_REGULATION_OF_IMMUNE_EFFECTOR_PROCESS	GOBP_REGULATION_OF_IMMUNE_EFFECTOR_PROCESS		55	-0.204893	-0.766887	0.859611	1	1	608	tags=25%, list=22%, signal=32%
GOBP_MICROTUBULE_POLYMERIZATION	GOBP_MICROTUBULE_POLYMERIZATION		24	-0.242982	-0.766735	0.799587	1	1	369	tags=21%, list=14%, signal=24%
GOBP_POSITIVE_REGULATION_OF_EXOCYTOSIS	GOBP_POSITIVE_REGULATION_OF_EXOCYTOSIS		23	-0.262379	-0.765924	0.841603	1	1	455	tags=22%, list=17%, signal=26%
GOCC_MICROTUBULE	GOCC_MICROTUBULE		65	-0.204603	-0.765857	0.903661	1	1	354	tags=15%, list=13%, signal=17%
GOBP_REGULATION_OF_PROTEIN_TARGETING	GOBP_REGULATION_OF_PROTEIN_TARGETING		22	-0.240521	-0.759292	0.782353	1	1	886	tags=50%, list=33%, signal=74%
GOCC_CELL_PROJECTION_MEMBRANE	GOCC_CELL_PROJECTION_MEMBRANE		79	-0.197307	-0.756515	0.955734	1	1	580	tags=24%, list=21%, signal=30%
GOBP_ERK1_AND_ERK2_CASCADE	GOBP_ERK1_AND_ERK2_CASCADE		59	-0.222773	-0.755582	0.907173	1	1	400	tags=20%, list=15%, signal=23%
GOBP_POSITIVE_REGULATION_OF_CATION_CHANNEL_ACTIVITY	GOBP_POSITIVE_REGULATION_OF_CATION_CHANNEL_ACTIVITY		17	-0.262998	-0.755556	0.818372	1	1	737	tags=41%, list=27%, signal=56%
GOBP_CEREBRAL_CORTEX_DEVELOPMENT	GOBP_CEREBRAL_CORTEX_DEVELOPMENT		30	-0.239419	-0.754291	0.860606	1	1	286	tags=17%, list=10%, signal=18%
GOBP_CELLULAR_MONOVALENT_INORGANIC_CATION_HOMEOSTASIS	GOBP_CELLULAR_MONOVALENT_INORGANIC_CATION_HOMEOSTASIS		25	-0.235918	-0.753502	0.843985	1	1	504	tags=24%, list=19%, signal=29%
GOBP_SULFUR_COMPOUND_METABOLIC_PROCESS	GOBP_SULFUR_COMPOUND_METABOLIC_PROCESS		69	-0.220033	-0.753186	0.915811	1	1	862	tags=46%, list=32%, signal=66%
GOBP_REGULATION_OF_CELL_MORPHOGENESIS_INVOLVED_IN_DIFFERENTIATION	GOBP_REGULATION_OF_CELL_MORPHOGENESIS_INVOLVED_IN_DIFFERENTIATION		25	-0.264428	-0.752709	0.854167	1	1	618	tags=32%, list=23%, signal=41%
GOBP_REGULATION_OF_GLUCOSE_METABOLIC_PROCESS	GOBP_REGULATION_OF_GLUCOSE_METABOLIC_PROCESS		32	-0.251761	-0.751717	0.855446	1	1	429	tags=25%, list=16%, signal=29%
GOMF_HYDROLASE_ACTIVITY_ACTING_ON_CARBON_NITROGEN_BUT_NOT_PEPTIDE_BONDS	GOMF_HYDROLASE_ACTIVITY_ACTING_ON_CARBON_NITROGEN_BUT_NOT_PEPTIDE_BONDS		27	-0.240849	-0.751106	0.847737	1	1	170	tags=15%, list=6%, signal=16%
GOBP_NEGATIVE_REGULATION_OF_CYTOKINE_PRODUCTION	GOBP_NEGATIVE_REGULATION_OF_CYTOKINE_PRODUCTION		48	-0.20954	-0.750241	0.865979	1	1	590	tags=21%, list=22%, signal=26%
GOBP_REGULATION_OF_STRESS_ACTIVATED_PROTEIN_KINASE_SIGNALING_CASCADE	GOBP_REGULATION_OF_STRESS_ACTIVATED_PROTEIN_KINASE_SIGNALING_CASCADE		37	-0.221042	-0.749769	0.886555	1	1	290	tags=14%, list=11%, signal=15%
GOBP_METAL_ION_HOMEOSTASIS	GOBP_METAL_ION_HOMEOSTASIS		110	-0.172533	-0.748319	0.955882	1	1	492	tags=18%, list=18%, signal=21%
GOBP_RECEPTOR_METABOLIC_PROCESS	GOBP_RECEPTOR_METABOLIC_PROCESS		31	-0.222379	-0.748016	0.829875	1	1	801	tags=35%, list=29%, signal=50%
GOCC_COPII_COATED_ER_TO_GOLGI_TRANSPORT_VESICLE	GOCC_COPII_COATED_ER_TO_GOLGI_TRANSPORT_VESICLE		15	-0.263342	-0.747784	0.789264	1	1	770	tags=40%, list=28%, signal=55%
GOCC_COATED_VESICLE	GOCC_COATED_VESICLE		57	-0.18471	-0.746802	0.850099	1	1	811	tags=30%, list=30%, signal=42%
GOBP_NEGATIVE_REGULATION_OF_ERK1_AND_ERK2_CASCADE	GOBP_NEGATIVE_REGULATION_OF_ERK1_AND_ERK2_CASCADE		18	-0.265339	-0.745955	0.818792	1	1	1079	tags=61%, list=40%, signal=101%
GOBP_REGULATION_OF_ACTIN_FILAMENT_BUNDLE_ASSEMBLY	GOBP_REGULATION_OF_ACTIN_FILAMENT_BUNDLE_ASSEMBLY		30	-0.233524	-0.741818	0.90625	1	1	641	tags=33%, list=24%, signal=43%
GOBP_MICROTUBULE_BASED_PROCESS	GOBP_MICROTUBULE_BASED_PROCESS		138	-0.172682	-0.739427	0.949597	1	1	286	tags=12%, list=10%, signal=12%
GOMF_PROTEIN_PHOSPHATASE_BINDING	GOMF_PROTEIN_PHOSPHATASE_BINDING		36	-0.22107	-0.738783	0.89313	1	1	322	tags=14%, list=12%, signal=16%
GOBP_ACTION_POTENTIAL	GOBP_ACTION_POTENTIAL		42	-0.21542	-0.738597	0.868627	1	1	655	tags=29%, list=24%, signal=37%
GOBP_PROTEIN_TETRAMERIZATION	GOBP_PROTEIN_TETRAMERIZATION		23	-0.234467	-0.7364	0.887574	1	1	1108	tags=57%, list=41%, signal=94%
GOCC_CLUSTER_OF_ACTIN_BASED_CELL_PROJECTIONS	GOCC_CLUSTER_OF_ACTIN_BASED_CELL_PROJECTIONS		33	-0.226902	-0.735671	0.920893	1	1	521	tags=21%, list=19%, signal=26%
GOCC_PLASMA_MEMBRANE_SIGNALING_RECEPTOR_COMPLEX	GOCC_PLASMA_MEMBRANE_SIGNALING_RECEPTOR_COMPLEX		47	-0.210888	-0.734924	0.926441	1	1	579	tags=26%, list=21%, signal=32%
GOCC_CILIUM	GOCC_CILIUM		79	-0.202616	-0.734423	0.944015	1	1	488	tags=20%, list=18%, signal=24%
GOBP_POSITIVE_REGULATION_OF_IMMUNE_EFFECTOR_PROCESS	GOBP_POSITIVE_REGULATION_OF_IMMUNE_EFFECTOR_PROCESS		33	-0.222431	-0.732684	0.832981	1	1	487	tags=21%, list=18%, signal=26%
GOBP_REGULATION_OF_CARBOHYDRATE_BIOSYNTHETIC_PROCESS	GOBP_REGULATION_OF_CARBOHYDRATE_BIOSYNTHETIC_PROCESS		24	-0.248504	-0.731031	0.889796	1	1	43	tags=8%, list=2%, signal=8%
GOCC_PERIKARYON	GOCC_PERIKARYON		33	-0.229148	-0.730527	0.938525	1	1	917	tags=48%, list=34%, signal=72%
GOBP_MUSCLE_CONTRACTION	GOBP_MUSCLE_CONTRACTION		86	-0.186738	-0.730445	0.93858	1	1	280	tags=12%, list=10%, signal=13%
GOBP_POSITIVE_REGULATION_OF_CELLULAR_PROTEIN_LOCALIZATION	GOBP_POSITIVE_REGULATION_OF_CELLULAR_PROTEIN_LOCALIZATION		76	-0.181959	-0.730173	0.923077	1	1	447	tags=17%, list=16%, signal=20%
GOBP_MONOCARBOXYLIC_ACID_TRANSPORT	GOBP_MONOCARBOXYLIC_ACID_TRANSPORT		38	-0.221578	-0.729096	0.947573	1	1	651	tags=29%, list=24%, signal=38%
GOMF_G_PROTEIN_COUPLED_RECEPTOR_ACTIVITY	GOMF_G_PROTEIN_COUPLED_RECEPTOR_ACTIVITY		46	-0.218737	-0.728727	0.946429	1	1	670	tags=24%, list=25%, signal=31%
GOBP_DIVALENT_INORGANIC_CATION_HOMEOSTASIS	GOBP_DIVALENT_INORGANIC_CATION_HOMEOSTASIS		75	-0.182432	-0.72845	0.937768	1	1	785	tags=31%, list=29%, signal=42%
GOBP_ENDOCARDIAL_CUSHION_DEVELOPMENT	GOBP_ENDOCARDIAL_CUSHION_DEVELOPMENT		15	-0.25104	-0.727554	0.868476	1	1	806	tags=47%, list=30%, signal=66%
GOBP_POSITIVE_REGULATION_OF_PEPTIDE_SECRETION	GOBP_POSITIVE_REGULATION_OF_PEPTIDE_SECRETION		34	-0.211733	-0.726436	0.903733	1	1	43	tags=6%, list=2%, signal=6%
GOBP_REGULATION_OF_SIGNALING_RECEPTOR_ACTIVITY	GOBP_REGULATION_OF_SIGNALING_RECEPTOR_ACTIVITY		39	-0.204112	-0.72586	0.885659	1	1	579	tags=26%, list=21%, signal=32%
GOCC_CLATHRIN_COATED_VESICLE_MEMBRANE	GOCC_CLATHRIN_COATED_VESICLE_MEMBRANE		22	-0.233797	-0.72552	0.83	1	1	21	tags=5%, list=1%, signal=5%
GOBP_REGULATION_OF_RESPONSE_TO_STRESS	GOBP_REGULATION_OF_RESPONSE_TO_STRESS		272	-0.152411	-0.724953	0.985944	1	1	626	tags=22%, list=23%, signal=25%
GOBP_BRANCHING_MORPHOGENESIS_OF_AN_EPITHELIAL_TUBE	GOBP_BRANCHING_MORPHOGENESIS_OF_AN_EPITHELIAL_TUBE		39	-0.205185	-0.724873	0.885149	1	1	578	tags=28%, list=21%, signal=35%
GOBP_DICARBOXYLIC_ACID_TRANSPORT	GOBP_DICARBOXYLIC_ACID_TRANSPORT		22	-0.249947	-0.724561	0.919847	1	1	651	tags=27%, list=24%, signal=36%
GOBP_RESPONSE_TO_CATECHOLAMINE	GOBP_RESPONSE_TO_CATECHOLAMINE		17	-0.285891	-0.72358	0.823529	1	1	282	tags=18%, list=10%, signal=20%
GOBP_SODIUM_ION_TRANSMEMBRANE_TRANSPORT	GOBP_SODIUM_ION_TRANSMEMBRANE_TRANSPORT		40	-0.211937	-0.722607	0.901328	1	1	592	tags=25%, list=22%, signal=31%
GOBP_REGULATION_OF_WOUND_HEALING	GOBP_REGULATION_OF_WOUND_HEALING		31	-0.230515	-0.721358	0.906374	1	1	499	tags=19%, list=18%, signal=23%
GOBP_REGULATION_OF_RESPONSE_TO_DNA_DAMAGE_STIMULUS	GOBP_REGULATION_OF_RESPONSE_TO_DNA_DAMAGE_STIMULUS		45	-0.193039	-0.721163	0.906188	1	1	321	tags=11%, list=12%, signal=12%
GOMF_CATION_CHANNEL_ACTIVITY	GOMF_CATION_CHANNEL_ACTIVITY		74	-0.18398	-0.716755	0.983437	1	1	663	tags=27%, list=24%, signal=35%
GOBP_REGULATION_OF_WNT_SIGNALING_PATHWAY	GOBP_REGULATION_OF_WNT_SIGNALING_PATHWAY		73	-0.184542	-0.716651	0.920849	1	1	1012	tags=47%, list=37%, signal=72%
GOBP_REGULATION_OF_CATION_TRANSMEMBRANE_TRANSPORT	GOBP_REGULATION_OF_CATION_TRANSMEMBRANE_TRANSPORT		59	-0.176345	-0.715938	0.927711	1	1	785	tags=37%, list=29%, signal=51%
GOBP_PROTEIN_LOCALIZATION_TO_ENDOPLASMIC_RETICULUM	GOBP_PROTEIN_LOCALIZATION_TO_ENDOPLASMIC_RETICULUM		42	-0.164057	-0.712678	0.801587	1	1	2285	tags=100%, list=84%, signal=611%
GOBP_RIBONUCLEOTIDE_CATABOLIC_PROCESS	GOBP_RIBONUCLEOTIDE_CATABOLIC_PROCESS		15	-0.262229	-0.711427	0.836439	1	1	832	tags=40%, list=31%, signal=57%
GOCC_INTRINSIC_COMPONENT_OF_ORGANELLE_MEMBRANE	GOCC_INTRINSIC_COMPONENT_OF_ORGANELLE_MEMBRANE		44	-0.218448	-0.710784	0.919588	1	1	727	tags=32%, list=27%, signal=43%
GOBP_REGULATION_OF_DNA_TEMPLATED_TRANSCRIPTION_IN_RESPONSE_TO_STRESS	GOBP_REGULATION_OF_DNA_TEMPLATED_TRANSCRIPTION_IN_RESPONSE_TO_STRESS		27	-0.209496	-0.710254	0.859073	1	1	941	tags=41%, list=35%, signal=62%
GOBP_STRESS_ACTIVATED_PROTEIN_KINASE_SIGNALING_CASCADE	GOBP_STRESS_ACTIVATED_PROTEIN_KINASE_SIGNALING_CASCADE		61	-0.187302	-0.709971	0.936975	1	1	290	tags=11%, list=11%, signal=13%
GOCC_CELL_BODY	GOCC_CELL_BODY		131	-0.167603	-0.70971	0.987952	1	1	580	tags=18%, list=21%, signal=22%
GOBP_MORPHOGENESIS_OF_A_BRANCHING_STRUCTURE	GOBP_MORPHOGENESIS_OF_A_BRANCHING_STRUCTURE		51	-0.212751	-0.709352	0.915187	1	1	578	tags=29%, list=21%, signal=37%
GOBP_RIBOSOMAL_LARGE_SUBUNIT_BIOGENESIS	GOBP_RIBOSOMAL_LARGE_SUBUNIT_BIOGENESIS		16	-0.209703	-0.709236	0.85041	1	1	68	tags=6%, list=2%, signal=6%
GOBP_POSITIVE_REGULATION_OF_LIPASE_ACTIVITY	GOBP_POSITIVE_REGULATION_OF_LIPASE_ACTIVITY		16	-0.237509	-0.707709	0.832347	1	1	838	tags=31%, list=31%, signal=45%
GOBP_G_PROTEIN_COUPLED_RECEPTOR_SIGNALING_PATHWAY	GOBP_G_PROTEIN_COUPLED_RECEPTOR_SIGNALING_PATHWAY		143	-0.173496	-0.70682	0.996024	1	1	771	tags=27%, list=28%, signal=35%
GOBP_MITOTIC_CYTOKINESIS	GOBP_MITOTIC_CYTOKINESIS		15	-0.260714	-0.70485	0.861538	1	1	482	tags=27%, list=18%, signal=32%
GOBP_LIPOPROTEIN_METABOLIC_PROCESS	GOBP_LIPOPROTEIN_METABOLIC_PROCESS		20	-0.257295	-0.704378	0.909434	1	1	433	tags=30%, list=16%, signal=35%
GOBP_POSITIVE_REGULATION_OF_NEURON_DEATH	GOBP_POSITIVE_REGULATION_OF_NEURON_DEATH		24	-0.247507	-0.70274	0.90239	1	1	400	tags=25%, list=15%, signal=29%
GOBP_REGULATION_OF_CATION_CHANNEL_ACTIVITY	GOBP_REGULATION_OF_CATION_CHANNEL_ACTIVITY		39	-0.180897	-0.698455	0.927757	1	1	737	tags=36%, list=27%, signal=49%
GOBP_TRANSMISSION_OF_NERVE_IMPULSE	GOBP_TRANSMISSION_OF_NERVE_IMPULSE		21	-0.227605	-0.697201	0.898711	1	1	520	tags=24%, list=19%, signal=29%
GOBP_REGULATION_OF_ACTOMYOSIN_STRUCTURE_ORGANIZATION	GOBP_REGULATION_OF_ACTOMYOSIN_STRUCTURE_ORGANIZATION		31	-0.220621	-0.696412	0.958498	1	1	641	tags=32%, list=24%, signal=42%
GOBP_PROTEIN_POLYUBIQUITINATION	GOBP_PROTEIN_POLYUBIQUITINATION		75	-0.170554	-0.695481	0.949187	1	1	394	tags=13%, list=14%, signal=15%
GOBP_REGULATION_OF_INFLAMMATORY_RESPONSE	GOBP_REGULATION_OF_INFLAMMATORY_RESPONSE		54	-0.188599	-0.694695	0.953488	1	1	582	tags=20%, list=21%, signal=25%
GOBP_GLYCOSYL_COMPOUND_METABOLIC_PROCESS	GOBP_GLYCOSYL_COMPOUND_METABOLIC_PROCESS		26	-0.200892	-0.693998	0.921325	1	1	310	tags=15%, list=11%, signal=17%
GOBP_REGULATION_OF_VIRAL_LIFE_CYCLE	GOBP_REGULATION_OF_VIRAL_LIFE_CYCLE		29	-0.207662	-0.691398	0.8833	1	1	660	tags=31%, list=24%, signal=41%
GOMF_BETA_CATENIN_BINDING	GOMF_BETA_CATENIN_BINDING		18	-0.252122	-0.691355	0.895833	1	1	432	tags=22%, list=16%, signal=26%
GOBP_RESPONSE_TO_ENDOPLASMIC_RETICULUM_STRESS	GOBP_RESPONSE_TO_ENDOPLASMIC_RETICULUM_STRESS		55	-0.162634	-0.691223	0.929435	1	1	395	tags=15%, list=15%, signal=17%
GOBP_HEART_VALVE_DEVELOPMENT	GOBP_HEART_VALVE_DEVELOPMENT		15	-0.24356	-0.690117	0.927565	1	1	806	tags=47%, list=30%, signal=66%
GOCC_INTRINSIC_COMPONENT_OF_ENDOPLASMIC_RETICULUM_MEMBRANE	GOCC_INTRINSIC_COMPONENT_OF_ENDOPLASMIC_RETICULUM_MEMBRANE		18	-0.259481	-0.688611	0.877378	1	1	681	tags=33%, list=25%, signal=44%
GOBP_POSITIVE_REGULATION_OF_I_KAPPAB_KINASE_NF_KAPPAB_SIGNALING	GOBP_POSITIVE_REGULATION_OF_I_KAPPAB_KINASE_NF_KAPPAB_SIGNALING		34	-0.196123	-0.688344	0.909091	1	1	433	tags=18%, list=16%, signal=21%
GOBP_STRESS_FIBER_ASSEMBLY	GOBP_STRESS_FIBER_ASSEMBLY		29	-0.217375	-0.687114	0.94347	1	1	641	tags=31%, list=24%, signal=40%
GOBP_RECEPTOR_INTERNALIZATION	GOBP_RECEPTOR_INTERNALIZATION		21	-0.215451	-0.685622	0.862626	1	1	792	tags=33%, list=29%, signal=47%
GOCC_PRESYNAPTIC_MEMBRANE	GOCC_PRESYNAPTIC_MEMBRANE		41	-0.20841	-0.684636	0.935294	1	1	190	tags=7%, list=7%, signal=8%
GOBP_CELL_COMMUNICATION_INVOLVED_IN_CARDIAC_CONDUCTION	GOBP_CELL_COMMUNICATION_INVOLVED_IN_CARDIAC_CONDUCTION		15	-0.237379	-0.680758	0.899209	1	1	733	tags=40%, list=27%, signal=54%
GOBP_CELLULAR_IRON_ION_HOMEOSTASIS	GOBP_CELLULAR_IRON_ION_HOMEOSTASIS		16	-0.252353	-0.67716	0.904858	1	1	441	tags=25%, list=16%, signal=30%
GOBP_REGULATION_OF_METAL_ION_TRANSPORT	GOBP_REGULATION_OF_METAL_ION_TRANSPORT		39	-0.194724	-0.676519	0.940299	1	1	785	tags=38%, list=29%, signal=53%
GOBP_REGULATION_OF_SYNAPTIC_PLASTICITY	GOBP_REGULATION_OF_SYNAPTIC_PLASTICITY		38	-0.184605	-0.676333	0.940828	1	1	471	tags=18%, list=17%, signal=22%
GOBP_PYRIMIDINE_CONTAINING_COMPOUND_METABOLIC_PROCESS	GOBP_PYRIMIDINE_CONTAINING_COMPOUND_METABOLIC_PROCESS		16	-0.206811	-0.6751	0.92	1	1	310	tags=13%, list=11%, signal=14%
GOBP_ORGANELLE_LOCALIZATION	GOBP_ORGANELLE_LOCALIZATION		127	-0.152493	-0.673828	0.984615	1	1	679	tags=23%, list=25%, signal=29%
GOBP_ENDOTHELIAL_CELL_DEVELOPMENT	GOBP_ENDOTHELIAL_CELL_DEVELOPMENT		16	-0.220861	-0.672179	0.880309	1	1	924	tags=44%, list=34%, signal=66%
GOMF_INORGANIC_ANION_TRANSMEMBRANE_TRANSPORTER_ACTIVITY	GOMF_INORGANIC_ANION_TRANSMEMBRANE_TRANSPORTER_ACTIVITY		28	-0.212901	-0.669813	0.948617	1	1	191	tags=11%, list=7%, signal=11%
GOBP_NEGATIVE_REGULATION_OF_PROTEIN_CONTAINING_COMPLEX_DISASSEMBLY	GOBP_NEGATIVE_REGULATION_OF_PROTEIN_CONTAINING_COMPLEX_DISASSEMBLY		20	-0.220305	-0.664787	0.912525	1	1	24	tags=5%, list=1%, signal=5%
GOBP_HORMONE_BIOSYNTHETIC_PROCESS	GOBP_HORMONE_BIOSYNTHETIC_PROCESS		15	-0.248548	-0.664457	0.949438	1	1	553	tags=27%, list=20%, signal=33%
GOMF_ENDOPEPTIDASE_REGULATOR_ACTIVITY	GOMF_ENDOPEPTIDASE_REGULATOR_ACTIVITY		22	-0.226205	-0.66281	0.931641	1	1	839	tags=45%, list=31%, signal=65%
GOBP_POSITIVE_REGULATION_OF_RESPONSE_TO_DNA_DAMAGE_STIMULUS	GOBP_POSITIVE_REGULATION_OF_RESPONSE_TO_DNA_DAMAGE_STIMULUS		18	-0.212976	-0.659505	0.93083	1	1	81	tags=6%, list=3%, signal=6%
GOBP_IMMUNOGLOBULIN_PRODUCTION	GOBP_IMMUNOGLOBULIN_PRODUCTION		15	-0.231091	-0.657402	0.891519	1	1	21	tags=7%, list=1%, signal=7%
GOBP_NEPHRON_EPITHELIUM_DEVELOPMENT	GOBP_NEPHRON_EPITHELIUM_DEVELOPMENT		24	-0.205837	-0.655717	0.958743	1	1	516	tags=25%, list=19%, signal=31%
GOBP_REGULATION_OF_RESPONSE_TO_CYTOKINE_STIMULUS	GOBP_REGULATION_OF_RESPONSE_TO_CYTOKINE_STIMULUS		24	-0.216462	-0.654098	0.936214	1	1	660	tags=33%, list=24%, signal=44%
GOBP_CARDIAC_MUSCLE_CELL_CONTRACTION	GOBP_CARDIAC_MUSCLE_CELL_CONTRACTION		23	-0.220947	-0.653408	0.934694	1	1	777	tags=35%, list=29%, signal=48%
GOMF_VOLTAGE_GATED_ION_CHANNEL_ACTIVITY	GOMF_VOLTAGE_GATED_ION_CHANNEL_ACTIVITY		46	-0.173891	-0.652615	0.980198	1	1	737	tags=30%, list=27%, signal=41%
GOBP_CYTOSOLIC_CALCIUM_ION_TRANSPORT	GOBP_CYTOSOLIC_CALCIUM_ION_TRANSPORT		35	-0.179256	-0.652506	0.966203	1	1	659	tags=29%, list=24%, signal=37%
GOBP_GLAND_MORPHOGENESIS	GOBP_GLAND_MORPHOGENESIS		34	-0.204301	-0.65246	0.949083	1	1	321	tags=15%, list=12%, signal=16%
GOMF_HORMONE_BINDING	GOMF_HORMONE_BINDING		17	-0.259023	-0.651962	0.929167	1	1	392	tags=18%, list=14%, signal=20%
GOCC_POSTSYNAPTIC_MEMBRANE	GOCC_POSTSYNAPTIC_MEMBRANE		71	-0.169577	-0.650322	0.988142	1	1	784	tags=37%, list=29%, signal=50%
GOBP_EMBRYONIC_APPENDAGE_MORPHOGENESIS	GOBP_EMBRYONIC_APPENDAGE_MORPHOGENESIS		30	-0.198839	-0.646783	0.939453	1	1	457	tags=17%, list=17%, signal=20%
GOBP_CHLORIDE_TRANSPORT	GOBP_CHLORIDE_TRANSPORT		25	-0.210954	-0.646553	0.948177	1	1	106	tags=8%, list=4%, signal=8%
GOBP_MORPHOGENESIS_OF_EMBRYONIC_EPITHELIUM	GOBP_MORPHOGENESIS_OF_EMBRYONIC_EPITHELIUM		30	-0.216528	-0.646212	0.969072	1	1	121	tags=10%, list=4%, signal=10%
GOMF_METALLOENDOPEPTIDASE_ACTIVITY	GOMF_METALLOENDOPEPTIDASE_ACTIVITY		28	-0.220369	-0.64177	0.964803	1	1	403	tags=18%, list=15%, signal=21%
GOBP_INORGANIC_ANION_TRANSPORT	GOBP_INORGANIC_ANION_TRANSPORT		35	-0.187854	-0.64028	0.966601	1	1	375	tags=14%, list=14%, signal=16%
GOBP_LIPOSACCHARIDE_METABOLIC_PROCESS	GOBP_LIPOSACCHARIDE_METABOLIC_PROCESS		22	-0.235582	-0.638846	0.976331	1	1	355	tags=18%, list=13%, signal=21%
GOCC_ENDOPLASMIC_RETICULUM_PROTEIN_CONTAINING_COMPLEX	GOCC_ENDOPLASMIC_RETICULUM_PROTEIN_CONTAINING_COMPLEX		19	-0.244772	-0.637972	0.922131	1	1	821	tags=32%, list=30%, signal=45%
GOBP_REGULATION_OF_PRODUCTION_OF_MOLECULAR_MEDIATOR_OF_IMMUNE_RESPONSE	GOBP_REGULATION_OF_PRODUCTION_OF_MOLECULAR_MEDIATOR_OF_IMMUNE_RESPONSE		21	-0.21028	-0.637446	0.932099	1	1	582	tags=24%, list=21%, signal=30%
GOCC_CULLIN_RING_UBIQUITIN_LIGASE_COMPLEX	GOCC_CULLIN_RING_UBIQUITIN_LIGASE_COMPLEX		23	-0.21501	-0.637116	0.904762	1	1	684	tags=26%, list=25%, signal=35%
GOBP_REGULATION_OF_LIPASE_ACTIVITY	GOBP_REGULATION_OF_LIPASE_ACTIVITY		25	-0.204174	-0.634412	0.965451	1	1	453	tags=16%, list=17%, signal=19%
GOBP_POSITIVE_REGULATION_OF_LIPID_LOCALIZATION	GOBP_POSITIVE_REGULATION_OF_LIPID_LOCALIZATION		19	-0.199048	-0.633018	0.955285	1	1	699	tags=32%, list=26%, signal=42%
GOBP_NEGATIVE_REGULATION_OF_VIRAL_PROCESS	GOBP_NEGATIVE_REGULATION_OF_VIRAL_PROCESS		18	-0.224971	-0.631996	0.934132	1	1	660	tags=28%, list=24%, signal=36%
GOBP_NEGATIVE_REGULATION_OF_CELLULAR_PROTEIN_LOCALIZATION	GOBP_NEGATIVE_REGULATION_OF_CELLULAR_PROTEIN_LOCALIZATION		27	-0.222782	-0.629772	0.93837	1	1	587	tags=30%, list=22%, signal=37%
GOBP_EMBRYONIC_PLACENTA_DEVELOPMENT	GOBP_EMBRYONIC_PLACENTA_DEVELOPMENT		15	-0.209589	-0.62929	0.943689	1	1	450	tags=20%, list=17%, signal=24%
GOBP_CELL_CELL_JUNCTION_ASSEMBLY	GOBP_CELL_CELL_JUNCTION_ASSEMBLY		34	-0.193106	-0.628187	0.979879	1	1	297	tags=12%, list=11%, signal=13%
GOBP_REGULATION_OF_PROTEIN_CONTAINING_COMPLEX_DISASSEMBLY	GOBP_REGULATION_OF_PROTEIN_CONTAINING_COMPLEX_DISASSEMBLY		29	-0.199929	-0.623468	0.951904	1	1	368	tags=14%, list=14%, signal=16%
GOBP_BLASTOCYST_DEVELOPMENT	GOBP_BLASTOCYST_DEVELOPMENT		15	-0.225155	-0.621703	0.930368	1	1	317	tags=13%, list=12%, signal=15%
GOCC_CILIARY_BASAL_BODY	GOCC_CILIARY_BASAL_BODY		18	-0.229627	-0.620249	0.956436	1	1	448	tags=22%, list=16%, signal=26%
GOMF_CHLORIDE_TRANSMEMBRANE_TRANSPORTER_ACTIVITY	GOMF_CHLORIDE_TRANSMEMBRANE_TRANSPORTER_ACTIVITY		23	-0.212152	-0.616449	0.971154	1	1	106	tags=9%, list=4%, signal=9%
GOBP_MEIOTIC_CELL_CYCLE	GOBP_MEIOTIC_CELL_CYCLE		38	-0.187786	-0.601718	0.983673	1	1	338	tags=11%, list=12%, signal=12%
GOBP_T_CELL_MEDIATED_IMMUNITY	GOBP_T_CELL_MEDIATED_IMMUNITY		17	-0.198146	-0.601349	0.957854	1	1	487	tags=18%, list=18%, signal=21%
GOBP_MEIOTIC_CELL_CYCLE_PROCESS	GOBP_MEIOTIC_CELL_CYCLE_PROCESS		29	-0.202475	-0.598913	0.989899	1	1	338	tags=10%, list=12%, signal=12%
GOBP_ANAPHASE_PROMOTING_COMPLEX_DEPENDENT_CATABOLIC_PROCESS	GOBP_ANAPHASE_PROMOTING_COMPLEX_DEPENDENT_CATABOLIC_PROCESS		15	-0.218412	-0.597426	0.917864	1	1	59	tags=7%, list=2%, signal=7%
GOBP_POSITIVE_REGULATION_OF_CALCIUM_ION_TRANSPORT	GOBP_POSITIVE_REGULATION_OF_CALCIUM_ION_TRANSPORT		18	-0.213363	-0.596773	0.962025	1	1	777	tags=39%, list=29%, signal=54%
GOBP_SPINDLE_ORGANIZATION	GOBP_SPINDLE_ORGANIZATION		31	-0.191532	-0.592874	0.982422	1	1	59	tags=6%, list=2%, signal=7%
GOBP_REGULATION_OF_HEART_RATE	GOBP_REGULATION_OF_HEART_RATE		22	-0.185028	-0.592563	0.95858	1	1	959	tags=50%, list=35%, signal=77%
GOBP_COAGULATION	GOBP_COAGULATION		85	-0.153655	-0.588257	0.998054	1	1	488	tags=14%, list=18%, signal=17%
GOBP_PROTEIN_TARGETING_TO_MEMBRANE	GOBP_PROTEIN_TARGETING_TO_MEMBRANE		56	-0.125888	-0.587353	0.952663	1	1	737	tags=18%, list=27%, signal=24%
GOBP_VIRAL_GENOME_REPLICATION	GOBP_VIRAL_GENOME_REPLICATION		26	-0.186246	-0.585553	0.965092	1	1	660	tags=31%, list=24%, signal=40%
GOMF_OMEGA_PEPTIDASE_ACTIVITY	GOMF_OMEGA_PEPTIDASE_ACTIVITY		25	-0.22637	-0.579715	0.964356	1	1	465	tags=24%, list=17%, signal=29%
GOBP_ORGANIC_HYDROXY_COMPOUND_CATABOLIC_PROCESS	GOBP_ORGANIC_HYDROXY_COMPOUND_CATABOLIC_PROCESS		15	-0.225531	-0.5787	0.965863	1	1	545	tags=20%, list=20%, signal=25%
GOBP_APPENDAGE_MORPHOGENESIS	GOBP_APPENDAGE_MORPHOGENESIS		36	-0.171476	-0.577015	0.979879	1	1	457	tags=17%, list=17%, signal=20%
GOBP_REGULATION_OF_PHAGOCYTOSIS	GOBP_REGULATION_OF_PHAGOCYTOSIS		19	-0.197983	-0.574971	0.963362	1	1	1015	tags=53%, list=37%, signal=83%
GOBP_REGULATION_OF_POSTSYNAPTIC_MEMBRANE_POTENTIAL	GOBP_REGULATION_OF_POSTSYNAPTIC_MEMBRANE_POTENTIAL		27	-0.178831	-0.574641	0.994242	1	1	1096	tags=52%, list=40%, signal=86%
GOBP_CYTOSKELETON_DEPENDENT_CYTOKINESIS	GOBP_CYTOSKELETON_DEPENDENT_CYTOKINESIS		18	-0.210732	-0.573421	0.976608	1	1	482	tags=22%, list=18%, signal=27%
GOBP_LOCOMOTORY_BEHAVIOR	GOBP_LOCOMOTORY_BEHAVIOR		39	-0.165587	-0.572067	0.991735	1	1	983	tags=46%, list=36%, signal=71%
GOBP_ACTIN_FILAMENT_BASED_MOVEMENT	GOBP_ACTIN_FILAMENT_BASED_MOVEMENT		38	-0.17114	-0.572013	0.985859	1	1	777	tags=26%, list=29%, signal=36%
GOBP_PRODUCTION_OF_MOLECULAR_MEDIATOR_OF_IMMUNE_RESPONSE	GOBP_PRODUCTION_OF_MOLECULAR_MEDIATOR_OF_IMMUNE_RESPONSE		30	-0.167983	-0.569375	0.977459	1	1	582	tags=20%, list=21%, signal=25%
GOBP_POSITIVE_REGULATION_OF_TUMOR_NECROSIS_FACTOR_SUPERFAMILY_CYTOKINE_PRODUCTION	GOBP_POSITIVE_REGULATION_OF_TUMOR_NECROSIS_FACTOR_SUPERFAMILY_CYTOKINE_PRODUCTION		18	-0.195032	-0.568584	0.959916	1	1	543	tags=17%, list=20%, signal=21%
GOCC_INTRINSIC_COMPONENT_OF_PRESYNAPTIC_MEMBRANE	GOCC_INTRINSIC_COMPONENT_OF_PRESYNAPTIC_MEMBRANE		20	-0.197843	-0.56837	0.971645	1	1	190	tags=10%, list=7%, signal=11%
GOBP_CELL_KILLING	GOBP_CELL_KILLING		24	-0.183298	-0.567677	0.968504	1	1	213	tags=8%, list=8%, signal=9%
GOBP_DIENCEPHALON_DEVELOPMENT	GOBP_DIENCEPHALON_DEVELOPMENT		19	-0.187745	-0.565228	0.995885	1	1	1012	tags=47%, list=37%, signal=75%
GOBP_REGULATION_OF_LIPID_TRANSPORT	GOBP_REGULATION_OF_LIPID_TRANSPORT		20	-0.196263	-0.560881	0.972656	1	1	694	tags=30%, list=25%, signal=40%
GOBP_T_CELL_RECEPTOR_SIGNALING_PATHWAY	GOBP_T_CELL_RECEPTOR_SIGNALING_PATHWAY		35	-0.168371	-0.560592	0.972163	1	1	231	tags=9%, list=8%, signal=9%
GOBP_REGULATION_OF_PEPTIDYL_LYSINE_ACETYLATION	GOBP_REGULATION_OF_PEPTIDYL_LYSINE_ACETYLATION		16	-0.1839	-0.558759	0.980431	1	1	2227	tags=100%, list=82%, signal=545%
GOBP_MEMBRANE_LIPID_BIOSYNTHETIC_PROCESS	GOBP_MEMBRANE_LIPID_BIOSYNTHETIC_PROCESS		21	-0.207719	-0.555741	0.984344	1	1	298	tags=14%, list=11%, signal=16%
GOBP_CHEMICAL_SYNAPTIC_TRANSMISSION_POSTSYNAPTIC	GOBP_CHEMICAL_SYNAPTIC_TRANSMISSION_POSTSYNAPTIC		17	-0.194858	-0.554462	0.988327	1	1	718	tags=29%, list=26%, signal=40%
GOBP_REGULATION_OF_ACTION_POTENTIAL	GOBP_REGULATION_OF_ACTION_POTENTIAL		15	-0.210682	-0.551127	0.973415	1	1	733	tags=40%, list=27%, signal=54%
GOBP_LIPID_EXPORT_FROM_CELL	GOBP_LIPID_EXPORT_FROM_CELL		20	-0.184025	-0.537214	0.980732	1	1	673	tags=25%, list=25%, signal=33%
GOBP_ACTIN_MEDIATED_CELL_CONTRACTION	GOBP_ACTIN_MEDIATED_CELL_CONTRACTION		32	-0.168445	-0.526134	0.983936	1	1	777	tags=28%, list=29%, signal=39%
GOBP_MULTICELLULAR_ORGANISMAL_RESPONSE_TO_STRESS	GOBP_MULTICELLULAR_ORGANISMAL_RESPONSE_TO_STRESS		16	-0.201877	-0.523786	0.99384	1	1	203	tags=13%, list=7%, signal=13%
GOBP_IMMUNE_RESPONSE_REGULATING_SIGNALING_PATHWAY	GOBP_IMMUNE_RESPONSE_REGULATING_SIGNALING_PATHWAY		78	-0.134239	-0.522746	1	1	1	820	tags=28%, list=30%, signal=39%
GOBP_ANTIGEN_RECEPTOR_MEDIATED_SIGNALING_PATHWAY	GOBP_ANTIGEN_RECEPTOR_MEDIATED_SIGNALING_PATHWAY		42	-0.154075	-0.516042	0.993617	1	1	369	tags=12%, list=14%, signal=14%
GOBP_REGULATION_OF_STEM_CELL_DIFFERENTIATION	GOBP_REGULATION_OF_STEM_CELL_DIFFERENTIATION		27	-0.160965	-0.514757	0.996063	0.999271	1	529	tags=22%, list=19%, signal=27%
GOBP_POSITIVE_REGULATION_OF_PEPTIDE_HORMONE_SECRETION	GOBP_POSITIVE_REGULATION_OF_PEPTIDE_HORMONE_SECRETION		22	-0.166423	-0.514093	0.985915	0.998231	1	785	tags=27%, list=29%, signal=38%
GOBP_MEMBRANE_LIPID_METABOLIC_PROCESS	GOBP_MEMBRANE_LIPID_METABOLIC_PROCESS		31	-0.174736	-0.513649	0.996008	0.997162	1	355	tags=13%, list=13%, signal=15%
GOBP_NUCLEOSIDE_MONOPHOSPHATE_METABOLIC_PROCESS	GOBP_NUCLEOSIDE_MONOPHOSPHATE_METABOLIC_PROCESS		16	-0.167279	-0.497177	0.987179	0.997696	1	931	tags=44%, list=34%, signal=66%
GOBP_REGULATION_OF_NEURAL_PRECURSOR_CELL_PROLIFERATION	GOBP_REGULATION_OF_NEURAL_PRECURSOR_CELL_PROLIFERATION		18	-0.180324	-0.486313	0.998008	0.997517	1	580	tags=22%, list=21%, signal=28%
GOBP_POSITIVE_REGULATION_OF_INFLAMMATORY_RESPONSE	GOBP_POSITIVE_REGULATION_OF_INFLAMMATORY_RESPONSE		25	-0.121526	-0.396074	1	0.999718	1	2397	tags=100%, list=88%, signal=825%
